# Supplementary material for: Caulis Polygoni Multiflori Accelerates Megakaryopoiesis and Thrombopoiesis via Activating PI3K/Akt and MEK/ERK Signaling Pathways
Source: MDPI journal article supplement (doi:10.3390/ph15101204), 2022-09-28
Supplement: s1 [file s1]

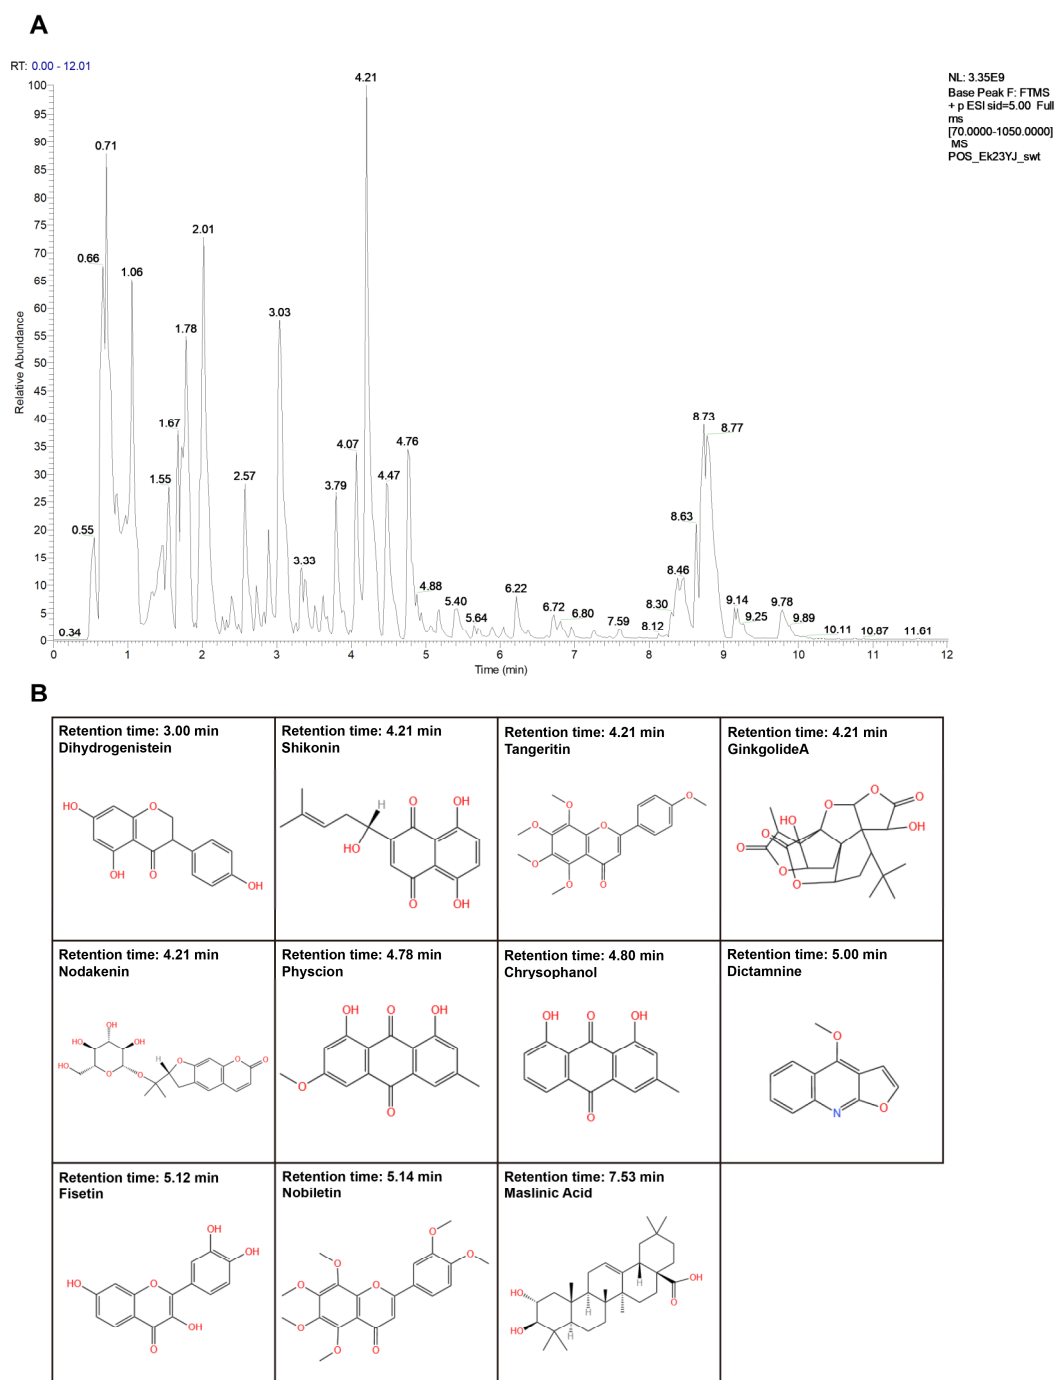

**Figure S1.** Characterization of CPM by UHPLC QE HF-X MS. **(A)** Total ion chromatogram of CPM. **(B)** Retention times, names and chemical structures of these 11 characterized compounds.

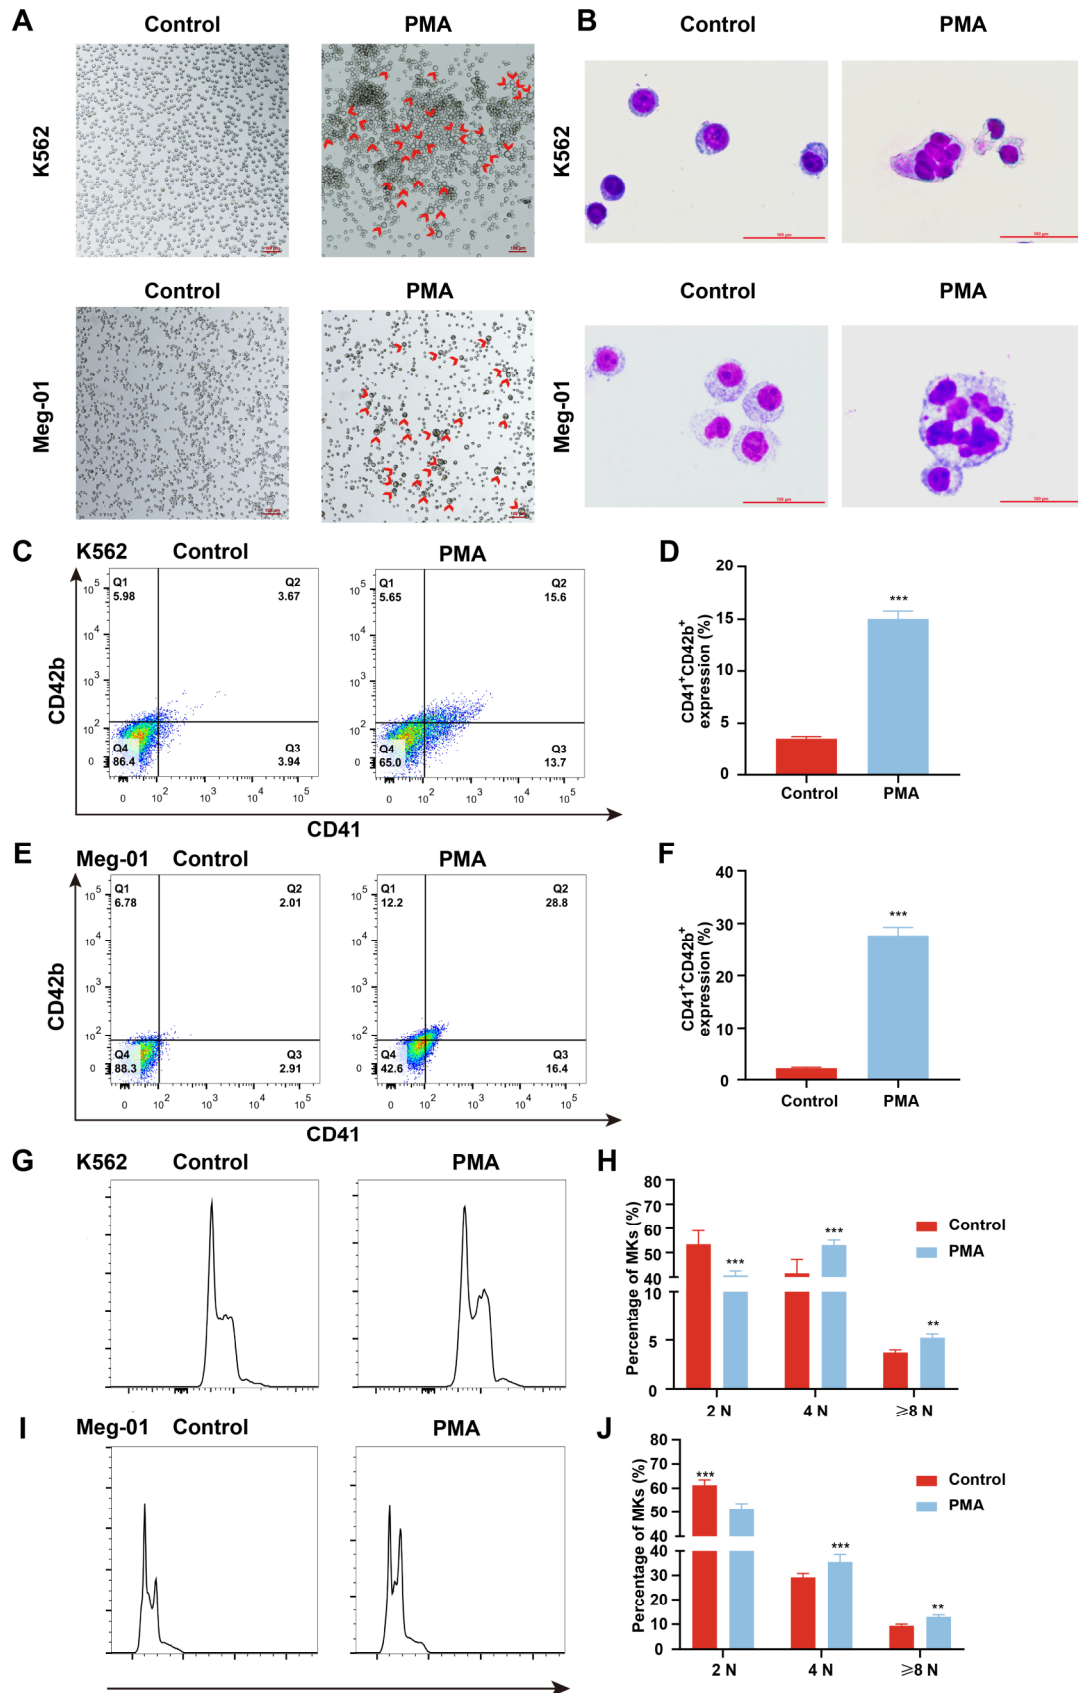

**Figure S2.** MK differentiation of K562 and Meg-01 cells induced by PMA. (A) Microscope photographs of K562 and Meg-01 cells with or without PMA treatment (1 nM) for 5 days were randomly captured at 10 $\times$  resolution under the inverted light microscope. Scar bar: 100  $\mu$ m. (B)

Giemsa staining of K562 and Meg-01 cells treated with or without PMA (1 nM) for 5 days. Scar bar: 100  $\mu$ m. (C, E) CD41 and CD42b expression of K562 and Meg-01 cells with or without PMA (1 nM) treatment for 5 days. (D, F) The proportion of CD41<sup>+</sup>CD42b<sup>+</sup> cells in control and PMA-treated groups. Data are mean  $\pm$  SD (n=3). (G, I) DNA ploidy analysis of K562 and Meg-01 cells with or without PMA (1 nM) treatment for 5 days. (H, J) The percentage of 2N, 4N and  $\geq$  8N cells in control and PMA-treated group. Data are mean  $\pm$  SD (n=3, ANOVA). \*  $p < 0.05$ , \*\*  $p < 0.01$ , \*\*\*  $p < 0.001$  vs. the control group.
