# Supplementary material for: Caulis Polygoni Multiflori Accelerates Megakaryopoiesis and Thrombopoiesis via Activating PI3K/Akt and MEK/ERK Signaling Pathways
Source: Pharmaceuticals (Basel). 2022 Sep 28;15(10):1204. doi: 10.3390/ph15101204 (PMC9607024; doi:10.3390/ph15101204)
Supplement: Supplementary file 1 [file pharmaceuticals-15-01204-s001.zip › Table S1.csv]

Gene_id	Gene name	Gene description	FC(CPM/Control)	Log2FC(CPM/Control)	Pvalue	Padjust	Significant	Regulate	K2	K3	K4	K5	D1	D2	D3	D4	Control	CPM
ENSG00000005187	ACSM3	acyl-CoA synthetase medium chain family member 3 [Source:HGNC Symbol;Acc:HGNC:10522]	0.424029953	-1.237761918	0	0	yes	down	129.45	132.15	131.7	141.35	48.92	53.07	52.07	50.07	133.6625	51.0325
ENSG00000136997	MYC	MYC proto-oncogene, bHLH transcription factor [Source:HGNC Symbol;Acc:HGNC:7553]	2.085440837	1.060352384	0	0	yes	up	140.64	144.28	138.42	142.29	301.21	286.28	290.91	300.5	141.4075	294.725
ENSG00000204388	HSPA1B	heat shock protein family A (Hsp70) member 1B [Source:HGNC Symbol;Acc:HGNC:5233]	2.06722399	1.047694717	0	0	yes	up	91.39	97.57	93.02	98.14	196.01	194.32	187.3	193.77	95.03	192.85
ENSG00000130656	HBZ	hemoglobin subunit zeta [Source:HGNC Symbol;Acc:HGNC:4835]	1.809446202	0.855548214	0	0	yes	up	2835.89	2912.94	2834.06	2920.21	5057.4	5306	4951.9	5071.77	2875.775	5096.7675
ENSG00000137193	PIM1	Pim-1 proto-oncogene, serine/threonine kinase [Source:HGNC Symbol;Acc:HGNC:8986]	1.84366866	0.882579401	1.19E-303	1.44E-299	yes	up	209.08	205.36	206.55	223.48	398.55	415.57	401	383.97	211.1175	399.7725
ENSG00000205542	TMSB4X	thymosin beta 4 X-linked [Source:HGNC Symbol;Acc:HGNC:11881]	0.540715562	-0.887058217	1.85E-259	1.87E-255	yes	down	1072.78	1140.62	1142.55	1133.12	595.52	598.94	592.21	584.62	1122.2675	592.8225
ENSG00000135046	ANXA1	annexin A1 [Source:HGNC Symbol;Acc:HGNC:533]	0.558705209	-0.839840824	9.02E-256	7.81E-252	yes	down	489.4	485.16	485.51	475.33	269.34	266.89	263.44	262.89	483.85	265.64
ENSG00000114737	CISH	cytokine inducible SH2 containing protein [Source:HGNC Symbol;Acc:HGNC:1984]	1.93477298	0.952164295	7.81E-235	5.93E-231	yes	up	58.29	60.79	61.37	60.17	113.12	115.81	115.54	114.97	60.155	114.86
ENSG00000059804	SLC2A3	solute carrier family 2 member 3 [Source:HGNC Symbol;Acc:HGNC:11007]	0.501167412	-0.996635488	7.92E-182	5.34E-178	yes	down	45.8	41.95	41.84	43.6	22.85	20.64	20.86	20.86	43.2975	21.3025
ENSG00000265972	TXNIP	thioredoxin interacting protein [Source:HGNC Symbol;Acc:HGNC:16952]	1.642943585	0.716282942	3.85E-175	2.33E-171	yes	up	104.03	102.04	99.71	102.02	164.93	163.48	162.58	158.8	101.95	162.4475
ENSG00000135821	GLUL	glutamate-ammonia ligase [Source:HGNC Symbol;Acc:HGNC:4341]	0.651793639	-0.617512822	5.30E-167	2.92E-163	yes	down	685.28	728.71	771.03	783.96	464.01	468.64	482.99	495.91	742.245	477.8875
ENSG00000172927	MYEOV	myeloma overexpressed [Source:HGNC Symbol;Acc:HGNC:7563]	0.478244233	-1.064180523	3.92E-163	1.98E-159	yes	down	52.01	51.28	52.81	48.99	25.8	25.95	25.22	25.89	51.2725	25.715
ENSG00000259952		novel transcript, antisense to MAZ	0.009919068	-6.655579699	1.61E-152	6.96E-149	yes	down	60.65	41.74	53.11	17.57	0	1.63	0	0	43.2675	0.4075
ENSG00000245532	NEAT1	nuclear paraspeckle assembly transcript 1 [Source:HGNC Symbol;Acc:HGNC:30815]	0.662508969	-0.593988108	4.74E-148	1.92E-144	yes	down	268.28	279.99	274.06	285.24	182.44	173.87	167.79	163.18	276.8925	171.82
ENSG00000214753	HNRNPUL2	heterogeneous nuclear ribonucleoprotein U like 2 [Source:HGNC Symbol;Acc:HGNC:25451]	0.48658617	-1.03923278	2.82E-143	1.07E-139	yes	down	18.51	29.56	19.9	20.99	10.06	14.54	8.36	10.41	22.24	10.8425
ENSG00000178538	CA8	carbonic anhydrase 8 [Source:HGNC Symbol;Acc:HGNC:1382]	0.588877823	-0.763959753	3.82E-121	1.29E-117	yes	down	60.75	65.21	63.05	54.62	31.06	33.94	28.63	28.54	60.9075	30.5425
ENSG00000186395	KRT10	keratin 10 [Source:HGNC Symbol;Acc:HGNC:6413]	0.460515831	-1.118677343	6.70E-120	2.14E-116	yes	down	35.27	44.47	35.6	31.2	16.92	16.18	17.29	15.71	36.635	16.525
ENSG00000179588	ZFPM1	zinc finger protein, FOG family member 1 [Source:HGNC Symbol;Acc:HGNC:19762]	1.97590273	0.982511927	5.01E-113	1.52E-109	yes	up	14.64	15.33	16.2	15.15	25.21	24.5	25.97	28.1	15.33	25.945
ENSG00000130203	APOE	apolipoprotein E [Source:HGNC Symbol;Acc:HGNC:613]	0.559118584	-0.838773797	7.63E-104	1.93E-100	yes	down	125.63	121.02	116.72	115.11	67.49	67.63	63.55	61.68	119.62	65.0875
ENSG00000174358	SLC6A19	solute carrier family 6 member 19 [Source:HGNC Symbol;Acc:HGNC:27960]	1.725967452	0.787405258	1.18E-95	2.86E-92	yes	up	11.51	11.96	12.35	12.26	19.99	21.28	18.9	20.87	12.02	20.26
ENSG00000232931	LINC00342	long intergenic non-protein coding RNA 342 [Source:HGNC Symbol;Acc:HGNC:42470]	1.625237938	0.700650947	1.10E-91	2.58E-88	yes	up	10.47	11.52	12.69	13.16	19.06	18.91	19.74	21.35	11.96	19.765
ENSG00000286122		novel transcript	0.572359467	-0.805006586	1.74E-91	3.90E-88	yes	down	37.02	35.82	35.9	34.54	19.75	19.74	20.56	20.05	35.82	20.025
ENSG00000110324	IL10RA	interleukin 10 receptor subunit alpha [Source:HGNC Symbol;Acc:HGNC:5964]	2.442153958	1.288154153	7.62E-91	1.59E-87	yes	up	4.87	5.61	5.43	5.19	13.88	13.34	13.03	11.67	5.275	12.98
ENSG00000204569	PPP1R10	protein phosphatase 1 regulatory subunit 10 [Source:HGNC Symbol;Acc:HGNC:9284]	1.588960025	0.66808283	4.11E-88	7.79E-85	yes	up	26.38	24.89	25.42	26.24	37.25	35.51	39.98	39.27	25.7325	38.0025
ENSG00000169432	SCN9A	sodium voltage-gated channel alpha subunit 9 [Source:HGNC Symbol;Acc:HGNC:10597]	2.044798751	1.03195886	9.64E-83	1.72E-79	yes	up	4.27	3.48	4.07	4.56	7.85	7.52	7.27	7.39	4.095	7.5075
ENSG00000120738	EGR1	early growth response 1 [Source:HGNC Symbol;Acc:HGNC:3238]	0.603944799	-0.727511402	5.26E-82	8.63E-79	yes	down	37.16	39.84	35.51	35.95	21.58	21.18	22.99	22.24	37.115	21.9975
ENSG00000175602	CCDC85B	coiled-coil domain containing 85B [Source:HGNC Symbol;Acc:HGNC:24926]	0.541182721	-0.885812317	8.15E-79	1.24E-75	yes	down	95.55	94.45	98.64	89.39	63.54	61.29	39.95	35.53	94.5075	50.0775
ENSG00000285245		novel protein	0.001275244	-9.615011448	3.23E-77	4.67E-74	yes	down	2.75	1.78	1.2	1.4	0	0	0	0	1.7825	0
ENSG00000115414	FN1	fibronectin 1 [Source:HGNC Symbol;Acc:HGNC:3778]	2.290134042	1.195432042	9.27E-75	1.31E-71	yes	up	4.08	3.45	4.02	5.9	8.87	9.69	9.7	9.56	4.3625	9.455
ENSG00000052802	MSMO1	methylsterol monooxygenase 1 [Source:HGNC Symbol;Acc:HGNC:10545]	1.689135027	0.75628466	3.27E-74	4.31E-71	yes	up	28.77	27.91	28.08	31.13	47.21	46.98	51.14	47.38	28.9725	48.1775
ENSG00000104936	DMPK	DM1 protein kinase [Source:HGNC Symbol;Acc:HGNC:2933]	1.7867483	0.837336416	7.00E-74	9.03E-71	yes	up	12.85	12.48	13.6	12.21	22.81	21.02	19.51	24.05	12.785	21.8475
ENSG00000271092	TLCD4-RWDD3	TLCD4-RWDD3 readthrough [Source:HGNC Symbol;Acc:HGNC:49388]	1.945105655	0.959848522	9.61E-74	1.21E-70	yes	up	8.31	8.59	9.67	11.57	9.5	15.77	12.29	12.58	9.535	12.535
ENSG00000152078	TLCD4	TLC domain containing 4 [Source:HGNC Symbol;Acc:HGNC:26477]	0.480003973	-1.058881748	4.29E-71	5.20E-68	yes	down	6.62	8.46	7.36	4.86	3.91	2.26	4.63	3.11	6.825	3.4775
ENSG00000141753	IGFBP4	insulin like growth factor binding protein 4 [Source:HGNC Symbol;Acc:HGNC:5473]	0.614175329	-0.703277534	2.60E-69	3.04E-66	yes	down	45.31	49.94	46.79	49.21	28.94	28.86	28.22	29.26	47.8125	28.82
ENSG00000182154	MRPL41	mitochondrial ribosomal protein L41 [Source:HGNC Symbol;Acc:HGNC:14492]	0.616149299	-0.698648123	6.00E-68	6.87E-65	yes	down	293.46	284.44	278.31	283.54	197.13	212.31	139.32	138.4	284.9375	171.79
ENSG00000145113	MUC4	mucin 4, cell surface associated [Source:HGNC Symbol;Acc:HGNC:7514]	1.846227294	0.884580178	3.04E-67	3.36E-64	yes	up	2.14	2.56	2.01	2.28	4.35	5.11	4.86	4.9	2.2475	4.805
ENSG00000245164	LINC00861	long intergenic non-protein coding RNA 861 [Source:HGNC Symbol;Acc:HGNC:45133]	0.604024551	-0.727320904	9.13E-66	9.72E-63	yes	down	19.2	18.69	20.81	21.63	13.88	13.24	12.67	12.42	20.0825	13.0525
ENSG00000129991	TNNI3	troponin I3, cardiac type [Source:HGNC Symbol;Acc:HGNC:11947]	0.427170431	-1.22711631	7.68E-65	8.04E-62	yes	down	60.54	50.29	61.21	52.38	28.45	24.34	25.92	23.66	56.105	25.5925
ENSG00000110092	CCND1	cyclin D1 [Source:HGNC Symbol;Acc:HGNC:1582]	0.638808428	-0.646544747	3.22E-64	3.31E-61	yes	down	28.76	27.53	28.81	27.94	18.05	17.03	16.13	17.53	28.26	17.185
ENSG00000005339	CREBBP	CREB binding protein [Source:HGNC Symbol;Acc:HGNC:2348]	1.506319968	0.591028256	5.49E-62	5.37E-59	yes	up	8.96	11.98	10.66	10.94	14.8	15.14	15.98	13.1	10.635	14.755
ENSG00000130052	STARD8	StAR related lipid transfer domain containing 8 [Source:HGNC Symbol;Acc:HGNC:19161]	0.626493932	-0.674627558	2.07E-61	1.99E-58	yes	down	19.18	17.99	18.81	18.94	11.1	11.46	12.46	11.72	18.73	11.685
ENSG00000130748	TMEM160	transmembrane protein 160 [Source:HGNC Symbol;Acc:HGNC:26042]	0.225174603	-2.150883979	5.01E-61	4.60E-58	yes	down	39.74	44.17	32.44	18.99	9.13	8.54	6.77	5.18	33.835	7.405
ENSG00000146416	AIG1	androgen induced 1 [Source:HGNC Symbol;Acc:HGNC:21607]	0.654454	-0.611636303	2.37E-58	2.15E-55	yes	down	54.04	49.32	51.85	54.82	34.99	34.27	35.53	35.54	52.5075	35.0825
ENSG00000119138	KLF9	Kruppel like factor 9 [Source:HGNC Symbol;Acc:HGNC:1123]	0.552092994	-0.8570168	2.50E-57	2.19E-54	yes	down	10.92	9.55	9.85	10.07	5.87	5.11	5.14	5.78	10.0975	5.475
ENSG00000123411	IKZF4	IKAROS family zinc finger 4 [Source:HGNC Symbol;Acc:HGNC:13179]	1.773681673	0.826747109	2.76E-55	2.33E-52	yes	up	5.76	7.57	6.54	6.57	11.31	10.92	11.46	12.16	6.61	11.4625
ENSG00000213190	MLLT11	MLLT11 transcription factor 7 cofactor [Source:HGNC Symbol;Acc:HGNC:16997]	0.597896478	-0.742032383	5.79E-55	4.81E-52	yes	down	30.45	28.97	31.92	30.21	17.73	18.4	17.8	17.67	30.3875	17.9
ENSG00000140450	ARRDC4	arrestin domain containing 4 [Source:HGNC Symbol;Acc:HGNC:28087]	1.652673231	0.724801501	6.70E-54	5.42E-51	yes	up	9.88	9.81	9.58	9.47	16.38	14.82	15.68	15.31	9.685	15.5475
ENSG00000274333		novel transcript	1.813711642	0.858945103	5.81E-53	4.52E-50	yes	up	16.71	13.73	13.43	22.04	27.23	25.96	17.42	24.6	16.4775	23.8025
ENSG00000138623	SEMA7A	semaphorin 7A (John Milton Hagen blood group) [Source:HGNC Symbol;Acc:HGNC:10741]	2.114403474	1.0802507	6.02E-53	4.62E-50	yes	up	6.72	6.15	6.46	5.18	13.65	10.67	11.08	11.11	6.1275	11.6275
ENSG00000248596		novel transcript	0.664264613	-0.590170034	1.27E-52	9.42E-50	yes	down	18.22	18.85	18.36	19.7	12.55	12.09	12.77	11.41	18.7825	12.205
ENSG00000214049	UCA1	urothelial cancer associated 1 [Source:HGNC Symbol;Acc:HGNC:37126]	0.638079623	-0.648191633	6.06E-52	4.38E-49	yes	down	68.07	72.37	67.45	66.15	42.68	37.36	41.87	42.19	68.51	41.025
ENSG00000270170	NCBP2AS2	NCBP2 antisense 2 (head to head) [Source:HGNC Symbol;Acc:HGNC:25121]	0.497163135	-1.00820877	1.30E-51	9.28E-49	yes	down	57.14	58.73	58.93	43.99	28.44	27.61	26.24	24.21	54.6975	26.625
ENSG00000149639	SOGA1	suppressor of glucose, autophagy associated 1 [Source:HGNC Symbol;Acc:HGNC:16111]	1.566715916	0.647743607	2.12E-51	1.50E-48	yes	up	3.81	3.68	3.88	4.05	5.86	5.51	6.03	6.04	3.855	5.86
ENSG00000249307	LINC01088	long intergenic non-protein coding RNA 1088 [Source:HGNC Symbol;Acc:HGNC:49148]	0.544377437	-0.877320823	5.63E-51	3.88E-48	yes	down	56.25	44.41	44.49	48.3	21.88	22.52	23.85	24.13	48.3625	23.095
ENSG00000143891	GALM	galactose mutarotase [Source:HGNC Symbol;Acc:HGNC:24063]	0.552556037	-0.855807315	7.21E-51	4.91E-48	yes	down	24.37	25.89	25.82	24.25	13.8	14.82	14.95	12.52	25.0825	14.0225
ENSG00000258674		novel protein	2.174038951	1.120377788	9.10E-48	5.75E-45	yes	up	1.96	1.64	2.61	2.39	5.32	4.5	3.7	5.14	2.15	4.665
ENSG00000125968	ID1	inhibitor of DNA binding 1, HLH protein [Source:HGNC Symbol;Acc:HGNC:5360]	0.578196055	-0.790369328	2.79E-47	1.73E-44	yes	down	66.02	65.6	64.23	49.46	36.81	36.02	31.07	32.27	61.3275	34.0425
ENSG00000178980	SELENOW	selenoprotein W [Source:HGNC Symbol;Acc:HGNC:10752]	0.64918114	-0.623307007	9.88E-46	5.82E-43	yes	down	116.23	116.32	131.2	127.89	62.67	60.79	62.67	65.75	122.91	62.97
ENSG00000204592	HLA-E	major histocompatibility complex, class I, E [Source:HGNC Symbol;Acc:HGNC:4962]	0.588435894	-0.765042843	1.98E-45	1.15E-42	yes	down	21.43	23.32	23.19	22.59	12.38	13.73	12.81	12.19	22.6325	12.7775
ENSG00000173267	SNCG	synuclein gamma [Source:HGNC Symbol;Acc:HGNC:11141]	0.63639755	-0.651999812	3.61E-45	2.09E-42	yes	down	122.38	128.57	119.65	120.16	74.74	78.83	75.74	73.92	122.69	75.8075
ENSG00000187017	ESPN	espin [Source:HGNC Symbol;Acc:HGNC:13281]	1.744512865	0.802824237	4.80E-45	2.72E-42	yes	up	11.27	9.65	12.96	11.75	27.14	26.17	26.89	25.99	11.4075	26.5475
ENSG00000260260	SNHG19	small nucleolar RNA host gene 19 [Source:HGNC Symbol;Acc:HGNC:49574]	0.535548369	-0.900911215	5.27E-45	2.96E-42	yes	down	351.45	371.98	379.61	389.47	202.24	195.77	197.26	188.35	373.1275	195.905
ENSG00000273532			0.576631771	-0.794277767	6.15E-45	3.42E-42	yes	down	24.14	20.06	21.08	27.33	11.97	16.22	10.92	13.39	23.1525	13.125
ENSG00000137460	FHDC1	FH2 domain containing 1 [Source:HGNC Symbol;Acc:HGNC:29363]	1.995048934	0.996424133	2.79E-44	1.52E-41	yes	up	2.34	2.07	2.27	2.52	4.78	4.63	4.61	4.03	2.3	4.5125
ENSG00000274536	MIR223HG	MIR223 host gene [Source:HGNC Symbol;Acc:HGNC:54520]	0.585817704	-0.771476302	2.59E-43	1.37E-40	yes	down	30.38	28.63	31.5	29.49	17.78	18.18	16.96	16.31	30	17.3075
ENSG00000130600	H19	H19 imprinted maternally expressed transcript [Source:HGNC Symbol;Acc:HGNC:4713]	0.620332436	-0.688886533	3.27E-43	1.70E-40	yes	down	35.53	36.93	34.41	30.62	25.2	19.11	20.51	22.59	34.3725	21.8525
ENSG00000130755	GMFG	glia maturation factor gamma [Source:HGNC Symbol;Acc:HGNC:4374]	0.384385058	-1.379375838	1.33E-42	6.65E-40	yes	down	43.29	52.58	45.5	52.15	17.27	19.7	19.21	15.34	48.38	17.88
ENSG00000174804	FZD4	frizzled class receptor 4 [Source:HGNC Symbol;Acc:HGNC:4042]	0.661622798	-0.595919148	3.35E-42	1.64E-39	yes	down	9.87	9.75	10.28	10.3	6.55	6.46	6.71	6.41	10.05	6.5325
ENSG00000203618	GP1BB	glycoprotein Ib platelet subunit beta [Source:HGNC Symbol;Acc:HGNC:4440]	0.628843445	-0.669227201	3.61E-42	1.75E-39	yes	down	84.07	116.97	71.66	52.05	57.11	46.76	44.21	50.94	81.1875	49.755
ENSG00000211450	SELENOH	selenoprotein H [Source:HGNC Symbol;Acc:HGNC:18251]	0.62833574	-0.670392451	3.87E-41	1.82E-38	yes	down	69.5	72.28	71.96	70.8	43.04	39.93	44.32	41.3	71.135	42.1475
ENSG00000224877	NDUFAF8	NADH:ubiquinone oxidoreductase complex assembly factor 8 [Source:HGNC Symbol;Acc:HGNC:33551]	0.533944931	-0.905237138	4.95E-41	2.31E-38	yes	down	84.37	155.79	79.18	62.03	66.26	45.66	54.75	55.35	95.3425	55.505
ENSG00000181029	TRAPPC5	trafficking protein particle complex 5 [Source:HGNC Symbol;Acc:HGNC:23067]	0.503040758	-0.991252797	1.95E-40	8.65E-38	yes	down	38.03	39.41	45.36	30.67	38.41	33.13	23.52	26.23	38.3675	30.3225
ENSG00000116016	EPAS1	endothelial PAS domain protein 1 [Source:HGNC Symbol;Acc:HGNC:3374]	1.795876786	0.844688371	3.17E-40	1.38E-37	yes	up	5.28	6.09	4.84	4.86	7.6	8.38	10.17	10.76	5.2675	9.2275
ENSG00000004799	PDK4	pyruvate dehydrogenase kinase 4 [Source:HGNC Symbol;Acc:HGNC:8812]	0.385952819	-1.3735036	7.22E-40	3.06E-37	yes	down	5.16	4.55	4.89	5.66	1.99	1.64	2.03	1.77	5.065	1.8575
ENSG00000101445	PPP1R16B	protein phosphatase 1 regulatory subunit 16B [Source:HGNC Symbol;Acc:HGNC:15850]	0.437165974	-1.193746978	1.62E-39	6.73E-37	yes	down	3.5	3.28	3.01	3.48	1.33	1.62	1.43	1.34	3.3175	1.43
ENSG00000127533	F2RL3	F2R like thrombin or trypsin receptor 3 [Source:HGNC Symbol;Acc:HGNC:3540]	0.599895251	-0.737217485	2.51E-39	1.03E-36	yes	down	14	15.74	14.73	15	8.34	9.34	8.7	8.79	14.8675	8.7925
ENSG00000103254	ANTKMT	adenine nucleotide translocase lysine methyltransferase [Source:HGNC Symbol;Acc:HGNC:14152]	0.654518681	-0.611493725	3.29E-39	1.32E-36	yes	down	90.63	92.85	88.13	89.12	73.43	69.99	55.52	54.54	90.1825	63.37
ENSG00000102786	INTS6	integrator complex subunit 6 [Source:HGNC Symbol;Acc:HGNC:14879]	1.580035651	0.65995711	4.45E-39	1.78E-36	yes	up	7.91	7.01	8.15	7.88	14.39	15.01	12.71	12.35	7.7375	13.615
ENSG00000156206	CFAP161	cilia and flagella associated protein 161 [Source:HGNC Symbol;Acc:HGNC:26782]	0.450522269	-1.150329675	2.35E-38	9.08E-36	yes	down	11.55	11.52	11.01	14.88	6.15	4.85	6.08	3.67	12.24	5.1875
ENSG00000226085	UQCRFS1P1	ubiquinol-cytochrome c reductase, Rieske iron-sulfur polypeptide 1 pseudogene 1 [Source:HGNC Symbol;Acc:HGNC:12588]	0.205593812	-2.282131253	2.21E-36	8.13E-34	yes	down	15.79	15.23	15.32	5.48	3.32	4.63	1.38	1.06	12.955	2.5975
ENSG00000107242	PIP5K1B	phosphatidylinositol-4-phosphate 5-kinase type 1 beta [Source:HGNC Symbol;Acc:HGNC:8995]	0.636600188	-0.651540513	3.69E-36	1.32E-33	yes	down	20.95	20.87	19.5	19.96	13.75	12.45	13.64	13.33	20.32	13.2925
ENSG00000196154	S100A4	S100 calcium binding protein A4 [Source:HGNC Symbol;Acc:HGNC:10494]	0.541339987	-0.885393136	1.18E-35	4.14E-33	yes	down	95.72	94.97	109.19	94.72	54.89	53.68	50.91	44.94	98.65	51.105
ENSG00000113739	STC2	stanniocalcin 2 [Source:HGNC Symbol;Acc:HGNC:11374]	0.524161862	-0.931915708	2.59E-35	8.87E-33	yes	down	8.33	8.74	8.12	10.04	4.17	5.22	3.71	5.07	8.8075	4.5425
ENSG00000197587	DMBX1	diencephalon/mesencephalon homeobox 1 [Source:HGNC Symbol;Acc:HGNC:19026]	1.855633983	0.891912172	3.34E-35	1.12E-32	yes	up	3.37	3.24	2.98	2.55	5.39	5.8	5.3	5.82	3.035	5.5775
ENSG00000281852	LINC00891	long intergenic non-protein coding RNA 891 [Source:HGNC Symbol;Acc:HGNC:48577]	0.550642794	-0.860811359	5.24E-35	1.75E-32	yes	down	6.67	7.96	7.5	8.15	4.47	3.82	3.9	4.18	7.57	4.0925
ENSG00000185201	IFITM2	interferon induced transmembrane protein 2 [Source:HGNC Symbol;Acc:HGNC:5413]	0.657701892	-0.604494274	6.28E-35	2.07E-32	yes	down	129.16	168.69	129.03	160.68	99.71	80.01	86.62	88.74	146.89	88.77
ENSG00000151012	SLC7A11	solute carrier family 7 member 11 [Source:HGNC Symbol;Acc:HGNC:11059]	0.61051805	-0.711894147	6.28E-35	2.06E-32	yes	down	4.34	4.25	5.16	4.7	2.84	2.57	2.98	2.79	4.6125	2.795
ENSG00000127507	ADGRE2	adhesion G protein-coupled receptor E2 [Source:HGNC Symbol;Acc:HGNC:3337]	0.600552443	-0.73563786	9.26E-35	3.00E-32	yes	down	10.64	8.59	10	10.41	4.7	5.56	4.42	6.37	9.91	5.2625
ENSG00000169047	IRS1	insulin receptor substrate 1 [Source:HGNC Symbol;Acc:HGNC:6125]	2.621346684	1.390308169	2.21E-34	7.02E-32	yes	up	0.47	0.7	0.51	0.52	1.5	1.88	1.6	2.31	0.55	1.8225
ENSG00000281490	CICP14	capicua transcriptional repressor pseudogene 14 [Source:HGNC Symbol;Acc:HGNC:38542]	2.481720297	1.311340525	4.73E-34	1.47E-31	yes	up	2.33	2.06	2.53	2.61	6.43	5.67	6.15	5.02	2.3825	5.8175
ENSG00000251056	ANKRD20A17P	ankyrin repeat domain 20 family member A17, pseudogene [Source:HGNC Symbol;Acc:HGNC:43608]	1.678052588	0.746787928	6.74E-34	2.06E-31	yes	up	4.43	4.8	4.72	4.02	7.78	6.83	7.53	6.77	4.4925	7.2275
ENSG00000167106	FAM102A	family with sequence similarity 102 member A [Source:HGNC Symbol;Acc:HGNC:31419]	1.815225421	0.860148718	2.66E-33	7.96E-31	yes	up	5.74	5.42	5.09	7.85	9.14	12.34	11.82	11.45	6.025	11.1875
ENSG00000026297	RNASET2	ribonuclease T2 [Source:HGNC Symbol;Acc:HGNC:21686]	0.651522781	-0.618112471	6.06E-33	1.79E-30	yes	down	59.25	51.25	52.96	51.46	35.4	34.84	33.82	32.04	53.73	34.025
ENSG00000243449	C4orf48	chromosome 4 open reading frame 48 [Source:HGNC Symbol;Acc:HGNC:34437]	0.21667054	-2.206425089	1.26E-32	3.69E-30	yes	down	30.89	81.91	34.41	12.08	8.33	11.82	5.11	8.57	39.8225	8.4575
ENSG00000172349	IL16	interleukin 16 [Source:HGNC Symbol;Acc:HGNC:5980]	0.595530787	-0.747752002	1.93E-32	5.62E-30	yes	down	12.05	12.01	11.83	11.49	5.92	5.87	6.45	6.13	11.845	6.0925
ENSG00000185432	METTL7A	methyltransferase like 7A [Source:HGNC Symbol;Acc:HGNC:24550]	0.659336861	-0.600912356	2.94E-32	8.45E-30	yes	down	21.16	19.32	21.08	20.45	14.05	13.06	12.76	12.76	20.5025	13.1575
ENSG00000161180	CCDC116	coiled-coil domain containing 116 [Source:HGNC Symbol;Acc:HGNC:26688]	0.481875333	-1.053268143	6.63E-32	1.87E-29	yes	down	9.69	9.38	11.53	11.19	5.69	4.95	4.85	3.64	10.4475	4.7825
ENSG00000100336	APOL4	apolipoprotein L4 [Source:HGNC Symbol;Acc:HGNC:14867]	1.642878511	0.716225798	1.77E-31	4.87E-29	yes	up	7.26	7.88	9.27	7.89	12.94	12.18	12.11	12.76	8.075	12.4975
ENSG00000143878	RHOB	ras homolog family member B [Source:HGNC Symbol;Acc:HGNC:668]	0.531681067	-0.911367003	1.80E-31	4.92E-29	yes	down	11.62	11.98	11.6	10.34	5.37	6.98	6.2	5.2	11.385	5.9375
ENSG00000285565		novel transcript	1.559544233	0.641124472	3.05E-31	8.24E-29	yes	up	11.59	21.07	16.84	13.48	18.76	29.24	20.61	18.64	15.745	21.8125
ENSG00000254870	ATP6V1G2-DDX39B	ATP6V1G2-DDX39B readthrough (NMD candidate) [Source:HGNC Symbol;Acc:HGNC:41999]	1.868613866	0.901968479	4.08E-31	1.09E-28	yes	up	3.6	5.89	6.13	6.39	10.37	6.65	9.2	7.89	5.5025	8.5275
ENSG00000257704	INAFM1	InaF motif containing 1 [Source:HGNC Symbol;Acc:HGNC:27406]	0.249064729	-2.005407365	1.06E-30	2.78E-28	yes	down	13.16	17.13	12.85	7	4	1.65	2.13	4.39	12.535	3.0425
ENSG00000279081		eukaryotic translation initiation factor 3 subunit F (EIF3F) pseudogene	1.537854879	0.620919369	1.23E-30	3.21E-28	yes	up	2.32	2.93	3.11	2.43	4.52	4.96	3.81	4.4	2.6975	4.4225
ENSG00000282988		novel protein	1.545874884	0.628423559	3.87E-30	9.94E-28	yes	up	17.9	17.23	11.2	11.85	18.94	18.32	14.91	15.56	14.545	16.9325
ENSG00000263244		novel transcript, 3' overlapping chromosome 16 open reading frame 72	0.665761425	-0.586922813	4.47E-30	1.15E-27	yes	down	5.88	5.84	5.82	7.1	2.97	4.25	4.07	4.87	6.16	4.04
ENSG00000232265	LINC02805	long intergenic non-protein coding RNA 2805 [Source:HGNC Symbol;Acc:HGNC:54339]	0.6461452	-0.630069694	4.88E-30	1.24E-27	yes	down	30.77	28.48	30.06	29.66	18.54	17.14	20.68	20.22	29.7425	19.145
ENSG00000140948	ZCCHC14	zinc finger CCHC-type containing 14 [Source:HGNC Symbol;Acc:HGNC:24134]	1.516849528	0.601077977	8.59E-30	2.14E-27	yes	up	5.91	5.96	5.17	4.92	8.42	7.46	7.04	6.8	5.49	7.43
ENSG00000286140	DERPC	DERPC proline and glycine rich nuclear protein [Source:HGNC Symbol;Acc:HGNC:54084]	1.562689305	0.644030969	9.72E-30	2.41E-27	yes	up	12.82	9.26	12.13	8.12	19.14	15.18	16.04	14.69	10.5825	16.2625
ENSG00000260924	LINC01311	long intergenic non-protein coding RNA 1311 [Source:HGNC Symbol;Acc:HGNC:50503]	0.579466968	-0.787201671	4.81E-29	1.14E-26	yes	down	22.96	25.32	22.89	23.34	14.1	13.55	13.72	12.26	23.6275	13.4075
ENSG00000277462	ZNF670	zinc finger protein 670 [Source:HGNC Symbol;Acc:HGNC:28167]	0.60236257	-0.73129597	5.74E-29	1.36E-26	yes	down	7.74	8.03	7.89	8.54	5.16	5.01	4.76	4.08	8.05	4.7525
ENSG00000185220	PGBD2	piggyBac transposable element derived 2 [Source:HGNC Symbol;Acc:HGNC:19399]	1.527183391	0.610873318	6.69E-29	1.57E-26	yes	up	10.64	11.49	9.55	9.77	17.55	15.9	15.13	15.38	10.3625	15.99
ENSG00000162004	CCDC78	coiled-coil domain containing 78 [Source:HGNC Symbol;Acc:HGNC:14153]	1.885948321	0.915290144	6.88E-29	1.61E-26	yes	up	6.33	8.2	5.26	6.28	10.5	8.82	13.08	10.25	6.5175	10.6625
ENSG00000286016		novel transcript	0.665197013	-0.588146405	8.75E-29	2.03E-26	yes	down	5.49	5.9	5.08	5.3	3.68	3.24	3.57	3.78	5.4425	3.5675
ENSG00000234147		novel transcript	0.630713991	-0.664942159	2.42E-28	5.45E-26	yes	down	34.04	31.23	32.7	35.21	24.3	22.47	19.23	18.92	33.295	21.23
ENSG00000160219	GAB3	GRB2 associated binding protein 3 [Source:HGNC Symbol;Acc:HGNC:17515]	0.652658869	-0.615598972	1.10E-27	2.40E-25	yes	down	11.67	11.14	11.62	10.49	7.35	6.47	7.07	7.81	11.23	7.175
ENSG00000147324	MFHAS1	malignant fibrous histiocytoma amplified sequence 1 [Source:HGNC Symbol;Acc:HGNC:16982]	1.518240684	0.602400517	1.19E-27	2.58E-25	yes	up	5.42	5.58	7.8	7.43	12.11	11.17	10.97	11.05	6.5575	11.325
ENSG00000065361	ERBB3	erb-b2 receptor tyrosine kinase 3 [Source:HGNC Symbol;Acc:HGNC:3431]	0.400300022	-1.320846399	1.30E-27	2.80E-25	yes	down	3.3	3.52	3.61	3.74	1.46	1.63	2.55	1.19	3.5425	1.7075
ENSG00000261067		novel transcript	2.01343907	1.009661815	2.14E-27	4.53E-25	yes	up	4.72	1.77	6.04	3.43	8.1	10.32	8.6	6.12	3.99	8.285
ENSG00000145990	GFOD1	glucose-fructose oxidoreductase domain containing 1 [Source:HGNC Symbol;Acc:HGNC:21096]	0.619896328	-0.689901137	4.18E-27	8.69E-25	yes	down	5.72	5.06	5.17	5.99	3.58	3.2	3.93	3.41	5.485	3.53
ENSG00000267321	SNHG30	small nucleolar RNA host gene 30 [Source:HGNC Symbol;Acc:HGNC:52836]	0.656606866	-0.606898259	6.05E-27	1.25E-24	yes	down	40.76	41.16	39.78	37.11	24.78	26.69	27.54	23.12	39.7025	25.5325
ENSG00000150961	SEC24D	SEC24 homolog D, COPII coat complex component [Source:HGNC Symbol;Acc:HGNC:10706]	0.622061953	-0.684869824	6.69E-27	1.37E-24	yes	down	9.07	9.29	9.18	9.89	5.86	6.18	5.52	6.02	9.3575	5.895
ENSG00000234608	MAPKAPK5-AS1	MAPKAPK5 antisense RNA 1 [Source:HGNC Symbol;Acc:HGNC:24091]	0.66079698	-0.597721001	9.40E-27	1.91E-24	yes	down	48.27	45.37	53.31	46.31	34.06	36.41	31.22	36.9	48.315	34.6475
ENSG00000250722	SELENOP	selenoprotein P [Source:HGNC Symbol;Acc:HGNC:10751]	0.59940194	-0.738404342	1.21E-26	2.43E-24	yes	down	16.54	14.55	16.48	17.55	10.96	9.16	11.08	9.21	16.28	10.1025
ENSG00000105327	BBC3	BCL2 binding component 3 [Source:HGNC Symbol;Acc:HGNC:17868]	0.474617558	-1.075162621	1.25E-26	2.50E-24	yes	down	12.35	15.49	12.4	12.44	7.43	6.33	4.91	6.47	13.17	6.285
ENSG00000167705	RILP	Rab interacting lysosomal protein [Source:HGNC Symbol;Acc:HGNC:30266]	0.574314943	-0.800085996	1.62E-26	3.24E-24	yes	down	19.84	23.44	21.07	17.49	11.37	14.82	11.17	14.19	20.46	12.8875
ENSG00000196502	SULT1A1	sulfotransferase family 1A member 1 [Source:HGNC Symbol;Acc:HGNC:11453]	0.661005536	-0.59726574	1.72E-26	3.42E-24	yes	down	42.57	41.1	44.12	38.83	28.28	27.08	25.19	29.48	41.655	27.5075
ENSG00000213178	RPL22P1	ribosomal protein L22 pseudogene 1 [Source:HGNC Symbol;Acc:HGNC:17998]	3.430860126	1.778570309	2.48E-26	4.91E-24	yes	up	36.24	0	0.03	19.8	71.24	34.06	36.82	41.85	14.0175	45.9925
ENSG00000249319		novel protein	1.765505878	0.820081624	3.80E-26	7.43E-24	yes	up	3.13	1.38	1.81	2.76	7.58	7.06	4.81	8.08	2.27	6.8825
ENSG00000143199	ADCY10	adenylate cyclase 10 [Source:HGNC Symbol;Acc:HGNC:21285]	0.665941194	-0.586533308	4.94E-26	9.64E-24	yes	down	2.72	2.76	2.75	2.64	1.89	2.73	2.22	2.13	2.7175	2.2425
ENSG00000139428	MMAB	metabolism of cobalamin associated B [Source:HGNC Symbol;Acc:HGNC:19331]	1.512688065	0.597114517	6.08E-26	1.18E-23	yes	up	30	26.67	34.86	33.57	49.24	46.74	50.35	48.83	31.275	48.79
ENSG00000181649	PHLDA2	pleckstrin homology like domain family A member 2 [Source:HGNC Symbol;Acc:HGNC:12385]	0.453699767	-1.140190176	8.80E-26	1.69E-23	yes	down	21.4	20.18	21.84	19.52	9.06	9.76	9.48	8.58	20.735	9.22
ENSG00000161243	FBXO27	F-box protein 27 [Source:HGNC Symbol;Acc:HGNC:18753]	0.526806205	-0.924655756	3.33E-25	6.12E-23	yes	down	12.24	11.61	17.7	12.05	5.12	8.86	7.94	5.34	13.4	6.815
ENSG00000204519	ZNF551	zinc finger protein 551 [Source:HGNC Symbol;Acc:HGNC:25108]	0.631039303	-0.664198231	1.12E-24	1.96E-22	yes	down	9.42	9.77	7.98	10.53	7.06	4.33	5.64	5.74	9.425	5.6925
ENSG00000280064		novel transcript	1.582019244	0.661767149	1.57E-24	2.71E-22	yes	up	9.02	9.58	9.56	9.51	15.64	12.39	15.34	15.17	9.4175	14.635
ENSG00000115935	WIPF1	WAS/WASL interacting protein family member 1 [Source:HGNC Symbol;Acc:HGNC:12736]	0.647402973	-0.627264105	3.36E-24	5.69E-22	yes	down	10.19	11.56	10.9	10.56	6.59	6.9	6.49	8.13	10.8025	7.0275
ENSG00000273344	PAXIP1-DT	PAXIP1 divergent transcript [Source:HGNC Symbol;Acc:HGNC:27328]	0.655862871	-0.60853389	6.26E-24	1.04E-21	yes	down	18.98	19.72	17.28	18.65	12.96	12.2	10.86	11.93	18.6575	11.9875
ENSG00000177943	MAMDC4	MAM domain containing 4 [Source:HGNC Symbol;Acc:HGNC:24083]	1.500597989	0.58553753	8.04E-24	1.32E-21	yes	up	3.61	2.71	3.08	4.52	4.46	5.23	5.86	4.5	3.48	5.0125
ENSG00000188643	S100A16	S100 calcium binding protein A16 [Source:HGNC Symbol;Acc:HGNC:20441]	0.540740147	-0.886992622	1.07E-23	1.72E-21	yes	down	24.45	20.2	21.58	20.95	11.51	11.06	12.28	11.86	21.795	11.6775
ENSG00000258529		novel protein	5.978204447	2.579712236	1.43E-23	2.28E-21	yes	up	0	0	0.1	15.16	1.53	1.12	0	4.5	3.815	1.7875
ENSG00000076706	MCAM	melanoma cell adhesion molecule [Source:HGNC Symbol;Acc:HGNC:6934]	0.661295926	-0.596632082	3.84E-23	6.04E-21	yes	down	13.6	13.5	12	13.15	10.11	9.48	7.72	8.07	13.0625	8.845
ENSG00000160813	PPP1R35	protein phosphatase 1 regulatory subunit 35 [Source:HGNC Symbol;Acc:HGNC:28320]	0.601494101	-0.733377507	4.29E-23	6.72E-21	yes	down	37.75	40.51	39.59	43.15	25.01	27.96	23.26	26.71	40.25	25.735
ENSG00000234771	SLC25A25-AS1	SLC25A25 antisense RNA 1 [Source:HGNC Symbol;Acc:HGNC:27844]	1.617745883	0.693985005	5.40E-23	8.42E-21	yes	up	4.14	4.19	4.48	4.29	7.73	7.52	6.57	6.55	4.275	7.0925
ENSG00000118515	SGK1	serum/glucocorticoid regulated kinase 1 [Source:HGNC Symbol;Acc:HGNC:10810]	2.032444427	1.023215905	6.43E-23	1.00E-20	yes	up	3.15	4.01	3.81	4.52	7.19	8.01	8.86	7.86	3.8725	7.98
ENSG00000271254			1.622366043	0.698099362	2.40E-22	3.62E-20	yes	up	5.16	5.53	4.74	5.2	7.93	7.64	9.51	7.68	5.1575	8.19
ENSG00000070540	WIPI1	WD repeat domain, phosphoinositide interacting 1 [Source:HGNC Symbol;Acc:HGNC:25471]	0.567993638	-0.816053325	2.59E-22	3.90E-20	yes	down	12.81	14.36	15.12	15.85	8.07	7.24	7.26	6.95	14.535	7.38
ENSG00000179364	PACS2	phosphofurin acidic cluster sorting protein 2 [Source:HGNC Symbol;Acc:HGNC:23794]	1.628859957	0.703862572	2.85E-22	4.24E-20	yes	up	9.17	7.96	8.16	8.41	11.88	13.58	10.33	11.9	8.425	11.9225
ENSG00000115594	IL1R1	interleukin 1 receptor type 1 [Source:HGNC Symbol;Acc:HGNC:5993]	1.870858642	0.903700556	6.58E-22	9.54E-20	yes	up	2.39	2.83	2.64	2.06	3.9	3.88	3.83	3.84	2.48	3.8625
ENSG00000173262	SLC2A14	solute carrier family 2 member 14 [Source:HGNC Symbol;Acc:HGNC:18301]	0.53378425	-0.905671359	6.85E-22	9.91E-20	yes	down	17.16	20.72	17.47	18	9.21	11.27	9.12	8.67	18.3375	9.5675
ENSG00000129226	CD68	CD68 molecule [Source:HGNC Symbol;Acc:HGNC:1693]	0.65454003	-0.611446668	1.10E-21	1.58E-19	yes	down	21.86	23.25	22.51	21.6	15.64	14.13	14.45	13.99	22.305	14.5525
ENSG00000115266	APC2	APC regulator of WNT signaling pathway 2 [Source:HGNC Symbol;Acc:HGNC:24036]	1.792386148	0.841881482	1.82E-21	2.58E-19	yes	up	2.26	2.55	2.34	2.59	4.63	4.03	4.62	4.18	2.435	4.365
ENSG00000245149	RNF139-AS1	RNF139 antisense RNA 1 (head to head) [Source:HGNC Symbol;Acc:HGNC:48940]	0.587598817	-0.767096605	2.73E-21	3.79E-19	yes	down	12.62	12.9	12.84	15.05	7.45	7.63	7.37	7.68	13.3525	7.5325
ENSG00000169548	ZNF280A	zinc finger protein 280A [Source:HGNC Symbol;Acc:HGNC:18597]	0.601473103	-0.733427871	2.74E-21	3.80E-19	yes	down	10.58	10.18	10.96	10.19	6.98	6.55	5.51	5.9	10.4775	6.235
ENSG00000181104	F2R	coagulation factor II thrombin receptor [Source:HGNC Symbol;Acc:HGNC:3537]	0.634838596	-0.655538254	3.62E-21	4.96E-19	yes	down	8.48	9.96	8.19	8.03	5.54	5.19	4.66	4.7	8.665	5.0225
ENSG00000280164		novel transcript	0.159586226	-2.647591958	1.01E-20	1.34E-18	yes	down	5.31	4.49	2.97	4.3	0	0.79	1.32	0.52	4.2675	0.6575
ENSG00000271856	LINC01215	long intergenic non-protein coding RNA 1215 [Source:HGNC Symbol;Acc:HGNC:49651]	0.624513004	-0.679196482	1.83E-20	2.39E-18	yes	down	9.94	10	10.13	10.69	6.57	5.91	5.8	6.72	10.19	6.25
ENSG00000262049		novel transcript, antisense to HGS	0.035289334	-4.824623992	2.19E-20	2.82E-18	yes	down	1.98	0.42	0.77	0.94	0	0	0.12	0	1.0275	0.03
ENSG00000136244	IL6	interleukin 6 [Source:HGNC Symbol;Acc:HGNC:6018]	6.970123021	2.80118412	7.76E-20	9.56E-18	yes	up	0.77	0.37	0.77	0.55	4.25	4.2	3.61	3.17	0.615	3.8075
ENSG00000132005	RFX1	regulatory factor X1 [Source:HGNC Symbol;Acc:HGNC:9982]	1.508965058	0.593559399	8.56E-20	1.05E-17	yes	up	4.89	4.9	4.93	10.39	15.92	7.6	6.15	8.32	6.2775	9.4975
ENSG00000158887	MPZ	myelin protein zero [Source:HGNC Symbol;Acc:HGNC:7225]	0.498534811	-1.004233849	8.57E-20	1.04E-17	yes	down	11.02	10.65	11.4	12	5.53	5.15	6.31	5.92	11.2675	5.7275
ENSG00000095596	CYP26A1	cytochrome P450 family 26 subfamily A member 1 [Source:HGNC Symbol;Acc:HGNC:2603]	0.534100089	-0.904817971	1.47E-19	1.76E-17	yes	down	8.36	11.86	10.67	10.61	6.74	4.85	6.02	5.27	10.375	5.72
ENSG00000066336	SPI1	Spi-1 proto-oncogene [Source:HGNC Symbol;Acc:HGNC:11241]	0.582593149	-0.779439359	1.74E-19	2.07E-17	yes	down	10.05	10.03	9.74	10.28	7.09	4.75	6.21	6.5	10.025	6.1375
ENSG00000260643		novel protein	0.449262248	-1.154370258	2.40E-19	2.79E-17	yes	down	11.73	14.34	10.24	8.18	5.94	3.25	4.84	3.69	11.1225	4.43
ENSG00000183346	CABCOCO1	ciliary associated calcium binding coiled-coil 1 [Source:HGNC Symbol;Acc:HGNC:28678]	0.641025276	-0.641546851	2.64E-19	3.05E-17	yes	down	4.8	4.6	4.46	4.62	3.11	2.62	3.12	2.69	4.62	2.885
ENSG00000167641	PPP1R14A	protein phosphatase 1 regulatory inhibitor subunit 14A [Source:HGNC Symbol;Acc:HGNC:14871]	0.603253699	-0.729163238	4.01E-19	4.58E-17	yes	down	60.62	63.19	54.55	58.56	40.99	37.65	31.89	39.82	59.23	37.5875
ENSG00000171843	MLLT3	MLLT3 super elongation complex subunit [Source:HGNC Symbol;Acc:HGNC:7136]	0.620612999	-0.688234179	4.05E-19	4.62E-17	yes	down	42.66	37.87	36.97	33.66	19.01	22.23	21.13	24.91	37.79	21.82
ENSG00000204711	C9orf135	chromosome 9 open reading frame 135 [Source:HGNC Symbol;Acc:HGNC:31422]	0.388862445	-1.362668183	4.08E-19	4.64E-17	yes	down	17.92	16.31	19.25	16.95	5.65	6.54	7.37	6.89	17.6075	6.6125
ENSG00000134369	NAV1	neuron navigator 1 [Source:HGNC Symbol;Acc:HGNC:15989]	0.52465477	-0.930559673	4.24E-19	4.79E-17	yes	down	1.05	2	1.56	1.91	0.65	1.03	1.02	0.99	1.63	0.9225
ENSG00000008196	TFAP2B	transcription factor AP-2 beta [Source:HGNC Symbol;Acc:HGNC:11743]	1.638156814	0.712073467	4.44E-19	5.00E-17	yes	up	4.81	5.7	4.54	4.27	7.41	6.98	7.27	7.06	4.83	7.18
ENSG00000136720	HS6ST1	heparan sulfate 6-O-sulfotransferase 1 [Source:HGNC Symbol;Acc:HGNC:5201]	1.568144472	0.64905848	4.77E-19	5.35E-17	yes	up	4.12	4.24	4.23	4.13	6.82	5.92	6.62	5.96	4.18	6.33
ENSG00000110876	SELPLG	selectin P ligand [Source:HGNC Symbol;Acc:HGNC:10722]	0.568911817	-0.813723046	5.04E-19	5.64E-17	yes	down	7.34	7.21	7.89	7.31	4.35	4.08	3.81	4.33	7.4375	4.1425
ENSG00000133243	BTBD2	BTB domain containing 2 [Source:HGNC Symbol;Acc:HGNC:15504]	1.546122351	0.62865449	8.27E-19	9.04E-17	yes	up	10.83	16.13	12.87	9.93	24.98	14.27	14.13	17.78	12.44	17.79
ENSG00000140993	TIGD7	tigger transposable element derived 7 [Source:HGNC Symbol;Acc:HGNC:18331]	0.653279951	-0.61422673	1.17E-18	1.27E-16	yes	down	10.71	10.15	11.66	11.88	7.52	6.75	6.61	7.02	11.1	6.975
ENSG00000147912	FBXO10	F-box protein 10 [Source:HGNC Symbol;Acc:HGNC:13589]	1.72267778	0.784652877	1.18E-18	1.28E-16	yes	up	2.6	2.72	2.2	2.82	4.49	4.36	4.11	3.96	2.585	4.23
ENSG00000249992	TMEM158	transmembrane protein 158 [Source:HGNC Symbol;Acc:HGNC:30293]	1.914280687	0.936802385	1.90E-18	2.03E-16	yes	up	5.05	6.72	8.02	4.52	11.3	9.96	9.21	10.74	6.0775	10.3025
ENSG00000125730	C3	complement C3 [Source:HGNC Symbol;Acc:HGNC:1318]	0.423839625	-1.238409622	2.21E-18	2.34E-16	yes	down	4.22	3.01	4.16	3	1.39	1.84	1.18	2.03	3.5975	1.61
ENSG00000139793	MBNL2	muscleblind like splicing regulator 2 [Source:HGNC Symbol;Acc:HGNC:16746]	0.641067709	-0.641451354	4.54E-18	4.66E-16	yes	down	5.35	5.07	5.55	6.12	4.23	4.45	3.36	3.2	5.5225	3.81
ENSG00000263235		novel transcript, sense overlapping TRAP1	167.5377093	7.388342043	1.11E-17	1.10E-15	yes	up	0	0	0	0	1.24	0.43	1.66	2.64	0	1.4925
ENSG00000120256	LRP11	LDL receptor related protein 11 [Source:HGNC Symbol;Acc:HGNC:16936]	0.441008184	-1.181122667	1.49E-17	1.47E-15	yes	down	2.95	4.61	2.56	1.02	1.65	3.07	1.17	3.69	2.785	2.395
ENSG00000244274	DBNDD2	dysbindin domain containing 2 [Source:HGNC Symbol;Acc:HGNC:15881]	0.665048329	-0.588468911	1.80E-17	1.76E-15	yes	down	35.43	30.01	33.53	27.57	22.03	21.52	21.61	18.38	31.635	20.885
ENSG00000153071	DAB2	DAB adaptor protein 2 [Source:HGNC Symbol;Acc:HGNC:2662]	0.618339828	-0.693528161	2.03E-17	1.98E-15	yes	down	5.93	9.15	5.95	6.27	4.23	4.45	3.49	4.47	6.825	4.16
ENSG00000162772	ATF3	activating transcription factor 3 [Source:HGNC Symbol;Acc:HGNC:785]	0.50952709	-0.972769243	3.18E-17	3.06E-15	yes	down	8.29	8.34	8.32	7.73	3.22	3.45	5.13	4.36	8.17	4.04
ENSG00000225663	MCRIP1	MAPK regulated corepressor interacting protein 1 [Source:HGNC Symbol;Acc:HGNC:28007]	1.500813449	0.585744661	3.20E-17	3.07E-15	yes	up	18.53	18.33	20.24	18.37	26.56	27.55	30.15	24.93	18.8675	27.2975
ENSG00000163297	ANTXR2	ANTXR cell adhesion molecule 2 [Source:HGNC Symbol;Acc:HGNC:21732]	0.653708056	-0.613281619	3.65E-17	3.49E-15	yes	down	6.5	6.99	6.85	7.15	4.39	4.82	4.35	4.13	6.8725	4.4225
ENSG00000129951	PLPPR3	phospholipid phosphatase related 3 [Source:HGNC Symbol;Acc:HGNC:23497]	0.640902398	-0.641823428	3.71E-17	3.55E-15	yes	down	11.85	14.19	11.53	10.26	7.62	7.67	7.81	6.24	11.9575	7.335
ENSG00000151651	ADAM8	ADAM metallopeptidase domain 8 [Source:HGNC Symbol;Acc:HGNC:215]	0.531951337	-0.910633822	4.76E-17	4.51E-15	yes	down	5.65	5.22	8.12	5.8	3.04	3.63	2.45	3.68	6.1975	3.2
ENSG00000276612		novel protein	1.518041547	0.602211276	5.11E-17	4.83E-15	yes	up	4.85	5.51	4.71	6.44	7.75	7.47	10.74	8.36	5.3775	8.58
ENSG00000273230		novel transcript	2.589172782	1.372491243	6.07E-17	5.71E-15	yes	up	0.91	0.9	0.98	0.94	2.65	2.41	2.21	2.25	0.9325	2.38
ENSG00000244165	P2RY11	purinergic receptor P2Y11 [Source:HGNC Symbol;Acc:HGNC:8540]	2.09254723	1.065260186	1.09E-16	1.01E-14	yes	up	5.35	6	5.04	6.66	10.05	13.15	9.47	11.65	5.7625	11.08
ENSG00000174938	SEZ6L2	seizure related 6 homolog like 2 [Source:HGNC Symbol;Acc:HGNC:30844]	0.468481172	-1.093937027	1.16E-16	1.06E-14	yes	down	3.55	3.2	3.31	3.51	1.49	1.7	1.49	1.47	3.3925	1.5375
ENSG00000172216	CEBPB	CCAAT enhancer binding protein beta [Source:HGNC Symbol;Acc:HGNC:1834]	0.568387397	-0.815053529	1.80E-16	1.63E-14	yes	down	8.63	12.94	9.24	6.7	6.09	4.72	5.28	4.74	9.3775	5.2075
ENSG00000163328	GPR155	G protein-coupled receptor 155 [Source:HGNC Symbol;Acc:HGNC:22951]	0.648036264	-0.625853545	3.16E-16	2.80E-14	yes	down	5.02	7.45	4.85	7.13	5.77	2.93	4.19	2.69	6.1125	3.895
ENSG00000145832	SLC25A48	solute carrier family 25 member 48 [Source:HGNC Symbol;Acc:HGNC:30451]	0.351895527	-1.506780919	3.58E-16	3.15E-14	yes	down	21.44	17.88	21.14	19.69	5.87	4.7	9.37	7.69	20.0375	6.9075
ENSG00000228742	LINC02577	long intergenic non-protein coding RNA 2577 [Source:HGNC Symbol;Acc:HGNC:53749]	0.586361754	-0.770137089	3.80E-16	3.33E-14	yes	down	5.87	6.61	6.25	6.72	3.28	3.6	3.39	3.41	6.3625	3.42
ENSG00000185022	MAFF	MAF bZIP transcription factor F [Source:HGNC Symbol;Acc:HGNC:6780]	0.511399538	-0.967477239	6.23E-16	5.36E-14	yes	down	4.92	5.61	5.25	4.92	2.78	2.99	2.19	2.53	5.175	2.6225
ENSG00000142197	DOP1B	DOP1 leucine zipper like protein B [Source:HGNC Symbol;Acc:HGNC:1291]	1.772779467	0.826013077	6.30E-16	5.41E-14	yes	up	1.05	0.99	1.08	1.19	1.91	1.83	2.13	1.96	1.0775	1.9575
ENSG00000274628		novel cytochrome P450 family pseudogene	3.399232497	1.765209041	6.38E-16	5.47E-14	yes	up	2.47	0.26	1	1.06	1.71	2.69	3.6	2.27	1.1975	2.5675
ENSG00000213654	GPSM3	G protein signaling modulator 3 [Source:HGNC Symbol;Acc:HGNC:13945]	0.59528964	-0.748336308	7.59E-16	6.46E-14	yes	down	14.92	17.36	17.27	15.08	10.01	9.75	8.21	10.08	16.1575	9.5125
ENSG00000119547	ONECUT2	one cut homeobox 2 [Source:HGNC Symbol;Acc:HGNC:8139]	1.608470728	0.685689681	9.54E-16	8.08E-14	yes	up	0.74	0.8	0.74	0.67	1.19	0.94	1.25	1.27	0.7375	1.1625
ENSG00000261371	PECAM1	platelet and endothelial cell adhesion molecule 1 [Source:HGNC Symbol;Acc:HGNC:8823]	0.559755439	-0.837131453	1.02E-15	8.65E-14	yes	down	1.89	2.15	2.9	3.01	1.13	1.73	1.47	2.19	2.4875	1.63
ENSG00000261526		novel transcript	0.611132684	-0.710442456	1.09E-15	9.18E-14	yes	down	17.86	18.35	17.11	15.46	9.42	9.94	11.18	10.67	17.195	10.3025
ENSG00000184557	SOCS3	suppressor of cytokine signaling 3 [Source:HGNC Symbol;Acc:HGNC:19391]	1.521201005	0.605210797	1.65E-15	1.38E-13	yes	up	6.19	6.27	5.4	6.5	9.19	8.97	9.07	9.09	6.09	9.08
ENSG00000124019	FAM124B	family with sequence similarity 124 member B [Source:HGNC Symbol;Acc:HGNC:26224]	0.607286287	-0.719551304	1.67E-15	1.39E-13	yes	down	7.55	7.83	8.16	8.3	4.84	5.23	4.55	4.4	7.96	4.755
ENSG00000278878		novel transcript	0.405304918	-1.302920415	1.68E-15	1.40E-13	yes	down	25.4	15.19	5.56	8.83	0	21.89	2.51	0	13.745	6.1
ENSG00000146426	TIAM2	TIAM Rac1 associated GEF 2 [Source:HGNC Symbol;Acc:HGNC:11806]	1.798620957	0.846891184	2.10E-15	1.72E-13	yes	up	1.57	1.86	1.78	1.96	3.88	4.32	3.6	3.51	1.7925	3.8275
ENSG00000232624	LINC01517	long intergenic non-protein coding RNA 1517 [Source:HGNC Symbol;Acc:HGNC:51212]	0.566368256	-0.820187688	3.59E-15	2.87E-13	yes	down	4.91	3.44	4.92	4.04	2.8	1.75	2.37	2.55	4.3275	2.3675
ENSG00000227674	LINC00355	long intergenic non-protein coding RNA 355 [Source:HGNC Symbol;Acc:HGNC:27061]	0.60533606	-0.7241918	3.78E-15	3.01E-13	yes	down	6.04	5.25	6.72	7.02	5.29	3.08	3.26	3.01	6.2575	3.66
ENSG00000174738	NR1D2	nuclear receptor subfamily 1 group D member 2 [Source:HGNC Symbol;Acc:HGNC:7963]	0.575005659	-0.79835194	4.90E-15	3.86E-13	yes	down	2.53	2.86	3.01	3.05	1.43	1.47	1.87	1.67	2.8625	1.61
ENSG00000253651	SOD1P3	superoxide dismutase 1 pseudogene 3 [Source:HGNC Symbol;Acc:HGNC:45136]	0.511359098	-0.967591327	6.25E-15	4.87E-13	yes	down	51.47	49.92	53.72	54.57	24.44	31.56	25.51	23.44	52.42	26.2375
ENSG00000136010	ALDH1L2	aldehyde dehydrogenase 1 family member L2 [Source:HGNC Symbol;Acc:HGNC:26777]	0.622488377	-0.683881196	7.04E-15	5.44E-13	yes	down	2.43	2.46	2.64	2.76	1.42	1.68	1.54	2.63	2.5725	1.8175
ENSG00000261455	LINC01003	long intergenic non-protein coding RNA 1003 [Source:HGNC Symbol;Acc:HGNC:48957]	0.582549385	-0.779547737	8.18E-15	6.26E-13	yes	down	9.1	11.39	9.23	8.09	5.71	6.1	5.08	4.66	9.4525	5.3875
ENSG00000285641		novel protein	0.477544835	-1.066291906	8.29E-15	6.34E-13	yes	down	7.32	6.31	7.31	5.05	4.38	2.47	3.16	2.91	6.4975	3.23
ENSG00000180626	ZNF594	zinc finger protein 594 [Source:HGNC Symbol;Acc:HGNC:29392]	2.768115726	1.468904258	9.73E-15	7.43E-13	yes	up	0.7	0.57	1.05	0.56	1.58	1.61	2.25	1.66	0.72	1.775
ENSG00000202569	MIR146B	microRNA 146b [Source:HGNC Symbol;Acc:HGNC:32079]	0.610477352	-0.711990322	1.02E-14	7.72E-13	yes	down	4.04	4.15	4.13	4.33	2.56	2.74	2.31	2.37	4.1625	2.495
ENSG00000065717	TLE2	TLE family member 2, transcriptional corepressor [Source:HGNC Symbol;Acc:HGNC:11838]	1.707116229	0.771561287	1.05E-14	7.92E-13	yes	up	5.27	4.97	7.2	4.61	8.04	7.11	9.08	8.54	5.5125	8.1925
ENSG00000142694	EVA1B	eva-1 homolog B [Source:HGNC Symbol;Acc:HGNC:25558]	0.333547553	-1.584035638	1.38E-14	1.03E-12	yes	down	6.87	7.39	6.98	5.13	3.27	1.94	2.06	1.27	6.5925	2.135
ENSG00000197119	SLC25A29	solute carrier family 25 member 29 [Source:HGNC Symbol;Acc:HGNC:20116]	0.597590625	-0.742770579	1.42E-14	1.06E-12	yes	down	6.67	10.76	6.73	5.65	4.68	4.11	3.92	4.42	7.4525	4.2825
ENSG00000104833	TUBB4A	tubulin beta 4A class IVa [Source:HGNC Symbol;Acc:HGNC:20774]	0.617934706	-0.694473691	1.59E-14	1.17E-12	yes	down	8.2	11.59	10.73	8.88	5.48	5.81	5.75	5.49	9.85	5.6325
ENSG00000139190	VAMP1	vesicle associated membrane protein 1 [Source:HGNC Symbol;Acc:HGNC:12642]	0.58588882	-0.771301175	1.66E-14	1.22E-12	yes	down	5.39	5.56	6.51	6.93	4.12	7.89	3.66	5.01	6.0975	5.17
ENSG00000150977	RILPL2	Rab interacting lysosomal protein like 2 [Source:HGNC Symbol;Acc:HGNC:28787]	0.622260571	-0.684409261	2.18E-14	1.59E-12	yes	down	11.01	12.01	12.1	10.89	8.05	6.85	6.42	6.8	11.5025	7.03
ENSG00000248710		TRIM59 and iFT80 readthrough	0.470459125	-1.087858711	2.22E-14	1.62E-12	yes	down	1.82	2.08	3.15	3.78	1.13	0.98	1.98	1.23	2.7075	1.33
ENSG00000196427	NBPF4	NBPF member 4 [Source:HGNC Symbol;Acc:HGNC:26550]	1.563428124	0.644712896	3.25E-14	2.34E-12	yes	up	2.73	2.83	2.3	2.47	4.4	3.81	4.29	3.73	2.5825	4.0575
ENSG00000074660	SCARF1	scavenger receptor class F member 1 [Source:HGNC Symbol;Acc:HGNC:16820]	2.019201279	1.013784729	3.99E-14	2.84E-12	yes	up	4.95	1.97	1.9	1.83	3.95	17.77	8.23	4.02	2.6625	8.4925
ENSG00000287719		novel transcript	0.594406131	-0.750479098	5.02E-14	3.53E-12	yes	down	5.37	5.42	4.67	5.39	3.32	2.54	3.31	2.97	5.2125	3.035
ENSG00000141968	VAV1	vav guanine nucleotide exchange factor 1 [Source:HGNC Symbol;Acc:HGNC:12657]	0.659025749	-0.60159326	5.03E-14	3.53E-12	yes	down	9.96	8.91	8.16	8.91	6.56	5.33	5.45	5.32	8.985	5.665
ENSG00000163884	KLF15	Kruppel like factor 15 [Source:HGNC Symbol;Acc:HGNC:14536]	0.372056272	-1.426407255	5.29E-14	3.71E-12	yes	down	2.63	2.36	1.47	2.95	0.81	0.93	0.9	0.7	2.3525	0.835
ENSG00000178385	PLEKHM3	pleckstrin homology domain containing M3 [Source:HGNC Symbol;Acc:HGNC:34006]	2.18135275	1.125223089	5.41E-14	3.78E-12	yes	up	0.54	0.53	0.64	0.55	0.97	1.05	1.33	1.41	0.565	1.19
ENSG00000167964	RAB26	RAB26, member RAS oncogene family [Source:HGNC Symbol;Acc:HGNC:14259]	0.420832843	-1.248680793	5.84E-14	4.07E-12	yes	down	4.93	4.95	6.06	5.68	2.52	1.74	2.92	3.25	5.405	2.6075
ENSG00000049239	H6PD	hexose-6-phosphate dehydrogenase/glucose 1-dehydrogenase [Source:HGNC Symbol;Acc:HGNC:4795]	1.579413683	0.659389094	6.28E-14	4.36E-12	yes	up	1.57	1.16	1.17	1.31	1.9	1.77	2.22	2.17	1.3025	2.015
ENSG00000133106	EPSTI1	epithelial stromal interaction 1 [Source:HGNC Symbol;Acc:HGNC:16465]	0.546940808	-0.870543388	7.00E-14	4.85E-12	yes	down	4.38	3.66	3.68	4.25	2.86	2.04	3.4	2.15	3.9925	2.6125
ENSG00000230257	NFE4	nuclear factor, erythroid 4 [Source:HGNC Symbol;Acc:HGNC:29902]	0.642344461	-0.638580937	7.22E-14	4.98E-12	yes	down	12.57	12.67	12.52	11.37	5.77	8.36	8.12	6.89	12.2825	7.285
ENSG00000138641	HERC3	HECT and RLD domain containing E3 ubiquitin protein ligase 3 [Source:HGNC Symbol;Acc:HGNC:4876]	0.654674871	-0.611149492	7.99E-14	5.47E-12	yes	down	5.66	5.17	3.78	4.56	4.55	2.94	3	2.95	4.7925	3.36
ENSG00000237289	CKMT1B	creatine kinase, mitochondrial 1B [Source:HGNC Symbol;Acc:HGNC:1995]	0.637259985	-0.650046022	8.30E-14	5.66E-12	yes	down	17.28	14.24	16.77	12.9	10.65	9.84	6.57	11.32	15.2975	9.595
ENSG00000188290	HES4	hes family bHLH transcription factor 4 [Source:HGNC Symbol;Acc:HGNC:24149]	0.474779985	-1.074668978	1.05E-13	7.09E-12	yes	down	11.23	14.22	11.76	8.1	5.85	4.6	5.44	4.7	11.3275	5.1475
ENSG00000116014	KISS1R	KISS1 receptor [Source:HGNC Symbol;Acc:HGNC:4510]	0.643901595	-0.63508787	1.09E-13	7.31E-12	yes	down	12.6	17	16.89	10.49	9.28	8.03	8.63	7.96	14.245	8.475
ENSG00000186086	NBPF6	NBPF member 6 [Source:HGNC Symbol;Acc:HGNC:31988]	2.619410223	1.389242017	1.71E-13	1.12E-11	yes	up	0.86	0.51	1.04	1.16	1.5	2.43	2.89	2.41	0.8925	2.3075
ENSG00000278600		novel transcript, sense intronic to ST20	0.186729976	-2.420974548	1.73E-13	1.14E-11	yes	down	1.72	0.7	1.52	0.73	0	0.44	0.41	0	1.1675	0.2125
ENSG00000226137	BAIAP2-DT	BAIAP2 divergent transcript [Source:HGNC Symbol;Acc:HGNC:44342]	1.563723883	0.644985789	2.77E-13	1.77E-11	yes	up	2.46	2.88	2.94	2.71	4.16	4.42	3.97	4.22	2.7475	4.1925
ENSG00000109625	CPZ	carboxypeptidase Z [Source:HGNC Symbol;Acc:HGNC:2333]	1.808710018	0.854961126	3.32E-13	2.12E-11	yes	up	2.93	3.18	4.02	3.8	6.7	7.25	4.62	7.91	3.4825	6.62
ENSG00000106404	CLDN15	claudin 15 [Source:HGNC Symbol;Acc:HGNC:2036]	1.51651709	0.600761756	5.31E-13	3.32E-11	yes	up	6.08	5.6	5.77	5.38	9.72	7.75	8.41	7.67	5.7075	8.3875
ENSG00000285314		novel transcript	0.461882448	-1.114402371	6.18E-13	3.83E-11	yes	down	1.02	0.58	1.74	3.08	0	1.3	0.89	0.75	1.605	0.735
ENSG00000132481	TRIM47	tripartite motif containing 47 [Source:HGNC Symbol;Acc:HGNC:19020]	0.436509546	-1.195914892	6.91E-13	4.28E-11	yes	down	4.42	4.29	4.56	4.36	3.04	2.01	2.08	1.84	4.4075	2.2425
ENSG00000102032	RENBP	renin binding protein [Source:HGNC Symbol;Acc:HGNC:9959]	0.64493446	-0.632775537	7.11E-13	4.39E-11	yes	down	16.63	15.66	16.27	20.48	10.47	10.15	12.29	11.02	17.26	10.9825
ENSG00000102879	CORO1A	coronin 1A [Source:HGNC Symbol;Acc:HGNC:2252]	0.431285515	-1.213284833	8.65E-13	5.28E-11	yes	down	4.54	4.32	4.38	3.51	2.06	1.35	2.77	2.17	4.1875	2.0875
ENSG00000285000		novel protein, AGGF1-ZBED3-AS1 readthrough	3.052486542	1.609984935	9.06E-13	5.52E-11	yes	up	0.75	0.21	0.26	1.2	2.52	0.35	1.36	3.04	0.605	1.8175
ENSG00000174130	TLR6	toll like receptor 6 [Source:HGNC Symbol;Acc:HGNC:16711]	0.560705227	-0.834685577	1.13E-12	6.79E-11	yes	down	2.54	2.45	1.75	1.91	1.2	1.11	1.19	0.98	2.1625	1.12
ENSG00000260196		antisense to KCNJ11 and overlapping to a novel gene	0.344544875	-1.537236197	1.61E-12	9.51E-11	yes	down	1.96	2.29	0.79	1.29	0.45	1.01	0.15	0.51	1.5825	0.53
ENSG00000196549	MME	membrane metalloendopeptidase [Source:HGNC Symbol;Acc:HGNC:7154]	0.447648083	-1.159563088	1.81E-12	1.06E-10	yes	down	2.82	1.61	1.42	2.14	0.75	1.19	0.5	0.55	1.9975	0.7475
ENSG00000164463	CREBRF	CREB3 regulatory factor [Source:HGNC Symbol;Acc:HGNC:24050]	0.542708357	-0.881750971	2.13E-12	1.24E-10	yes	down	1.77	1.97	2	1.72	1.03	0.94	1.16	0.93	1.865	1.015
ENSG00000271949		novel transcript, LRRC8C-LRRC8D readthrough	0.652662124	-0.615591778	2.29E-12	1.33E-10	yes	down	3.18	3.05	3.22	3.08	1.5	1.47	1.53	3.05	3.1325	1.8875
ENSG00000177738		novel transcript, sense overlapping to ANXA2R	0.658094006	-0.603634414	2.55E-12	1.46E-10	yes	down	6.11	5.46	6.46	5.73	3.31	5.07	4.06	5.2	5.94	4.41
ENSG00000240583	AQP1	aquaporin 1 (Colton blood group) [Source:HGNC Symbol;Acc:HGNC:633]	0.65839257	-0.602980039	3.45E-12	1.94E-10	yes	down	7.81	7.95	8.24	8.29	5.38	4.87	5.05	5.33	8.0725	5.1575
ENSG00000104983	CCDC61	coiled-coil domain containing 61 [Source:HGNC Symbol;Acc:HGNC:33629]	0.591682462	-0.757104963	3.97E-12	2.22E-10	yes	down	12.11	11.03	11.19	11.7	6.4	6.8	6.94	7.26	11.5075	6.85
ENSG00000100311	PDGFB	platelet derived growth factor subunit B [Source:HGNC Symbol;Acc:HGNC:8800]	0.62328874	-0.682027445	4.14E-12	2.31E-10	yes	down	5.81	4.84	6.77	6.68	2.95	3.55	2.89	3.27	6.025	3.165
ENSG00000102010	BMX	BMX non-receptor tyrosine kinase [Source:HGNC Symbol;Acc:HGNC:1079]	0.607309231	-0.719496796	4.43E-12	2.47E-10	yes	down	26.63	30.46	29.58	28.41	17.45	16.3	16.85	15.88	28.77	16.62
ENSG00000248919	ATP5MF-PTCD1	ATP5MF-PTCD1 readthrough [Source:HGNC Symbol;Acc:HGNC:38844]	1.866616495	0.900425549	5.16E-12	2.85E-10	yes	up	1.93	1.52	3.53	3.26	4.46	3.76	3.63	5.28	2.56	4.2825
ENSG00000259992		ADAT1 and TMEM231 readthrough transcript	0.588367361	-0.765210879	5.44E-12	3.00E-10	yes	down	2.46	2.04	3.21	2.87	1.8	1.5	1.1	1.72	2.645	1.53
ENSG00000134762	DSC3	desmocollin 3 [Source:HGNC Symbol;Acc:HGNC:3037]	0.36867672	-1.439571776	6.97E-12	3.80E-10	yes	down	1.07	0.63	0.59	0.94	0.39	0.23	0.25	0.23	0.8075	0.275
ENSG00000259295	CSPG4P12	chondroitin sulfate proteoglycan 4 pseudogene 12 [Source:HGNC Symbol;Acc:HGNC:48362]	1.732109134	0.792529832	7.00E-12	3.81E-10	yes	up	2.34	1.35	2.31	1.87	2.49	3.43	2.82	2.4	1.9675	2.785
ENSG00000111424	VDR	vitamin D receptor [Source:HGNC Symbol;Acc:HGNC:12679]	0.606615392	-0.721145991	7.19E-12	3.91E-10	yes	down	3.22	2.87	3.21	3.03	2.12	1.81	1.9	1.67	3.0825	1.875
ENSG00000160226	CFAP410	cilia and flagella associated protein 410 [Source:HGNC Symbol;Acc:HGNC:1260]	1.636792479	0.710871421	7.46E-12	4.04E-10	yes	up	4.49	6	3.63	5.28	6.09	5.81	5.52	6.4	4.85	5.955
ENSG00000223839	FAM95B1	family with sequence similarity 95 member B1 [Source:HGNC Symbol;Acc:HGNC:32318]	1.534676436	0.617934517	8.59E-12	4.63E-10	yes	up	2.87	5.2	4.31	3.98	5.48	4.91	5.72	6.43	4.09	5.635
ENSG00000280063		tec	8.753483764	3.129857304	9.44E-12	5.06E-10	yes	up	0	0.4	0	0	1.22	0	0	2.13	0.1	0.8375
ENSG00000250501		novel transcript	0.552033612	-0.857171984	1.12E-11	6.00E-10	yes	down	10.25	8.01	9.42	8.21	4.86	4.15	4.63	4.8	8.9725	4.61
ENSG00000181625	SLX1B	SLX1 homolog B, structure-specific endonuclease subunit [Source:HGNC Symbol;Acc:HGNC:28748]	0.488807257	-1.03266239	1.18E-11	6.25E-10	yes	down	6.07	6.34	10.59	9.99	3.78	2.89	3.33	5.84	8.2475	3.96
ENSG00000118308	IRAG2	inositol 1,4,5-triphosphate receptor associated 2 [Source:HGNC Symbol;Acc:HGNC:6690]	0.466912987	-1.098774379	1.18E-11	6.26E-10	yes	down	3.86	3.42	3.48	4.37	1.4	2.06	1.75	1.45	3.7825	1.665
ENSG00000163131	CTSS	cathepsin S [Source:HGNC Symbol;Acc:HGNC:2545]	0.514757296	-0.958035721	1.55E-11	8.07E-10	yes	down	3.62	4.79	6.25	5.64	3.54	2.3	1.89	3.69	5.075	2.855
ENSG00000165449	SLC16A9	solute carrier family 16 member 9 [Source:HGNC Symbol;Acc:HGNC:23520]	1.661187382	0.732214818	1.57E-11	8.17E-10	yes	up	2.16	1.97	2.03	1.91	3.53	3.57	3.1	3.25	2.0175	3.3625
ENSG00000129646	QRICH2	glutamine rich 2 [Source:HGNC Symbol;Acc:HGNC:25326]	2.195447248	1.13451487	1.67E-11	8.65E-10	yes	up	0.61	1	0.42	0.32	1.21	1.06	1.2	1.85	0.5875	1.33
ENSG00000116661	FBXO2	F-box protein 2 [Source:HGNC Symbol;Acc:HGNC:13581]	0.24106371	-2.052513615	2.08E-11	1.07E-09	yes	down	2.36	2.4	2.23	2.53	0.45	0.29	0.59	0.77	2.38	0.525
ENSG00000235034	C19orf81	chromosome 19 open reading frame 81 [Source:HGNC Symbol;Acc:HGNC:40041]	0.456780066	-1.130428402	2.95E-11	1.50E-09	yes	down	49.33	42.51	45.08	23.97	19.32	26.96	16.04	8.04	40.2225	17.59
ENSG00000272398	CD24	CD24 molecule [Source:HGNC Symbol;Acc:HGNC:1645]	1.589413899	0.668494866	3.04E-11	1.54E-09	yes	up	4.74	4.28	6.13	3.89	7.87	7.51	6.62	7.18	4.76	7.295
ENSG00000165905	LARGE2	LARGE xylosyl- and glucuronyltransferase 2 [Source:HGNC Symbol;Acc:HGNC:16522]	0.542121358	-0.883312249	3.26E-11	1.65E-09	yes	down	6.7	5.62	5.31	4.95	4.02	3.35	2.05	4.53	5.645	3.4875
ENSG00000287856		novel protein	101.5769308	6.666428978	3.57E-11	1.80E-09	yes	up	0	0	0	0	0	0	0.97	0	0	0.2425
ENSG00000230733		novel transcript	2.358744029	1.238018866	4.19E-11	2.09E-09	yes	up	0.61	0.91	0.95	0.38	2.02	1.16	1.87	1.59	0.7125	1.66
ENSG00000175482	POLD4	DNA polymerase delta 4, accessory subunit [Source:HGNC Symbol;Acc:HGNC:14106]	0.644355032	-0.63407228	4.75E-11	2.35E-09	yes	down	20.93	23.14	19.76	18.28	9.67	12.94	11.23	11.42	20.5275	11.315
ENSG00000288663		novel protein, readthrough PFDN5-C12orf10	1.531984936	0.615402112	5.08E-11	2.50E-09	yes	up	3.9	4.16	5.46	3.69	7.19	5.49	7.72	7.34	4.3025	6.935
ENSG00000146278	PNRC1	proline rich nuclear receptor coactivator 1 [Source:HGNC Symbol;Acc:HGNC:17278]	0.555251996	-0.84878542	6.88E-11	3.34E-09	yes	down	6.56	6.03	5.14	5.2	3.43	3.75	3.82	2.74	5.7325	3.435
ENSG00000105662	CRTC1	CREB regulated transcription coactivator 1 [Source:HGNC Symbol;Acc:HGNC:16062]	1.959796806	0.970704082	7.19E-11	3.49E-09	yes	up	1.59	1.75	1.45	1.52	2.63	2.84	3.28	2.99	1.5775	2.935
ENSG00000220586	TUBBP9	tubulin beta class I pseudogene 9 [Source:HGNC Symbol;Acc:HGNC:42178]	0.599431019	-0.738334353	7.68E-11	3.70E-09	yes	down	2.12	2.32	2.39	2.03	1.3	1.33	1.16	1.48	2.215	1.3175
ENSG00000115738	ID2	inhibitor of DNA binding 2 [Source:HGNC Symbol;Acc:HGNC:5361]	0.432002228	-1.21088934	8.42E-11	4.05E-09	yes	down	6.29	6.87	7.27	6.46	2.79	3.03	1.96	3.22	6.7225	2.75
ENSG00000219665	ZNF433-AS1	ZNF433 and ZNF878 antisense RNA 1 [Source:HGNC Symbol;Acc:HGNC:53776]	0.591107955	-0.758506459	1.09E-10	5.16E-09	yes	down	23.32	30.54	22.04	24.53	15.16	11.56	13.24	13.38	25.1075	13.335
ENSG00000267280	TBX2-AS1	TBX2 antisense RNA 1 [Source:HGNC Symbol;Acc:HGNC:50355]	0.177255262	-2.496099637	1.12E-10	5.30E-09	yes	down	7.61	3.36	3.85	2.77	0.48	1.57	0.66	1.04	4.3975	0.9375
ENSG00000121594	CD80	CD80 molecule [Source:HGNC Symbol;Acc:HGNC:1700]	1.560040642	0.641583614	1.24E-10	5.83E-09	yes	up	6	6.35	7.2	6.41	8.29	9.71	9.36	10.39	6.49	9.4375
ENSG00000267002		novel transcript	0.655854211	-0.608552939	1.58E-10	7.38E-09	yes	down	4.31	8.08	3.88	5.32	4.81	3.39	3.94	4.85	5.3975	4.2475
ENSG00000125744	RTN2	reticulon 2 [Source:HGNC Symbol;Acc:HGNC:10468]	0.615862873	-0.699318937	1.82E-10	8.43E-09	yes	down	15.81	13.98	15.6	15.06	8.17	10.93	10.7	7.18	15.1125	9.245
ENSG00000272410		novel protein	1.50530655	0.590057316	1.84E-10	8.52E-09	yes	up	5.54	3.62	4.11	4.05	5.74	6.08	6.57	6.75	4.33	6.285
ENSG00000123427	EEF1AKMT3	EEF1A lysine methyltransferase 3 [Source:HGNC Symbol;Acc:HGNC:24936]	0.596552784	-0.745278299	2.10E-10	9.65E-09	yes	down	5.78	5.41	4.69	4.72	3.32	3.02	3.16	3.57	5.15	3.2675
ENSG00000142552	RCN3	reticulocalbin 3 [Source:HGNC Symbol;Acc:HGNC:21145]	0.562608352	-0.829797125	2.16E-10	9.90E-09	yes	down	6.46	7.68	7.96	8.19	4.24	4.41	4.32	4.15	7.5725	4.28
ENSG00000230084		novel transcript	1.716611605	0.779563657	2.92E-10	1.32E-08	yes	up	2.33	3.19	2.8	2.77	4.4	4.12	5.3	3.95	2.7725	4.4425
ENSG00000172650	AGAP5	ArfGAP with GTPase domain, ankyrin repeat and PH domain 5 [Source:HGNC Symbol;Acc:HGNC:23467]	1.948982497	0.962721134	3.11E-10	1.40E-08	yes	up	1.18	2.25	1.32	1.96	2.97	3.05	2.47	3.11	1.6775	2.9
ENSG00000272617		novel protein, COG8-PDF readthrough	2.396910069	1.261175781	3.16E-10	1.42E-08	yes	up	2.56	1.63	3.25	4.48	7.62	2.66	9.36	8.63	2.98	7.0675
ENSG00000130176	CNN1	calponin 1 [Source:HGNC Symbol;Acc:HGNC:2155]	0.490964018	-1.0263108	3.31E-10	1.48E-08	yes	down	4.53	5.02	4.78	6.01	2.1	3.22	2.27	2.34	5.085	2.4825
ENSG00000100968	NFATC4	nuclear factor of activated T cells 4 [Source:HGNC Symbol;Acc:HGNC:7778]	0.617652454	-0.695132815	3.80E-10	1.69E-08	yes	down	4.05	4.7	5.03	4.9	2.33	4.6	3.11	3.54	4.67	3.395
ENSG00000141526	SLC16A3	solute carrier family 16 member 3 [Source:HGNC Symbol;Acc:HGNC:10924]	0.560461451	-0.835312949	3.98E-10	1.77E-08	yes	down	6.11	6.38	4.34	5.21	3.37	2.12	1.75	2.21	5.51	2.3625
ENSG00000159899	NPR2	natriuretic peptide receptor 2 [Source:HGNC Symbol;Acc:HGNC:7944]	1.810840154	0.856659203	4.05E-10	1.79E-08	yes	up	3.4	3.11	3.81	3.17	6.76	8.11	6.52	5.84	3.3725	6.8075
ENSG00000129538	RNASE1	ribonuclease A family member 1, pancreatic [Source:HGNC Symbol;Acc:HGNC:10044]	0.639343637	-0.645336529	4.81E-10	2.12E-08	yes	down	22.43	18.5	21.66	19.4	13.42	12.41	11.49	13.17	20.4975	12.6225
ENSG00000077522	ACTN2	actinin alpha 2 [Source:HGNC Symbol;Acc:HGNC:164]	0.559717836	-0.837228373	5.07E-10	2.22E-08	yes	down	2.35	1.92	2.35	2.14	1.06	1.26	0.91	1.29	2.19	1.13
ENSG00000107140	TESK1	testis associated actin remodelling kinase 1 [Source:HGNC Symbol;Acc:HGNC:11731]	1.710317254	0.774263962	5.93E-10	2.57E-08	yes	up	3.84	3.86	3.1	3.5	6.84	7.71	6.13	7.44	3.575	7.03
ENSG00000287542		HECT and RLD domain containing E3 ubiquitin protein ligase 3 [Source:NCBI gene (formerly Entrezgene);Acc:8916]	1.564938884	0.646106316	6.46E-10	2.79E-08	yes	up	0.84	1.21	1.71	1.3	1.88	1.81	1.99	1.97	1.265	1.9125
ENSG00000232759		novel transcript, antisense to STEAP1B	1.730200961	0.790939615	6.50E-10	2.80E-08	yes	up	3.71	3.16	3.18	3.03	6.21	4.85	4.55	7.18	3.27	5.6975
ENSG00000260708		novel transcript, antisense to TBC1D22A	0.632867638	-0.660024298	6.97E-10	3.00E-08	yes	down	29.33	32.03	27.09	29.72	18.44	18.05	18.57	17.93	29.5425	18.2475
ENSG00000266709		novel transcript	0.56005656	-0.836355563	8.05E-10	3.43E-08	yes	down	6.51	6.33	6	5.2	2.86	3.1	3.55	3.7	6.01	3.3025
ENSG00000176973	FAM89B	family with sequence similarity 89 member B [Source:HGNC Symbol;Acc:HGNC:16708]	2.170578871	1.118079846	8.52E-10	3.62E-08	yes	up	4.49	1.87	2.03	1.04	4.06	2.51	7.4	6.16	2.3575	5.0325
ENSG00000167286	CD3D	CD3d molecule [Source:HGNC Symbol;Acc:HGNC:1673]	0.631833567	-0.66238351	8.69E-10	3.69E-08	yes	down	43.4	43.78	41.88	40.05	18.58	22.87	19	18.5	42.2775	19.7375
ENSG00000117318	ID3	inhibitor of DNA binding 3, HLH protein [Source:HGNC Symbol;Acc:HGNC:5362]	0.613605284	-0.704617188	9.03E-10	3.82E-08	yes	down	17.6	13.64	15.72	15.76	8.06	9.45	11.48	8.77	15.68	9.44
ENSG00000279821		TEC	2.161662685	1.112141417	1.11E-09	4.67E-08	yes	up	0.78	0.75	0.87	1	2	1.51	1.62	2.12	0.85	1.8125
ENSG00000121895	TMEM156	transmembrane protein 156 [Source:HGNC Symbol;Acc:HGNC:26260]	0.280390086	-1.834492755	1.17E-09	4.90E-08	yes	down	1.26	1.8	0.78	2.14	0.43	0.34	0.32	0.55	1.495	0.41
ENSG00000259726	CSPG4P11	chondroitin sulfate proteoglycan 4 pseudogene 11 [Source:HGNC Symbol;Acc:HGNC:48363]	6.379403127	2.673421448	1.29E-09	5.37E-08	yes	up	0.1	0.09	0	0	0.4	0.22	0.4	0.13	0.0475	0.2875
ENSG00000076662	ICAM3	intercellular adhesion molecule 3 [Source:HGNC Symbol;Acc:HGNC:5346]	0.524786002	-0.930198858	1.32E-09	5.51E-08	yes	down	8.88	8.74	5.07	10.16	2.05	4.5	5.81	4.32	8.2125	4.17
ENSG00000196431	CRYBA4	crystallin beta A4 [Source:HGNC Symbol;Acc:HGNC:2396]	0.317888433	-1.653407571	1.55E-09	6.43E-08	yes	down	10.88	14.74	12.82	11.13	5.24	3.52	3.4	2.12	12.3925	3.57
ENSG00000184906		methylenetetrahydrofolate dehydrogenase (NADP+ dependent) 1-like (MTHFD1L) pseudogene	6.235645883	2.640539001	1.60E-09	6.59E-08	yes	up	0	0.19	1.22	0	5.4	0.41	0.39	1.74	0.3525	1.985
ENSG00000148180	GSN	gelsolin [Source:HGNC Symbol;Acc:HGNC:4620]	0.627619826	-0.672037168	1.60E-09	6.59E-08	yes	down	5.84	6.16	4.77	5.01	3.08	3.68	2.86	3.28	5.445	3.225
ENSG00000068971	PPP2R5B	protein phosphatase 2 regulatory subunit B'beta [Source:HGNC Symbol;Acc:HGNC:9310]	0.647644414	-0.62672617	1.63E-09	6.72E-08	yes	down	5	7.59	5.26	5.95	3.36	3.49	2.66	3.87	5.95	3.345
ENSG00000137801	THBS1	thrombospondin 1 [Source:HGNC Symbol;Acc:HGNC:11785]	1.92486125	0.944754455	1.98E-09	8.10E-08	yes	up	0.63	0.47	0.35	0.83	1.06	0.78	0.86	1.77	0.57	1.1175
ENSG00000277701		novel transcript	3.400581394	1.765781424	2.27E-09	9.18E-08	yes	up	0.26	0.17	0.27	0.53	0.76	1.18	0.77	1.54	0.3075	1.0625
ENSG00000275719		novel transcript, antisense to SLC1A5	2.759666674	1.464494022	2.65E-09	1.06E-07	yes	up	0.43	0.73	1.83	1.44	4.12	1.79	4.75	1.59	1.1075	3.0625
ENSG00000123358	NR4A1	nuclear receptor subfamily 4 group A member 1 [Source:HGNC Symbol;Acc:HGNC:7980]	0.428160481	-1.223776452	3.03E-09	1.20E-07	yes	down	2.64	1.99	2.44	1.98	0.84	1.37	0.89	1.17	2.2625	1.0675
ENSG00000259660	DNM1P47	dynamin 1 pseudogene 47 [Source:HGNC Symbol;Acc:HGNC:35200]	1.631307106	0.706028406	3.32E-09	1.31E-07	yes	up	0.38	0.51	0.5	0.45	0.81	0.73	0.7	0.7	0.46	0.735
ENSG00000114805	PLCH1	phospholipase C eta 1 [Source:HGNC Symbol;Acc:HGNC:29185]	0.547703676	-0.868532532	3.39E-09	1.34E-07	yes	down	1.61	1.17	1.28	1.22	0.66	0.82	0.75	0.71	1.32	0.735
ENSG00000272556	GTF2IP13	general transcription factor IIi pseudogene 13 [Source:HGNC Symbol;Acc:HGNC:51725]	1.548243474	0.630632365	3.52E-09	1.38E-07	yes	up	0.88	0.69	0.71	0.84	1.26	1.18	1.04	1.27	0.78	1.1875
ENSG00000286388		novel transcript	1.756510736	0.812712395	3.54E-09	1.39E-07	yes	up	1.58	1.25	1.73	1.45	2.54	2.48	2.69	2.72	1.5025	2.6075
ENSG00000157303	SUSD3	sushi domain containing 3 [Source:HGNC Symbol;Acc:HGNC:28391]	0.650814724	-0.619681203	3.66E-09	1.44E-07	yes	down	13.97	14.73	13.83	12.38	8.23	9.49	9.93	9.49	13.7275	9.285
ENSG00000272916		novel transcript	0.557392487	-0.843234539	3.85E-09	1.51E-07	yes	down	1.54	2.25	1.36	1.3	1.36	0.91	1.76	0.47	1.6125	1.125
ENSG00000203883	SOX18	SRY-box transcription factor 18 [Source:HGNC Symbol;Acc:HGNC:11194]	0.572878335	-0.803699317	4.21E-09	1.64E-07	yes	down	4.68	6.91	4.59	4.34	3.17	3.06	2.46	2.8	5.13	2.8725
ENSG00000165879	FRAT1	FRAT regulator of WNT signaling pathway 1 [Source:HGNC Symbol;Acc:HGNC:3944]	0.575493592	-0.79712823	4.46E-09	1.73E-07	yes	down	3.84	2.86	3.7	3.85	1.69	1.98	2	2.17	3.5625	1.96
ENSG00000185950	IRS2	insulin receptor substrate 2 [Source:HGNC Symbol;Acc:HGNC:6126]	0.588993246	-0.763677004	5.47E-09	2.09E-07	yes	down	1.36	1.14	0.85	1.17	0.64	0.68	0.64	0.65	1.13	0.6525
ENSG00000005961	ITGA2B	integrin subunit alpha 2b [Source:HGNC Symbol;Acc:HGNC:6138]	0.575839426	-0.796261526	5.51E-09	2.11E-07	yes	down	3.37	2.7	4.44	3.4	2.24	1.64	1.67	2.53	3.4775	2.02
ENSG00000078687	TNRC6C	trinucleotide repeat containing adaptor 6C [Source:HGNC Symbol;Acc:HGNC:29318]	1.669353982	0.739289907	5.56E-09	2.12E-07	yes	up	1.15	0.86	0.78	0.85	1.77	1.2	1.12	1.49	0.91	1.395
ENSG00000174951	FUT1	fucosyltransferase 1 (H blood group) [Source:HGNC Symbol;Acc:HGNC:4012]	0.631296334	-0.663610721	6.02E-09	2.29E-07	yes	down	4.3	4.81	5.08	5.11	2.92	2.2	2.8	3.5	4.825	2.855
ENSG00000278299	TBC1D3C	TBC1 domain family member 3C [Source:HGNC Symbol;Acc:HGNC:24889]	0.012815648	-6.285949745	6.75E-09	2.55E-07	yes	down	0	0.32	0.36	0.55	0	0	0	0	0.3075	0
ENSG00000197380	DACT3	dishevelled binding antagonist of beta catenin 3 [Source:HGNC Symbol;Acc:HGNC:30745]	0.381927961	-1.388627551	7.64E-09	2.87E-07	yes	down	1.14	0.99	1.21	1.28	0.48	0.36	0.68	0.26	1.155	0.445
ENSG00000113532	ST8SIA4	ST8 alpha-N-acetyl-neuraminide alpha-2,8-sialyltransferase 4 [Source:HGNC Symbol;Acc:HGNC:10871]	0.578729489	-0.789038936	7.75E-09	2.91E-07	yes	down	1.8	2.82	1.82	2.16	1.54	1.16	0.9	0.98	2.15	1.145
ENSG00000266642		novel transcript, antisense to DHRS13	1.818211999	0.862520424	7.85E-09	2.94E-07	yes	up	5.89	2.7	4.68	4.6	5.13	9.5	9.4	7.98	4.4675	8.0025
ENSG00000235919	ASH1L-AS1	ASH1L antisense RNA 1 [Source:HGNC Symbol;Acc:HGNC:44146]	0.599528179	-0.738100529	8.04E-09	3.01E-07	yes	down	11.79	15.32	14.14	14.41	8.29	8.49	8.67	7.16	13.915	8.1525
ENSG00000274049	INO80B-WBP1	INO80B-WBP1 readthrough (NMD candidate) [Source:HGNC Symbol;Acc:HGNC:49199]	1.64385111	0.717079634	9.20E-09	3.41E-07	yes	up	1.92	2.26	2.28	1.84	4.89	3.27	6.1	2.02	2.075	4.07
ENSG00000183260	ABHD16B	abhydrolase domain containing 16B [Source:HGNC Symbol;Acc:HGNC:16128]	0.012847337	-6.282386799	9.34E-09	3.45E-07	yes	down	0	1.36	0.3	0.21	0	0	0	0	0.4675	0
ENSG00000215695	RSC1A1	regulator of solute carriers 1 [Source:HGNC Symbol;Acc:HGNC:10458]	0.555360175	-0.848504369	9.35E-09	3.45E-07	yes	down	5.32	4.73	3.15	4.5	3.15	1.89	2.11	2.43	4.425	2.395
ENSG00000136928	GABBR2	gamma-aminobutyric acid type B receptor subunit 2 [Source:HGNC Symbol;Acc:HGNC:4507]	2.244150901	1.166169689	1.04E-08	3.79E-07	yes	up	0.31	0.48	0.52	0.39	23.48	1.25	0.96	1.45	0.425	6.785
ENSG00000166510	CCDC68	coiled-coil domain containing 68 [Source:HGNC Symbol;Acc:HGNC:24350]	0.552957971	-0.854758265	1.05E-08	3.82E-07	yes	down	3.05	2.05	3.05	3.91	1.26	1.75	1.7	1.31	3.015	1.505
ENSG00000218891	ZNF579	zinc finger protein 579 [Source:HGNC Symbol;Acc:HGNC:26646]	0.645562693	-0.631370887	1.05E-08	3.84E-07	yes	down	7	7.73	7.03	3.86	5.28	4.26	3.75	5.26	6.405	4.6375
ENSG00000187024	PTRH1	peptidyl-tRNA hydrolase 1 homolog [Source:HGNC Symbol;Acc:HGNC:27039]	0.666516774	-0.585286912	1.14E-08	4.14E-07	yes	down	17.82	19.12	18.94	19.66	9.77	12.72	11.55	12.1	18.885	11.535
ENSG00000120318	ARAP3	ArfGAP with RhoGAP domain, ankyrin repeat and PH domain 3 [Source:HGNC Symbol;Acc:HGNC:24097]	0.64739646	-0.627278618	1.17E-08	4.24E-07	yes	down	2.75	2.79	3.13	2.85	1.71	1.92	1.87	2	2.88	1.875
ENSG00000266983	RANBP3-DT	RANBP3 divergent transcript [Source:HGNC Symbol;Acc:HGNC:55312]	0.360868675	-1.470454177	1.21E-08	4.36E-07	yes	down	19.17	22.23	22.57	19.04	6.44	3.81	9.04	9.63	20.7525	7.23
ENSG00000107819	SFXN3	sideroflexin 3 [Source:HGNC Symbol;Acc:HGNC:16087]	0.461772116	-1.114747037	1.24E-08	4.45E-07	yes	down	1.66	1.71	1.8	2.71	1.29	1.04	0.99	0.93	1.97	1.0625
ENSG00000181444	ZNF467	zinc finger protein 467 [Source:HGNC Symbol;Acc:HGNC:23154]	0.441342956	-1.180027922	1.25E-08	4.50E-07	yes	down	1.65	1.72	1.58	1.41	0.62	0.97	0.84	0.94	1.59	0.8425
ENSG00000025708	TYMP	thymidine phosphorylase [Source:HGNC Symbol;Acc:HGNC:3148]	0.495634601	-1.012651186	1.32E-08	4.75E-07	yes	down	2.79	3.18	3.1	2.38	1.38	3.26	1.57	1.24	2.8625	1.8625
ENSG00000126500	FLRT1	fibronectin leucine rich transmembrane protein 1 [Source:HGNC Symbol;Acc:HGNC:3760]	2.981628461	1.576100495	1.37E-08	4.89E-07	yes	up	0.21	0.13	0.24	0.32	0.59	0.75	0.65	0.67	0.225	0.665
ENSG00000139549	DHH	desert hedgehog signaling molecule [Source:HGNC Symbol;Acc:HGNC:2865]	1.626751845	0.70199419	1.41E-08	5.01E-07	yes	up	1.26	1.37	1.17	1.52	2.22	2.18	1.88	2.22	1.33	2.125
ENSG00000146054	TRIM7	tripartite motif containing 7 [Source:HGNC Symbol;Acc:HGNC:16278]	0.644763599	-0.633157798	1.62E-08	5.73E-07	yes	down	11.69	11.77	10.8	9.99	6.92	9.02	8.85	7.75	11.0625	8.135
ENSG00000224888		novel transcript, antisense to FAM38A	1.727324352	0.788539014	1.63E-08	5.77E-07	yes	up	1.61	1.2	1.38	0.72	2.44	1.68	2.04	1.8	1.2275	1.99
ENSG00000065357	DGKA	diacylglycerol kinase alpha [Source:HGNC Symbol;Acc:HGNC:2849]	0.660644684	-0.598053543	1.64E-08	5.77E-07	yes	down	9.19	7.76	12.64	13.01	6.46	5.7	10.21	7.16	10.65	7.3825
ENSG00000254682		novel transcript	0.650241627	-0.620952178	1.78E-08	6.23E-07	yes	down	27.35	29.48	24.96	26.19	21.28	12.46	17.59	17.08	26.995	17.1025
ENSG00000085563	ABCB1	ATP binding cassette subfamily B member 1 [Source:HGNC Symbol;Acc:HGNC:40]	0.664605682	-0.589429467	2.39E-08	8.25E-07	yes	down	2.75	3.33	4.82	5.11	2.5	2.34	2.51	2.35	4.0025	2.425
ENSG00000137331	IER3	immediate early response 3 [Source:HGNC Symbol;Acc:HGNC:5392]	0.665168429	-0.5882084	2.51E-08	8.64E-07	yes	down	12.98	12.27	12.09	11.01	7.33	9.01	8.21	7.11	12.0875	7.915
ENSG00000229688	CRPPA-AS1	CRPPA antisense RNA 1 [Source:HGNC Symbol;Acc:HGNC:48962]	0.492720123	-1.021159702	2.63E-08	9.01E-07	yes	down	6.22	7.09	7.18	5.23	3.01	2.31	3.48	4.16	6.43	3.24
ENSG00000269386	RAB11B-AS1	RAB11B antisense RNA 1 [Source:HGNC Symbol;Acc:HGNC:44178]	1.50213969	0.587018981	2.72E-08	9.30E-07	yes	up	6.45	6.36	5.17	6.36	7.9	7.63	8.82	8.58	6.085	8.2325
ENSG00000274460		novel transcript	0.460029811	-1.120200741	3.43E-08	1.16E-06	yes	down	3.32	3.67	3.56	3.13	1.17	1.68	1.62	1.69	3.42	1.54
ENSG00000225684	FAM225B	family with sequence similarity 225 member B [Source:HGNC Symbol;Acc:HGNC:21865]	0.142225347	-2.813749493	3.59E-08	1.20E-06	yes	down	0.28	0	0.47	0	0	0.08	0	0	0.1875	0.02
ENSG00000285382		novel protein	0.643306465	-0.636421907	3.62E-08	1.21E-06	yes	down	12.9	14.41	13.94	11.06	12.49	10.78	10.85	12.53	13.0775	11.6625
ENSG00000230606		novel transcript	2.678026296	1.421170127	3.69E-08	1.23E-06	yes	up	0.54	1.07	0.87	0.76	1.62	1.65	2.07	1.78	0.81	1.78
ENSG00000171121	KCNMB3	potassium calcium-activated channel subfamily M regulatory beta subunit 3 [Source:HGNC Symbol;Acc:HGNC:6287]	0.595697106	-0.747349145	3.72E-08	1.24E-06	yes	down	8.23	8.11	8.96	9.26	3.93	3.43	4.42	5.52	8.64	4.325
ENSG00000085117	CD82	CD82 molecule [Source:HGNC Symbol;Acc:HGNC:6210]	0.541081946	-0.886080991	3.73E-08	1.24E-06	yes	down	3.34	4.6	4.71	4.34	2.83	3.2	2.75	3.35	4.2475	3.0325
ENSG00000007255	TRAPPC6A	trafficking protein particle complex 6A [Source:HGNC Symbol;Acc:HGNC:23069]	1.756036408	0.812322756	3.89E-08	1.29E-06	yes	up	10.41	6.41	9.39	6.93	15.61	15.83	13.88	13.77	8.285	14.7725
ENSG00000185482	STAC3	SH3 and cysteine rich domain 3 [Source:HGNC Symbol;Acc:HGNC:28423]	0.427077173	-1.227431307	3.90E-08	1.29E-06	yes	down	2.87	2.62	2.34	3.85	1.11	1.24	1.12	1.25	2.92	1.18
ENSG00000145147	SLIT2	slit guidance ligand 2 [Source:HGNC Symbol;Acc:HGNC:11086]	0.603447178	-0.728700603	3.92E-08	1.30E-06	yes	down	2.19	2.07	2.71	2.18	1.5	1.2	1.96	1.37	2.2875	1.5075
ENSG00000143507	DUSP10	dual specificity phosphatase 10 [Source:HGNC Symbol;Acc:HGNC:3065]	0.598462106	-0.740668194	4.13E-08	1.36E-06	yes	down	3.72	3.2	3.85	4.47	2.28	2.51	2.1	1.98	3.81	2.2175
ENSG00000121068	TBX2	T-box transcription factor 2 [Source:HGNC Symbol;Acc:HGNC:11597]	0.448398055	-1.157148076	4.21E-08	1.38E-06	yes	down	1.35	1.22	0.91	0.98	0.41	0.74	0.36	0.47	1.115	0.495
ENSG00000008311	AASS	aminoadipate-semialdehyde synthase [Source:HGNC Symbol;Acc:HGNC:17366]	0.629414504	-0.66791767	4.24E-08	1.39E-06	yes	down	2.51	2.16	1.74	2.5	1.64	1.08	1.76	1.17	2.2275	1.4125
ENSG00000133069	TMCC2	transmembrane and coiled-coil domain family 2 [Source:HGNC Symbol;Acc:HGNC:24239]	2.448424167	1.291853514	4.49E-08	1.47E-06	yes	up	0.34	0.44	0.58	0.4	1.01	0.75	1.16	1.2	0.44	1.03
ENSG00000224389	C4B	complement C4B (Chido blood group) [Source:HGNC Symbol;Acc:HGNC:1324]	0.459610642	-1.121515893	4.96E-08	1.61E-06	yes	down	4.91	2.86	6.86	4.13	2.88	2.5	1.92	3.09	4.69	2.5975
ENSG00000267552		novel transcript	1.675735366	0.744794335	5.47E-08	1.76E-06	yes	up	1.61	1.66	0.37	1.15	1.53	3.09	2.29	1.17	1.1975	2.02
ENSG00000152689	RASGRP3	RAS guanyl releasing protein 3 [Source:HGNC Symbol;Acc:HGNC:14545]	0.49151639	-1.02468857	5.85E-08	1.87E-06	yes	down	4.82	2.45	4.65	3.85	1.2	1.37	2.83	2.39	3.9425	1.9475
ENSG00000126458	RRAS	RAS related [Source:HGNC Symbol;Acc:HGNC:10447]	0.572631972	-0.804319872	5.87E-08	1.88E-06	yes	down	9.14	10.9	10.83	7.96	6.02	6.24	4.51	4.46	9.7075	5.3075
ENSG00000131188	PRR7	proline rich 7, synaptic [Source:HGNC Symbol;Acc:HGNC:28130]	0.512889383	-0.963280387	7.35E-08	2.31E-06	yes	down	6.04	4.34	3.87	5.35	2.64	2.78	1.95	2.57	4.9	2.485
ENSG00000130720	FIBCD1	fibrinogen C domain containing 1 [Source:HGNC Symbol;Acc:HGNC:25922]	2.064564932	1.045837793	8.21E-08	2.56E-06	yes	up	4.02	3.44	5.37	3.68	5.22	4.52	4.7	4.03	4.1275	4.6175
ENSG00000282907		novel transcript	1.614533464	0.691117344	9.44E-08	2.92E-06	yes	up	8.81	6.95	7.02	6.49	12.43	13.13	9.29	11.62	7.3175	11.6175
ENSG00000114378	HYAL1	hyaluronidase 1 [Source:HGNC Symbol;Acc:HGNC:5320]	0.565474689	-0.822465646	1.11E-07	3.39E-06	yes	down	3.72	2.82	3.03	3.83	1.74	1.71	1.79	1.95	3.35	1.7975
ENSG00000041353	RAB27B	RAB27B, member RAS oncogene family [Source:HGNC Symbol;Acc:HGNC:9767]	0.521953477	-0.938006873	1.14E-07	3.48E-06	yes	down	0.73	0.7	0.68	1.19	0.38	0.3	0.48	0.39	0.825	0.3875
ENSG00000163611	SPICE1	spindle and centriole associated protein 1 [Source:HGNC Symbol;Acc:HGNC:25083]	0.626870295	-0.673761127	1.24E-07	3.77E-06	yes	down	3.36	4.09	3.26	2.67	1.9	1.3	1.32	1.44	3.345	1.49
ENSG00000285864		novel transcript	65.41366548	6.031520154	1.27E-07	3.83E-06	yes	up	0	0	0	0	0.25	1.99	0.77	0	0	0.7525
ENSG00000174600	CMKLR1	chemerin chemokine-like receptor 1 [Source:HGNC Symbol;Acc:HGNC:2121]	3.347226138	1.742966022	1.33E-07	3.99E-06	yes	up	0.12	0.2	0.25	0.09	0.36	0.29	0.35	0.46	0.165	0.365
ENSG00000198400	NTRK1	neurotrophic receptor tyrosine kinase 1 [Source:HGNC Symbol;Acc:HGNC:8031]	0.523121696	-0.934781488	1.49E-07	4.44E-06	yes	down	1.96	2.51	2.42	3.06	1.03	1.28	0.98	1.52	2.4875	1.2025
ENSG00000159674	SPON2	spondin 2 [Source:HGNC Symbol;Acc:HGNC:11253]	0.534003048	-0.905080118	1.50E-07	4.48E-06	yes	down	3.51	4.4	3.62	3.79	1.97	2.41	2.83	2.05	3.83	2.315
ENSG00000127585	FBXL16	F-box and leucine rich repeat protein 16 [Source:HGNC Symbol;Acc:HGNC:14150]	0.578971862	-0.788434859	1.52E-07	4.54E-06	yes	down	3.39	2.81	2.62	10.6	1.36	1.55	1.64	1.85	4.855	1.6
ENSG00000148737	TCF7L2	transcription factor 7 like 2 [Source:HGNC Symbol;Acc:HGNC:11641]	1.557635958	0.639358094	1.53E-07	4.57E-06	yes	up	2.96	2.95	2.74	2.36	4.2	5.54	4.01	5.19	2.7525	4.735
ENSG00000182021		methylenetetrahydrofolate dehydrogenase (NADP+ dependent) 1-like (MTHFD1L) pseudogene	4.29086222	2.101267577	1.58E-07	4.71E-06	yes	up	0.05	0.12	0.1	0.19	0.75	0.61	0.92	0.56	0.115	0.71
ENSG00000149679	CABLES2	Cdk5 and Abl enzyme substrate 2 [Source:HGNC Symbol;Acc:HGNC:16143]	1.66144347	0.732437206	1.68E-07	4.97E-06	yes	up	1.23	1.12	1.16	1.67	2.26	2.04	1.77	2.38	1.295	2.1125
ENSG00000158715	SLC45A3	solute carrier family 45 member 3 [Source:HGNC Symbol;Acc:HGNC:8642]	0.571339403	-0.807580066	1.78E-07	5.24E-06	yes	down	2.14	2.03	2.33	2.14	1.33	1.16	1.17	1.53	2.16	1.2975
ENSG00000100577	GSTZ1	glutathione S-transferase zeta 1 [Source:HGNC Symbol;Acc:HGNC:4643]	1.600858011	0.678845353	1.81E-07	5.32E-06	yes	up	6.54	5.83	6.96	4.58	8.65	10.64	10.7	10.39	5.9775	10.095
ENSG00000229056	HECW2-AS1	HECW2 antisense RNA 1 [Source:HGNC Symbol;Acc:HGNC:54062]	0.270317369	-1.887273882	1.88E-07	5.52E-06	yes	down	1.98	2.69	1.37	1.55	0.23	0.65	0.46	0.81	1.8975	0.5375
ENSG00000285130		novel protein	0.623209859	-0.682210038	2.01E-07	5.86E-06	yes	down	3.18	3.1	6.23	4.54	2.95	4.08	1.76	2.02	4.2625	2.7025
ENSG00000176912	TYMSOS	TYMS opposite strand [Source:HGNC Symbol;Acc:HGNC:29553]	0.568191622	-0.815550536	2.07E-07	6.02E-06	yes	down	13.5	11.91	14.52	12.63	5.86	7.59	8.36	8.75	13.14	7.64
ENSG00000253392		novel transcript, antisense to ZNF57	5.136694522	2.360840279	2.27E-07	6.57E-06	yes	up	0.92	0.12	0.1	0.02	1.6	0.46	1.04	0.96	0.29	1.015
ENSG00000198711	SSBP3-AS1	SSBP3 antisense RNA 1 [Source:HGNC Symbol;Acc:HGNC:32328]	2.166401682	1.115300764	2.39E-07	6.90E-06	yes	up	0.63	0.56	0.86	0.74	1.46	1.3	1.44	1.8	0.6975	1.5
ENSG00000243477	NAA80	N-alpha-acetyltransferase 80, NatH catalytic subunit [Source:HGNC Symbol;Acc:HGNC:30252]	0.641266106	-0.641004939	2.67E-07	7.63E-06	yes	down	8.03	8.54	8.19	8.1	6.2	4.97	5.47	5.47	8.215	5.5275
ENSG00000260884		novel transcript	1.61964504	0.695677668	2.73E-07	7.78E-06	yes	up	1.56	1.24	1.01	1.3	1.9	2.35	1.97	2.2	1.2775	2.105
ENSG00000102547	CAB39L	calcium binding protein 39 like [Source:HGNC Symbol;Acc:HGNC:20290]	0.573861142	-0.801226407	2.75E-07	7.83E-06	yes	down	2.65	2.08	2.29	2.4	1.43	2.15	1.29	2.1	2.355	1.7425
ENSG00000175155	YPEL2	yippee like 2 [Source:HGNC Symbol;Acc:HGNC:18326]	0.525206379	-0.929043657	3.38E-07	9.49E-06	yes	down	1.06	1.1	1.04	0.88	0.53	0.44	0.55	0.48	1.02	0.5
ENSG00000249849		novel transcript	0.409983329	-1.286362848	3.55E-07	9.93E-06	yes	down	4.03	4.41	3.17	5.23	1.42	1.45	1.98	1.71	4.21	1.64
ENSG00000205560	CPT1B	carnitine palmitoyltransferase 1B [Source:HGNC Symbol;Acc:HGNC:2329]	2.2392656	1.163025657	3.78E-07	1.05E-05	yes	up	2.62	0.88	1.31	0.72	5.1	4.49	2.29	3.3	1.3825	3.795
ENSG00000185614	INKA1	inka box actin regulator 1 [Source:HGNC Symbol;Acc:HGNC:32480]	0.471808849	-1.083725619	3.79E-07	1.05E-05	yes	down	5.28	4.93	4.04	4.83	2.38	2.7	2.05	1.66	4.77	2.1975
ENSG00000130584	ZBTB46	zinc finger and BTB domain containing 46 [Source:HGNC Symbol;Acc:HGNC:16094]	1.630468464	0.705286537	3.87E-07	1.07E-05	yes	up	1.05	0.81	1.25	1	1.6	1.77	1.67	1.49	1.0275	1.6325
ENSG00000182057	OGFRP1	opioid growth factor receptor pseudogene 1 [Source:HGNC Symbol;Acc:HGNC:50511]	1.827302203	0.86971525	3.97E-07	1.10E-05	yes	up	0.49	0.49	0.83	0.89	0.9	1.29	1.04	1.11	0.675	1.085
ENSG00000203814	H2BC18	H2B clustered histone 18 [Source:HGNC Symbol;Acc:HGNC:24700]	1.70992852	0.773936018	4.01E-07	1.11E-05	yes	up	1.84	2.18	2.58	2.82	3.96	3.33	3.24	4.76	2.355	3.8225
ENSG00000142544	CTU1	cytosolic thiouridylase subunit 1 [Source:HGNC Symbol;Acc:HGNC:29590]	0.601769993	-0.732715925	4.32E-07	1.19E-05	yes	down	2.8	6.06	3.53	2.79	2.29	2.44	2.21	1.98	3.795	2.23
ENSG00000118777	ABCG2	ATP binding cassette subfamily G member 2 (Junior blood group) [Source:HGNC Symbol;Acc:HGNC:74]	1.539057865	0.622047475	4.32E-07	1.19E-05	yes	up	1.7	1.48	1.37	1.68	2.58	2.49	2.22	2.51	1.5575	2.45
ENSG00000129007	CALML4	calmodulin like 4 [Source:HGNC Symbol;Acc:HGNC:18445]	1.739626569	0.798777648	4.33E-07	1.19E-05	yes	up	8.9	6.24	7.49	6.18	8.3	7.6	9.96	8.19	7.2025	8.5125
ENSG00000223804		Poly [ADP-ribose] polymerase 8 (PARP8) pseudogene	0.57715641	-0.792965752	5.92E-07	1.60E-05	yes	down	3.4	4.27	4.76	4.49	2.31	2	2.12	1.58	4.23	2.0025
ENSG00000249087	ZNF436-AS1	ZNF436 antisense RNA 1 [Source:HGNC Symbol;Acc:HGNC:25122]	0.646200178	-0.629946946	6.00E-07	1.61E-05	yes	down	6.16	4.83	5.54	5.8	2.65	3.18	2.88	2.95	5.5825	2.915
ENSG00000250067	YJEFN3	YjeF N-terminal domain containing 3 [Source:HGNC Symbol;Acc:HGNC:24785]	0.405455409	-1.302384837	6.27E-07	1.68E-05	yes	down	1.21	1.42	2.07	1.03	0.58	0.46	1.17	0.43	1.4325	0.66
ENSG00000274020	LINC01138	long intergenic non-protein coding RNA 1138 [Source:HGNC Symbol;Acc:HGNC:49454]	0.666159361	-0.586060749	6.68E-07	1.78E-05	yes	down	6.81	6.69	5.81	6.38	5.35	3.49	4.44	4.09	6.4225	4.3425
ENSG00000179431	FJX1	four-jointed box kinase 1 [Source:HGNC Symbol;Acc:HGNC:17166]	0.634886073	-0.655430363	6.84E-07	1.82E-05	yes	down	4.4	3.64	5.5	3.95	3.41	2.53	2.3	3	4.3725	2.81
ENSG00000167680	SEMA6B	semaphorin 6B [Source:HGNC Symbol;Acc:HGNC:10739]	0.571676973	-0.806727914	6.92E-07	1.84E-05	yes	down	1.98	2.22	2.9	3.08	2.25	1.56	3.33	2.67	2.545	2.4525
ENSG00000216866	RPS2P55	ribosomal protein S2 pseudogene 55 [Source:HGNC Symbol;Acc:HGNC:36140]	0.218854794	-2.191954108	7.69E-07	2.03E-05	yes	down	2.68	1.45	2.63	0.66	0.29	0.3	0.29	0.7	1.855	0.395
ENSG00000227496		novel transcript	0.278601124	-1.843727016	8.00E-07	2.11E-05	yes	down	2.81	3.64	2.99	1.44	1.52	0	0.04	1.37	2.72	0.7325
ENSG00000285410	GABPB1-IT1	GABPB1 intronic transcript [Source:HGNC Symbol;Acc:HGNC:25469]	0.611654177	-0.709211896	8.00E-07	2.11E-05	yes	down	1.25	1.36	1.26	1.15	0.77	0.8	0.79	0.64	1.255	0.75
ENSG00000186472	PCLO	piccolo presynaptic cytomatrix protein [Source:HGNC Symbol;Acc:HGNC:13406]	1.552712413	0.634790644	8.28E-07	2.18E-05	yes	up	2.19	0.75	1.96	1.3	2.96	2.05	2.08	2.14	1.55	2.3075
ENSG00000261798		novel transcript, antisense to BMP8B	0.266125631	-1.90982063	8.95E-07	2.34E-05	yes	down	1.67	1.94	0.84	1.51	0.25	0.32	0.44	0.52	1.49	0.3825
ENSG00000232442	MHENCR	melanoma highly expressed competing endogenous lncRNA for miR-425 and miR-489 [Source:HGNC Symbol;Acc:HGNC:53110]	0.61821033	-0.693830334	1.03E-06	2.67E-05	yes	down	14.57	13.13	12.07	14.74	9.29	6.94	8.12	7.99	13.6275	8.085
ENSG00000256671	LIMS4	LIM zinc finger domain containing 4 [Source:HGNC Symbol;Acc:HGNC:39941]	0.215667221	-2.213121178	1.12E-06	2.87E-05	yes	down	0.66	0.67	1.41	0.8	0.64	0.09	0	0	0.885	0.1825
ENSG00000213533	STIMATE	STIM activating enhancer [Source:HGNC Symbol;Acc:HGNC:30526]	1.610766329	0.68774722	1.15E-06	2.94E-05	yes	up	3.94	4.71	1.61	3.09	3.9	2.53	1.73	2.82	3.3375	2.745
ENSG00000125740	FOSB	FosB proto-oncogene, AP-1 transcription factor subunit [Source:HGNC Symbol;Acc:HGNC:3797]	0.33772524	-1.56607809	1.15E-06	2.94E-05	yes	down	0.55	0.38	0.66	0.77	0.22	0.48	0.28	0.31	0.59	0.3225
ENSG00000274512	TBC1D3L	TBC1 domain family member 3L [Source:HGNC Symbol;Acc:HGNC:51246]	1.742131045	0.800853149	1.15E-06	2.94E-05	yes	up	1.28	1.41	1.42	1.19	1.59	1.82	2.35	2.07	1.325	1.9575
ENSG00000178752	ERFE	erythroferrone [Source:HGNC Symbol;Acc:HGNC:26727]	1.524840279	0.608658134	1.32E-06	3.34E-05	yes	up	3.73	2.87	4.14	4.42	6.18	4.45	4.78	6.36	3.79	5.4425
ENSG00000182175	RGMA	repulsive guidance molecule BMP co-receptor a [Source:HGNC Symbol;Acc:HGNC:30308]	0.33366425	-1.583530977	1.36E-06	3.44E-05	yes	down	0.13	0.17	0.15	0.19	0.04	0.03	0.07	0.07	0.16	0.0525
ENSG00000212643	ZRSR2P1	ZRSR2 pseudogene 1 [Source:HGNC Symbol;Acc:HGNC:12456]	3.849374524	1.944624045	1.41E-06	3.57E-05	yes	up	0	0.32	0	0.79	1.16	0.36	1.64	1.05	0.2775	1.0525
ENSG00000287626		novel transcript, antisense to DTNBP1	0.415871601	-1.265789924	1.48E-06	3.73E-05	yes	down	1.93	2.72	2.54	3.23	1.07	1.23	0.85	1.08	2.605	1.0575
ENSG00000265666	RARA-AS1	RARA antisense RNA 1 [Source:HGNC Symbol;Acc:HGNC:49577]	0.443392736	-1.17334296	1.53E-06	3.84E-05	yes	down	2.18	1.61	1.87	1.71	0.77	1.02	0.67	0.75	1.8425	0.8025
ENSG00000285976		novel protein	0.369114621	-1.43785921	1.59E-06	3.99E-05	yes	down	0	1.64	0.21	0.15	0.33	0	0.19	0.21	0.5	0.1825
ENSG00000229186	ADAM1A	ADAM metallopeptidase domain 1A (pseudogene) [Source:HGNC Symbol;Acc:HGNC:187]	1.85214904	0.889200195	1.60E-06	4.01E-05	yes	up	1.55	1.45	1.19	1.19	2.21	2.56	2.74	2.26	1.345	2.4425
ENSG00000277112	ANKRD20A21P	ankyrin repeat domain 20 family member A21, pseudogene [Source:HGNC Symbol;Acc:HGNC:52329]	1.521990941	0.605959772	1.66E-06	4.15E-05	yes	up	8.1	8.78	9.06	3.21	9.38	8.48	6.12	8.71	7.2875	8.1725
ENSG00000154319	FAM167A	family with sequence similarity 167 member A [Source:HGNC Symbol;Acc:HGNC:15549]	0.411755327	-1.280140779	1.95E-06	4.82E-05	yes	down	0.68	0.66	0.54	0.68	0.35	0.29	0.19	0.37	0.64	0.3
ENSG00000012124	CD22	CD22 molecule [Source:HGNC Symbol;Acc:HGNC:1643]	1.551207875	0.633392033	2.01E-06	4.93E-05	yes	up	3.28	3.92	3.17	3.3	3.73	4.63	5.62	4.17	3.4175	4.5375
ENSG00000183971	NPW	neuropeptide W [Source:HGNC Symbol;Acc:HGNC:30509]	0.377694605	-1.404707918	2.18E-06	5.33E-05	yes	down	2.94	7.39	2.96	4.14	2.45	0.82	1.54	1.97	4.3575	1.695
ENSG00000168792	ABHD15	abhydrolase domain containing 15 [Source:HGNC Symbol;Acc:HGNC:26971]	1.61009524	0.687146028	2.36E-06	5.74E-05	yes	up	1.21	1.2	1.39	1.46	2.5	1.8	1.99	2.04	1.315	2.0825
ENSG00000181773	GPR3	G protein-coupled receptor 3 [Source:HGNC Symbol;Acc:HGNC:4484]	0.643287268	-0.63646496	2.40E-06	5.82E-05	yes	down	4.03	4.7	3.7	4.61	2.43	2.77	3.04	2.49	4.26	2.6825
ENSG00000259953		novel transcript, overlapping SUSD1	0.602185208	-0.731720824	2.44E-06	5.91E-05	yes	down	2.62	1.13	1.69	1.47	0.59	1.08	0.8	1.45	1.7275	0.98
ENSG00000068831	RASGRP2	RAS guanyl releasing protein 2 [Source:HGNC Symbol;Acc:HGNC:9879]	0.639641038	-0.644665592	2.71E-06	6.52E-05	yes	down	7.89	7.31	7.69	5.59	4.6	5.07	4.33	3.8	7.12	4.45
ENSG00000241697	TMEFF1	transmembrane protein with EGF like and two follistatin like domains 1 [Source:HGNC Symbol;Acc:HGNC:11866]	0.489931937	-1.029346755	2.75E-06	6.62E-05	yes	down	1.63	2.04	0.96	1.28	0.79	0.76	0.35	0.92	1.4775	0.705
ENSG00000274615		aminopeptidase puromycin sensitive (NPEPPS) pseudogene	4.961316514	2.310722999	2.81E-06	6.74E-05	yes	up	0.78	0	0	0	0.74	0.99	1.45	0.59	0.195	0.9425
ENSG00000288564		novel protein	2.367093196	1.243116508	2.82E-06	6.75E-05	yes	up	4.86	3.48	2.43	0	4.68	3.84	9.89	6.27	2.6925	6.17
ENSG00000189227	C15orf61	chromosome 15 open reading frame 61 [Source:HGNC Symbol;Acc:HGNC:34453]	0.600832508	-0.734965223	2.89E-06	6.90E-05	yes	down	1.81	1.69	2.19	1.5	1.54	1.24	1.44	0.82	1.7975	1.26
ENSG00000276337		novel transcript, sense intronic to ZCCHC14	0.422430128	-1.243215363	3.13E-06	7.43E-05	yes	down	0.75	0.74	0.77	0.35	0.25	0.33	0.28	0.21	0.6525	0.2675
ENSG00000217236	SP9	Sp9 transcription factor [Source:HGNC Symbol;Acc:HGNC:30690]	0.414130765	-1.271841714	3.36E-06	7.95E-05	yes	down	1.11	1.11	0.98	0.91	0.27	0.48	0.33	0.59	1.0275	0.4175
ENSG00000267577	DNAAF3-AS1	DNAAF3 antisense RNA 1 [Source:HGNC Symbol;Acc:HGNC:55292]	0.453977206	-1.139308232	3.92E-06	9.17E-05	yes	down	2.72	3.37	3.03	3.37	1.53	0.84	0.92	1.41	3.1225	1.175
ENSG00000183780	SLC35F3	solute carrier family 35 member F3 [Source:HGNC Symbol;Acc:HGNC:23616]	1.692731543	0.759353188	3.95E-06	9.22E-05	yes	up	1.39	1.02	1.36	1.08	2.29	1.85	2.02	2.07	1.2125	2.0575
ENSG00000277738		novel transcript	0.609394218	-0.714552283	3.95E-06	9.22E-05	yes	down	11.71	12.43	12.94	11.72	8.41	4.93	8.66	7.05	12.2	7.2625
ENSG00000256825		novel protein	20.64011972	4.367379434	4.23E-06	9.83E-05	yes	up	0	0	0.04	0	0.58	0.44	0.26	0	0.01	0.32
ENSG00000275857		novel transcript, antisense to KIF22	50.02598051	5.644605634	4.24E-06	9.85E-05	yes	up	0	0	0	0	0	0.32	1	3.33	0	1.1625
ENSG00000107738	VSIR	V-set immunoregulatory receptor [Source:HGNC Symbol;Acc:HGNC:30085]	0.585971199	-0.771098339	4.42E-06	0.000102079	yes	down	2.87	2.43	3.12	1.36	0.96	0.87	0.75	2.44	2.445	1.255
ENSG00000181856	SLC2A4	solute carrier family 2 member 4 [Source:HGNC Symbol;Acc:HGNC:11009]	0.555569857	-0.847959767	4.49E-06	0.000103663	yes	down	1.6	2.03	1.72	1.35	0.91	0.9	0.72	0.73	1.675	0.815
ENSG00000180739	S1PR5	sphingosine-1-phosphate receptor 5 [Source:HGNC Symbol;Acc:HGNC:14299]	0.300581501	-1.734171872	4.74E-06	0.000109014	yes	down	0.73	0.69	0.63	0.6	0.34	0.09	0.26	0.21	0.6625	0.225
ENSG00000168918	INPP5D	inositol polyphosphate-5-phosphatase D [Source:HGNC Symbol;Acc:HGNC:6079]	0.540669386	-0.887181426	5.11E-06	0.000116953	yes	down	4.41	3.37	4.89	4.59	2.21	2.72	2	1.84	4.315	2.1925
ENSG00000150782	IL18	interleukin 18 [Source:HGNC Symbol;Acc:HGNC:5986]	0.488992617	-1.032115412	5.12E-06	0.000117013	yes	down	3.62	3.39	4.62	2.92	1.68	1.6	1.71	1.89	3.6375	1.72
ENSG00000285779		novel protein	0.503018862	-0.991315596	5.19E-06	0.00011861	yes	down	1.68	2.33	1.73	1.18	1.42	0.13	1.13	0.71	1.73	0.8475
ENSG00000153234	NR4A2	nuclear receptor subfamily 4 group A member 2 [Source:HGNC Symbol;Acc:HGNC:7981]	0.604341221	-0.726564745	5.39E-06	0.00012238	yes	down	2.08	2.25	1.75	2.15	1.22	1.12	1.32	1.43	2.0575	1.2725
ENSG00000279208		ankyrin repeat domain 18A (ANKRD18A) pseudogene	1.620942769	0.696833154	5.54E-06	0.000125592	yes	up	0.27	0.5	0.63	0.67	0.67	0.76	0.9	0.49	0.5175	0.705
ENSG00000286945		novel transcript	2.117645824	1.082461319	5.58E-06	0.000126222	yes	up	3.32	5.64	7.23	5.97	9.81	12.47	10.24	11.8	5.54	11.08
ENSG00000137936	BCAR3	BCAR3 adaptor protein, NSP family member [Source:HGNC Symbol;Acc:HGNC:973]	0.557232832	-0.843647832	5.66E-06	0.000127988	yes	down	4.08	3.86	5.67	4.2	3.06	2.15	1.88	2.82	4.4525	2.4775
ENSG00000133636	NTS	neurotensin [Source:HGNC Symbol;Acc:HGNC:8038]	0.580042983	-0.785768281	5.81E-06	0.000130824	yes	down	3.68	5	6.6	5.37	2.82	2.73	3.83	2.25	5.1625	2.9075
ENSG00000260966		novel transcript, overlapping to DCUN1D5	4.662021155	2.220955551	5.81E-06	0.000130795	yes	up	0.16	0	0	0.01	0.3	0	0.17	0.34	0.0425	0.2025
ENSG00000224660	SH3BP5-AS1	SH3BP5 antisense RNA 1 [Source:HGNC Symbol;Acc:HGNC:44501]	1.807813729	0.854246035	6.08E-06	0.000136315	yes	up	0.82	0.67	0.73	0.78	1.44	1.48	1.19	1.64	0.75	1.4375
ENSG00000228705	LINC00659	long intergenic non-protein coding RNA 659 [Source:HGNC Symbol;Acc:HGNC:44316]	0.322986947	-1.630452234	6.21E-06	0.000139042	yes	down	1.92	1.87	2.43	2.08	0.2	0.88	0.98	0.65	2.075	0.6775
ENSG00000278922		novel transcript	1.524623139	0.608452677	6.31E-06	0.000141007	yes	up	3.71	4.64	4.62	5.57	7.42	7.7	7.04	5.59	4.635	6.9375
ENSG00000233527	ZNF529-AS1	ZNF529 antisense RNA 1 [Source:HGNC Symbol;Acc:HGNC:51275]	0.627866323	-0.671470662	6.60E-06	0.000147039	yes	down	6.1	4.92	4.61	6.18	3.14	4	3	4.16	5.4525	3.575
ENSG00000104321	TRPA1	transient receptor potential cation channel subfamily A member 1 [Source:HGNC Symbol;Acc:HGNC:497]	0.598246731	-0.741187487	6.72E-06	0.000149572	yes	down	2.18	1.1	1.48	2.28	0.54	1.29	1.14	0.55	1.76	0.88
ENSG00000180998	GPR137C	G protein-coupled receptor 137C [Source:HGNC Symbol;Acc:HGNC:25445]	2.685580041	1.42523372	7.05E-06	0.000156084	yes	up	0.26	0.18	0.26	0.16	0.48	0.4	0.39	0.54	0.215	0.4525
ENSG00000157613	CREB3L1	cAMP responsive element binding protein 3 like 1 [Source:HGNC Symbol;Acc:HGNC:18856]	0.447281997	-1.160743403	7.23E-06	0.00015968	yes	down	1.73	1.22	1.26	1.5	0.6	0.44	0.34	0.67	1.4275	0.5125
ENSG00000179855	GIPC3	GIPC PDZ domain containing family member 3 [Source:HGNC Symbol;Acc:HGNC:18183]	0.622862281	-0.683014886	7.38E-06	0.000162675	yes	down	1.47	1.66	1.67	1.37	0.7	1.02	1.07	0.94	1.5425	0.9325
ENSG00000168404	MLKL	mixed lineage kinase domain like pseudokinase [Source:HGNC Symbol;Acc:HGNC:26617]	0.615477852	-0.700221152	7.58E-06	0.00016693	yes	down	2.44	3.16	3.74	2.89	2.39	1.6	1.51	1.94	3.0575	1.86
ENSG00000251595	ABCA11P	ATP binding cassette subfamily A member 11, pseudogene [Source:HGNC Symbol;Acc:HGNC:31]	1.756926641	0.813053954	7.61E-06	0.000167331	yes	up	1.37	2.36	1.4	1.75	3.69	2.35	3.94	2.1	1.72	3.02
ENSG00000204323	SMIM5	small integral membrane protein 5 [Source:HGNC Symbol;Acc:HGNC:40030]	3.349052201	1.743752863	8.35E-06	0.000182443	yes	up	0.04	0.2	0.19	0.1	0.55	0.32	0.45	0.56	0.1325	0.47
ENSG00000246922	UBAP1L	ubiquitin associated protein 1 like [Source:HGNC Symbol;Acc:HGNC:40028]	2.146016269	1.101661013	8.46E-06	0.000184689	yes	up	0.19	0.17	0.27	0.18	0.49	0.32	0.53	0.42	0.2025	0.44
ENSG00000168038	ULK4	unc-51 like kinase 4 [Source:HGNC Symbol;Acc:HGNC:15784]	0.656264859	-0.607649912	8.84E-06	0.000192355	yes	down	4.51	4.45	4.55	5.85	2.22	1.82	3.13	4.14	4.84	2.8275
ENSG00000271576	PRKACB-DT	PRKACB divergent transcript [Source:HGNC Symbol;Acc:HGNC:55245]	0.621944137	-0.685143091	9.03E-06	0.000196179	yes	down	5.24	5.27	3.93	3.8	3.01	2.21	2.8	3.07	4.56	2.7725
ENSG00000202198	7SK	7SK RNA [Source:RFAM;Acc:RF00100]	0.021482446	-5.540697893	9.07E-06	0.000197022	yes	down	0	0	0	15.67	0	0	0	0	3.9175	0
ENSG00000231443		protein phosphatase 4, regulatory subunit 2 (PPP4R2) pseudogene	24.39097156	4.608275321	9.09E-06	0.000197336	yes	up	0	0.04	0	0	0.36	0.13	1.12	0	0.01	0.4025
ENSG00000113448	PDE4D	phosphodiesterase 4D [Source:HGNC Symbol;Acc:HGNC:8783]	0.636262215	-0.652306646	9.50E-06	0.000205401	yes	down	1.22	5.18	1.77	1.51	1.44	0.87	0.88	0.98	2.42	1.0425
ENSG00000135622	SEMA4F	ssemaphorin 4F [Source:HGNC Symbol;Acc:HGNC:10734]	1.877611507	0.908898588	9.90E-06	0.000213238	yes	up	0.66	0.61	0.62	1.15	0.98	0.94	0.9	0.97	0.76	0.9475
ENSG00000138764	CCNG2	cyclin G2 [Source:HGNC Symbol;Acc:HGNC:1593]	0.581710738	-0.781626159	9.92E-06	0.000213472	yes	down	1.99	1.9	1.49	2.07	1.59	0.89	1.08	1.47	1.8625	1.2575
ENSG00000165168	CYBB	cytochrome b-245 beta chain [Source:HGNC Symbol;Acc:HGNC:2578]	1.523332645	0.607231013	1.07E-05	0.000228553	yes	up	1.35	1.25	1.16	1.16	1.86	1.67	1.87	1.9	1.23	1.825
ENSG00000261342		novel transcript	2.192434622	1.132533822	1.07E-05	0.000228543	yes	up	0.95	0.71	1.14	0.64	1.7	1.7	1.6	2.5	0.86	1.875
ENSG00000171561	OR2AT4	olfactory receptor family 2 subfamily AT member 4 [Source:HGNC Symbol;Acc:HGNC:19620]	0.658786981	-0.602116051	1.07E-05	0.000228601	yes	down	1.63	0.81	0.88	0.9	0.44	0.54	0.65	0.72	1.055	0.5875
ENSG00000231864		novel transcript	1.642985206	0.71631949	1.07E-05	0.000228802	yes	up	8.85	0	10.28	7.84	11.82	8.92	10.47	12.99	6.7425	11.05
ENSG00000285283		novel protein	45.57883565	5.510292165	1.08E-05	0.000231261	yes	up	0	0	0	0	0	0	1.38	0	0	0.345
ENSG00000254721		novel transcript	3.596722653	1.846682916	1.14E-05	0.000242016	yes	up	0	0	1.25	0.42	1.9	0.93	0	3.54	0.4175	1.5925
ENSG00000162878	PKDCC	protein kinase domain containing, cytoplasmic [Source:HGNC Symbol;Acc:HGNC:25123]	2.140162264	1.097720184	1.18E-05	0.000250033	yes	up	1.57	2.13	1.66	0.85	2.9	2.38	2.77	4.21	1.5525	3.065
ENSG00000256569		novel transcript, antisense to UNC119B	5.657676635	2.500209722	1.18E-05	0.000250251	yes	up	0	0	0	1.66	6.05	0	1.15	2.46	0.415	2.415
ENSG00000134146	DPH6	diphthamine biosynthesis 6 [Source:HGNC Symbol;Acc:HGNC:30543]	1.502472204	0.587338301	1.31E-05	0.000276649	yes	up	5.77	3.03	5.02	5.28	8.39	5.18	8.21	7.87	4.775	7.4125
ENSG00000119737	GPR75	G protein-coupled receptor 75 [Source:HGNC Symbol;Acc:HGNC:4526]	1.582555215	0.662255836	1.35E-05	0.000283726	yes	up	2.37	1.5	2.06	2.6	2.73	4.06	3.95	2.53	2.1325	3.3175
ENSG00000172780	RAB43	RAB43, member RAS oncogene family [Source:HGNC Symbol;Acc:HGNC:19983]	0.628555393	-0.669888204	1.38E-05	0.000290215	yes	down	3.25	1.47	1.51	3.64	1.18	1.53	2.4	1.22	2.4675	1.5825
ENSG00000205436	EXOC3L4	exocyst complex component 3 like 4 [Source:HGNC Symbol;Acc:HGNC:20120]	0.658326855	-0.603124045	1.41E-05	0.000295671	yes	down	7.73	5.07	6.02	4.91	3.39	3.13	3.62	4.59	5.9325	3.6825
ENSG00000278931		ankyrin repeat domain 20 family, member A3 (ANKRD20A3) pseudogene	1.585437346	0.664880865	1.42E-05	0.000296716	yes	up	4.35	2.19	2.59	3.08	5.97	5.19	5.87	2.95	3.0525	4.995
ENSG00000286239		novel protein, WDFY1-AP1S3 readthrough	8.674274353	3.116743074	1.42E-05	0.000297934	yes	up	0	0.08	0	0	0.14	0.19	0.34	0.05	0.02	0.18
ENSG00000260727	SLC7A5P1	solute carrier family 7 member 5 pseudogene 1 [Source:HGNC Symbol;Acc:HGNC:29458]	7.849408458	2.972583935	1.46E-05	0.000305461	yes	up	0	0	0	1.02	1.69	0	1.56	5.28	0.255	2.1325
ENSG00000274419	TBC1D3D	TBC1 domain family member 3D [Source:HGNC Symbol;Acc:HGNC:28944]	2.117748379	1.082531185	1.48E-05	0.000308069	yes	up	1.01	0.28	0.55	0.81	1.93	1.45	0.97	1.32	0.6625	1.4175
ENSG00000130675	MNX1	motor neuron and pancreas homeobox 1 [Source:HGNC Symbol;Acc:HGNC:4979]	0.648453403	-0.624925187	1.49E-05	0.000311181	yes	down	3.91	4.45	3.88	4.13	2.37	3.69	2.95	3	4.0925	3.0025
ENSG00000118276	B4GALT6	beta-1,4-galactosyltransferase 6 [Source:HGNC Symbol;Acc:HGNC:929]	1.581258922	0.66107362	1.51E-05	0.000313354	yes	up	0.96	0.83	1.21	1.04	1.48	1.54	1.59	1.41	1.01	1.505
ENSG00000185338	SOCS1	suppressor of cytokine signaling 1 [Source:HGNC Symbol;Acc:HGNC:19383]	1.819704395	0.863704108	1.51E-05	0.000313878	yes	up	1.5	2.89	2.01	1.8	3.56	3.9	3.69	4.04	2.05	3.7975
ENSG00000279348		TEC	2.55055533	1.350811398	1.52E-05	0.000316328	yes	up	0.23	0.57	0.34	0.43	1.37	0.83	0.76	0.96	0.3925	0.98
ENSG00000281207	SLFNL1-AS1	SLFNL1 antisense RNA 1 [Source:HGNC Symbol;Acc:HGNC:44126]	1.641823384	0.71529894	1.63E-05	0.000335532	yes	up	0.71	0.62	0.63	0.9	1.01	1.25	1.14	1.22	0.715	1.155
ENSG00000260725		novel transcript	0.652245211	-0.61651365	1.63E-05	0.000335775	yes	down	2.4	2.33	2.57	2.33	1.1	1.4	1.53	1.91	2.4075	1.485
ENSG00000273709	U2	U2 spliceosomal RNA [Source:RFAM;Acc:RF00004]	0.50612575	-0.982432218	1.64E-05	0.000338508	yes	down	4.72	4.88	7.11	2.81	1.59	1.22	16.77	2.23	4.88	5.4525
ENSG00000173727		Finkel-Biskis-Reilly murine sarcoma virus (FBR-MuSV) ubiquitously expressed (FAU) pseudogene	0.646588999	-0.629079134	1.66E-05	0.00034306	yes	down	26.36	30.56	31.01	5.25	5.01	2.7	4.83	13.5	23.295	6.51
ENSG00000155367	PPM1J	protein phosphatase, Mg2+/Mn2+ dependent 1J [Source:HGNC Symbol;Acc:HGNC:20785]	0.552779507	-0.855223962	1.72E-05	0.000354859	yes	down	2.36	2.65	2.09	2.45	1.4	1.67	0.95	1.26	2.3875	1.32
ENSG00000185775	SPATA31A6	SPATA31 subfamily A member 6 [Source:HGNC Symbol;Acc:HGNC:32006]	1.840370413	0.879996168	1.73E-05	0.000356206	yes	up	0.42	0.38	0.58	0.68	0.84	1.11	0.72	1.1	0.515	0.9425
ENSG00000168389	MFSD2A	major facilitator superfamily domain containing 2A [Source:HGNC Symbol;Acc:HGNC:25897]	0.471234879	-1.08548177	1.74E-05	0.000358921	yes	down	1.6	1.53	1.53	1.7	0.75	1.06	0.75	0.64	1.59	0.8
ENSG00000189157	FAM47E	family with sequence similarity 47 member E [Source:HGNC Symbol;Acc:HGNC:34343]	1.828431112	0.870606272	1.83E-05	0.000375955	yes	up	1.76	1.56	1	1.93	3.11	3	3.52	1.96	1.5625	2.8975
ENSG00000213221	DNLZ	DNL-type zinc finger [Source:HGNC Symbol;Acc:HGNC:33879]	0.022414426	-5.479428635	1.87E-05	0.000381651	yes	down	0	0.47	0	0	0	0	0	0	0.1175	0
ENSG00000260103		coiled-coil-helix-coiled-coil-helix domain-containing protein 7 (CHCHD7) pseudogene	0.192362592	-2.378099824	1.99E-05	0.000404645	yes	down	0.24	0.3	0.33	0.13	0	0.05	0.09	0.05	0.25	0.0475
ENSG00000288620		ring finger protein 216 pseudogene 1	0.023150998	-5.432781819	2.02E-05	0.000409735	yes	down	1.26	0	0	5.17	0	0	0	0	1.6075	0
ENSG00000235288		novel transcript, antisense to CCBP2	2.373195559	1.246830988	2.05E-05	0.000416694	yes	up	0.47	3.79	0.72	5.88	1.02	0.24	25.19	0.6	2.715	6.7625
ENSG00000163993	S100P	S100 calcium binding protein P [Source:HGNC Symbol;Acc:HGNC:10504]	0.590564882	-0.759832525	2.09E-05	0.00042332	yes	down	19.03	20.65	24.3	24.64	12.08	15.08	12.46	11.67	22.155	12.8225
ENSG00000172137	CALB2	calbindin 2 [Source:HGNC Symbol;Acc:HGNC:1435]	3.243577732	1.697586013	2.18E-05	0.000440955	yes	up	0.32	0.28	0.63	0.36	1.06	0.89	0.93	1.13	0.3975	1.0025
ENSG00000203896	LIME1	Lck interacting transmembrane adaptor 1 [Source:HGNC Symbol;Acc:HGNC:26016]	2.19221509	1.132389356	2.18E-05	0.00044093	yes	up	2.11	0.27	1.86	1.82	2.35	3.26	2.39	2.59	1.515	2.6475
ENSG00000186998	EMID1	EMI domain containing 1 [Source:HGNC Symbol;Acc:HGNC:18036]	1.576408546	0.656641475	2.22E-05	0.000447154	yes	up	1.94	2.26	3.09	2.49	3.28	3.07	3.41	3.39	2.445	3.2875
ENSG00000280339		novel transcript	0.353584212	-1.499874235	2.30E-05	0.000463295	yes	down	0.6	0.52	0.56	0.27	0.15	0.24	0.24	0.04	0.4875	0.1675
ENSG00000089116	LHX5	LIM homeobox 5 [Source:HGNC Symbol;Acc:HGNC:14216]	0.373165772	-1.422111432	2.38E-05	0.000477881	yes	down	0.65	0.5	0.8	0.59	0.3	0.12	0.21	0.3	0.635	0.2325
ENSG00000250125	LINC02232	long intergenic non-protein coding RNA 2232 [Source:HGNC Symbol;Acc:HGNC:53103]	0.376076682	-1.410901238	2.40E-05	0.000481165	yes	down	1.07	1.02	0.86	1.2	0.58	0.06	0.36	0.33	1.0375	0.3325
ENSG00000277443	MARCKS	myristoylated alanine rich protein kinase C substrate [Source:HGNC Symbol;Acc:HGNC:6759]	0.665779701	-0.586883211	2.44E-05	0.000488316	yes	down	2.11	2.03	1.57	1.59	1.4	1.11	1.36	0.87	1.825	1.185
ENSG00000206530	CFAP44	cilia and flagella associated protein 44 [Source:HGNC Symbol;Acc:HGNC:25631]	2.076368967	1.054062831	2.64E-05	0.000524451	yes	up	0.62	0.87	0.32	0.9	0.68	1.15	1.16	1.08	0.6775	1.0175
ENSG00000122861	PLAU	plasminogen activator, urokinase [Source:HGNC Symbol;Acc:HGNC:9052]	0.538188602	-0.893816258	2.65E-05	0.000526743	yes	down	2.05	1.75	1.8	1.74	1.05	0.74	16.89	0.87	1.835	4.8875
ENSG00000073464	CLCN4	chloride voltage-gated channel 4 [Source:HGNC Symbol;Acc:HGNC:2022]	0.662906647	-0.593122376	2.71E-05	0.000537777	yes	down	1.38	1.48	1.3	1.35	0.72	1.28	0.91	0.86	1.3775	0.9425
ENSG00000117242	PINK1-AS	PINK1 antisense RNA [Source:HGNC Symbol;Acc:HGNC:38872]	1.538559141	0.621579901	2.76E-05	0.000546761	yes	up	0.98	1.05	0.92	1.08	1.66	1.22	1.53	1.66	1.0075	1.5175
ENSG00000214562	NUTM2D	NUT family member 2D [Source:HGNC Symbol;Acc:HGNC:23447]	1.683007441	0.751041556	2.85E-05	0.00056298	yes	up	1.49	0.91	1.28	1.33	2.14	2.3	1.89	1.89	1.2525	2.055
ENSG00000272716	SLC30A6-DT	SLC30A6 divergent transcript [Source:HGNC Symbol;Acc:HGNC:55203]	0.618080373	-0.694133641	2.90E-05	0.00057206	yes	down	12.13	11.72	9.9	13.17	6.19	7.49	7.34	7.31	11.73	7.0825
ENSG00000273420		novel transcript	41.41119959	5.37194909	2.90E-05	0.000572066	yes	up	0	0	0	0	2.31	0	0.2	2.06	0	1.1425
ENSG00000105649	RAB3A	RAB3A, member RAS oncogene family [Source:HGNC Symbol;Acc:HGNC:9777]	0.612729558	-0.706677646	2.92E-05	0.000576107	yes	down	4.63	5.16	3.46	4.26	2.28	2.74	2.23	3.03	4.3775	2.57
ENSG00000102524	TNFSF13B	TNF superfamily member 13b [Source:HGNC Symbol;Acc:HGNC:11929]	0.595803569	-0.74709133	2.94E-05	0.000578054	yes	down	3.38	6.58	3.23	5.36	1.78	1.78	2.47	2.42	4.6375	2.1125
ENSG00000284722		novel transcript	0.557779724	-0.842232602	2.96E-05	0.000581621	yes	down	1.03	1.09	0.9	0.64	0.38	0.6	0.38	0.68	0.915	0.51
ENSG00000216895		novel transcript, antisense to RBM33	0.650203305	-0.621037206	3.02E-05	0.000592567	yes	down	28.26	12.39	21.77	10.63	11.52	12.84	9.68	7.18	18.2625	10.305
ENSG00000153233	PTPRR	protein tyrosine phosphatase receptor type R [Source:HGNC Symbol;Acc:HGNC:9680]	0.651963201	-0.617137559	3.12E-05	0.000610667	yes	down	4.27	4.15	3.51	4	1.77	3.07	2.2	2.29	3.9825	2.3325
ENSG00000268883	PNMA6B	PNMA family member 6B (pseudogene) [Source:HGNC Symbol;Acc:HGNC:26681]	0.072606396	-3.783759542	3.17E-05	0.000618886	yes	down	0.51	0.4	0.04	0	0	0	0	0.05	0.2375	0.0125
ENSG00000226287	TMEM191A	transmembrane protein 191A (pseudogene) [Source:HGNC Symbol;Acc:HGNC:25317]	0.499694539	-1.000881643	3.25E-05	0.000632842	yes	down	9.94	8.1	6.37	7.77	1.11	3.88	6.5	5.23	8.045	4.18
ENSG00000278864		novel transcript	2.15647322	1.1086738	3.33E-05	0.000648227	yes	up	0.88	0.84	0.91	0.27	1.27	1.74	1.69	1.44	0.725	1.535
ENSG00000143847	PPFIA4	PTPRF interacting protein alpha 4 [Source:HGNC Symbol;Acc:HGNC:9248]	0.529881447	-0.916258481	3.49E-05	0.000676328	yes	down	0.92	0.72	1.65	1.47	0.24	0.65	1.04	0.95	1.19	0.72
ENSG00000177455	CD19	CD19 molecule [Source:HGNC Symbol;Acc:HGNC:1633]	0.477044046	-1.067805618	3.61E-05	0.000696586	yes	down	2.53	3.68	3.15	3.29	1.28	1.13	1.18	1.46	3.1625	1.2625
ENSG00000144130	NT5DC4	5'-nucleotidase domain containing 4 [Source:HGNC Symbol;Acc:HGNC:27678]	0.549517504	-0.863762658	3.74E-05	0.000719572	yes	down	3.82	3.37	8.41	3.66	2.74	1.97	0.77	2.76	4.815	2.06
ENSG00000212123	PRR22	proline rich 22 [Source:HGNC Symbol;Acc:HGNC:28354]	1.781739868	0.833286721	4.23E-05	0.000803864	yes	up	0.75	1.45	1.96	2.21	3.4	2.44	2.43	3.29	1.5925	2.89
ENSG00000257342		novel transcript, antisense to OS9	30.08584857	4.911013143	4.33E-05	0.000821364	yes	up	0	0	0.03	0	0.28	2.13	0.41	0	0.0075	0.705
ENSG00000270066		small Cajal body-specific RNA 2	39.55712435	5.305865646	4.39E-05	0.000832216	yes	up	0	0	0	0	3.02	1.47	2.02	0	0	1.6275
ENSG00000146215	CRIP3	cysteine rich protein 3 [Source:HGNC Symbol;Acc:HGNC:17751]	0.411022221	-1.282711702	4.47E-05	0.00084659	yes	down	2.84	3.31	3.8	3.02	1.49	2.41	0.88	0.85	3.2425	1.4075
ENSG00000090238	YPEL3	yippee like 3 [Source:HGNC Symbol;Acc:HGNC:18327]	0.552495102	-0.85596642	4.52E-05	0.000855284	yes	down	5.98	7.4	4.91	3.74	3.78	2.3	2.32	1.97	5.5075	2.5925
ENSG00000189319	FAM53B	family with sequence similarity 53 member B [Source:HGNC Symbol;Acc:HGNC:28968]	0.578779985	-0.788913063	4.59E-05	0.000865812	yes	down	1.01	0.87	0.55	0.62	0.4	0.29	0.85	0.19	0.7625	0.4325
ENSG00000214837	LINC01347	long intergenic non-protein coding RNA 1347 [Source:HGNC Symbol;Acc:HGNC:50566]	1.506049912	0.590769583	4.83E-05	0.000907939	yes	up	1.21	1.27	1.09	1.39	1.64	1.71	1.87	2.11	1.24	1.8325
ENSG00000183242	WT1-AS	WT1 antisense RNA [Source:HGNC Symbol;Acc:HGNC:18135]	1.561695154	0.643112864	4.88E-05	0.000916515	yes	up	4.94	1.35	2.34	1.72	1.67	4.72	1.82	2.75	2.5875	2.74
ENSG00000180089	TMEM86B	transmembrane protein 86B [Source:HGNC Symbol;Acc:HGNC:28448]	1.818750426	0.862947586	4.88E-05	0.000916292	yes	up	1.61	1.54	1.89	1.08	2.17	2.9	3.92	2.6	1.53	2.8975
ENSG00000205923	CEMP1	cementum protein 1 [Source:HGNC Symbol;Acc:HGNC:32553]	0.657714564	-0.604466478	5.33E-05	0.000995427	yes	down	3.52	5.89	6.81	6.25	4.52	3.09	3.36	3.56	5.6175	3.6325
ENSG00000184908	CLCNKB	chloride voltage-gated channel Kb [Source:HGNC Symbol;Acc:HGNC:2027]	0.37993554	-1.396173422	5.61E-05	0.001042558	yes	down	0.83	1.06	1.6	0.96	0.53	0.76	0.78	0.35	1.1125	0.605
ENSG00000273002	ARHGEF2-AS2	ARHGEF2 antisense RNA 2 [Source:HGNC Symbol;Acc:HGNC:55175]	0.536978563	-0.8970636	5.81E-05	0.001076157	yes	down	1.42	1.88	1.6	1.69	1.03	0.69	0.71	1.04	1.6475	0.8675
ENSG00000064787	BCAS1	brain enriched myelin associated protein 1 [Source:HGNC Symbol;Acc:HGNC:974]	0.582326984	-0.780098622	5.87E-05	0.001086477	yes	down	1.48	1.5	1.44	1.45	0.86	0.72	0.8	0.87	1.4675	0.8125
ENSG00000164236	ANKRD33B	ankyrin repeat domain 33B [Source:HGNC Symbol;Acc:HGNC:35240]	0.66297261	-0.592978827	5.97E-05	0.001103649	yes	down	0.68	0.74	0.72	0.66	0.41	0.4	0.48	0.55	0.7	0.46
ENSG00000285608		novel transcript, antisense to ARHGAP5	0.46761756	-1.096598987	6.10E-05	0.001126083	yes	down	0.66	0.19	0.88	0.64	0.63	0.07	0.38	0	0.5925	0.27
ENSG00000181652	ATG9B	autophagy related 9B [Source:HGNC Symbol;Acc:HGNC:21899]	0.617053205	-0.696533205	6.15E-05	0.001135049	yes	down	3.44	2.77	3.93	3.19	2.61	1.04	3.84	2.81	3.3325	2.575
ENSG00000285571		novel transcript	2.227555808	1.155461577	6.62E-05	0.001212124	yes	up	0.77	1.1	1.04	1.39	1.82	1.81	2.47	3.36	1.075	2.365
ENSG00000230666	CEACAM22P	CEA cell adhesion molecule 22, pseudogene [Source:HGNC Symbol;Acc:HGNC:38029]	0.429555992	-1.2190819	6.91E-05	0.00126226	yes	down	0.71	1.08	0.55	2.13	0.3	0.54	0.35	0.59	1.1175	0.445
ENSG00000257270		novel transcript, antisense to MTA1	4.276451159	2.096414063	7.19E-05	0.001307054	yes	up	1.45	0.42	1.73	0.21	6.56	3.16	2.84	4.11	0.9525	4.1675
ENSG00000170684	ZNF296	zinc finger protein 296 [Source:HGNC Symbol;Acc:HGNC:15981]	0.664635753	-0.589364191	7.31E-05	0.001325565	yes	down	3.76	4.78	4.75	5.19	3.19	3.27	3.51	2.06	4.62	3.0075
ENSG00000116741	RGS2	regulator of G protein signaling 2 [Source:HGNC Symbol;Acc:HGNC:9998]	0.642940683	-0.637242454	7.46E-05	0.001349724	yes	down	5.9	4.76	4.6	5.23	3.27	3.49	2.7	3.38	5.1225	3.21
ENSG00000170122	FOXD4	forkhead box D4 [Source:HGNC Symbol;Acc:HGNC:3805]	1.723860526	0.785643054	7.47E-05	0.001351575	yes	up	1.6	0.6	1.41	1.13	2.5	1.68	1.92	1.98	1.185	2.02
ENSG00000105290	APLP1	amyloid beta precursor like protein 1 [Source:HGNC Symbol;Acc:HGNC:597]	0.6366853	-0.651347639	7.51E-05	0.00135585	yes	down	2.72	5.07	3.28	5.92	1.48	2.6	4.63	1.66	4.2475	2.5925
ENSG00000275454		novel transcript, antisense to IMP3	0.553600064	-0.853083985	7.57E-05	0.001366287	yes	down	4.29	2.37	4.34	2.79	2.08	2.59	1.47	1.35	3.4475	1.8725
ENSG00000115194	SLC30A3	solute carrier family 30 member 3 [Source:HGNC Symbol;Acc:HGNC:11014]	0.581476373	-0.782207522	8.43E-05	0.001510149	yes	down	1.38	1.5	1.16	1.72	0.58	0.87	0.96	1.27	1.44	0.92
ENSG00000260804	LINC01963	long intergenic non-protein coding RNA 1963 [Source:HGNC Symbol;Acc:HGNC:25283]	1.844745124	0.883421503	8.44E-05	0.001510346	yes	up	0.37	0.63	0.61	0.67	1.46	0.88	1.02	0.79	0.57	1.0375
ENSG00000283809		novel protein	0.26421787	-1.920200051	8.68E-05	0.001551138	yes	down	0.7	0	0	1.86	0	0	0.02	0.65	0.64	0.1675
ENSG00000176239	OR51B6	olfactory receptor family 51 subfamily B member 6 [Source:HGNC Symbol;Acc:HGNC:19600]	2.202438651	1.139101833	8.72E-05	0.001557396	yes	up	1.33	1.57	1.61	0.92	2.96	2.55	2.84	3.41	1.3575	2.94
ENSG00000172830	SSH3	slingshot protein phosphatase 3 [Source:HGNC Symbol;Acc:HGNC:30581]	2.740755506	1.454573636	8.89E-05	0.001583063	yes	up	0.45	0.14	0.54	0.15	0.81	0.69	1.82	1.04	0.32	1.09
ENSG00000223799	IL10RB-DT	IL10RB divergent transcript [Source:HGNC Symbol;Acc:HGNC:44303]	2.325004564	1.217233549	8.92E-05	0.001585559	yes	up	0.33	0.39	0.59	0.23	0.59	1.41	0.7	0.88	0.385	0.895
ENSG00000172738	TMEM217	transmembrane protein 217 [Source:HGNC Symbol;Acc:HGNC:21238]	2.106088109	1.074565793	8.99E-05	0.001597913	yes	up	0.69	0.59	0.62	0.73	1.68	1.21	1.11	1.29	0.6575	1.3225
ENSG00000167359	OR51I1	olfactory receptor family 51 subfamily I member 1 [Source:HGNC Symbol;Acc:HGNC:15200]	0.558645727	-0.839994428	9.81E-05	0.001734192	yes	down	5.2	3.88	3.93	6.3	2.51	2.66	2.96	2.41	4.8275	2.635
ENSG00000282936		novel protein	0.299060137	-1.741492475	9.94E-05	0.001755222	yes	down	0.1	0.83	0	0	0.11	0.14	0	0	0.2325	0.0625
ENSG00000215788	TNFRSF25	TNF receptor superfamily member 25 [Source:HGNC Symbol;Acc:HGNC:11910]	5.315157844	2.410112536	0.000100995	0.001781554	yes	up	0.07	0.12	0	0.7	1.09	0.48	0.44	0.49	0.2225	0.625
ENSG00000277117		novel protein, similar to inducible T-cell co-stimulator ligand ICOSLG	2.097699473	1.068808005	0.000106506	0.001870606	yes	up	0.94	0.59	0.18	0.92	0.75	0.77	1.34	1.4	0.6575	1.065
ENSG00000273112		novel transcript, readthrough between FCGR2A and FCGR2C polymormphic pseudogene	0.255718345	-1.967372433	0.000106573	0.001870706	yes	down	88.14	69.31	27.49	61.6	31.55	15.52	13.16	4.11	61.635	16.085
ENSG00000135437	RDH5	retinol dehydrogenase 5 [Source:HGNC Symbol;Acc:HGNC:9940]	2.456039952	1.296334029	0.000113209	0.001975759	yes	up	0.52	1.05	0.3	1.85	1.19	0.74	1.43	2.51	0.93	1.4675
ENSG00000147509	RGS20	regulator of G protein signaling 20 [Source:HGNC Symbol;Acc:HGNC:14600]	0.568980841	-0.813548021	0.000119193	0.002070648	yes	down	3.88	3.33	5.56	4.85	2.31	1.35	1.82	2.3	4.405	1.945
ENSG00000251026	LINC02163	long intergenic non-protein coding RNA 2163 [Source:HGNC Symbol;Acc:HGNC:53024]	0.640325905	-0.643121719	0.000122228	0.00211853	yes	down	8.27	9.03	9.94	7.68	7.09	4.89	5.58	3.94	8.73	5.375
ENSG00000141738	GRB7	growth factor receptor bound protein 7 [Source:HGNC Symbol;Acc:HGNC:4567]	0.63245551	-0.660964097	0.000126511	0.002185891	yes	down	4.09	4.15	2.47	3.16	2.51	1.97	2.17	2.72	3.4675	2.3425
ENSG00000232748		novel transcript, antisense to ZNF668	0.535324391	-0.901514707	0.000127718	0.002203612	yes	down	1.15	0.8	0.69	0.99	0.27	0.6	0.37	0.68	0.9075	0.48
ENSG00000159640	ACE	angiotensin I converting enzyme [Source:HGNC Symbol;Acc:HGNC:2707]	1.579919083	0.659850671	0.000129263	0.002227723	yes	up	0.84	0.75	0.75	1.31	1.72	1.43	1.55	1.36	0.9125	1.515
ENSG00000167550	RHEBL1	RHEB like 1 [Source:HGNC Symbol;Acc:HGNC:21166]	0.619182502	-0.691563394	0.000131939	0.002268049	yes	down	4.68	4.53	5.21	5.93	4.08	3.01	3.13	1.84	5.0875	3.015
ENSG00000007516	BAIAP3	BAI1 associated protein 3 [Source:HGNC Symbol;Acc:HGNC:948]	0.613558463	-0.704727277	0.000135729	0.002327272	yes	down	1.13	0.85	1.97	3.33	0.51	1.45	1.76	1.04	1.82	1.19
ENSG00000255036	SUGT1P4-STRA6LP-CCDC180	SUGT1P4-STRA6LP-CCDC180 readthrough [Source:HGNC Symbol;Acc:HGNC:53835]	1.505980386	0.59070298	0.00013818	0.002367279	yes	up	1.06	0.78	0.63	0.61	1.29	0.88	1.74	1.48	0.77	1.3475
ENSG00000253948	VPS13B-DT	VPS13B divergent transcript [Source:HGNC Symbol;Acc:HGNC:54375]	0.494993534	-1.014518415	0.000138969	0.002380127	yes	down	9.78	8.97	17.96	11.6	3.26	4.88	7.79	4.81	12.0775	5.185
ENSG00000187980	PLA2G2C	phospholipase A2 group IIC [Source:HGNC Symbol;Acc:HGNC:9032]	0.155714753	-2.683022458	0.00014179	0.002422288	yes	down	1.5	1.75	3.71	0.94	0	0.98	0.02	0	1.975	0.25
ENSG00000099822	HCN2	hyperpolarization activated cyclic nucleotide gated potassium and sodium channel 2 [Source:HGNC Symbol;Acc:HGNC:4846]	0.606957086	-0.720333578	0.000141921	0.002423836	yes	down	1.44	1.21	1.31	1.4	0.84	0.63	0.86	0.86	1.34	0.7975
ENSG00000167759	KLK13	kallikrein related peptidase 13 [Source:HGNC Symbol;Acc:HGNC:6361]	1.550158649	0.632415874	0.000144258	0.002460989	yes	up	2.67	2.51	1.92	3.27	3.83	4.28	4.36	4.12	2.5925	4.1475
ENSG00000232347		novel transcript	0.391754487	-1.351978295	0.000148038	0.002522635	yes	down	0.43	0.14	0.11	0.19	0.19	0	0.07	0.07	0.2175	0.0825
ENSG00000232656	IDI2-AS1	IDI2 antisense RNA 1 [Source:HGNC Symbol;Acc:HGNC:30885]	1.549226198	0.631547803	0.000153371	0.002604733	yes	up	1.3	1.98	1.73	2.08	3.01	2.63	2.65	2.72	1.7725	2.7525
ENSG00000140675	SLC5A2	solute carrier family 5 member 2 [Source:HGNC Symbol;Acc:HGNC:11037]	3.715343439	1.893495577	0.000153397	0.002604435	yes	up	0.16	0.06	0	0.21	0.3	0.87	0.52	0.18	0.1075	0.4675
ENSG00000236423	LINC01134	long intergenic non-protein coding RNA 1134 [Source:HGNC Symbol;Acc:HGNC:49449]	3.75338963	1.90819406	0.000162635	0.002750509	yes	up	0.09	0.16	0.19	0.02	0.14	1.64	0.42	0.7	0.115	0.725
ENSG00000165633	VSTM4	V-set and transmembrane domain containing 4 [Source:HGNC Symbol;Acc:HGNC:26470]	1.506252366	0.590963508	0.000163781	0.002767585	yes	up	0.95	0.7	0.66	0.78	0.86	0.86	1.17	1.24	0.7725	1.0325
ENSG00000260879		novel transcript, antisense to SLC25A24	0.029009394	-5.107336027	0.000164265	0.002774213	yes	down	0	0.38	0.37	0	0	0	0	0	0.1875	0
ENSG00000109906	ZBTB16	zinc finger and BTB domain containing 16 [Source:HGNC Symbol;Acc:HGNC:12930]	0.545052428	-0.875533087	0.000170097	0.002858386	yes	down	0.98	0.72	1.2	0.75	0.21	0.27	0.41	0.53	0.9125	0.355
ENSG00000127364	TAS2R4	taste 2 receptor member 4 [Source:HGNC Symbol;Acc:HGNC:14911]	1.601224052	0.679175191	0.00017206	0.002886581	yes	up	0.66	0.71	0.48	0.55	0.95	0.92	0.83	1.06	0.6	0.94
ENSG00000197599	CCDC154	coiled-coil domain containing 154 [Source:HGNC Symbol;Acc:HGNC:34454]	3.373450253	1.754224887	0.000172552	0.002894034	yes	up	0.1	0.24	0.42	0.06	0.86	0.82	1	0.84	0.205	0.88
ENSG00000234185		novel transcript	2.691360968	1.4283359	0.000176496	0.002951202	yes	up	0	0.32	0.62	0.18	0.64	0.59	0.6	1.59	0.28	0.855
ENSG00000164061	BSN	bassoon presynaptic cytomatrix protein [Source:HGNC Symbol;Acc:HGNC:1117]	1.521900157	0.605873715	0.000178933	0.002990294	yes	up	0.23	0.21	0.21	0.26	0.38	0.25	0.36	0.37	0.2275	0.34
ENSG00000280239		TEC	1.735862451	0.795652634	0.000181734	0.003031257	yes	up	1.14	1.41	0.7	1.19	2.32	1.65	1.46	2.09	1.11	1.88
ENSG00000181619	GPR135	G protein-coupled receptor 135 [Source:HGNC Symbol;Acc:HGNC:19991]	1.639122372	0.712923566	0.000182558	0.003043331	yes	up	0.6	0.73	0.66	0.65	1.28	1.09	1.26	1.25	0.66	1.22
ENSG00000131746	TNS4	tensin 4 [Source:HGNC Symbol;Acc:HGNC:24352]	0.579418024	-0.787323531	0.000182858	0.003047499	yes	down	0.85	1.32	1.09	0.99	0.57	0.67	0.48	0.89	1.0625	0.6525
ENSG00000285853		novel transcript	8.234212293	3.041630644	0.00018756	0.003117298	yes	up	0	0.15	0	0	0.26	0.41	0.42	0.23	0.0375	0.33
ENSG00000284554		novel protein	0.029711405	-5.072839347	0.000191945	0.003184935	yes	down	0	0	0	0.52	0	0	0	0	0.13	0
ENSG00000082196	C1QTNF3	C1q and TNF related 3 [Source:HGNC Symbol;Acc:HGNC:14326]	1.741758108	0.800544279	0.000206641	0.003408283	yes	up	1.41	1.21	1.32	1.6	3.21	2.66	1.66	2.89	1.385	2.605
ENSG00000188766	SPRED3	sprouty related EVH1 domain containing 3 [Source:HGNC Symbol;Acc:HGNC:31041]	3.180843446	1.669409367	0.000211804	0.003484915	yes	up	0.76	0.04	0.07	0.03	0.67	0.37	0.36	0.42	0.225	0.455
ENSG00000164294	GPX8	glutathione peroxidase 8 (putative) [Source:HGNC Symbol;Acc:HGNC:33100]	0.358788296	-1.478795267	0.000217356	0.003568523	yes	down	1.69	1.01	0.66	0.35	0.28	0.21	0.67	1.22	0.9275	0.595
ENSG00000171790	SLFNL1	schlafen like 1 [Source:HGNC Symbol;Acc:HGNC:26313]	2.437990218	1.285692337	0.000217828	0.003575296	yes	up	0.12	0.1	0.17	0.18	0.24	0.56	0.37	0.29	0.1425	0.365
ENSG00000179111	HES7	hes family bHLH transcription factor 7 [Source:HGNC Symbol;Acc:HGNC:15977]	0.336356857	-1.571935426	0.000221245	0.003628438	yes	down	1.1	1	0.92	0.79	0.2	0.43	0.1	0.69	0.9525	0.355
ENSG00000065534	MYLK	myosin light chain kinase [Source:HGNC Symbol;Acc:HGNC:7590]	1.828112375	0.870354757	0.000222203	0.003641196	yes	up	0.53	0.53	0.26	0.51	0.39	0.31	0.49	0.63	0.4575	0.455
ENSG00000274391	TPTE	transmembrane phosphatase with tensin homology [Source:HGNC Symbol;Acc:HGNC:12023]	2.483015109	1.312093041	0.000223265	0.00365762	yes	up	0.6	0	0.52	0.42	0.75	0.91	0.93	0.31	0.385	0.725
ENSG00000243960		novel transcript	33.21437101	5.053735689	0.000224468	0.003676328	yes	up	0	0	0	0	0.76	0	0	1.25	0	0.5025
ENSG00000186583	SPATC1	spermatogenesis and centriole associated 1 [Source:HGNC Symbol;Acc:HGNC:30510]	2.162422984	1.112648752	0.000227276	0.003715304	yes	up	3.14	2.8	2.76	1.14	4.45	2.78	5.27	4.43	2.46	4.2325
ENSG00000123407	HOXC12	homeobox C12 [Source:HGNC Symbol;Acc:HGNC:5124]	1.756055154	0.812338158	0.000232072	0.003787577	yes	up	0.52	0.6	0.61	0.62	0.79	1.16	1.1	1.03	0.5875	1.02
ENSG00000115380	EFEMP1	EGF containing fibulin extracellular matrix protein 1 [Source:HGNC Symbol;Acc:HGNC:3218]	0.603574642	-0.7283959	0.000241	0.003918525	yes	down	1.87	2.15	1.95	2.97	1.22	1.87	1.02	1.01	2.235	1.28
ENSG00000256040	PAPPA-AS1	PAPPA antisense RNA 1 [Source:HGNC Symbol;Acc:HGNC:35152]	4.035243015	2.01265556	0.000241938	0.003932727	yes	up	0.3	0	0.02	0	0.48	0.1	0.63	0.1	0.08	0.3275
ENSG00000250397		novel transcript	2.977525078	1.574113659	0.000242496	0.003939679	yes	up	0.13	0.14	0.26	0.22	0.67	0.23	0.49	0.88	0.1875	0.5675
ENSG00000251141	MRPS30-DT	MRPS30 divergent transcript [Source:HGNC Symbol;Acc:HGNC:53420]	0.612758899	-0.706608564	0.000244227	0.003964627	yes	down	5.47	12.01	3.51	3.51	1.57	3.94	2.32	3.25	6.125	2.77
ENSG00000287398		novel transcript	1.662698517	0.7335266	0.000245486	0.003982924	yes	up	0	4.16	4.47	4.13	5.44	5.82	2.86	7.05	3.19	5.2925
ENSG00000124507	PACSIN1	protein kinase C and casein kinase substrate in neurons 1 [Source:HGNC Symbol;Acc:HGNC:8570]	0.584961274	-0.773586977	0.000245975	0.003987669	yes	down	0.98	0.99	0.69	0.93	0.54	0.41	0.56	0.43	0.8975	0.485
ENSG00000099860	GADD45B	growth arrest and DNA damage inducible beta [Source:HGNC Symbol;Acc:HGNC:4096]	0.482339934	-1.051877836	0.000249822	0.004044623	yes	down	1.8	1.8	2.15	1.37	0.65	0.61	1.32	0.92	1.78	0.875
ENSG00000143341	HMCN1	hemicentin 1 [Source:HGNC Symbol;Acc:HGNC:19194]	1.824163342	0.867234919	0.000250689	0.004055414	yes	up	0.07	0.06	0.12	0.19	0.23	0.17	0.2	0.5	0.11	0.275
ENSG00000182472	CAPN12	calpain 12 [Source:HGNC Symbol;Acc:HGNC:13249]	0.558257738	-0.840996751	0.000253577	0.004094488	yes	down	2.53	6.27	4.13	3.79	1.78	1.15	2.04	2.21	4.18	1.795
ENSG00000267243		novel transcript	0.405150605	-1.303469801	0.000261384	0.004213821	yes	down	1.68	3.13	4.26	3.85	1.31	1.24	1.08	1.32	3.23	1.2375
ENSG00000115290	GRB14	growth factor receptor bound protein 14 [Source:HGNC Symbol;Acc:HGNC:4565]	0.425005635	-1.234446127	0.000281364	0.004507176	yes	down	1.76	0.71	1.13	1.66	0.92	0.15	0.45	0.48	1.315	0.5
ENSG00000287296		novel transcript, antisense to IER2	32.1965643	5.008834841	0.000283889	0.004542821	yes	up	0	0	0	0	0	0.25	1.97	0	0	0.555
ENSG00000205269	TMEM170B	transmembrane protein 170B [Source:HGNC Symbol;Acc:HGNC:34244]	3.201650721	1.678815928	0.000287008	0.004586687	yes	up	0.06	0	0.03	0.05	0.09	0.16	0.09	0.09	0.035	0.1075
ENSG00000249816	LINC00964	long intergenic non-protein coding RNA 964 [Source:HGNC Symbol;Acc:HGNC:27226]	0.541132502	-0.885946199	0.00029071	0.004642185	yes	down	4.29	3.09	2.73	4.26	2.05	1.18	2.06	1.66	3.5925	1.7375
ENSG00000230087		amphiphysin (Stiff-Man syndrome with breast cancer 128kDa autoantigen) (AMPH) pseudogene	2.365040413	1.241864836	0.000292482	0.004669251	yes	up	1.25	1.1	0.66	0.9	2.11	2.48	2.7	1.75	0.9775	2.26
ENSG00000288622	PDCD6-AHRR	PDCD6-AHRR readthrough (NMD candidate) [Source:HGNC Symbol;Acc:HGNC:54724]	1.528561491	0.61217459	0.000307687	0.004891385	yes	up	1.45	1.49	1.22	1.68	2.59	2.14	1.93	2.5	1.46	2.29
ENSG00000287593		novel transcript, antisense to ADTRP	0.221915562	-2.171917254	0.000308058	0.004894717	yes	down	0.44	0.91	0.58	0	0.27	0	0	0.07	0.4825	0.085
ENSG00000286619		novel transcript, antisense to PM20D1	0.645366567	-0.631809254	0.000308842	0.004905882	yes	down	2.35	1.49	2.31	2.22	1.51	1.39	1.35	1.15	2.0925	1.35
ENSG00000134242	PTPN22	protein tyrosine phosphatase non-receptor type 22 [Source:HGNC Symbol;Acc:HGNC:9652]	0.267254579	-1.903713427	0.000316512	0.005015913	yes	down	1.24	0.18	0.33	0.34	0.11	0.1	0.05	0.07	0.5225	0.0825
ENSG00000185924	RTN4RL1	reticulon 4 receptor like 1 [Source:HGNC Symbol;Acc:HGNC:21329]	0.382637696	-1.385949086	0.000317457	0.005029565	yes	down	0.32	0.39	0.31	0.41	0.09	0.11	0.16	0.18	0.3575	0.135
ENSG00000162188	GNG3	G protein subunit gamma 3 [Source:HGNC Symbol;Acc:HGNC:4405]	3.362300137	1.749448513	0.000320251	0.00506854	yes	up	0.2	0.21	0.63	0.59	1.43	1.19	1.45	1.51	0.4075	1.395
ENSG00000100346	CACNA1I	calcium voltage-gated channel subunit alpha1 I [Source:HGNC Symbol;Acc:HGNC:1396]	2.481248249	1.311066084	0.00033049	0.005212916	yes	up	0.04	0.06	0.05	0.06	0.16	0.15	0.09	0.13	0.0525	0.1325
ENSG00000170835	CEL	carboxyl ester lipase [Source:HGNC Symbol;Acc:HGNC:1848]	2.203447865	1.139762762	0.000331033	0.005218756	yes	up	0.4	0.35	0.42	0.24	0.9	0.86	0.67	0.64	0.3525	0.7675
ENSG00000258986	TMEM179	transmembrane protein 179 [Source:HGNC Symbol;Acc:HGNC:20137]	2.222397038	1.152116582	0.000346955	0.005449941	yes	up	0.42	0.34	0.2	0.28	0.63	0.51	0.6	0.67	0.31	0.6025
ENSG00000112182	BACH2	BTB domain and CNC homolog 2 [Source:HGNC Symbol;Acc:HGNC:14078]	1.645273058	0.718327041	0.00034992	0.005489405	yes	up	0.44	0.6	0.59	0.61	0.91	0.4	0.74	0.72	0.56	0.6925
ENSG00000100100	PIK3IP1	phosphoinositide-3-kinase interacting protein 1 [Source:HGNC Symbol;Acc:HGNC:24942]	0.501537777	-0.995569723	0.000351135	0.00550562	yes	down	0.92	0.97	0.94	0.88	0.47	0.42	0.4	0.52	0.9275	0.4525
ENSG00000152503	TRIM36	tripartite motif containing 36 [Source:HGNC Symbol;Acc:HGNC:16280]	0.604396586	-0.726432584	0.000352711	0.005527474	yes	down	1.35	1.76	1.45	1.13	0.71	1.2	0.47	0.95	1.4225	0.8325
ENSG00000261312		novel transcript, antisense to C16orf88	0.031270415	-4.999057832	0.000365303	0.005708587	yes	down	0.32	0.51	0	0	0	0	0	0	0.2075	0
ENSG00000136367	ZFHX2	zinc finger homeobox 2 [Source:HGNC Symbol;Acc:HGNC:20152]	3.024483428	1.596688756	0.000366036	0.005718572	yes	up	0.03	0.11	0.07	0.01	0.11	0.14	0.22	0.1	0.055	0.1425
ENSG00000113430	IRX4	iroquois homeobox 4 [Source:HGNC Symbol;Acc:HGNC:6129]	0.358590755	-1.4795898	0.000371369	0.005794428	yes	down	0.55	0.67	0.44	0.78	0.11	0.28	0.33	0.19	0.61	0.2275
ENSG00000101898	MCTS2P	MCTS family member 2, pseudogene [Source:HGNC Symbol;Acc:HGNC:49760]	2.609920247	1.384005722	0.000372594	0.005810547	yes	up	0	0.32	1.65	2.21	1.88	2.58	3.55	3.12	1.045	2.7825
ENSG00000116833	NR5A2	nuclear receptor subfamily 5 group A member 2 [Source:HGNC Symbol;Acc:HGNC:7984]	0.339632234	-1.557954705	0.0003742	0.005829601	yes	down	0.17	0.25	0.25	0.2	0.08	0.08	0.07	0.07	0.2175	0.075
ENSG00000283235		novel transcript	0.611595177	-0.709351065	0.000377279	0.005871534	yes	down	7.6	6.5	7.49	4.94	3.32	5.04	4.21	6.85	6.6325	4.855
ENSG00000266469		novel transcript, antisense to MED1 & FBXL20	0.572384594	-0.804943254	0.00037828	0.005885612	yes	down	7.28	5.79	4.19	2.44	2.18	2.5	4.14	2.13	4.925	2.7375
ENSG00000169169	CPT1C	carnitine palmitoyltransferase 1C [Source:HGNC Symbol;Acc:HGNC:18540]	0.31086938	-1.685619573	0.000383257	0.005955406	yes	down	1.58	2.56	1.98	1.08	0.41	0.27	0.51	0.96	1.8	0.5375
ENSG00000189014	SHLD2P3	shieldin complex subunit 2 pseudogene 3 [Source:HGNC Symbol;Acc:HGNC:34038]	30.94108447	4.951451858	0.000396002	0.006133025	yes	up	0	0	0	0	0	0.03	0.11	0.21	0	0.0875
ENSG00000272449		novel transcript	0.523415445	-0.933971599	0.000400427	0.006195225	yes	down	2.21	2.65	2.63	3.48	1.36	1.51	1.34	1.3	2.7425	1.3775
ENSG00000179168	GGN	gametogenetin [Source:HGNC Symbol;Acc:HGNC:18869]	3.634276104	1.861668028	0.000417508	0.00643652	yes	up	0.09	0.17	0.03	0.53	0.55	0.45	0.67	0.45	0.205	0.53
ENSG00000158246	TENT5B	terminal nucleotidyltransferase 5B [Source:HGNC Symbol;Acc:HGNC:28273]	0.37325913	-1.421750544	0.000423592	0.00652202	yes	down	0.2	0.65	0.59	0.64	0.14	0.28	0.22	0.12	0.52	0.19
ENSG00000163909	HEYL	hes related family bHLH transcription factor with YRPW motif like [Source:HGNC Symbol;Acc:HGNC:4882]	0.648924911	-0.623876546	0.000426457	0.006564471	yes	down	0.97	1.38	1.14	1.35	0.76	0.73	0.74	0.86	1.21	0.7725
ENSG00000248713	C4orf54	chromosome 4 open reading frame 54 [Source:HGNC Symbol;Acc:HGNC:27741]	0.129936299	-2.944123579	0.000435292	0.006691983	yes	down	0.02	0.04	0.05	0.06	0	0	0	0.02	0.0425	0.005
ENSG00000110944	IL23A	interleukin 23 subunit alpha [Source:HGNC Symbol;Acc:HGNC:15488]	0.483290103	-1.049038645	0.000436132	0.006699803	yes	down	3.63	4.07	2.47	3.77	1.43	1.49	1.19	2.41	3.485	1.63
ENSG00000258701	LINC00638	long intergenic non-protein coding RNA 638 [Source:HGNC Symbol;Acc:HGNC:28325]	3.108365579	1.636156191	0.000442674	0.006796858	yes	up	0.13	0.22	0.05	0.13	0.36	0.31	0.57	0.35	0.1325	0.3975
ENSG00000287176		novel transcript	0.609849904	-0.713473883	0.000453151	0.006940156	yes	down	3.2	2.53	2.85	2.33	1.63	1.52	1.93	1.4	2.7275	1.62
ENSG00000141404	GNAL	G protein subunit alpha L [Source:HGNC Symbol;Acc:HGNC:4388]	1.643631754	0.716887108	0.000466534	0.007112792	yes	up	0.32	0.38	0.42	0.38	0.54	0.61	0.59	0.69	0.375	0.6075
ENSG00000268083		novel protein	0.033718198	-4.890328748	0.000466905	0.007114874	yes	down	0	0	1.15	0	0	0	0	0	0.2875	0
ENSG00000108352	RAPGEFL1	Rap guanine nucleotide exchange factor like 1 [Source:HGNC Symbol;Acc:HGNC:17428]	1.626785495	0.702024033	0.000467806	0.007125029	yes	up	0.95	0.92	0.68	1.76	1.31	1.73	1.32	1.65	1.0775	1.5025
ENSG00000100036	SLC35E4	solute carrier family 35 member E4 [Source:HGNC Symbol;Acc:HGNC:17058]	0.586176595	-0.770592731	0.000475193	0.007226649	yes	down	1.35	1.51	1.2	1.34	0.74	0.75	0.97	0.61	1.35	0.7675
ENSG00000204264	PSMB8	proteasome 20S subunit beta 8 [Source:HGNC Symbol;Acc:HGNC:9545]	0.420866678	-1.248564804	0.000475893	0.007235486	yes	down	1.44	1.72	1.07	1.54	0.67	0.33	0.76	0.42	1.4425	0.545
ENSG00000134817	APLNR	apelin receptor [Source:HGNC Symbol;Acc:HGNC:339]	0.391262816	-1.353790087	0.00047957	0.007287737	yes	down	0.47	0.39	0.36	0.5	0.18	0.09	0.19	0.09	0.43	0.1375
ENSG00000261063		novel transcript, antisense to MON1B & SYCE1L	0.143606561	-2.799806434	0.000494911	0.007496457	yes	down	0	0	3.28	1.85	0.21	0	0.44	0	1.2825	0.1625
ENSG00000122863	CHST3	carbohydrate sulfotransferase 3 [Source:HGNC Symbol;Acc:HGNC:1971]	1.979361377	0.985035033	0.000495676	0.007506158	yes	up	0.2	0.15	0.13	0.14	0.31	0.25	0.34	0.31	0.155	0.3025
ENSG00000106991	ENG	endoglin [Source:HGNC Symbol;Acc:HGNC:3349]	0.521124893	-0.940298923	0.000502717	0.007605191	yes	down	0.6	0.87	1.24	0.92	0.64	0.85	1.28	0.74	0.9075	0.8775
ENSG00000198873	GRK5	G protein-coupled receptor kinase 5 [Source:HGNC Symbol;Acc:HGNC:4544]	0.57850888	-0.789588991	0.000530195	0.007985047	yes	down	0.33	0.47	0.47	0.49	0.32	0.18	0.22	0.28	0.44	0.25
ENSG00000236552	RPL13AP5	ribosomal protein L13a pseudogene 5 [Source:HGNC Symbol;Acc:HGNC:23736]	29.27208886	4.871453795	0.000533072	0.008022396	yes	up	0	0	0	0	1.1	0	0.6	0.58	0	0.57
ENSG00000264304		novel transcript, antisense to FLOT2	13.43189502	3.747590955	0.000534338	0.008037463	yes	up	0.2	0	0	0	0.95	1.61	0.96	0.2	0.05	0.93
ENSG00000239626	RPSAP41	ribosomal protein SA pseudogene 41 [Source:HGNC Symbol;Acc:HGNC:36663]	29.33808526	4.874702812	0.000536681	0.008068696	yes	up	0	0	0	0	0	0.97	0.17	0.23	0	0.3425
ENSG00000004939	SLC4A1	solute carrier family 4 member 1 (Diego blood group) [Source:HGNC Symbol;Acc:HGNC:11027]	1.559814717	0.641374668	0.000542647	0.008152343	yes	up	0.42	0.67	0.85	0.57	1.16	1.19	0.9	0.91	0.6275	1.04
ENSG00000260566		novel transcript	2.093364932	1.065823836	0.000552875	0.008289574	yes	up	0.24	0.26	0.3	0.5	0.5	0.64	0.77	0.8	0.325	0.6775
ENSG00000229211	KCTD9P6	potassium channel tetramerization domain containing 9 pseudogene 6 [Source:HGNC Symbol;Acc:HGNC:49915]	0.207536903	-2.268560206	0.000585418	0.008717179	yes	down	1.03	10.03	5.15	3.9	0.08	1.28	0	0.18	5.0275	0.385
ENSG00000249790		novel transcript	0.658987808	-0.601676321	0.000586613	0.008730694	yes	down	6.91	4.96	6.12	5.1	4.58	3.14	2.48	3.92	5.7725	3.53
ENSG00000254740		novel transcript, antisense to USP2	0.033808829	-4.886456138	0.00059135	0.008790405	yes	down	1.65	0	0	0	0	0	0	0	0.4125	0
ENSG00000181885	CLDN7	claudin 7 [Source:HGNC Symbol;Acc:HGNC:2049]	0.606808318	-0.720687234	0.00060291	0.008946896	yes	down	4.09	4.8	3.75	3.69	2.54	3.18	3.65	1.83	4.0825	2.8
ENSG00000099834	CDHR5	cadherin related family member 5 [Source:HGNC Symbol;Acc:HGNC:7521]	2.768512072	1.469110813	0.00060589	0.008986727	yes	up	0.11	0.15	0.11	0.14	0.26	0.51	0.48	0.29	0.1275	0.385
ENSG00000274213		novel transcript	0.461060768	-1.116971184	0.000624061	0.009217928	yes	down	19.72	14.02	15.03	13.64	11.01	5.87	6.94	4.08	15.6025	6.975
ENSG00000135185	TMEM243	transmembrane protein 243 [Source:HGNC Symbol;Acc:HGNC:21707]	0.629876005	-0.666860242	0.000627614	0.009261386	yes	down	4.12	4.06	4.79	5.26	3.37	3.57	2.54	2.01	4.5575	2.8725
ENSG00000243509	TNFRSF6B	TNF receptor superfamily member 6b [Source:HGNC Symbol;Acc:HGNC:11921]	4.696077548	2.231456232	0.000631439	0.009308782	yes	up	0.26	0	0.23	0	0.74	0.07	0	1.63	0.1225	0.61
ENSG00000167968	DNASE1L2	deoxyribonuclease 1 like 2 [Source:HGNC Symbol;Acc:HGNC:2958]	1.733398734	0.793603556	0.00064593	0.009497016	yes	up	1.37	1.7	1.56	1.49	2.82	2.78	2.8	2.4	1.53	2.7
ENSG00000180096	SEPTIN1	septin 1 [Source:HGNC Symbol;Acc:HGNC:2879]	0.618706387	-0.692673168	0.000648229	0.009528515	yes	down	3.79	4.16	3.2	3.17	2.32	2.86	1.27	1.71	3.58	2.04
ENSG00000197165	SULT1A2	sulfotransferase family 1A member 2 [Source:HGNC Symbol;Acc:HGNC:11454]	0.58457736	-0.774534139	0.000651555	0.009570445	yes	down	2.39	2.07	2.66	2.37	2.19	1.18	1.73	0.63	2.3725	1.4325
ENSG00000259030	FPGT-TNNI3K	FPGT-TNNI3K readthrough [Source:HGNC Symbol;Acc:HGNC:42952]	8.768505567	3.132330982	0.000656328	0.00963589	yes	up	0.02	0	0	0	0.43	0	1.4	1.82	0.005	0.9125
ENSG00000102554	KLF5	Kruppel like factor 5 [Source:HGNC Symbol;Acc:HGNC:6349]	0.646297074	-0.629730634	0.000658236	0.009659224	yes	down	1.34	1.22	1.49	1.6	0.73	1.07	1.06	0.93	1.4125	0.9475
ENSG00000247095	MIR210HG	MIR210 host gene [Source:HGNC Symbol;Acc:HGNC:39524]	0.555677016	-0.847681526	0.000663784	0.009724164	yes	down	5.16	4.73	3.52	2.41	2.59	4.08	3.26	0.94	3.955	2.7175
ENSG00000197696	NMB	neuromedin B [Source:HGNC Symbol;Acc:HGNC:7842]	0.035033433	-4.835123835	0.000698058	0.010172233	yes	down	0.23	0.49	0.27	0.57	0	0	0	0	0.39	0
ENSG00000221869	CEBPD	CCAAT enhancer binding protein delta [Source:HGNC Symbol;Acc:HGNC:1835]	0.655603272	-0.609105041	0.00070943	0.01032554	yes	down	4.84	5.29	4.38	3.53	3.37	2.57	2.19	3.45	4.51	2.895
ENSG00000245748		novel transcript, antisense to TBC1D14 and TADA2B	2.464993457	1.301583817	0.000710577	0.010339753	yes	up	0.29	0	0.17	0	0.34	0.24	0.29	0.27	0.115	0.285
ENSG00000130700	GATA5	GATA binding protein 5 [Source:HGNC Symbol;Acc:HGNC:15802]	1.577642537	0.657770356	0.000746729	0.010826863	yes	up	1.22	0.98	1.22	0.82	1.93	1.48	1.32	1.85	1.06	1.645
ENSG00000162415	ZSWIM5	zinc finger SWIM-type containing 5 [Source:HGNC Symbol;Acc:HGNC:29299]	1.798441687	0.846747382	0.000747699	0.010838333	yes	up	0.34	0.13	0.23	0.24	0.58	0.39	0.32	0.41	0.235	0.425
ENSG00000275400		translocase of outer mitochondrial membrane 20 homolog (yeast) (TOMM20) pseudogene	4.791061152	2.260345228	0.000786187	0.011328567	yes	up	0.65	0	0	2.21	7.43	1.41	2.65	2.56	0.715	3.5125
ENSG00000116106	EPHA4	EPH receptor A4 [Source:HGNC Symbol;Acc:HGNC:3388]	0.198056262	-2.336017778	0.000790754	0.01137816	yes	down	0.29	0.15	0.14	0.26	0.02	0.42	0.02	0.02	0.21	0.12
ENSG00000101489	CELF4	CUGBP Elav-like family member 4 [Source:HGNC Symbol;Acc:HGNC:14015]	0.538163281	-0.893884137	0.000793527	0.011412648	yes	down	2.63	1.32	2.07	3.06	1.34	1.91	0.8	0.82	2.27	1.2175
ENSG00000268573		novel transcript	0.347798325	-1.52367711	0.000793682	0.011412162	yes	down	0	0.56	0.34	0	0	0	0	0.31	0.225	0.0775
ENSG00000220201	ZGLP1	zinc finger GATA like protein 1 [Source:HGNC Symbol;Acc:HGNC:37245]	1.58099895	0.66083641	0.000815493	0.011706353	yes	up	1.63	2.64	2.04	3.29	3.47	3.1	4.39	4	2.4	3.74
ENSG00000166147	FBN1	fibrillin 1 [Source:HGNC Symbol;Acc:HGNC:3603]	0.542975096	-0.881042066	0.000816048	0.011711555	yes	down	1.75	0.79	0.36	0.81	0.68	0.19	0.33	0.38	0.9275	0.395
ENSG00000101306	MYLK2	myosin light chain kinase 2 [Source:HGNC Symbol;Acc:HGNC:16243]	2.76625728	1.467935343	0.000828217	0.011877762	yes	up	0.28	0.14	0.18	0.12	0.7	0.52	0.32	0.55	0.18	0.5225
ENSG00000023445	BIRC3	baculoviral IAP repeat containing 3 [Source:HGNC Symbol;Acc:HGNC:591]	0.574712351	-0.79908804	0.000898249	0.012803432	yes	down	0.8	0.96	0.77	1	0.42	0.54	0.29	0.41	0.8825	0.415
ENSG00000184545	DUSP8	dual specificity phosphatase 8 [Source:HGNC Symbol;Acc:HGNC:3074]	0.623543659	-0.681437517	0.000916554	0.013030664	yes	down	1.54	1.35	1.7	1.3	0.65	0.4	1.3	0.58	1.4725	0.7325
ENSG00000267343	ZNF833P	zinc finger protein 833, pseudogene [Source:HGNC Symbol;Acc:HGNC:33819]	2.712688996	1.439723655	0.000932643	0.013225306	yes	up	0	0.51	0.27	0.34	0.85	1.01	0.26	0.88	0.28	0.75
ENSG00000144648	ACKR2	atypical chemokine receptor 2 [Source:HGNC Symbol;Acc:HGNC:1565]	0.60407959	-0.727189452	0.000934349	0.01324331	yes	down	1.81	0.95	1.2	1.41	1.46	0.77	0.61	0.8	1.3425	0.91
ENSG00000196689	TRPV1	transient receptor potential cation channel subfamily V member 1 [Source:HGNC Symbol;Acc:HGNC:12716]	2.764416357	1.466974921	0.000934905	0.013248095	yes	up	0.16	0.05	0.06	0.06	0.4	0.21	0.22	0.25	0.0825	0.27
ENSG00000254413	CHKB-CPT1B	CHKB-CPT1B readthrough (NMD candidate) [Source:HGNC Symbol;Acc:HGNC:41998]	1.589613496	0.668676026	0.000939283	0.013297709	yes	up	1.11	0.56	0.67	1.05	0.97	0.88	0.96	0.65	0.8475	0.865
ENSG00000035720	STAP1	signal transducing adaptor family member 1 [Source:HGNC Symbol;Acc:HGNC:24133]	0.46876404	-1.093066194	0.000955864	0.013504081	yes	down	1.61	1.06	1.08	1.07	0.44	0.64	0.49	0.34	1.205	0.4775
ENSG00000159176	CSRP1	cysteine and glycine rich protein 1 [Source:HGNC Symbol;Acc:HGNC:2469]	0.037247023	-4.746731056	0.000990851	0.013946403	yes	down	0.38	0.25	0.03	0.36	0	0	0	0	0.255	0
ENSG00000198010	DLGAP2	DLG associated protein 2 [Source:HGNC Symbol;Acc:HGNC:2906]	0.439807959	-1.185054382	0.000995429	0.014004333	yes	down	3.12	1.02	2	1.42	0.68	0.62	0.95	0.99	1.89	0.81
ENSG00000204934	ATP6V0E2-AS1	ATP6V0E2 antisense RNA 1 [Source:HGNC Symbol;Acc:HGNC:44180]	1.648907919	0.721510836	0.001012536	0.014212046	yes	up	0.49	0.92	0.79	0.54	1.28	0.91	1.02	1.22	0.685	1.1075
ENSG00000127588	GNG13	G protein subunit gamma 13 [Source:HGNC Symbol;Acc:HGNC:14131]	3.336034124	1.738134046	0.001036586	0.014509341	yes	up	0.08	0.26	0.69	0.08	0.89	1.17	0.65	1.18	0.2775	0.9725
ENSG00000138759	FRAS1	Fraser extracellular matrix complex subunit 1 [Source:HGNC Symbol;Acc:HGNC:19185]	25.93665436	4.696920489	0.001039253	0.014539953	yes	up	0	0	0	0	1.01	0.01	0.01	0.01	0	0.26
ENSG00000130943	PKDREJ	polycystin family receptor for egg jelly [Source:HGNC Symbol;Acc:HGNC:9015]	2.875907211	1.524017129	0.001043899	0.014591497	yes	up	0.05	0.08	0.01	0.03	0.05	0.14	0.11	0.17	0.0425	0.1175
ENSG00000179673	RPRML	reprimo like [Source:HGNC Symbol;Acc:HGNC:32422]	0.037595896	-4.733280996	0.001052831	0.014706185	yes	down	0.36	0.37	0.06	0.12	0	0	0	0	0.2275	0
ENSG00000270127		novel transcript	1.582885965	0.662557323	0.001095205	0.015210514	yes	up	0.89	1.72	1.14	0.56	1.56	1.85	1.66	1.6	1.0775	1.6675
ENSG00000250620	LINC02515	long intergenic non-protein coding RNA 2515 [Source:HGNC Symbol;Acc:HGNC:53504]	0.543602737	-0.879375374	0.001098553	0.015253512	yes	down	1.31	0.12	1.31	1.03	0.71	0.36	0.26	0.72	0.9425	0.5125
ENSG00000215458	AATBC	apoptosis associated transcript in bladder cancer [Source:HGNC Symbol;Acc:HGNC:51526]	1.995749517	0.996930662	0.001104904	0.015327674	yes	up	0.37	0.59	0.45	0.65	0.5	0.87	0.75	0.65	0.515	0.6925
ENSG00000164056	SPRY1	sprouty RTK signaling antagonist 1 [Source:HGNC Symbol;Acc:HGNC:11269]	0.604358238	-0.726524124	0.001111348	0.015406497	yes	down	1.45	1.37	2.2	1.74	0.9	0.84	1.51	1.22	1.69	1.1175
ENSG00000279667		TEC	3.512532192	1.812511448	0.001114934	0.01544915	yes	up	0.24	0.08	0.63	0	0.69	0.8	0.55	1.47	0.2375	0.8775
ENSG00000176595	KBTBD11	kelch repeat and BTB domain containing 11 [Source:HGNC Symbol;Acc:HGNC:29104]	25.65026184	4.680901648	0.00111732	0.015478671	yes	up	0	0	0	0	0.02	0.04	0.02	0.03	0	0.0275
ENSG00000285897		novel transcript	0.286103403	-1.805391436	0.001122199	0.015539163	yes	down	0.15	0.1	0.13	0.1	0.07	0	0.06	0	0.12	0.0325
ENSG00000258677		novel protein, UBE2W-STAU2 readthrough	4.455508191	2.155589994	0.001131822	0.015647417	yes	up	0	0	0.78	0	1.48	1.02	0.45	0.9	0.195	0.9625
ENSG00000185112	FAM43A	family with sequence similarity 43 member A [Source:HGNC Symbol;Acc:HGNC:26888]	0.247440189	-2.014848252	0.001134666	0.015672439	yes	down	0.19	0.11	0.2	0.29	0.08	0	0.02	0.09	0.1975	0.0475
ENSG00000071909	MYO3B	myosin IIIB [Source:HGNC Symbol;Acc:HGNC:15576]	0.576626112	-0.794291926	0.001168316	0.016085951	yes	down	0.37	0.58	0.47	0.46	0.3	0.26	0.32	0.22	0.47	0.275
ENSG00000279758		tec	0.129991145	-2.943514741	0.001175645	0.016168517	yes	down	0.33	0.33	1.03	1.05	0	0.31	0	0	0.685	0.0775
ENSG00000278996		novel transcript	0.59083784	-0.759165869	0.001178217	0.016196542	yes	down	0.57	1.61	2.09	0.49	0	2.31	0.45	0	1.19	0.69
ENSG00000162951	LRRTM1	leucine rich repeat transmembrane neuronal 1 [Source:HGNC Symbol;Acc:HGNC:19408]	2.180582456	1.124713545	0.001181604	0.016235752	yes	up	0.43	0.2	0.28	0.33	0.8	0.74	0.76	0.48	0.31	0.695
ENSG00000221886	ZBED8	zinc finger BED-type containing 8 [Source:HGNC Symbol;Acc:HGNC:30804]	1.501997354	0.586882271	0.001186766	0.016295596	yes	up	1.06	1.2	1.29	1.04	1.83	1.78	1.66	1.47	1.1475	1.685
ENSG00000251643		COP9 constitutive photomorphogenic homolog subunit 3 (Arabidopsis) (COPS3) pseudogene	1.534513926	0.617781739	0.001229948	0.016835193	yes	up	1.02	2.3	0.68	1.84	1.5	2.65	1.93	1.82	1.46	1.975
ENSG00000145476	CYP4V2	cytochrome P450 family 4 subfamily V member 2 [Source:HGNC Symbol;Acc:HGNC:23198]	1.608702424	0.685897483	0.001242046	0.016989288	yes	up	0.45	0.53	0.4	0.43	0.94	0.49	0.61	0.61	0.4525	0.6625
ENSG00000259974	LINC00261	long intergenic non-protein coding RNA 261 [Source:HGNC Symbol;Acc:HGNC:16189]	5.440728122	2.443799738	0.001261417	0.017223186	yes	up	0.01	0.01	0.01	0.02	0.07	0.1	0.09	0.5	0.0125	0.19
ENSG00000279412		novel transcript	2.459504801	1.298367871	0.001270047	0.017313731	yes	up	0.23	0.12	0.1	0.21	0.22	0.38	0.45	0.56	0.165	0.4025
ENSG00000258311		novel protein	1.51679296	0.601024174	0.001271496	0.017329596	yes	up	0.86	0.91	0.98	0.78	1.8	1.52	2.9	0.24	0.8825	1.615
ENSG00000163218	PGLYRP4	peptidoglycan recognition protein 4 [Source:HGNC Symbol;Acc:HGNC:30015]	12.08404521	3.595031582	0.001281417	0.017449138	yes	up	0	0.03	0	0	0.12	0.13	0.1	0.2	0.0075	0.1375
ENSG00000288634		novel protein	24.90479422	4.638351585	0.001289748	0.017546815	yes	up	0	0	0	0	52.01	40.06	81.52	18.57	0	48.04
ENSG00000272468		novel transcript	0.385981633	-1.373395896	0.001290206	0.017549119	yes	down	0	3.67	5.81	3.08	0	0	4.68	0	3.14	1.17
ENSG00000224407		novel transcript	0.505701836	-0.98364108	0.00129933	0.017669261	yes	down	3.47	2.83	2.72	0	1.15	0	0.61	2.71	2.255	1.1175
ENSG00000279423		TEC	1.546307118	0.628826887	0.001337787	0.018131261	yes	up	6.43	7.43	6.45	4.13	11.38	4.93	10.82	9.7	6.11	9.2075
ENSG00000147138	GPR174	G protein-coupled receptor 174 [Source:HGNC Symbol;Acc:HGNC:30245]	0.536154884	-0.89927827	0.001342503	0.01818299	yes	down	0.4	0.44	0.43	0.26	0.21	0.19	0.19	0.21	0.3825	0.2
ENSG00000269399		novel transcript	0.610779056	-0.711277503	0.001362543	0.018433832	yes	down	1.49	1.42	2.11	1.49	0.91	0.91	1.11	0.99	1.6275	0.98
ENSG00000015568	RGPD5	RANBP2 like and GRIP domain containing 5 [Source:HGNC Symbol;Acc:HGNC:32418]	0.642897497	-0.637339362	0.001363003	0.018435947	yes	down	2.14	0.76	0.3	5.18	0.75	1.07	1.57	0.73	2.095	1.03
ENSG00000105289	TJP3	tight junction protein 3 [Source:HGNC Symbol;Acc:HGNC:11829]	0.452647179	-1.143541131	0.001396481	0.018846751	yes	down	1.03	0.65	1.28	1.86	0.21	0.86	1.54	0.36	1.205	0.7425
ENSG00000237232	ZNF295-AS1	ZNF295 antisense RNA 1 [Source:HGNC Symbol;Acc:HGNC:23130]	0.26295162	-1.927130712	0.001400195	0.018892672	yes	down	0.66	0.5	0.38	0.9	0.26	0.09	0.21	0.03	0.61	0.1475
ENSG00000185203	WASIR1	WASH and IL9R antisense RNA 1 [Source:HGNC Symbol;Acc:HGNC:38513]	0.5622043	-0.830833607	0.00140387	0.018929621	yes	down	2.11	1.54	2.97	2.83	1.94	1.75	0.4	1.09	2.3625	1.295
ENSG00000107742	SPOCK2	SPARC (osteonectin), cwcv and kazal like domains proteoglycan 2 [Source:HGNC Symbol;Acc:HGNC:13564]	2.925570149	1.548717811	0.001405047	0.018937072	yes	up	0.07	0.12	0.06	0.17	0.25	0.17	0.57	0.14	0.105	0.2825
ENSG00000267439		novel transcript	0.274576363	-1.864720658	0.001425546	0.019183523	yes	down	0.27	0.53	0.41	0.77	0.11	0.07	0.1	0.16	0.495	0.11
ENSG00000279342		novel transcript, sense intronic to MSANTD2	0.613777894	-0.704211408	0.001430243	0.0192382	yes	down	0.76	0.96	1.86	0.8	0.99	0.6	0.48	0.96	1.095	0.7575
ENSG00000168961	LGALS9	galectin 9 [Source:HGNC Symbol;Acc:HGNC:6570]	0.662041754	-0.595005886	0.001454624	0.019535819	yes	down	3.38	3.1	3.53	3.23	2.39	2.97	2.49	1.91	3.31	2.44
ENSG00000107807	TLX1	T cell leukemia homeobox 1 [Source:HGNC Symbol;Acc:HGNC:5056]	0.120469463	-3.053260596	0.001491921	0.019996884	yes	down	0.1	0.27	0.14	0.15	0	0.07	0	0	0.165	0.0175
ENSG00000135722	FBXL8	F-box and leucine rich repeat protein 8 [Source:HGNC Symbol;Acc:HGNC:17875]	0.594694868	-0.749778469	0.001496805	0.020049057	yes	down	3.19	3.75	3.16	2.79	4.36	1.39	2.38	1.15	3.2225	2.32
ENSG00000177283	FZD8	frizzled class receptor 8 [Source:HGNC Symbol;Acc:HGNC:4046]	0.579035327	-0.788276726	0.00149735	0.020051924	yes	down	0.61	0.59	0.74	0.6	0.28	0.37	0.5	0.29	0.635	0.36
ENSG00000228793		novel transcript	0.171127883	-2.546853249	0.001504926	0.020144497	yes	down	0.09	0.28	0.21	0.36	0.07	0.04	0	0.05	0.235	0.04
ENSG00000068985	PAGE1	PAGE family member 1 [Source:HGNC Symbol;Acc:HGNC:4107]	0.549688951	-0.863312614	0.001507341	0.020159028	yes	down	6.33	4.07	4.94	5.51	4.02	2.11	3.35	1.66	5.2125	2.785
ENSG00000234664	HMGN2P5	high mobility group nucleosomal binding domain 2 pseudogene 5 [Source:HGNC Symbol;Acc:HGNC:33568]	24.18715648	4.596169266	0.001543955	0.020594215	yes	up	0	0	0	0	0	0	0	14.37	0	3.5925
ENSG00000273523		novel transcript, antisense to NEK3 & NEK5	0.121393279	-3.042239541	0.001553888	0.02071304	yes	down	0.02	0.1	0.07	0.2	0.04	0	0	0	0.0975	0.01
ENSG00000235370	DNM1P51	dynamin 1 pseudogene 51 [Source:HGNC Symbol;Acc:HGNC:48500]	1.530281187	0.613796771	0.001565242	0.020836913	yes	up	0.37	0.39	0.35	0.27	1.3	1.01	0.44	0.36	0.345	0.7775
ENSG00000143375	CGN	cingulin [Source:HGNC Symbol;Acc:HGNC:17429]	0.434231095	-1.203465056	0.001569249	0.020885676	yes	down	0.3	0.55	0.89	0.53	0.14	0.1	0.12	0.08	0.5675	0.11
ENSG00000203546		novel protein	0.183087273	-2.449396586	0.001571767	0.020914609	yes	down	1.58	0.15	0.66	1.09	0.15	0.22	0.17	0	0.87	0.135
ENSG00000153832	FBXO36	F-box protein 36 [Source:HGNC Symbol;Acc:HGNC:27020]	0.451307357	-1.147817797	0.001582267	0.021026644	yes	down	0.61	0.46	0.68	0.47	0.27	0.22	0.36	0.05	0.555	0.225
ENSG00000151320	AKAP6	A-kinase anchoring protein 6 [Source:HGNC Symbol;Acc:HGNC:376]	1.983948773	0.988374774	0.001587186	0.021082779	yes	up	0.15	0.35	0.19	0.15	0.3	0.14	0.28	0.31	0.21	0.2575
ENSG00000229648	RPSAP22	ribosomal protein SA pseudogene 22 [Source:HGNC Symbol;Acc:HGNC:36435]	0.279976114	-1.836624344	0.001588128	0.021090673	yes	down	1.02	0.63	1.32	1.15	0.19	0.4	0.1	0.41	1.03	0.275
ENSG00000142675	CNKSR1	connector enhancer of kinase suppressor of Ras 1 [Source:HGNC Symbol;Acc:HGNC:19700]	1.975676591	0.982346804	0.001595232	0.021175748	yes	up	0.36	0.33	0.48	0.55	0.61	1.86	2.07	1.98	0.43	1.63
ENSG00000101977	MCF2	MCF.2 cell line derived transforming sequence [Source:HGNC Symbol;Acc:HGNC:6940]	1.500923642	0.585850583	0.001601876	0.021249996	yes	up	1.2	1.38	1.09	1.29	2.02	1.11	2.22	1.57	1.24	1.73
ENSG00000250714		novel transcript	0.0411716	-4.602206686	0.001605824	0.021293047	yes	down	0.38	0	0.19	0.22	0	0	0	0	0.1975	0
ENSG00000183690	EFHC2	EF-hand domain containing 2 [Source:HGNC Symbol;Acc:HGNC:26233]	0.653922987	-0.612807357	0.001612329	0.021369965	yes	down	3.03	2.43	3.37	2.87	2.04	1.64	1.78	1.99	2.925	1.8625
ENSG00000171817	ZNF540	zinc finger protein 540 [Source:HGNC Symbol;Acc:HGNC:25331]	0.591293233	-0.758054329	0.00164385	0.021744987	yes	down	0.75	1.83	1.4	1.14	0.58	0.38	0.63	1.3	1.28	0.7225
ENSG00000185198	PRSS57	serine protease 57 [Source:HGNC Symbol;Acc:HGNC:31397]	2.778887572	1.474507467	0.001657422	0.021900637	yes	up	0.29	0.71	0.33	0.22	1.28	1.31	0.6	0.97	0.3875	1.04
ENSG00000187994	RINL	Ras and Rab interactor like [Source:HGNC Symbol;Acc:HGNC:24795]	0.629853217	-0.666912437	0.001658181	0.021905904	yes	down	1.37	1.81	2.01	1.38	0.46	1.13	1.17	1.99	1.6425	1.1875
ENSG00000110934	BIN2	bridging integrator 2 [Source:HGNC Symbol;Acc:HGNC:1053]	0.041607685	-4.587006152	0.001662361	0.021956334	yes	down	0.07	0.04	0.14	0.13	0	0	0	0	0.095	0
ENSG00000255471		novel transcript	0.586961087	-0.768663232	0.001663466	0.021966152	yes	down	2.14	2.11	2.14	2.64	1.29	1.53	1.48	1.01	2.2575	1.3275
ENSG00000270419	CAHM	colon adenocarcinoma hypermethylated [Source:HGNC Symbol;Acc:HGNC:42860]	0.380607203	-1.39362523	0.001702272	0.02242976	yes	down	1.51	1.87	1.47	0.98	0.36	0.84	0.28	0.67	1.4575	0.5375
ENSG00000104892	KLC3	kinesin light chain 3 [Source:HGNC Symbol;Acc:HGNC:20717]	0.339469865	-1.558644585	0.001704854	0.022458904	yes	down	0.52	0.29	0.65	0.63	0.12	0.33	0.12	0.12	0.5225	0.1725
ENSG00000249013	FTH1P21	ferritin heavy chain 1 pseudogene 21 [Source:HGNC Symbol;Acc:HGNC:3997]	0.461973824	-1.114116986	0.001739576	0.022861707	yes	down	2.05	4.53	2.98	4.7	1.25	1.81	2.07	1.32	3.565	1.6125
ENSG00000159753	CARMIL2	capping protein regulator and myosin 1 linker 2 [Source:HGNC Symbol;Acc:HGNC:27089]	0.614856153	-0.701679166	0.001741082	0.022861681	yes	down	0.95	1.6	1.54	0.7	0.77	0.76	0.79	1.38	1.1975	0.925
ENSG00000204472	AIF1	allograft inflammatory factor 1 [Source:HGNC Symbol;Acc:HGNC:352]	0.536781905	-0.897592055	0.001754285	0.023005176	yes	down	5.48	3.37	6.02	7.04	4.81	1.86	2.01	3.06	5.4775	2.935
ENSG00000138172	CALHM2	calcium homeostasis modulator family member 2 [Source:HGNC Symbol;Acc:HGNC:23493]	1.964164997	0.973916127	0.001763274	0.023103077	yes	up	0.66	1.09	1	1.15	1.34	2.14	1.42	1.87	0.975	1.6925
ENSG00000203722	RAET1G	retinoic acid early transcript 1G [Source:HGNC Symbol;Acc:HGNC:16795]	23.33963175	4.544709893	0.001773146	0.023222388	yes	up	0	0	0	0	0.45	0.07	0.21	0.07	0	0.2
ENSG00000250049		novel transcript	1.804362047	0.851488846	0.001776797	0.023260172	yes	up	0.75	0.49	0.53	0.5	1.18	1.09	0.99	1.09	0.5675	1.0875
ENSG00000255491		novel transcript	0.577959824	-0.790958885	0.001780354	0.023296673	yes	down	1.12	0.64	0.91	0.97	0.52	0.4	0.59	0.44	0.91	0.4875
ENSG00000241073		novel transcript	23.40346707	4.548650366	0.001782112	0.023304605	yes	up	0	0	0	0	0	5.3	0	0	0	1.325
ENSG00000263335		novel transcript, antisense to MYH11	23.3645747	4.546250871	0.001789893	0.023396266	yes	up	0	0	0	0	0	0.36	0.62	0.13	0	0.2775
ENSG00000225205		novel transcript	0.230468664	-2.117357491	0.001793998	0.023439823	yes	down	0.59	0.29	0.37	0.59	0.15	0.05	0.08	0.11	0.46	0.0975
ENSG00000268357	VN1R81P	vomeronasal 1 receptor 81 pseudogene [Source:HGNC Symbol;Acc:HGNC:37401]	0.268154816	-1.898861933	0.001799967	0.023507686	yes	down	1.26	5.54	6.99	5.12	1.2	0.82	2.34	0.43	4.7275	1.1975
ENSG00000254777		novel transcript	0.214001895	-2.224304522	0.001807351	0.023578739	yes	down	6.96	12.82	5.72	15.02	3.95	1.53	1.29	1.28	10.13	2.0125
ENSG00000171105	INSR	insulin receptor [Source:HGNC Symbol;Acc:HGNC:6091]	1.798758955	0.847001869	0.001817491	0.023690641	yes	up	0.57	0.06	0.59	0.39	0.24	0.25	0.64	0.8	0.4025	0.4825
ENSG00000132259	CNGA4	cyclic nucleotide gated channel subunit alpha 4 [Source:HGNC Symbol;Acc:HGNC:2152]	0.544386602	-0.877296535	0.001827359	0.023798816	yes	down	38.93	44.42	47.34	52.93	28.8	19.86	22.19	25.5	45.905	24.0875
ENSG00000248498	ASNSP1	asparagine synthetase pseudogene 1 [Source:HGNC Symbol;Acc:HGNC:754]	0.456393278	-1.131650551	0.001844297	0.023998811	yes	down	1.32	0.83	1.3	0.8	0.22	0.31	0.8	0.45	1.0625	0.445
ENSG00000225760	LINC00431	long intergenic non-protein coding RNA 431 [Source:HGNC Symbol;Acc:HGNC:42766]	0.599185444	-0.738925519	0.001855069	0.024118289	yes	down	2.36	3.3	4.32	3.17	1.74	1.86	1.53	1.41	3.2875	1.635
ENSG00000088826	SMOX	spermine oxidase [Source:HGNC Symbol;Acc:HGNC:15862]	0.629739256	-0.667173492	0.001900349	0.024643602	yes	down	1.26	2.01	1.73	1.76	1.51	1.04	0.77	1.96	1.69	1.32
ENSG00000260349		novel transcript, antisense to C16orf72	22.93396194	4.519413703	0.001906375	0.024716458	yes	up	0	0	0	0	1.33	0	0	0	0	0.3325
ENSG00000272195		novel transcript, antisense to EFCAB2	0.336655636	-1.570654476	0.001909769	0.02473932	yes	down	0.09	0.87	0.48	0.6	0.05	0.35	0.17	0.08	0.51	0.1625
ENSG00000131634	TMEM204	transmembrane protein 204 [Source:HGNC Symbol;Acc:HGNC:14158]	6.705839135	2.745417875	0.001914897	0.02478987	yes	up	0.04	0.04	0.04	0	0.2	0.12	0.29	0.3	0.03	0.2275
ENSG00000166689	PLEKHA7	pleckstrin homology domain containing A7 [Source:HGNC Symbol;Acc:HGNC:27049]	0.583178376	-0.777990868	0.001928908	0.024949954	yes	down	0.58	1.32	0.58	0.77	0.38	0.71	0.47	0.73	0.8125	0.5725
ENSG00000251602		novel transcript, antisense to MTA1	1.901129435	0.926856759	0.001933454	0.024998093	yes	up	0.33	1.2	0.55	1.06	1.52	1.83	1.73	1.64	0.785	1.68
ENSG00000251066		PDGFA associated protein 1 pseudogene	0.663719528	-0.591354374	0.001967563	0.025390391	yes	down	1.58	1.16	2.23	2.54	1.87	1.26	1.26	1.37	1.8775	1.44
ENSG00000259985		novel transcript, antisense to B4GALT6	2.163385282	1.113290621	0.001989242	0.025642872	yes	up	1.12	0.34	0.63	0.44	1.14	1.57	1.03	1.68	0.6325	1.355
ENSG00000244556	ODCP	ornithine decarboxylase pseudogene [Source:HGNC Symbol;Acc:HGNC:8110]	0.437374253	-1.193059801	0.002004154	0.025813163	yes	down	0.91	0.5	0.98	0.82	0.25	0.47	0.39	0.27	0.8025	0.345
ENSG00000108821	COL1A1	collagen type I alpha 1 chain [Source:HGNC Symbol;Acc:HGNC:2197]	0.473527597	-1.078479588	0.002048289	0.026309002	yes	down	0.58	0.66	0.47	0.67	0.36	0.24	0.33	0.32	0.595	0.3125
ENSG00000107859	PITX3	paired like homeodomain 3 [Source:HGNC Symbol;Acc:HGNC:9006]	0.090227006	-3.470296873	0.002049035	0.026307442	yes	down	0.19	0.16	0.36	0.18	0	0	0.06	0	0.2225	0.015
ENSG00000107317	PTGDS	prostaglandin D2 synthase [Source:HGNC Symbol;Acc:HGNC:9592]	0.39263378	-1.348743794	0.002049733	0.026310836	yes	down	2.29	1.87	2.73	0.93	0.35	0.93	1.18	0.49	1.955	0.7375
ENSG00000183246	RIMBP3C	RIMS binding protein 3C [Source:HGNC Symbol;Acc:HGNC:33892]	0.286401844	-1.803887315	0.002052353	0.02633332	yes	down	0.05	0.24	0.06	0.09	0.05	0	0	0.08	0.11	0.0325
ENSG00000221874	ZNF816-ZNF321P	ZNF816-ZNF321P readthrough [Source:HGNC Symbol;Acc:HGNC:38879]	0.63110817	-0.664040794	0.00206095	0.026438034	yes	down	1.02	3.47	1.68	2.26	1.56	0.87	1.81	0.7	2.1075	1.235
ENSG00000142539		novel protein	10.11811394	3.338868486	0.00206287	0.026457065	yes	up	0	0	0.07	0	0.97	0	0	0	0.0175	0.2425
ENSG00000272142	LYRM4-AS1	LYRM4 antisense RNA 1 [Source:NCBI gene (formerly Entrezgene);Acc:100129461]	1.779519762	0.831487954	0.002082289	0.026649786	yes	up	0.95	0.58	1.1	1.09	1.41	1.34	1.63	1.76	0.93	1.535
ENSG00000250753		coiled-coil domain containing 144A (CCDC144A) pseudogene	1.656211828	0.727887204	0.002118843	0.027060523	yes	up	2.29	7.84	5.05	2.32	6.21	4.43	6.74	7.32	4.375	6.175
ENSG00000174844	DNAH12	dynein axonemal heavy chain 12 [Source:HGNC Symbol;Acc:HGNC:2943]	0.043309388	-4.529176394	0.002150352	0.027416756	yes	down	0.01	0.08	0	0.04	0	0	0	0	0.0325	0
ENSG00000227896		novel transcript	0.65344116	-0.613870763	0.002167093	0.027601206	yes	down	1.31	1.7	1.21	1.05	0.8	0.95	0.8	0.81	1.3175	0.84
ENSG00000136052	SLC41A2	solute carrier family 41 member 2 [Source:HGNC Symbol;Acc:HGNC:31045]	2.090678263	1.063971061	0.002170167	0.027628755	yes	up	0.05	0.16	0.41	0.72	0.59	0.65	0.84	0.24	0.335	0.58
ENSG00000175793	SFN	stratifin [Source:HGNC Symbol;Acc:HGNC:10773]	0.521711616	-0.93867554	0.002214497	0.028151774	yes	down	1.26	2.03	1.64	1.51	0.66	0.68	0.84	1.11	1.61	0.8225
ENSG00000253981	ALG1L13P	ALG1 like 13, pseudogene [Source:HGNC Symbol;Acc:HGNC:44382]	0.584417317	-0.774929168	0.002221816	0.028227065	yes	down	4.51	6.25	6.05	4.88	2.81	1.31	4.2	4.53	5.4225	3.2125
ENSG00000123094	RASSF8	Ras association domain family member 8 [Source:HGNC Symbol;Acc:HGNC:13232]	2.164445134	1.113997231	0.002247222	0.028519976	yes	up	0.32	0.09	0.08	0.79	0.59	0.41	0.58	0.29	0.32	0.4675
ENSG00000260855		novel transcript	1.89179361	0.919754703	0.002253446	0.028587009	yes	up	0.26	0.27	0.31	0.3	0.59	0.59	0.48	0.48	0.285	0.535
ENSG00000185385	OR7A17	olfactory receptor family 7 subfamily A member 17 [Source:HGNC Symbol;Acc:HGNC:8363]	0.044042667	-4.504954364	0.002257697	0.028634939	yes	down	0.05	0.06	0.05	0.03	0	0	0	0	0.0475	0
ENSG00000229292	RFPL4AL1	ret finger protein like 4A like 1 [Source:HGNC Symbol;Acc:HGNC:45147]	0.044251782	-4.498120651	0.00227667	0.028851454	yes	down	0.42	0	0.27	0	0	0	0	0	0.1725	0
ENSG00000167600	CYP2S1	cytochrome P450 family 2 subfamily S member 1 [Source:HGNC Symbol;Acc:HGNC:15654]	0.487364188	-1.03692785	0.002279624	0.028882861	yes	down	0.41	0.65	1.12	0.8	0.83	0.18	0.56	0.36	0.745	0.4825
ENSG00000233338	TLR8-AS1	TLR8 antisense RNA 1 [Source:HGNC Symbol;Acc:HGNC:40720]	0.044172968	-4.500692412	0.002296104	0.029079508	yes	down	0.11	0.17	0.05	0.26	0	0	0	0	0.1475	0
ENSG00000180535	BHLHA15	basic helix-loop-helix family member a15 [Source:HGNC Symbol;Acc:HGNC:22265]	0.649562634	-0.622459452	0.002299463	0.029097753	yes	down	1.13	1.4	0.93	1.23	0.68	0.75	0.92	0.66	1.1725	0.7525
ENSG00000245648	KLRK1-AS1	KLRK1 antisense RNA 1 [Source:HGNC Symbol;Acc:HGNC:54868]	0.613281528	-0.705378596	0.002334505	0.029504259	yes	down	3.44	2.15	1.63	2.62	1.76	1.44	1.78	1.36	2.46	1.585
ENSG00000258588	TRIM6-TRIM34	TRIM6-TRIM34 readthrough [Source:HGNC Symbol;Acc:HGNC:33440]	22.10752629	4.466465699	0.002361899	0.029813204	yes	up	0	0	0	0	0	0	0.07	0.13	0	0.05
ENSG00000260729		novel protein	21.88686862	4.451993656	0.002404473	0.030268716	yes	up	0	0	0	0	0.08	0	0.07	0	0	0.0375
ENSG00000196338	NLGN3	neuroligin 3 [Source:HGNC Symbol;Acc:HGNC:14289]	2.102764357	1.072287186	0.002444169	0.030704716	yes	up	0.2	0.21	0.21	0.18	0.51	0.27	0.5	0.27	0.2	0.3875
ENSG00000213199	ASIC3	acid sensing ion channel subunit 3 [Source:HGNC Symbol;Acc:HGNC:101]	1.99410505	0.995741413	0.002492718	0.031249892	yes	up	1.01	0.83	0.66	0.64	1.39	1.49	2.15	2.56	0.785	1.8975
ENSG00000246851		novel transcript	1.970513526	0.978571653	0.002499797	0.031325693	yes	up	0.27	0.27	0.35	0.18	0.58	0.49	0.46	0.57	0.2675	0.525
ENSG00000223764	LINC02593	long intergenic non-protein coding RNA 2593 [Source:HGNC Symbol;Acc:HGNC:53933]	2.35270005	1.2343174	0.002503636	0.031367321	yes	up	0.23	0.05	0.11	0.15	0.49	0.32	0.26	0.29	0.135	0.34
ENSG00000135604	STX11	syntaxin 11 [Source:HGNC Symbol;Acc:HGNC:11429]	0.538960656	-0.891748133	0.00251122	0.031442859	yes	down	0.34	0.32	0.37	0.36	0.15	0.2	0.26	0.12	0.3475	0.1825
ENSG00000154760	SLFN13	schlafen family member 13 [Source:HGNC Symbol;Acc:HGNC:26481]	4.020580502	2.007403817	0.002602813	0.032502482	yes	up	0	0.02	0.06	0.29	1.19	0.15	0.12	0.05	0.0925	0.3775
ENSG00000274553	CICP15	capicua transcriptional repressor pseudogene 15 [Source:HGNC Symbol;Acc:HGNC:38549]	1.923420873	0.94367448	0.00268929	0.033492727	yes	up	0.19	0.49	0.2	0.44	0.34	0.81	0.46	0.88	0.33	0.6225
ENSG00000247228		novel transcript, antisense to PDPR & CLEC18C	0.04546577	-4.459075417	0.002695879	0.033561009	yes	down	0	0.33	0.08	0	0	0	0	0	0.1025	0
ENSG00000147166	ITGB1BP2	integrin subunit beta 1 binding protein 2 [Source:HGNC Symbol;Acc:HGNC:6154]	2.471891526	1.305615435	0.002701114	0.033619282	yes	up	0.24	0.51	0.42	0.64	0.78	0.98	1.95	1.37	0.4525	1.27
ENSG00000241106	HLA-DOB	major histocompatibility complex, class II, DO beta [Source:HGNC Symbol;Acc:HGNC:4937]	0.634039423	-0.657355549	0.00274444	0.034074647	yes	down	2.9	3.19	2.91	2.06	1.47	1.7	1.69	2.44	2.765	1.825
ENSG00000015285	WAS	WASP actin nucleation promoting factor [Source:HGNC Symbol;Acc:HGNC:12731]	0.495619181	-1.012696074	0.002748438	0.034110326	yes	down	0.75	0.88	1.06	0.83	0.91	0.52	1	0.51	0.88	0.735
ENSG00000254732		novel protein, C11orf31-CTNND1 readthrough	5.0559143	2.337972009	0.002755506	0.034184053	yes	up	0	0.23	0	0.1	0	0	0.26	0.47	0.0825	0.1825
ENSG00000235272	RAMACL	RNA guanine-7 methyltransferase activating subunit like (pseudogene) [Source:HGNC Symbol;Acc:HGNC:21234]	0.424264471	-1.236964225	0.002760979	0.034223949	yes	down	1.98	1.21	0.76	0.8	0.22	0.36	0.7	0.54	1.1875	0.455
ENSG00000047365	ARAP2	ArfGAP with RhoGAP domain, ankyrin repeat and PH domain 2 [Source:HGNC Symbol;Acc:HGNC:16924]	1.532025322	0.615440143	0.002786796	0.034508712	yes	up	0.32	0.35	0.29	0.3	0.5	1.31	0.59	0.51	0.315	0.7275
ENSG00000249459	ZNF286B	zinc finger protein 286B (pseudogene) [Source:HGNC Symbol;Acc:HGNC:33241]	1.67551773	0.744606953	0.002831879	0.034995544	yes	up	0.39	0.28	0.3	0.3	0.39	0.56	0.42	0.53	0.3175	0.475
ENSG00000256349		novel protein	3.025306241	1.597081189	0.002850523	0.035175774	yes	up	0.11	0	0	0.16	0.19	0.25	0.24	0.14	0.0675	0.205
ENSG00000271853		novel transcript	1.838358701	0.878418293	0.002906081	0.035781311	yes	up	1.82	1.01	2.04	2.04	2.99	2.25	3.64	2.59	1.7275	2.8675
ENSG00000114841	DNAH1	dynein axonemal heavy chain 1 [Source:HGNC Symbol;Acc:HGNC:2940]	1.735482426	0.795336756	0.002906653	0.035781089	yes	up	0.15	0.21	0.17	0.08	0.24	0.4	0.79	0.33	0.1525	0.44
ENSG00000285812		novel transcript, antisense to C1orf159	1.991168696	0.993615455	0.002931128	0.036031191	yes	up	0.72	1.36	0.75	1.84	1.75	1.52	2.11	3.73	1.1675	2.2775
ENSG00000061656	SPAG4	sperm associated antigen 4 [Source:HGNC Symbol;Acc:HGNC:11214]	0.66014255	-0.599150504	0.002945658	0.03620247	yes	down	4.62	6.57	3.78	4.21	3.86	4.08	2.79	2.06	4.795	3.1975
ENSG00000064489	BORCS8-MEF2B	BORCS8-MEF2B readthrough [Source:HGNC Symbol;Acc:HGNC:39979]	1.678593023	0.74725249	0.002945804	0.036189607	yes	up	3.7	2.07	2.07	0.16	4.64	1.17	2.65	1.92	2	2.595
ENSG00000197134	ZNF257	zinc finger protein 257 [Source:HGNC Symbol;Acc:HGNC:13498]	0.639667543	-0.644605814	0.002969977	0.036464415	yes	down	1.59	0.97	1.03	1.46	0.89	0.92	0.78	0.58	1.2625	0.7925
ENSG00000184492	FOXD4L1	forkhead box D4 like 1 [Source:HGNC Symbol;Acc:HGNC:18521]	1.900150731	0.926113866	0.002986014	0.036624252	yes	up	0.37	0.54	0.3	0.31	0.83	0.48	0.82	0.72	0.38	0.7125
ENSG00000270362	HMGN3-AS1	HMGN3 antisense RNA 1 [Source:HGNC Symbol;Acc:HGNC:48984]	1.948694574	0.962507989	0.003011247	0.036903899	yes	up	0.16	0.26	0.43	0.27	0.43	0.35	0.68	0.71	0.28	0.5425
ENSG00000126860	EVI2A	ecotropic viral integration site 2A [Source:HGNC Symbol;Acc:HGNC:3499]	0.379817424	-1.396622006	0.003034488	0.037166194	yes	down	0.26	0.61	0.64	0.6	0.17	0.18	0.07	0.16	0.5275	0.145
ENSG00000187479	C11orf96	chromosome 11 open reading frame 96 [Source:HGNC Symbol;Acc:HGNC:38675]	0.538861952	-0.892012369	0.003058644	0.03743938	yes	down	1.7	2.28	1.54	1.55	1.35	1.5	0.54	0.31	1.7675	0.925
ENSG00000253898	LINC01419	long intergenic non-protein coding RNA 1419 [Source:HGNC Symbol;Acc:HGNC:50712]	0.528487706	-0.920058184	0.003075674	0.037602312	yes	down	1.29	1.31	1.32	1.21	0.64	0.61	0.76	0.64	1.2825	0.6625
ENSG00000244198	ARHGEF35-AS1	ARHGEF35 antisense RNA 1 [Source:HGNC Symbol;Acc:HGNC:41292]	0.607777313	-0.718385271	0.003079774	0.037637275	yes	down	0.75	0.83	0.76	0.8	0.4	0.34	0.5	0.63	0.785	0.4675
ENSG00000105641	SLC5A5	solute carrier family 5 member 5 [Source:HGNC Symbol;Acc:HGNC:11040]	0.578980189	-0.78841411	0.003104509	0.037886128	yes	down	0.54	0.65	0.67	0.66	0.47	0.32	0.33	0.31	0.63	0.3575
ENSG00000124466	LYPD3	LY6/PLAUR domain containing 3 [Source:HGNC Symbol;Acc:HGNC:24880]	0.244994164	-2.029180713	0.003111392	0.037954849	yes	down	0.22	0.25	0.62	0.5	0.1	0.04	0	0.18	0.3975	0.08
ENSG00000287670		novel transcript	0.596273297	-0.745954366	0.003152776	0.038374805	yes	down	4.61	3.13	3.53	3.02	2.89	1.86	1.33	2.28	3.5725	2.09
ENSG00000076356	PLXNA2	plexin A2 [Source:HGNC Symbol;Acc:HGNC:9100]	0.544765667	-0.876292311	0.003211137	0.038999081	yes	down	0.15	0.2	0.19	1.18	0.09	0.12	0.08	0.1	0.43	0.0975
ENSG00000188693	CYP51A1-AS1	CYP51A1 antisense RNA 1 [Source:HGNC Symbol;Acc:HGNC:50694]	10.66308194	3.414552574	0.00322041	0.039103873	yes	up	0	0.02	0	0	0.09	0.18	0.02	0.05	0.005	0.085
ENSG00000198838	RYR3	ryanodine receptor 3 [Source:HGNC Symbol;Acc:HGNC:10485]	5.480887093	2.454409415	0.003228217	0.039182983	yes	up	0.06	0	0.03	0	0.13	0.06	0.19	0.2	0.0225	0.145
ENSG00000279561		TEC	1.841675895	0.881019193	0.003242547	0.039341178	yes	up	0.24	0.26	0.22	0.28	0.36	0.45	0.39	0.61	0.25	0.4525
ENSG00000286212		novel transcript	0.0477486	-4.38839776	0.003244699	0.039359411	yes	down	0.18	0.14	0.21	0.06	0	0	0	0	0.1475	0
ENSG00000253320	MAILR	macrophage interferon regulatory lncRNA [Source:HGNC Symbol;Acc:HGNC:51558]	0.274568819	-1.864760298	0.003255884	0.039471412	yes	down	0.74	2.07	2.27	1.22	0.79	0.02	0.01	0.02	1.575	0.21
ENSG00000107954	NEURL1	neuralized E3 ubiquitin protein ligase 1 [Source:HGNC Symbol;Acc:HGNC:7761]	1.910240554	0.933754326	0.003257162	0.039479017	yes	up	0.49	0.72	0.82	0.72	1.76	1.33	1.56	1.32	0.6875	1.4925
ENSG00000251247	ZNF345	zinc finger protein 345 [Source:HGNC Symbol;Acc:HGNC:16367]	0.651211071	-0.618802868	0.003295232	0.03990855	yes	down	1.49	1.46	1.16	1.84	1.45	0.87	0.9	0.7	1.4875	0.98
ENSG00000232070	TMEM253	transmembrane protein 253 [Source:HGNC Symbol;Acc:HGNC:32545]	0.1576847	-2.664885415	0.003307905	0.039998154	yes	down	0.23	0.78	0.16	0.22	0.17	0	0	0	0.3475	0.0425
ENSG00000261744	ZFPM1-AS1	ZFPM1 antisense RNA 1 [Source:HGNC Symbol;Acc:HGNC:55351]	7.558593804	2.918117861	0.003364245	0.040590401	yes	up	0	0.26	0	0	1.33	0.38	0.37	0.13	0.065	0.5525
ENSG00000172974	VDAC2P5	VDAC2 pseudogene 5 [Source:HGNC Symbol;Acc:HGNC:54753]	0.048393038	-4.369056664	0.003369677	0.040639776	yes	down	0	0.11	0.28	0.53	0	0	0	0	0.23	0
ENSG00000278071		novel transcript	0.544699762	-0.876466859	0.003401735	0.040961264	yes	down	3.14	3.39	3.52	3.49	1.22	2.66	1.58	1.76	3.385	1.805
ENSG00000249624		novel protein	0.666591028	-0.585126196	0.003411834	0.041074711	yes	down	0.91	1.15	2.17	1.6	1.75	1.64	0.13	1.31	1.4575	1.2075
ENSG00000188818	ZDHHC11	zinc finger DHHC-type containing 11 [Source:HGNC Symbol;Acc:HGNC:19158]	1.930195087	0.948746669	0.003418389	0.041137299	yes	up	0.23	0.74	1.51	1.43	1.13	1.65	1.98	2.92	0.9775	1.92
ENSG00000269910		novel transcript, antisense to KLC1	2.088018765	1.062134677	0.003429117	0.041225511	yes	up	3.21	0	1.84	3.21	6.64	4.24	2.45	3.77	2.065	4.275
ENSG00000263647	BPTFP1	bromodomain PHD finger transcription factor pseudogene 1 [Source:HGNC Symbol;Acc:HGNC:52869]	10.70302551	3.419946767	0.003431733	0.04124879	yes	up	0.25	0	0	0	0	0	2.19	1.49	0.0625	0.92
ENSG00000276101		novel transcript, antisense to SLC38A10	2.731766343	1.449834091	0.003434069	0.041260516	yes	up	0.31	2.71	0	0.27	1.71	2.96	0.35	3.55	0.8225	2.1425
ENSG00000227199	ST7-AS1	ST7 antisense RNA 1 [Source:HGNC Symbol;Acc:HGNC:16000]	0.248440516	-2.009027623	0.003434607	0.04125881	yes	down	0.09	0.98	0.57	0.35	0.53	0.19	0	0.05	0.4975	0.1925
ENSG00000133317	LGALS12	galectin 12 [Source:HGNC Symbol;Acc:HGNC:15788]	0.557193406	-0.843749909	0.003453536	0.041477992	yes	down	1.14	1.3	1.15	1.65	0.91	0.66	0.76	0.55	1.31	0.72
ENSG00000272772		novel protein	0.165255106	-2.597233246	0.003458846	0.04153354	yes	down	1.3	1.92	1.53	0.86	0.43	0	0.35	0	1.4025	0.195
ENSG00000261949	GFY	golgi associated olfactory signaling regulator [Source:HGNC Symbol;Acc:HGNC:44663]	0.451629192	-1.146789354	0.003461604	0.041558426	yes	down	0.68	1.06	0.49	0.5	0.4	0.22	0.18	0.38	0.6825	0.295
ENSG00000287496		novel transcript	2.387191953	1.255314577	0.003541187	0.042404775	yes	up	0.62	0.05	0.31	0.61	2.03	0.55	0.61	0.57	0.3975	0.94
ENSG00000267110		novel transcript	0.636342732	-0.652124089	0.003638141	0.04340299	yes	down	5.63	3.24	4.33	2.71	2.42	1.92	1.83	3.77	3.9775	2.485
ENSG00000180316	PNPLA1	patatin like phospholipase domain containing 1 [Source:HGNC Symbol;Acc:HGNC:21246]	5.348929799	2.419250269	0.003643151	0.043445665	yes	up	0	0.05	0	0.09	0.24	0.14	0.11	0.09	0.035	0.145
ENSG00000276259		novel transcript, antisense to CNOT1	0.298605668	-1.743686545	0.00364589	0.043469788	yes	down	0.99	0.81	0.85	1.04	0.19	0.29	0.56	0	0.9225	0.26
ENSG00000162687	KCNT2	potassium sodium-activated channel subfamily T member 2 [Source:HGNC Symbol;Acc:HGNC:18866]	0.510345119	-0.970454901	0.003683433	0.043848464	yes	down	0.18	0.35	0.32	0.28	0.22	0.09	0.15	0.17	0.2825	0.1575
ENSG00000275342	PRAG1	PEAK1 related, kinase-activating pseudokinase 1 [Source:HGNC Symbol;Acc:HGNC:25438]	0.444177857	-1.170790621	0.003700375	0.04402423	yes	down	0.23	0.33	0.16	0.21	0.04	0.12	0.11	0.14	0.2325	0.1025
ENSG00000279699		TEC	4.433719911	2.148517634	0.00370143	0.044028151	yes	up	0.08	0	0	0.15	0.12	0.44	0.12	0.42	0.0575	0.275
ENSG00000182308	DCAF4L1	DDB1 and CUL4 associated factor 4 like 1 [Source:HGNC Symbol;Acc:HGNC:27723]	1.55111566	0.633306266	0.003732402	0.044370455	yes	up	0.39	0.51	0.39	0.46	0.61	0.49	0.89	0.67	0.4375	0.665
ENSG00000260625		novel transcript, antisense to C16orf58	0.277263346	-1.850671187	0.003745539	0.044500471	yes	down	0.83	1.07	0.52	0.89	0	0.3	0.74	0.17	0.8275	0.3025
ENSG00000272677	HNRNPD-DT	HNRNPD divergent transcript [Source:HGNC Symbol;Acc:HGNC:55205]	0.400772549	-1.319144402	0.003772358	0.044801547	yes	down	2.05	2.24	3.5	1.87	1.39	1.2	0.33	0.85	2.415	0.9425
ENSG00000286817		novel transcript	0.057048392	-4.131669978	0.003780272	0.04487797	yes	down	0.07	0	0.53	0.04	0	0.01	0	0	0.16	0.0025
ENSG00000150281	CTF1	cardiotrophin 1 [Source:HGNC Symbol;Acc:HGNC:2499]	0.578860109	-0.788713354	0.003811216	0.045209931	yes	down	1.74	1.5	1.21	1.47	0.96	0.81	0.72	0.86	1.48	0.8375
ENSG00000173706	HEG1	heart development protein with EGF like domains 1 [Source:HGNC Symbol;Acc:HGNC:29227]	4.820044967	2.269046606	0.003813761	0.045231275	yes	up	0.04	0.02	0	0	0.08	0.11	0.05	0.1	0.015	0.085
ENSG00000235128		novel pseudogene	3.042036977	1.60503769	0.003817424	0.045265872	yes	up	0.56	0.46	0.1	0.42	0.85	1.22	1.62	0.9	0.385	1.1475
ENSG00000285547		novel protein	0.416354479	-1.264115749	0.003838913	0.045502894	yes	down	0.83	0.38	0.55	0.69	0	0.28	0.46	0.25	0.6125	0.2475
ENSG00000181577	C6orf223	chromosome 6 open reading frame 223 [Source:HGNC Symbol;Acc:HGNC:28692]	0.44595128	-1.165041991	0.003873128	0.045854686	yes	down	0.53	0.28	0.22	0.37	0.06	0.23	0.05	0.22	0.35	0.14
ENSG00000261135		novel transcript	0.551399743	-0.8588295	0.003952324	0.046637582	yes	down	2.12	1.24	2.39	2.46	1.36	1.26	0.81	1.01	2.0525	1.11
ENSG00000072818	ACAP1	ArfGAP with coiled-coil, ankyrin repeat and PH domains 1 [Source:HGNC Symbol;Acc:HGNC:16467]	0.553373636	-0.853674184	0.004041735	0.047535437	yes	down	0.73	1.5	0.83	2.99	0.66	0.43	1.17	2.02	1.5125	1.07
ENSG00000233750	CICP27	capicua transcriptional repressor pseudogene 27 [Source:HGNC Symbol;Acc:HGNC:48835]	1.99729382	0.998046582	0.004050749	0.047622994	yes	up	0.22	0.31	0.2	0	0.36	0.35	0.5	0.23	0.1825	0.36
ENSG00000157335	CLEC18C	C-type lectin domain family 18 member C [Source:HGNC Symbol;Acc:HGNC:28538]	1.541455242	0.624293	0.004078563	0.047875768	yes	up	1.32	0.88	0.54	0.63	0.94	0.81	0.78	1.8	0.8425	1.0825
ENSG00000267385		novel protein	0.34785606	-1.52343764	0.004096927	0.048063426	yes	down	0.48	0.52	0.44	0.3	0.16	0.08	0.34	0	0.435	0.145
ENSG00000130822	PNCK	pregnancy up-regulated nonubiquitous CaM kinase [Source:HGNC Symbol;Acc:HGNC:13415]	0.557891757	-0.841942859	0.00414182	0.048543152	yes	down	1.9	3.92	2.07	1.74	1.58	0.96	1.55	0.88	2.4075	1.2425
ENSG00000234409	CCDC188	coiled-coil domain containing 188 [Source:HGNC Symbol;Acc:HGNC:51899]	19.41921172	4.279412734	0.00416194	0.048713092	yes	up	0	0	0	0	0.09	0.16	0.19	0.21	0	0.1625
ENSG00000005379	TSPOAP1	TSPO associated protein 1 [Source:HGNC Symbol;Acc:HGNC:16831]	1.505087734	0.589847586	0.004179412	0.048908153	yes	up	0.71	0.71	0.8	0.91	1.88	0.86	0.78	1.61	0.7825	1.2825
ENSG00000287576		novel transcript	1.91539093	0.937638875	0.004183528	0.048937436	yes	up	0.18	0.21	0.18	0.52	0.75	0.33	0.37	0.58	0.2725	0.5075
ENSG00000141756	FKBP10	FKBP prolyl isomerase 10 [Source:HGNC Symbol;Acc:HGNC:18169]	0.511229525	-0.967956935	0.004215486	0.04927326	yes	down	1.97	0.73	0.81	0.48	0.56	0.49	0.83	0.67	0.9975	0.6375
ENSG00000186092	OR4F5	olfactory receptor family 4 subfamily F member 5 [Source:HGNC Symbol;Acc:HGNC:14825]	0.257671636	-1.956394356	0.004352901	0.05068414	yes	down	0.18	0.19	0.18	0.22	0.05	0.05	0	0.09	0.1925	0.0475
ENSG00000234965	SHISA8	shisa family member 8 [Source:HGNC Symbol;Acc:HGNC:18351]	0.099601491	-3.327688856	0.004374518	0.050926074	yes	down	0.08	0.28	0.37	0.04	0	0	0.04	0	0.1925	0.01
ENSG00000160282	FTCD	formimidoyltransferase cyclodeaminase [Source:HGNC Symbol;Acc:HGNC:3974]	2.28966082	1.1951339	0.004393204	0.051074993	yes	up	0.26	0.54	0.52	0.36	1.19	1.21	1.42	1.19	0.42	1.2525
ENSG00000203907	OOEP	oocyte expressed protein [Source:HGNC Symbol;Acc:HGNC:21382]	0.590288572	-0.760507683	0.004506994	0.052257702	yes	down	1.7	1.59	2.66	1.55	1.26	0.97	1.39	0.73	1.875	1.0875
ENSG00000261641		novel transcript, antisense to CLCN7	0.051014154	-4.29295862	0.004509163	0.052272859	yes	down	0.42	0.23	0	0	0	0	0	0	0.1625	0
ENSG00000287979		novel transcript	0.462190339	-1.113440992	0.004541063	0.052602455	yes	down	1.03	0.53	1.29	1.13	0.38	0.51	0.33	0.58	0.995	0.45
ENSG00000279930		TEC	4.325831666	2.112977526	0.004546199	0.052641838	yes	up	0	0.1	0.05	0.03	0.12	0.2	0.22	0.29	0.045	0.2075
ENSG00000004848	ARX	aristaless related homeobox [Source:HGNC Symbol;Acc:HGNC:18060]	0.604881744	-0.725274975	0.00455325	0.052713428	yes	down	0.62	1.31	0.69	0.82	0.59	0.63	0.42	0.37	0.86	0.5025
ENSG00000156042	CFAP70	cilia and flagella associated protein 70 [Source:HGNC Symbol;Acc:HGNC:30726]	2.260410821	1.176585001	0.004574808	0.052922612	yes	up	0.06	0.13	0.21	0.1	0.25	0.42	0.29	0.45	0.125	0.3525
ENSG00000275074	NUDT18	nudix hydrolase 18 [Source:HGNC Symbol;Acc:HGNC:26194]	0.653278616	-0.614229678	0.004580225	0.052975172	yes	down	2.09	2.09	2.12	2.6	1.07	2.07	1.09	1.31	2.225	1.385
ENSG00000124496	TRERF1	transcriptional regulating factor 1 [Source:HGNC Symbol;Acc:HGNC:18273]	0.644075537	-0.634698199	0.004594263	0.053107154	yes	down	0.41	0.44	0.42	0.31	0.32	0.32	0.38	0.3	0.395	0.33
ENSG00000254739		novel transcript	2.11945422	1.083692804	0.004622005	0.053376992	yes	up	0.86	0.83	0.79	0.67	0.8	1.73	0.61	1.67	0.7875	1.2025
ENSG00000287416		novel transcript	0.636415068	-0.651960101	0.004641466	0.053571138	yes	down	0.94	0.78	1.02	1.07	0.64	0.5	0.65	0.59	0.9525	0.595
ENSG00000230910		novel transcript	0.495711965	-1.012426012	0.004699319	0.054115312	yes	down	0.86	0.74	0.81	0.61	0.24	0.55	0.22	0.29	0.755	0.325
ENSG00000288700		novel transcrpt	0.349877081	-1.51507993	0.004701479	0.054129911	yes	down	0.59	0.11	0.6	0	0	0.22	0.17	0.06	0.325	0.1125
ENSG00000102302	FGD1	FYVE, RhoGEF and PH domain containing 1 [Source:HGNC Symbol;Acc:HGNC:3663]	0.454228835	-1.138508801	0.004708903	0.054194819	yes	down	0.19	0.2	0.23	0.36	0.13	0.07	0.16	0.08	0.245	0.11
ENSG00000233175		novel transcript, antisense to FMNL1	1.855649292	0.891924075	0.004788355	0.054942462	yes	up	1.18	0.39	0.2	0.63	0.82	0.54	1.14	1.42	0.6	0.98
ENSG00000216649	GAGE12E	G antigen 12E [Source:HGNC Symbol;Acc:HGNC:31905]	0.052783139	-4.243779042	0.004823264	0.055290719	yes	down	0.43	0	1.4	0	0	0	0	0	0.4575	0
ENSG00000261790		novel transcript	1.589468679	0.668544588	0.004829364	0.055350185	yes	up	0.63	0.91	0.94	1.47	2.21	1.36	1.38	1.47	0.9875	1.605
ENSG00000260515		novel transcript	0.051764417	-4.271895467	0.004845131	0.055509924	yes	down	0.05	0.19	0	0	0	0	0	0	0.06	0
ENSG00000233626		protein (peptidyl-prolyl cis\\/trans isomerase) NIMA-interacting, 4 (parvulin) (PIN4) pseudogene	10.08210959	3.333725636	0.004885273	0.055885391	yes	up	0	0	0.39	0	3.03	0.48	0.87	1.76	0.0975	1.535
ENSG00000221836	OR2A5	olfactory receptor family 2 subfamily A member 5 [Source:HGNC Symbol;Acc:HGNC:8232]	18.68179776	4.223561388	0.004899061	0.056000879	yes	up	0	0	0	0	0.02	0	0.02	0.02	0	0.015
ENSG00000133519	ZDHHC8P1	ZDHHC8 pseudogene 1 [Source:HGNC Symbol;Acc:HGNC:26461]	0.297885629	-1.747169569	0.004919823	0.056217022	yes	down	0.58	0.15	0.17	0.28	0.08	0.09	0.11	0	0.295	0.07
ENSG00000226268		solute carrier family 25, member 33 (SLC25A33) pseudogene	0.052284838	-4.257463545	0.004953241	0.056534983	yes	down	0.78	0	0	0	0	0	0	0	0.195	0
ENSG00000227855	DPY19L2P3	DPY19L2 pseudogene 3 [Source:HGNC Symbol;Acc:HGNC:22367]	0.545102785	-0.875399804	0.004982426	0.056836008	yes	down	0.75	1.4	1.03	1.15	0.48	0.4	0.56	0.54	1.0825	0.495
ENSG00000099769	IGFALS	insulin like growth factor binding protein acid labile subunit [Source:HGNC Symbol;Acc:HGNC:5468]	4.276597517	2.096463437	0.005037226	0.057374822	yes	up	0.03	0.13	0.09	0	0.1	0.38	0.26	0.1	0.0625	0.21
ENSG00000268870		novel zinc finger protein	0.23319185	-2.100410727	0.005054784	0.057553196	yes	down	0.87	0.83	0.79	1.87	0.25	0.2	0	0.48	1.09	0.2325
ENSG00000284602		novel transcript	0.561067206	-0.833754504	0.005063348	0.057639885	yes	down	0.93	0.85	0.91	0.94	0.6	0.58	0.31	0.51	0.9075	0.5
ENSG00000267075		novel transcript, piRNA host	2.463105201	1.300478247	0.005064463	0.057630949	yes	up	0.1	0.07	0.05	0.09	0.21	0.08	0.26	0.2	0.0775	0.1875
ENSG00000251867		novel transcript, antisense to ZBTB10	0.589868907	-0.761533731	0.00508144	0.05779162	yes	down	2.26	1.32	1.38	1.19	1.11	0.42	0.98	0.9	1.5375	0.8525
ENSG00000259540		novel transcript, antisense to LINS1	3.955191525	1.983747557	0.005081642	0.057783079	yes	up	0	0.34	0.43	0.3	0.98	0.49	0.65	2.33	0.2675	1.1125
ENSG00000169282	KCNAB1	potassium voltage-gated channel subfamily A member regulatory beta subunit 1 [Source:HGNC Symbol;Acc:HGNC:6228]	0.400460743	-1.320267274	0.005094886	0.057911969	yes	down	0.17	0.15	0.17	0.3	0.06	0.15	0.06	0.04	0.1975	0.0775
ENSG00000237669		HLA complex group 4 pseudogene 3	2.16302394	1.113049633	0.005097093	0.0579262	yes	up	0.82	0.68	0.64	0.46	1.64	1.13	1.51	1.24	0.65	1.38
ENSG00000233332		novel transcript	9.959619802	3.31609067	0.005125671	0.058174689	yes	up	0	0.04	0	0	0.16	0.12	0.16	0.13	0.01	0.1425
ENSG00000237979	DNAJB12P1	DNAJB12 pseudogene 1 [Source:HGNC Symbol;Acc:HGNC:54762]	0.052872253	-4.241345378	0.005144743	0.058358392	yes	down	0.23	0.47	0.1	0.21	0	0	0	0	0.2525	0
ENSG00000215910	C1orf167	chromosome 1 open reading frame 167 [Source:HGNC Symbol;Acc:HGNC:25262]	0.519046092	-0.946065437	0.005146063	0.058362453	yes	down	1.27	4.3	3.52	0.72	2.47	1.21	0.07	1.24	2.4525	1.2475
ENSG00000215808	LINC01139	long intergenic non-protein coding RNA 1139 [Source:HGNC Symbol;Acc:HGNC:27924]	0.48402851	-1.046836068	0.005177135	0.058670971	yes	down	0.39	0.53	0.33	0.53	0.37	0.2	0.35	0.1	0.445	0.255
ENSG00000268061	NAPA-AS1	NAPA antisense RNA 1 [Source:HGNC Symbol;Acc:HGNC:44118]	2.171647029	1.118789632	0.005179814	0.05869037	yes	up	0.56	1	0.62	0.12	1.09	1.34	0.69	0.52	0.575	0.91
ENSG00000260287	TBC1D3G	TBC1 domain family member 3G [Source:HGNC Symbol;Acc:HGNC:29860]	0.052711482	-4.245738927	0.005207771	0.05898511	yes	down	0.13	0.29	0	0	0	0	0	0	0.105	0
ENSG00000253366	GUSBP16	GUSB pseudogene 16 [Source:HGNC Symbol;Acc:HGNC:54498]	0.052921155	-4.240011649	0.005245597	0.059347057	yes	down	0.97	0.45	0	0	0	0	0	0	0.355	0
ENSG00000283199	C13orf46	chromosome 13 open reading frame 46 [Source:HGNC Symbol;Acc:HGNC:53786]	4.641391673	2.214557447	0.005273896	0.059633849	yes	up	0.03	0	0	0.05	0.1	0.26	0.13	0.03	0.02	0.13
ENSG00000228175	GEMIN8P4	gem nuclear organelle associated protein 8 pseudogene 4 [Source:HGNC Symbol;Acc:HGNC:37979]	1.625950171	0.701283045	0.005310211	0.059999752	yes	up	3.33	2.67	3.21	2.77	4.52	4.09	4.72	5.8	2.995	4.7825
ENSG00000170439	METTL7B	methyltransferase like 7B [Source:HGNC Symbol;Acc:HGNC:28276]	0.289107377	-1.790322674	0.005372874	0.060617446	yes	down	0.33	0.41	0.43	0.64	0.16	0.11	0.11	0.12	0.4525	0.125
ENSG00000287817		novel transcript, antisense to EIF4ENIF1	0.420607415	-1.249453811	0.005389896	0.060764289	yes	down	1.86	1.43	1.19	1.2	0.84	0.29	0.86	0.3	1.42	0.5725
ENSG00000124253	PCK1	phosphoenolpyruvate carboxykinase 1 [Source:HGNC Symbol;Acc:HGNC:8724]	0.545416665	-0.874569313	0.005390044	0.060754668	yes	down	0.43	0.39	0.52	0.31	0.42	0.71	0.35	0.18	0.4125	0.415
ENSG00000286938		novel transcript	0.053896545	-4.2136634	0.005444498	0.061300115	yes	down	0	0.44	0.36	0.1	0	0	0	0	0.225	0
ENSG00000276348		novel transcript	18.17153893	4.1836087	0.005451031	0.061350899	yes	up	0	0	0	0	0.08	0	0.2	0	0	0.07
ENSG00000175906	ARL4D	ADP ribosylation factor like GTPase 4D [Source:HGNC Symbol;Acc:HGNC:656]	0.636659668	-0.651405722	0.005526042	0.062034014	yes	down	2	2.28	1.82	1.76	1.4	1.08	1.25	1.16	1.965	1.2225
ENSG00000287766		novel transcript	0.054188312	-4.205874484	0.005526416	0.062026732	yes	down	0.21	0	0.13	0.1	0	0	0	0	0.11	0
ENSG00000234405		novel transcript	3.731951978	1.899930422	0.005538222	0.062136245	yes	up	0.51	0.4	0	0.06	0.24	0.34	1	2.23	0.2425	0.9525
ENSG00000235314	LINC00957	long intergenic non-protein coding RNA 957 [Source:HGNC Symbol;Acc:HGNC:22332]	0.569262489	-0.812834056	0.005564851	0.062423473	yes	down	0.85	0.97	0.74	0.68	0.47	0.35	0.58	0.32	0.81	0.43
ENSG00000110852	CLEC2B	C-type lectin domain family 2 member B [Source:HGNC Symbol;Acc:HGNC:2053]	0.648971504	-0.623772964	0.005605561	0.062810447	yes	down	1.71	3.04	2.58	2.68	2.03	1.35	2.08	1.03	2.5025	1.6225
ENSG00000271672	DUXAP8	double homeobox A pseudogene 8 [Source:HGNC Symbol;Acc:HGNC:32187]	1.868119449	0.901586705	0.005635271	0.063085087	yes	up	0	2.71	1.72	4.07	2.38	5.26	0.63	7.44	2.125	3.9275
ENSG00000163467	TSACC	TSSK6 activating cochaperone [Source:HGNC Symbol;Acc:HGNC:30636]	2.341544896	1.2274607	0.005779169	0.064564921	yes	up	1.05	0	1.89	0.87	2.53	3.1	1.65	2.52	0.9525	2.45
ENSG00000236359	OR51B8P	olfactory receptor family 51 subfamily B member 8 pseudogene [Source:HGNC Symbol;Acc:HGNC:31279]	2.143376552	1.099885327	0.005845516	0.065186099	yes	up	0.83	0.86	0.61	1.44	2.37	1.53	1.15	2.86	0.935	1.9775
ENSG00000171951	SCG2	secretogranin II [Source:HGNC Symbol;Acc:HGNC:10575]	1.526179967	0.609925095	0.005908797	0.065819178	yes	up	1.02	0.81	0.77	0.89	1.03	1.39	1.35	1.44	0.8725	1.3025
ENSG00000232630	PRPS1P2	phosphoribosyl pyrophosphate synthetase 1 pseudogene 2 [Source:HGNC Symbol;Acc:HGNC:9464]	2.029408007	1.021058944	0.005941712	0.066149383	yes	up	0.71	0.92	1.08	0.58	1.78	1.67	1.99	1.17	0.8225	1.6525
ENSG00000251537		novel tripartite motif-containing 16 (TRIM16) and CMT1A duplicated region transcript 1 (CDRT1) protein	0.556179847	-0.846376624	0.005991034	0.066612922	yes	down	0.19	1.5	0.67	0.49	0.69	0.57	0.18	0.05	0.7125	0.3725
ENSG00000251600		novel transcript, antisense to GYPA	2.10201345	1.0717719	0.005998239	0.066644167	yes	up	0.22	0.3	0.96	0.37	1.78	0.93	1.3	0.7	0.4625	1.1775
ENSG00000249936	RAC1P2	Rac family small GTPase 1 pseudogene 2 [Source:HGNC Symbol;Acc:HGNC:31414]	17.77427232	4.151718592	0.006015302	0.066821516	yes	up	0	0	0	0	0.51	0.47	0	0.53	0	0.3775
ENSG00000213285	RPL23AP45	ribosomal protein L23a pseudogene 45 [Source:HGNC Symbol;Acc:HGNC:36896]	0.274689586	-1.86412588	0.006068473	0.067325872	yes	down	2.54	0.41	2.56	2.83	0	0.97	0	1.23	2.085	0.55
ENSG00000257607		novel transcript, antisense to GPR146	0.409707551	-1.287333614	0.006084739	0.067481647	yes	down	0.2	0.67	0.94	0.62	0.33	0.16	0.47	0	0.6075	0.24
ENSG00000261033	SPECC1-DT	SPECC1 divergent transcript [Source:HGNC Symbol;Acc:HGNC:55376]	17.7156545	4.146952861	0.006113846	0.067767282	yes	up	0	0	0	0	0.13	0.06	0.06	0.26	0	0.1275
ENSG00000114541	FRMD4B	FERM domain containing 4B [Source:HGNC Symbol;Acc:HGNC:24886]	0.493172039	-1.019837087	0.006120703	0.067818512	yes	down	0.57	0.27	0.33	1.19	0.32	0.07	0.87	0.57	0.59	0.4575
ENSG00000275902		novel transcript, antisense to HGS	0.062666821	-3.996154388	0.00618407	0.068445615	yes	down	0	0	0	1.3	0.02	0	0	0	0.325	0.005
ENSG00000119630	PGF	placental growth factor [Source:HGNC Symbol;Acc:HGNC:8893]	0.293048756	-1.770787384	0.006204216	0.068656071	yes	down	0.24	0.44	0.29	0.21	0.08	0.12	0.06	0.06	0.295	0.08
ENSG00000259498	TPM1-AS	TPM1 antisense RNA [Source:HGNC Symbol;Acc:HGNC:53635]	0.129230775	-2.951978417	0.006244072	0.068996432	yes	down	0.11	0.11	0.09	0	0.02	0.01	0	0	0.0775	0.0075
ENSG00000278954		novel transcript	0.24530195	-2.027369391	0.006244373	0.068987181	yes	down	0.22	0.23	0.21	0.05	0.05	0.03	0.08	0	0.1775	0.04
ENSG00000279799		TEC	0.467324888	-1.097502222	0.006326349	0.069765798	yes	down	4.56	5.99	4.15	5.66	1.15	2.8	2.89	2.37	5.09	2.3025
ENSG00000163217	BMP10	bone morphogenetic protein 10 [Source:HGNC Symbol;Acc:HGNC:20869]	5.003992967	2.323079762	0.006337271	0.069873543	yes	up	0.01	0.01	0.02	0	0.07	0.06	0.02	0.06	0.01	0.0525
ENSG00000218426		60S ribosomal protein L27a (RPL27A) pseudogene	17.55569486	4.133867195	0.00635785	0.070074961	yes	up	0	0	0	0	0	2.04	0	0.56	0	0.65
ENSG00000167874	TMEM88	transmembrane protein 88 [Source:HGNC Symbol;Acc:HGNC:32371]	0.056062648	-4.1568163	0.006375943	0.070197864	yes	down	0.25	0.07	0.18	0.47	0	0	0	0	0.2425	0
ENSG00000128512	DOCK4	dedicator of cytokinesis 4 [Source:HGNC Symbol;Acc:HGNC:19192]	0.614790976	-0.701832105	0.006389148	0.070330474	yes	down	1.2	0.65	1.55	0.96	0.5	0.51	0.48	0.63	1.09	0.53
ENSG00000256977	LIMS3	LIM zinc finger domain containing 3 [Source:HGNC Symbol;Acc:HGNC:30047]	2.260251254	1.176483154	0.006404581	0.070487572	yes	up	0.38	0.66	0	0.71	0.63	0.64	1.47	1.11	0.4375	0.9625
ENSG00000278965		tec	17.47865489	4.127522258	0.006471986	0.071151973	yes	up	0	0	0	0	0.02	0.06	0	0.08	0	0.04
ENSG00000179256	SMCO3	single-pass membrane protein with coiled-coil domains 3 [Source:HGNC Symbol;Acc:HGNC:34401]	17.45786583	4.1258053	0.006483371	0.071238401	yes	up	0	0	0	0	0	0.1	0.1	0.07	0	0.0675
ENSG00000272991		novel transcript, antisense to BRWD1	0.302026583	-1.727252559	0.006487909	0.071249547	yes	down	2.88	2.56	2.79	3.09	0	1.33	1.39	0.53	2.83	0.8125
ENSG00000226979	LTA	lymphotoxin alpha [Source:HGNC Symbol;Acc:HGNC:6709]	17.43353568	4.123793286	0.006507925	0.071443493	yes	up	0	0	0	0	0	0.19	0.14	0.05	0	0.095
ENSG00000249396	LINC02212	long intergenic non-protein coding RNA 2212 [Source:HGNC Symbol;Acc:HGNC:53079]	0.498289217	-1.004944742	0.00653392	0.071702922	yes	down	0.64	0.47	0.97	0.86	0.72	0.8	0.19	0.27	0.735	0.495
ENSG00000149131	SERPING1	serpin family G member 1 [Source:HGNC Symbol;Acc:HGNC:1228]	0.412951041	-1.275957348	0.006562726	0.071979971	yes	down	0.45	0.61	0.6	0.34	0.14	0.15	0.15	0.34	0.5	0.195
ENSG00000254589	EIF4A2P3	eukaryotic translation initiation factor 4A2 pseudogene 3 [Source:HGNC Symbol;Acc:HGNC:45100]	17.37796261	4.119187045	0.006565052	0.071992462	yes	up	0	0	0	0	0.22	0.22	0	0.15	0	0.1475
ENSG00000255008	LINC02739	long intergenic non-protein coding RNA 2739 [Source:HGNC Symbol;Acc:HGNC:54256]	0.569921652	-0.811164493	0.006569514	0.072028379	yes	down	8.21	9.84	7.91	10.63	4.67	5.33	1.76	7.33	9.1475	4.7725
ENSG00000260329		novel transcript, antisense to C12orf23	0.661338397	-0.596539428	0.006612247	0.072405294	yes	down	2.58	2.53	2.46	2.11	1.43	1.62	1.55	1.67	2.42	1.5675
ENSG00000270025	BMS1P7	BMS1 pseudogene 7 [Source:HGNC Symbol;Acc:HGNC:23655]	17.28545213	4.111486435	0.006613545	0.072406442	yes	up	0	0	0	0	0.39	0.08	0	0	0	0.1175
ENSG00000284740		ATPase family, AAA domain containing 3C (ATAD3C) pseudogene	17.30177736	4.112848344	0.006643407	0.072667805	yes	up	0	0	0	0	0.29	0.15	0.73	0	0	0.2925
ENSG00000169059	VCX3A	variable charge X-linked 3A [Source:HGNC Symbol;Acc:HGNC:18159]	0.35332579	-1.500929034	0.006694446	0.073146948	yes	down	0.74	0.56	1.28	0.98	0.3	0.57	0.15	0.21	0.89	0.3075
ENSG00000279863		TEC	0.580263433	-0.785220079	0.006704338	0.073202293	yes	down	1.27	1.37	1.5	1.37	0.74	0.85	0.89	0.65	1.3775	0.7825
ENSG00000136235	GPNMB	glycoprotein nmb [Source:HGNC Symbol;Acc:HGNC:4462]	0.459543259	-1.12172742	0.006744567	0.073548883	yes	down	0.98	1.02	1.21	1.33	0.5	0.62	0.29	0.63	1.135	0.51
ENSG00000127366	TAS2R5	taste 2 receptor member 5 [Source:HGNC Symbol;Acc:HGNC:14912]	1.803721682	0.850976745	0.006838324	0.074464207	yes	up	0.81	0.98	0.88	1.14	2.33	1.2	1.25	1.99	0.9525	1.6925
ENSG00000137094	DNAJB5	DnaJ heat shock protein family (Hsp40) member B5 [Source:HGNC Symbol;Acc:HGNC:14887]	0.44877592	-1.155932826	0.00684096	0.074479536	yes	down	0.43	0.32	0.71	0.42	0.84	0.19	0.12	0.12	0.47	0.3175
ENSG00000230487	PSMG3-AS1	PSMG3 antisense RNA 1 (head to head) [Source:HGNC Symbol;Acc:HGNC:22230]	1.749615594	0.807037984	0.006896433	0.075016174	yes	up	0.43	0.88	0.33	1.41	2.1	1.15	1.01	0.66	0.7625	1.23
ENSG00000279872		novel transcript	0.576509148	-0.794584595	0.006952024	0.075553134	yes	down	100.85	71.43	59.44	69.79	46.29	51.24	44.32	35.07	75.3775	44.23
ENSG00000279987		novel transcript	2.427842749	1.279674982	0.007036778	0.076378443	yes	up	0.13	0.54	0.23	0.49	1.25	0.84	0.57	0.66	0.3475	0.83
ENSG00000239322	ATP6V1B1-AS1	ATP6V1B1 antisense RNA 1 [Source:HGNC Symbol;Acc:HGNC:51118]	0.581752445	-0.781522727	0.007038604	0.076384587	yes	down	1.91	2.45	2.84	1.59	1.19	1.25	0.83	1.74	2.1975	1.2525
ENSG00000133874	RNF122	ring finger protein 122 [Source:HGNC Symbol;Acc:HGNC:21147]	0.606155098	-0.722241109	0.007047776	0.076456769	yes	down	0.89	1.09	1.42	1.65	0.72	0.73	0.91	0.65	1.2625	0.7525
ENSG00000231889	TRAF3IP2-AS1	TRAF3IP2 antisense RNA 1 [Source:HGNC Symbol;Acc:HGNC:40005]	1.629250214	0.704208184	0.007057632	0.076550006	yes	up	2.71	1.41	2.38	2.76	4.24	3.48	3.05	2.94	2.315	3.4275
ENSG00000186019		novel transcript, antisense to ZNF225 and ZNF224	0.474183791	-1.076481748	0.00709224	0.076829227	yes	down	0.15	0.09	0.21	0.42	0.09	0.04	0.19	0.03	0.2175	0.0875
ENSG00000228144		novel protein	16.97391673	4.0852476	0.007176685	0.077674646	yes	up	0	0	0	0	0	0	0.63	0	0	0.1575
ENSG00000278769		novel transcript, antisense to CDAN1	1.879228334	0.910140371	0.00725511	0.078425511	yes	up	1.88	0.83	1.17	1.14	2.33	1.94	2.81	2.18	1.255	2.315
ENSG00000225513		ribosomal protein L29 (RPL29) pseudogene	0.057870629	-4.111024866	0.007270459	0.078549439	yes	down	0.06	0.84	0	1.62	0	0	0	0	0.63	0
ENSG00000146090	RASGEF1C	RasGEF domain family member 1C [Source:HGNC Symbol;Acc:HGNC:27400]	2.232670777	1.158770531	0.007302246	0.078850735	yes	up	0.32	0.12	0.18	0.81	0.4	0.26	0.3	0.8	0.3575	0.44
ENSG00000251952	RNU6-1219P	RNA, U6 small nuclear 1219, pseudogene [Source:HGNC Symbol;Acc:HGNC:48182]	0.657210126	-0.605573385	0.00730698	0.078873777	yes	down	3.16	3.5	3.55	3.39	1.73	2.11	3.28	2.33	3.4	2.3625
ENSG00000173349	SFT2D3	SFT2 domain containing 3 [Source:HGNC Symbol;Acc:HGNC:28767]	0.05737848	-4.123346449	0.007339907	0.079158781	yes	down	0	0.14	0	0	0	0	0	0	0.035	0
ENSG00000175183	CSRP2	cysteine and glycine rich protein 2 [Source:HGNC Symbol;Acc:HGNC:2470]	0.591679395	-0.757112441	0.00739982	0.079734046	yes	down	2.78	3.37	2.43	2.86	1.17	1.6	1.86	1.15	2.86	1.445
ENSG00000285959		novel transcript	1.902460473	0.927866479	0.007407855	0.079792283	yes	up	1.31	0.96	0.57	0.64	1.54	1.05	2.3	1.57	0.87	1.615
ENSG00000276412		novel transcript	0.501743273	-0.994978726	0.007446577	0.080180897	yes	down	1.2	1.77	1.43	1.27	0.44	0.37	0.66	1.31	1.4175	0.695
ENSG00000187513	GJA4	gap junction protein alpha 4 [Source:HGNC Symbol;Acc:HGNC:4278]	0.522405464	-0.936758108	0.007471327	0.08041884	yes	down	1.21	0.69	1.23	0.83	0.38	0.57	0.56	0.36	0.99	0.4675
ENSG00000130751	NPAS1	neuronal PAS domain protein 1 [Source:HGNC Symbol;Acc:HGNC:7894]	0.640151774	-0.6435141	0.007480214	0.080500212	yes	down	1.67	3.83	1.66	3.26	1.98	1.32	2.72	1.71	2.605	1.9325
ENSG00000130300	PLVAP	plasmalemma vesicle associated protein [Source:HGNC Symbol;Acc:HGNC:13635]	2.320779601	1.21460952	0.007487184	0.08056093	yes	up	0.21	0.12	0.1	0.28	0.43	0.55	0.23	1.31	0.1775	0.63
ENSG00000224429	LINC00539	long intergenic non-protein coding RNA 539 [Source:HGNC Symbol;Acc:HGNC:43672]	0.425846281	-1.231595343	0.007495955	0.080626709	yes	down	0.76	1.31	0.69	1.02	0.29	0.33	0.23	0.58	0.945	0.3575
ENSG00000267733		solute carrier family 5 (low affinity glucose cotransporter), member 4 (SLC5A4) pseudogene	3.029030726	1.598856212	0.007495964	0.080612507	yes	up	0.23	0.16	0.63	0.1	0.87	0.98	0.58	0.63	0.28	0.765
ENSG00000180015		mitochondrial translational release factor 1-like (MTRF1L) pseudogene	0.469282973	-1.091469978	0.007537798	0.080961934	yes	down	1.21	1.21	1.37	0.74	0.48	0.57	0.37	0.67	1.1325	0.5225
ENSG00000270757	HSPE1-MOB4	HSPE1-MOB4 readthrough [Source:HGNC Symbol;Acc:HGNC:49184]	0.445442228	-1.166689763	0.007667696	0.082240652	yes	down	0.89	2.91	1.3	0.58	1.21	0	1.2	0	1.42	0.6025
ENSG00000253389		novel transcript, antisense to ANK1	1.729378103	0.790253328	0.007715501	0.082680298	yes	up	1.78	1.61	1.09	0.42	1.95	2.18	2.03	2.3	1.225	2.115
ENSG00000267322	SNHG22	small nucleolar RNA host gene 22 [Source:HGNC Symbol;Acc:HGNC:50285]	1.975859124	0.982480088	0.007734669	0.082841802	yes	up	3.98	3.44	3.13	2.89	5.34	8.74	6.28	6.77	3.36	6.7825
ENSG00000162461	SLC25A34	solute carrier family 25 member 34 [Source:HGNC Symbol;Acc:HGNC:27653]	2.077170768	1.054619827	0.007743095	0.082917408	yes	up	0.1	0.2	0.33	0.26	0.51	0.46	0.37	0.28	0.2225	0.405
ENSG00000182168	UNC5C	unc-5 netrin receptor C [Source:HGNC Symbol;Acc:HGNC:12569]	0.432914249	-1.207846807	0.007801049	0.083434919	yes	down	0.13	0.2	0.05	0.19	0.11	0.01	0.04	0.05	0.1425	0.0525
ENSG00000258477	PPIAP6	peptidylprolyl isomerase A pseudogene 6 [Source:HGNC Symbol;Acc:HGNC:20028]	0.059683826	-4.066516171	0.008001127	0.085214249	yes	down	0.76	0	0.9	0.23	0	0	0	0	0.4725	0
ENSG00000260583		novel transcript, antisense to MRPL39	0.059322614	-4.075274026	0.008071214	0.085870241	yes	down	1.22	0	0	0.38	0	0	0	0	0.4	0
ENSG00000259241		novel transcript	0.059332395	-4.075036182	0.008078495	0.085917566	yes	down	0.3	0.32	0.17	0	0	0	0	0	0.1975	0
ENSG00000282419	TEX13D	TEX13 family member D [Source:HGNC Symbol;Acc:HGNC:52278]	5.511913788	2.462553323	0.008091026	0.086005612	yes	up	0	0.05	0.03	0	0.22	0.04	0.34	0.05	0.02	0.1625
ENSG00000286989		novel transcript	0.570507898	-0.809681236	0.008131115	0.086401467	yes	down	0.5	1.31	1.23	1.08	0.51	0.68	0.37	0.74	1.03	0.575
ENSG00000113231	PDE8B	phosphodiesterase 8B [Source:HGNC Symbol;Acc:HGNC:8794]	0.478876938	-1.062273136	0.008141728	0.086499083	yes	down	0.27	0.26	0.26	0.31	0.09	0.13	0.22	0.1	0.275	0.135
ENSG00000128886	ELL3	elongation factor for RNA polymerase II 3 [Source:HGNC Symbol;Acc:HGNC:23113]	0.520255569	-0.942707593	0.008166679	0.086718606	yes	down	1.29	1.44	1.01	2.27	0.81	0.67	1.13	0.41	1.5025	0.755
ENSG00000128917	DLL4	delta like canonical Notch ligand 4 [Source:HGNC Symbol;Acc:HGNC:2910]	0.447986719	-1.158472133	0.008169934	0.086737988	yes	down	0.23	0.55	0.21	0.32	0.13	0.18	0.07	0.14	0.3275	0.13
ENSG00000286999		novel transcript, antisense to OPRL1	0.05982547	-4.063096366	0.008253555	0.08753386	yes	down	0.02	0.04	0	0.08	0	0	0	0	0.035	0
ENSG00000179178	TMEM125	transmembrane protein 125 [Source:HGNC Symbol;Acc:HGNC:28275]	0.059917003	-4.060890722	0.0082872	0.087783255	yes	down	0.12	0.04	0.03	0.11	0	0	0	0	0.075	0
ENSG00000256101		novel transcript	0.185407924	-2.431225193	0.008291891	0.087817614	yes	down	0.88	1.1	0.61	0.66	0.33	0	0	0.18	0.8125	0.1275
ENSG00000267633		novel transcript, antisense to MRI1	0.188339201	-2.408594778	0.008301067	0.087899442	yes	down	0	0	1.89	3.76	0	0	0	1.03	1.4125	0.2575
ENSG00000249462	MLLT10P2	MLLT10 pseudogene 2 [Source:HGNC Symbol;Acc:HGNC:39141]	0.059991708	-4.059093088	0.008315928	0.088010726	yes	down	4.09	4.15	3.25	3.6	0	0	0	0	3.7725	0
ENSG00000228933		novel transcript	0.292526793	-1.773359323	0.008350792	0.088287289	yes	down	0.11	0.49	0.33	1.29	0.1	0.35	0	0.17	0.555	0.155
ENSG00000278000		novel transcript	2.237721732	1.162030644	0.008356267	0.088329776	yes	up	1.2	0.93	1.29	0.42	1.28	2.7	2.02	2.55	0.96	2.1375
ENSG00000197747	S100A10	S100 calcium binding protein A10 [Source:HGNC Symbol;Acc:HGNC:10487]	0.482404832	-1.051683736	0.008381063	0.08857645	yes	down	2.78	1.98	2.53	2.47	1.81	1.61	0.71	0.51	2.44	1.16
ENSG00000205212	CCDC144NL	CCDC144A N-terminal pseudogene [Source:HGNC Symbol;Acc:HGNC:33735]	0.573284471	-0.802676895	0.008394197	0.088699805	yes	down	1.16	0.69	1.7	1.32	0.33	0.96	1.26	0.41	1.2175	0.74
ENSG00000010319	SEMA3G	semaphorin 3G [Source:HGNC Symbol;Acc:HGNC:30400]	0.288961098	-1.791052816	0.008400111	0.088700494	yes	down	0.28	0.15	0.08	0.05	0	0.05	0.02	0.03	0.14	0.025
ENSG00000175274	TP53I11	tumor protein p53 inducible protein 11 [Source:HGNC Symbol;Acc:HGNC:16842]	0.576707223	-0.794089004	0.008415488	0.088847399	yes	down	0.84	0.86	0.36	0.83	0.49	0.33	0.77	0.43	0.7225	0.505
ENSG00000259006		novel transcript, antisense to MC1R	0.188927226	-2.404097474	0.008475411	0.08940225	yes	down	0.61	0	0.7	0.18	0	0	0.25	0	0.3725	0.0625
ENSG00000203724	C1orf53	chromosome 1 open reading frame 53 [Source:HGNC Symbol;Acc:HGNC:30003]	1.779179572	0.831212129	0.008532215	0.089907645	yes	up	2.3	2.02	2.59	3.86	4.54	4.87	2.93	6.17	2.6925	4.6275
ENSG00000214248		novel transcript, antisense to LRRC8E	4.533051618	2.180482589	0.008556705	0.090150042	yes	up	0	0.06	0	0	0.03	0	0.05	0.2	0.015	0.07
ENSG00000143387	CTSK	cathepsin K [Source:HGNC Symbol;Acc:HGNC:2536]	1.518620662	0.602761543	0.008574531	0.090259473	yes	up	0.55	1.29	1.11	1.27	1.09	1.03	2.05	1.63	1.055	1.45
ENSG00000288538		novel transcript, antisense to KCTD21	2.905994221	1.539031834	0.008600525	0.090501693	yes	up	0.08	0.08	0.03	0.3	0.46	0.24	0.39	0.37	0.1225	0.365
ENSG00000259515		novel transcript, antisense to CDC42BPB	2.616334827	1.387547182	0.008700166	0.091375844	yes	up	0.14	0.68	0.45	0.44	1.46	1.14	1.33	0.53	0.4275	1.115
ENSG00000162989	KCNJ3	potassium inwardly rectifying channel subfamily J member 3 [Source:HGNC Symbol;Acc:HGNC:6264]	0.061043868	-4.0340098	0.00870389	0.091383311	yes	down	0.2	0.02	0.13	0	0	0	0	0	0.0875	0
ENSG00000170190	SLC16A5	solute carrier family 16 member 5 [Source:HGNC Symbol;Acc:HGNC:10926]	0.601656174	-0.732988824	0.008714384	0.091477663	yes	down	0.93	1.16	1.21	1.25	0.62	0.73	0.87	0.5	1.1375	0.68
ENSG00000258225		novel transcript, antisense to NAV3	0.060475093	-4.047515119	0.008756381	0.091823181	yes	down	1.28	0.59	0	0.3	0	0	0	0	0.5425	0
ENSG00000272909		novel transcript, antisense to MTHFD1	0.276311396	-1.855633028	0.00877287	0.091980193	yes	down	0.14	0.34	0.25	0.28	0	0.14	0	0.13	0.2525	0.0675
ENSG00000279352		TEC	1.566097807	0.647174316	0.008813749	0.092360906	yes	up	5.23	7.78	4.51	4.33	9.39	5.16	11.71	3.94	5.4625	7.55
ENSG00000117595	IRF6	interferon regulatory factor 6 [Source:HGNC Symbol;Acc:HGNC:6121]	0.187851377	-2.412336403	0.008816313	0.092371812	yes	down	0.1	0.07	0.1	0.07	0.19	0	0	0.02	0.085	0.0525
ENSG00000198547	C20orf203	chromosome 20 open reading frame 203 [Source:HGNC Symbol;Acc:HGNC:26592]	0.060703382	-4.042079296	0.008894803	0.093162008	yes	down	0	0.08	0.02	0	0	0	0	0	0.025	0
ENSG00000271127		novel pseudogene	0.582808518	-0.778906132	0.008920332	0.09339714	yes	down	0.91	0.61	0.77	1.35	0.3	0.66	0.47	0.64	0.91	0.5175
ENSG00000274080		novel transcript	3.484212979	1.800832814	0.008926105	0.093441452	yes	up	0.03	0.03	0.03	0.15	0.12	0.24	0.33	0.16	0.06	0.2125
ENSG00000148832	PAOX	polyamine oxidase [Source:HGNC Symbol;Acc:HGNC:20837]	0.639457459	-0.64507971	0.00900131	0.094147496	yes	down	1.83	2.21	1.23	1.17	1.69	0.79	1.18	1.97	1.61	1.4075
ENSG00000232457	SLC16A6P1	SLC16A6 pseudogene 1 [Source:HGNC Symbol;Acc:HGNC:48932]	0.060627638	-4.043880563	0.009024044	0.094352738	yes	down	0	0.59	0	0	0	0	0	0	0.1475	0
ENSG00000141750	STAC2	SH3 and cysteine rich domain 2 [Source:HGNC Symbol;Acc:HGNC:23990]	0.061488803	-4.023532469	0.009059788	0.094693826	yes	down	0.02	0.06	0.08	0	0	0	0	0	0.04	0
ENSG00000135744	AGT	angiotensinogen [Source:HGNC Symbol;Acc:HGNC:333]	1.716756627	0.779685533	0.009105738	0.095108554	yes	up	0.28	0.26	0.15	0.16	0.49	0.78	0.36	0.62	0.2125	0.5625
ENSG00000118733	OLFM3	olfactomedin 3 [Source:HGNC Symbol;Acc:HGNC:17990]	0.189490156	-2.399805193	0.009175781	0.095790668	yes	down	0.14	0	0.15	0.1	0.02	0.02	0.03	0	0.0975	0.0175
ENSG00000132840	BHMT2	betaine--homocysteine S-methyltransferase 2 [Source:HGNC Symbol;Acc:HGNC:1048]	15.91564884	3.992374068	0.009219367	0.096212574	yes	up	0	0	0	0	0.02	0.03	0.05	0.08	0	0.045
ENSG00000155659	VSIG4	V-set and immunoglobulin domain containing 4 [Source:HGNC Symbol;Acc:HGNC:17032]	0.189723099	-2.398032759	0.009229682	0.096303652	yes	down	0.06	0.15	0.27	0.22	0.06	0.05	0	0	0.175	0.0275
ENSG00000185862	EVI2B	ecotropic viral integration site 2B [Source:HGNC Symbol;Acc:HGNC:3500]	0.537406738	-0.895913686	0.009238632	0.096380458	yes	down	0.63	0.85	1.01	0.6	0.49	0.62	0.09	0.43	0.7725	0.4075
ENSG00000273162		novel transcript	0.65573729	-0.608810155	0.009318649	0.09708166	yes	down	3.7	3.18	4.41	2.46	2.69	1.83	2.45	1.7	3.4375	2.1675
ENSG00000268006	PTOV1-AS1	PTOV1 antisense RNA 1 [Source:HGNC Symbol;Acc:HGNC:44174]	1.994380114	0.995940403	0.009352224	0.097347855	yes	up	0.09	0.26	0.18	0.2	0.35	0.37	0.35	0.36	0.1825	0.3575
ENSG00000280320		novel transcript	0.493862597	-1.017818386	0.009384425	0.097649529	yes	down	7.66	10.82	10.74	8.46	2.4	6.23	6.04	3.59	9.42	4.565
ENSG00000224023	EDRF1-DT	EDRF1 divergent transcript [Source:HGNC Symbol;Acc:HGNC:54128]	10.0393738	3.32759738	0.009423518	0.097972286	yes	up	0	0	0.16	0	0.25	0.42	0.13	0.53	0.04	0.3325
ENSG00000123870	ZNF137P	zinc finger protein 137, pseudogene [Source:HGNC Symbol;Acc:HGNC:12921]	3.722315799	1.896200458	0.009457999	0.09829708	yes	up	0.02	0.09	0.99	2.08	0.35	0.25	2.04	0	0.795	0.66
ENSG00000183873	SCN5A	sodium voltage-gated channel alpha subunit 5 [Source:HGNC Symbol;Acc:HGNC:10593]	0.309050786	-1.694084159	0.009465499	0.098358174	yes	down	0.11	0.52	0.28	0.06	0.01	0.62	0.02	0.13	0.2425	0.195
ENSG00000262304		novel readthrough SHPK-TRPV1 protein	0.504318016	-0.987594329	0.00951805	0.098785796	yes	down	0.31	0.35	0.07	0.26	0	0.05	0.27	0.16	0.2475	0.12
ENSG00000285505		novel protein, ATP1A3-RABAC1 readthrough	0.062574584	-3.998279394	0.009556904	0.099138169	yes	down	0	0	0	0.13	0	0	0	0	0.0325	0
ENSG00000278611	ZNF426-DT	ZNF426 divergent transcript [Source:HGNC Symbol;Acc:HGNC:53777]	0.394073043	-1.34346503	0.009622225	0.099696438	yes	down	0.8	1.46	1.13	1.06	0.38	0.5	0.2	0.61	1.1125	0.4225
ENSG00000242308		pseudogene similar to methionine adenosyltransferase II, alpha (MAT2A)	0.117960083	-3.08362935	0.009700924	0.100374702	yes	down	0.13	0	0.78	0.61	0	0.13	0	0	0.38	0.0325
ENSG00000282993		TEC	0.573126039	-0.803075651	0.00972544	0.100611207	yes	down	83.36	36.41	68.03	71.98	35.91	39.61	41.46	35.48	64.945	38.115
ENSG00000171860	C3AR1	complement C3a receptor 1 [Source:HGNC Symbol;Acc:HGNC:1319]	0.596776213	-0.744738062	0.00976533	0.100955004	yes	down	0.57	0.71	0.49	0.54	0.38	0.24	0.43	0.29	0.5775	0.335
ENSG00000157510	AFAP1L1	actin filament associated protein 1 like 1 [Source:HGNC Symbol;Acc:HGNC:26714]	0.217172399	-2.203087338	0.009792488	0.101166809	yes	down	0.13	0.04	0.02	0.09	0	0.01	0	0.03	0.07	0.01
ENSG00000267655		novel transcript, sense intronic to ATP9B	2.524941182	1.336249781	0.009897504	0.102077891	yes	up	0.79	0.41	0.46	0.62	0.88	1.98	1.15	1.73	0.57	1.435
ENSG00000111644	ACRBP	acrosin binding protein [Source:HGNC Symbol;Acc:HGNC:17195]	0.484408141	-1.045704984	0.00992784	0.102321186	yes	down	0.67	0.87	1.22	2.36	0.89	0.41	0.49	0.28	1.28	0.5175
ENSG00000248302	BNIP3P41	BCL2 interacting protein 3 pseudogene 41 [Source:HGNC Symbol;Acc:HGNC:49721]	0.462317615	-1.113043762	0.009937149	0.102382337	yes	down	1.69	2.01	1.66	2.38	0.99	1.17	1.08	0.36	1.935	0.9
ENSG00000231136		IBR domain containing 3 (IBRDC3) pseudogene	0.115261372	-3.117019	0.010013746	0.103031532	yes	down	1.82	1.25	1.02	3.35	0.57	0	0	0	1.86	0.1425
ENSG00000205704	LINC00634	long intergenic non-protein coding RNA 634 [Source:HGNC Symbol;Acc:HGNC:27930]	4.238348664	2.083502275	0.010022773	0.103089436	yes	up	0.05	0.1	0.04	0.05	2.09	0.94	0.38	0.1	0.06	0.8775
ENSG00000027644	INSRR	insulin receptor related receptor [Source:HGNC Symbol;Acc:HGNC:6093]	0.115287169	-3.116696143	0.010023645	0.103080931	yes	down	0.05	0.03	0.02	0.06	0	0.01	0	0	0.04	0.0025
ENSG00000165269	AQP7	aquaporin 7 [Source:HGNC Symbol;Acc:HGNC:640]	2.394354772	1.259636932	0.010049112	0.103290301	yes	up	0.16	0	0.33	0.69	0.18	0.61	0.43	0.71	0.295	0.4825
ENSG00000170293	CMTM8	CKLF like MARVEL transmembrane domain containing 8 [Source:HGNC Symbol;Acc:HGNC:19179]	0.218080187	-2.197069388	0.010093325	0.103656923	yes	down	0.53	0.21	0.29	0.31	0.16	0.07	0	0.07	0.335	0.075
ENSG00000268049		novel transcript, antisense to ZNF497	2.726381872	1.446987648	0.01011629	0.103857613	yes	up	0.34	0.32	0.12	0.19	0.84	0.66	0.46	0.62	0.2425	0.645
ENSG00000223599		adipose differentiation-related protein (ADFP) pseudogene	0.158560813	-2.656891833	0.010124182	0.103921042	yes	down	0.11	0.24	0.25	0.27	0	0.06	0.06	0	0.2175	0.03
ENSG00000231887	PRH1	proline rich protein HaeIII subfamily 1 [Source:HGNC Symbol;Acc:HGNC:9366]	2.592316918	1.374242102	0.010131239	0.103958299	yes	up	1.6	0.46	0.81	1.6	1.75	1.74	3.21	1.97	1.1175	2.1675
ENSG00000277103		sorting nexin 18 (SNX18) pseudogene	3.910124514	1.96721455	0.010195586	0.104494856	yes	up	0.11	0.35	0	0.21	0.64	0.44	0.54	1.01	0.1675	0.6575
ENSG00000215039	CD27-AS1	CD27 antisense RNA 1 [Source:HGNC Symbol;Acc:HGNC:43896]	0.537753992	-0.894981766	0.010208974	0.104579062	yes	down	2.76	3.4	1.39	1.51	1.74	0.92	1.35	0.99	2.265	1.25
ENSG00000279296	PRAL	p53 regulation associated lncRNA [Source:HGNC Symbol;Acc:HGNC:52646]	15.47074282	3.951470563	0.010225657	0.104732271	yes	up	0	0	0	0	0	0	0.08	0.06	0	0.035
ENSG00000156521	TYSND1	trypsin like peroxisomal matrix peptidase 1 [Source:HGNC Symbol;Acc:HGNC:28531]	1.678908067	0.747523234	0.010251622	0.104962765	yes	up	0.42	0.39	0.36	0.43	0.7	0.75	0.61	0.61	0.4	0.6675
ENSG00000225883	BMS1P11	BMS1 pseudogene 11 [Source:HGNC Symbol;Acc:HGNC:49156]	15.41640234	3.946394224	0.01025377	0.104967049	yes	up	0	0	0	0	0.1	0	0.56	0	0	0.165
ENSG00000232300	FAM215B	family with sequence similarity 215 member B [Source:HGNC Symbol;Acc:HGNC:43639]	1.574559376	0.654948162	0.010254557	0.104957394	yes	up	0.66	0.81	0.76	0.68	1.14	0.77	1.28	1.31	0.7275	1.125
ENSG00000104368	PLAT	plasminogen activator, tissue type [Source:HGNC Symbol;Acc:HGNC:9051]	0.336813036	-1.569980118	0.010255006	0.104944283	yes	down	0.25	0.11	0.22	0.52	0.06	0	0.08	0.09	0.275	0.0575
ENSG00000269404	SPIB	Spi-B transcription factor [Source:HGNC Symbol;Acc:HGNC:11242]	1.794851606	0.84386457	0.010295855	0.105255766	yes	up	0.27	0.39	0.42	1.23	0.63	0.32	1.03	1.17	0.5775	0.7875
ENSG00000248871	TNFSF12-TNFSF13	TNFSF12-TNFSF13 readthrough [Source:HGNC Symbol;Acc:HGNC:33537]	0.063235443	-3.983122785	0.010304303	0.105324383	yes	down	0.29	0	0	0	0	0	0	0	0.0725	0
ENSG00000113389	NPR3	natriuretic peptide receptor 3 [Source:HGNC Symbol;Acc:HGNC:7945]	15.44487458	3.94905625	0.010314407	0.1054099	yes	up	0	0	0	0	0.01	0.02	0	0.22	0	0.0625
ENSG00000183444	OR7E38P	olfactory receptor family 7 subfamily E member 38 pseudogene [Source:HGNC Symbol;Acc:HGNC:8411]	2.005897471	1.004247866	0.010346838	0.105670133	yes	up	1.22	0.55	0.37	0.71	0.79	0.96	1.87	1.99	0.7125	1.4025
ENSG00000227953	LINC01341	long intergenic non-protein coding RNA 1341 [Source:HGNC Symbol;Acc:HGNC:49457]	2.442085163	1.288113512	0.010353074	0.10571602	yes	up	0.02	0.19	0.17	0.13	0.35	0.24	0.46	0.57	0.1275	0.405
ENSG00000250645		family with sequence similarity 136, member A (FAM136A) pseudogene	15.41892887	3.946630641	0.010357348	0.105724075	yes	up	0	0	0	0	0.38	0	0.76	1.54	0	0.67
ENSG00000280046		TEC	2.240740648	1.163975676	0.010373441	0.105834923	yes	up	0.05	0.11	0.06	0	0.25	0.06	0.13	0.03	0.055	0.1175
ENSG00000274893		novel transcript	2.689218577	1.427187021	0.010389553	0.105981479	yes	up	0.07	0.03	0.11	0.21	0.46	0.24	0.25	0.21	0.105	0.29
ENSG00000100298	APOBEC3H	apolipoprotein B mRNA editing enzyme catalytic subunit 3H [Source:HGNC Symbol;Acc:HGNC:24100]	15.3936382	3.94426234	0.010399576	0.106065882	yes	up	0	0	0	0	0.55	0	0.08	0.51	0	0.285
ENSG00000227492		novel transcript	15.34790606	3.939969935	0.01042927	0.106315117	yes	up	0	0	0	0	0.29	0.2	0.1	0.1	0	0.1725
ENSG00000277491		novel transcript	15.37232312	3.942263302	0.010434544	0.106351005	yes	up	0	0	0	0	0	0	1.25	0.51	0	0.44
ENSG00000276255	LINC02809	long intergenic non-protein coding RNA 2809 [Source:HGNC Symbol;Acc:HGNC:54341]	15.36062208	3.941164739	0.010454488	0.106536378	yes	up	0	0	0	0	0.05	0.07	0	0.05	0	0.0425
ENSG00000273165		novel transcript	15.35775042	3.940895003	0.01045945	0.106569047	yes	up	0	0	0	0	0.6	0	0.6	0.93	0	0.5325
ENSG00000248394	FOSL1P1	FOSL1 pseudogene 1 [Source:HGNC Symbol;Acc:HGNC:44055]	15.34938236	3.940108699	0.010472871	0.10666995	yes	up	0	0	0	0	0	0.11	0.52	0.11	0	0.185
ENSG00000278195	SSTR3	somatostatin receptor 3 [Source:HGNC Symbol;Acc:HGNC:11332]	8.660030182	3.114372053	0.010477351	0.10669767	yes	up	0	0	0	0.01	0.07	0	0.04	0.06	0.0025	0.0425
ENSG00000227630	LINC01132	long intergenic non-protein coding RNA 1132 [Source:HGNC Symbol;Acc:HGNC:49444]	1.774352375	0.827292548	0.010483639	0.106743786	yes	up	0.25	0.25	0.28	0.13	0.34	0.42	0.33	0.51	0.2275	0.4
ENSG00000210194	MT-TE	mitochondrially encoded tRNA-Glu (GAA/G) [Source:HGNC Symbol;Acc:HGNC:7479]	3.287115431	1.716822119	0.010492163	0.106812649	yes	up	0	0	0	0	0	0	0	0	0	0
ENSG00000139572	GPR84	G protein-coupled receptor 84 [Source:HGNC Symbol;Acc:HGNC:4535]	15.33483281	3.938740532	0.010497843	0.106852542	yes	up	0	0	0	0	0.09	0.05	0.07	0.1	0	0.0775
ENSG00000122194	PLG	plasminogen [Source:HGNC Symbol;Acc:HGNC:9071]	15.33256946	3.938527582	0.010501975	0.106876663	yes	up	0	0	0	0	0.46	0	0.11	0.56	0	0.2825
ENSG00000259088		novel transcript, antisense to PPP2R5C	15.32421802	3.937741551	0.010515431	0.106995662	yes	up	0	0	0	0	0.3	0.33	1.21	0.31	0	0.5375
ENSG00000254198		Family with sequence similarity 9, member C (FAM9C) pseudogene	0.253059963	-1.982448823	0.010553821	0.107350264	yes	down	1.76	2.39	1.28	4.17	0.29	0.1	0.98	0.8	2.4	0.5425
ENSG00000184441		novel transcript, antisense to C21orf2	1.503737333	0.588552585	0.010565297	0.10744898	yes	up	0.47	0.43	0.41	0.41	0.71	0.6	0.65	0.56	0.43	0.63
ENSG00000249867	LINC02742	long intergenic non-protein coding RNA 2742 [Source:HGNC Symbol;Acc:HGNC:54259]	15.29598177	3.935080804	0.010594705	0.107711951	yes	up	0	0	0	0	0.07	0.14	0.25	0.07	0	0.1325
ENSG00000246130		novel transcript	0.557350935	-0.843342091	0.010644922	0.108095671	yes	down	2.85	4.43	5.49	5.63	3.29	2.52	2.58	1.62	4.6	2.5025
ENSG00000253861	SLC2A3P1	solute carrier family 2 member 3 pseudogene 1 [Source:HGNC Symbol;Acc:HGNC:11008]	0.614958493	-0.701439057	0.010646575	0.108094363	yes	down	0.08	3.74	1.91	0.9	0.24	2.52	1.18	0.01	1.6575	0.9875
ENSG00000236432	MFF-DT	MFF divergent transcript [Source:HGNC Symbol;Acc:HGNC:41067]	3.245331313	1.698365769	0.010663181	0.108226735	yes	up	0.07	0.03	0.03	0.09	0.32	0.13	0.06	0.31	0.055	0.205
ENSG00000263466		novel transcript, antisense to LASP1	15.22566097	3.928432954	0.010683579	0.108397495	yes	up	0	0	0	0	0.95	0	1.28	0	0	0.5575
ENSG00000239969		RB associated KRAB zinc finger (RBAK) pseudogene	0.635008121	-0.655153052	0.010702488	0.108516753	yes	down	6.37	8.42	6.41	7.07	2.27	3.36	4.63	7.09	7.0675	4.3375
ENSG00000105427	CNFN	cornifelin [Source:HGNC Symbol;Acc:HGNC:30183]	0.241416378	-2.050404542	0.010718677	0.108662733	yes	down	1.32	1.6	0.57	1.44	0.21	0	0.84	0	1.2325	0.2625
ENSG00000203797	DDO	D-aspartate oxidase [Source:HGNC Symbol;Acc:HGNC:2727]	0.325630214	-1.618693527	0.010721639	0.108674606	yes	down	0.21	0.37	0.25	0.21	0.17	0.03	0.07	0.07	0.26	0.085
ENSG00000106366	SERPINE1	serpin family E member 1 [Source:HGNC Symbol;Acc:HGNC:8583]	0.280725537	-1.832767786	0.010746367	0.108870676	yes	down	0.19	0.17	0.04	0.16	0.04	0	0.06	0.04	0.14	0.035
ENSG00000261061		novel transcript	1.680069002	0.748520487	0.010780604	0.109108207	yes	up	2.38	3.55	1.46	1.91	3.12	4.04	4.59	3.43	2.325	3.795
ENSG00000249961	TERB1	telomere repeat binding bouquet formation protein 1 [Source:HGNC Symbol;Acc:HGNC:26675]	15.16368617	3.922548599	0.010791304	0.109198277	yes	up	0	0	0	0	0.76	0.05	0	0	0	0.2025
ENSG00000173762	CD7	CD7 molecule [Source:HGNC Symbol;Acc:HGNC:1695]	0.313240127	-1.674659059	0.010932744	0.110463688	yes	down	0.12	0.73	0.51	0.33	0.31	0	0.08	0.12	0.4225	0.1275
ENSG00000277277	FAM243B	family with sequence similarity 243 member B [Source:HGNC Symbol;Acc:HGNC:53888]	1.872524348	0.904984478	0.010961534	0.110699265	yes	up	0.36	0.62	0.46	0.32	0.81	0.74	1.03	0.68	0.44	0.815
ENSG00000268902	CSAG2	CSAG family member 2 [Source:HGNC Symbol;Acc:HGNC:16847]	0.554313774	-0.851225237	0.01100782	0.111111216	yes	down	1.02	2.61	2.44	2.04	1.08	0.57	0.61	2.53	2.0275	1.1975
ENSG00000165507	DEPP1	DEPP1 autophagy regulator [Source:HGNC Symbol;Acc:HGNC:23355]	0.381757442	-1.389271812	0.011138674	0.112263916	yes	down	0.48	0.34	0.36	0.12	0.03	0.1	0.13	0.23	0.325	0.1225
ENSG00000267801		novel transcript, antisense to TRIM47	0.361008017	-1.469897218	0.011144259	0.11230155	yes	down	0.18	0.25	0.16	0.18	0.02	0.1	0.02	0.13	0.1925	0.0675
ENSG00000170412	GPRC5C	G protein-coupled receptor class C group 5 member C [Source:HGNC Symbol;Acc:HGNC:13309]	0.557650931	-0.842565764	0.011204113	0.112829731	yes	down	1.02	1.15	0.77	0.9	0.42	0.77	0.36	0.45	0.96	0.5
ENSG00000147059	SPIN2A	spindlin family member 2A [Source:HGNC Symbol;Acc:HGNC:20694]	1.972597701	0.980096757	0.011343683	0.114121589	yes	up	0.16	0.21	0.19	0.59	0.73	0.35	1.21	0.52	0.2875	0.7025
ENSG00000251410		novel transcript	0.533114816	-0.907481819	0.011344186	0.114107731	yes	down	0.58	0.25	0.24	0.4	0.25	0.21	0.14	0.17	0.3675	0.1925
ENSG00000232949		novel transcript, antisense to STEAP1B	2.358633193	1.237951073	0.011417557	0.114674615	yes	up	0.56	0.2	0.76	0.15	1.65	1.82	0.77	0.48	0.4175	1.18
ENSG00000131781	FMO5	flavin containing dimethylaniline monoxygenase 5 [Source:HGNC Symbol;Acc:HGNC:3773]	0.28377685	-1.817171194	0.011442339	0.114885478	yes	down	0.21	0.23	0.4	0.16	0.06	0	0.12	0.03	0.25	0.0525
ENSG00000250273	PSMC1P5	proteasome 26S subunit, ATPase 1 pseudogene 5 [Source:HGNC Symbol;Acc:HGNC:39780]	0.065388763	-3.93481346	0.011493735	0.115267964	yes	down	0.44	32.67	0	28.57	0	0	0	0	15.42	0
ENSG00000272887	CSPG4P5	chondroitin sulfate proteoglycan 4 pseudogene 5 [Source:HGNC Symbol;Acc:HGNC:29403]	1.820390331	0.864247828	0.011637527	0.116498178	yes	up	0.21	0	0.27	0.31	0.25	0.13	0.33	0.74	0.1975	0.3625
ENSG00000277998		eukaryotic translation initiation factor 3, subunit E (EIF3E) pseudogene	0.453475711	-1.140902814	0.01168286	0.116894115	yes	down	10.09	15.24	3.99	17.47	8.5	7.15	5.15	0	11.6975	5.2
ENSG00000167740	CYB5D2	cytochrome b5 domain containing 2 [Source:HGNC Symbol;Acc:HGNC:28471]	1.511163049	0.595659331	0.01170723	0.117099328	yes	up	0.96	2.02	1.68	1.59	1.59	2.1	2.46	1.87	1.5625	2.005
ENSG00000237624	OXCT2P1	3-oxoacid CoA-transferase 2 pseudogene 1 [Source:HGNC Symbol;Acc:HGNC:21627]	2.245981745	1.167346202	0.011791186	0.117803112	yes	up	0.3	0.12	0.18	0.48	0.6	0.21	1.19	0.43	0.27	0.6075
ENSG00000204176	SYT15	synaptotagmin 15 [Source:HGNC Symbol;Acc:HGNC:17167]	1.556840392	0.638621046	0.011844333	0.11827566	yes	up	0.13	0.41	0.33	0.17	0.46	0.31	0.38	0.44	0.26	0.3975
ENSG00000233830	EIF4HP1	eukaryotic translation initiation factor 4H pseudogene 1 [Source:HGNC Symbol;Acc:HGNC:49035]	0.319760905	-1.644934535	0.011858691	0.118399549	yes	down	0.29	0.09	0.34	0.34	0.05	0.27	0	0	0.265	0.08
ENSG00000128165	ADM2	adrenomedullin 2 [Source:HGNC Symbol;Acc:HGNC:28898]	0.658142853	-0.603527334	0.011865118	0.118424731	yes	down	0.68	0.6	0.67	0.5	0.34	0.42	0.51	0.33	0.6125	0.4
ENSG00000251458		novel transcript	0.521746371	-0.938579433	0.011899962	0.11871391	yes	down	2.76	1.88	1.42	2.56	1.79	1.05	0.45	1.06	2.155	1.0875
ENSG00000274712		bromodomain PHD finger transcription factor (BPTF) pseudogene	0.63577171	-0.653419273	0.01192493	0.118904336	yes	down	1.31	1.31	1.23	1.04	0.65	0.68	0.8	0.92	1.2225	0.7625
ENSG00000106624	AEBP1	AE binding protein 1 [Source:HGNC Symbol;Acc:HGNC:303]	0.626784054	-0.673959619	0.011931862	0.118953895	yes	down	0.51	1.12	0.72	1.08	0.5	0.82	0.43	0.4	0.8575	0.5375
ENSG00000273192		novel transcript, antisense to ALG12	1.697687903	0.763571264	0.011980678	0.119342509	yes	up	0.51	0.33	0.41	0.57	1.07	0.46	0.86	0.65	0.455	0.76
ENSG00000205090	TMEM240	transmembrane protein 240 [Source:HGNC Symbol;Acc:HGNC:25186]	2.387965249	1.255781842	0.012046112	0.119856539	yes	up	0.45	0.49	0.78	0.42	1.2	1.06	1.58	1.14	0.535	1.245
ENSG00000248810	LINC02432	long intergenic non-protein coding RNA 2432 [Source:HGNC Symbol;Acc:HGNC:53363]	0.41051452	-1.284494843	0.012082996	0.120164409	yes	down	0.89	0.88	0.82	0.64	0.56	0.21	0.26	0.17	0.8075	0.3
ENSG00000229980	TOB1-AS1	TOB1 antisense RNA 1 [Source:HGNC Symbol;Acc:HGNC:44340]	0.563297665	-0.828030605	0.012095149	0.120226137	yes	down	1.82	1.36	2.55	1.33	1.37	0.46	0.77	1.03	1.765	0.9075
ENSG00000179698	WDR97	WD repeat domain 97 [Source:HGNC Symbol;Acc:HGNC:26959]	1.616553867	0.692921582	0.012111394	0.120328462	yes	up	0.57	0.19	0.23	0.35	0.44	0.55	0.39	0.73	0.335	0.5275
ENSG00000242797	GLYCTK-AS1	GLYCTK antisense RNA 1 [Source:HGNC Symbol;Acc:HGNC:41043]	0.245959742	-2.023505897	0.012174251	0.120893563	yes	down	0.83	1.31	0.71	0.26	0.39	0	0.13	0.14	0.7775	0.165
ENSG00000287193		novel transcript	0.066464395	-3.911274486	0.012331414	0.122334077	yes	down	0.06	0.3	0.05	0	0	0	0	0	0.1025	0
ENSG00000248215	LINC02505	long intergenic non-protein coding RNA 2505 [Source:HGNC Symbol;Acc:HGNC:53494]	0.603188224	-0.729319832	0.012343115	0.122430139	yes	down	1.75	3	1.85	2.05	1.22	1.19	1.85	1.19	2.1625	1.3625
ENSG00000285926		Novel transcript, antisense to NUPL2	14.56462389	3.864396541	0.012397088	0.122844977	yes	up	0	0	0	0	0.56	0	0	0	0	0.14
ENSG00000134986	NREP	neuronal regeneration related protein [Source:HGNC Symbol;Acc:HGNC:16834]	2.64707204	1.404397458	0.012400606	0.122859767	yes	up	0.3	0.1	0.15	0.08	0.31	1.02	0.17	1.07	0.1575	0.6425
ENSG00000273024	INTS4P2	integrator complex subunit 4 pseudogene 2 [Source:HGNC Symbol;Acc:HGNC:22351]	0.067695848	-3.884788845	0.012402283	0.122856316	yes	down	0	0	0.14	0.08	0	0	0	0	0.055	0
ENSG00000282961	PRNCR1	prostate cancer associated non-coding RNA 1 [Source:HGNC Symbol;Acc:HGNC:48942]	2.863979565	1.518021199	0.012442006	0.123229694	yes	up	0.01	0.01	0.03	0.02	0.03	0.04	0.02	0.07	0.0175	0.04
ENSG00000156711	MAPK13	mitogen-activated protein kinase 13 [Source:HGNC Symbol;Acc:HGNC:6875]	1.537975767	0.621032772	0.01250415	0.123744172	yes	up	0.19	0.29	0.4	0.36	0.29	0.55	0.54	0.39	0.31	0.4425
ENSG00000287110		novel transcript	2.464843206	1.301495876	0.012554967	0.124206546	yes	up	0.02	0.15	0.13	0.12	0.35	0.19	0.19	0.3	0.105	0.2575
ENSG00000261613		novel transcript, antisense to PDPK1	4.21629838	2.075976967	0.012615466	0.12466275	yes	up	0	0	0	0.15	0	0.25	0.15	0.29	0.0375	0.1725
ENSG00000278249	SCARNA2	small Cajal body-specific RNA 2 [Source:HGNC Symbol;Acc:HGNC:32558]	0.199012775	-2.329067053	0.012629242	0.124778555	yes	down	0.74	1.54	0.95	3.1	0	0	0	1.07	1.5825	0.2675
ENSG00000170909	OSCAR	osteoclast associated Ig-like receptor [Source:HGNC Symbol;Acc:HGNC:29960]	0.199061097	-2.328716794	0.012646677	0.124910127	yes	down	0.04	0.24	0.46	0.15	0.16	0.16	0	0	0.2225	0.08
ENSG00000128242	GAL3ST1	galactose-3-O-sulfotransferase 1 [Source:HGNC Symbol;Acc:HGNC:24240]	0.429304488	-1.219926841	0.012775668	0.125999534	yes	down	0.45	0.41	0.79	1.12	0.35	0.13	0.3	0.24	0.6925	0.255
ENSG00000105122	RASAL3	RAS protein activator like 3 [Source:HGNC Symbol;Acc:HGNC:26129]	0.067928161	-3.879846382	0.012986522	0.127891948	yes	down	0.2	0	0.01	0.03	0	0	0	0	0.06	0
ENSG00000260891		novel transcript, intronic to NFATC3	0.067928161	-3.879846382	0.012986522	0.127891948	yes	down	1.2	0	0.26	0.56	0	0	0	0	0.505	0
ENSG00000258919		novel transcript	0.068020394	-3.877888831	0.013030908	0.128266588	yes	down	0.65	0.22	0.37	0.2	0	0	0	0	0.36	0
ENSG00000215871		novel pseudogene	0.290557018	-1.783106796	0.013094835	0.128791351	yes	down	1.76	2.42	5.92	4.33	0	0	2.75	0.67	3.6075	0.855
ENSG00000184956	MUC6	mucin 6, oligomeric mucus/gel-forming [Source:HGNC Symbol;Acc:HGNC:7517]	4.477312928	2.162633155	0.013100358	0.12882479	yes	up	0.03	0	0	0	0.04	0.02	0.05	0.03	0.0075	0.035
ENSG00000198417	MT1F	metallothionein 1F [Source:HGNC Symbol;Acc:HGNC:7398]	0.068262329	-3.872766554	0.013144409	0.129174212	yes	down	0	1.12	0.92	0.04	0	0	0	0	0.52	0
ENSG00000188032	C19orf67	chromosome 19 open reading frame 67 [Source:HGNC Symbol;Acc:HGNC:34354]	0.068338986	-3.871147338	0.013176028	0.129443008	yes	down	0.3	0.16	0.24	0.28	0	0	0	0	0.245	0
ENSG00000276015			13.64611118	3.770417971	0.013211172	0.129704245	yes	up	0	0	0	0.2	0	9.87	8.62	3.86	0.05	5.5875
ENSG00000197415	VEPH1	ventricular zone expressed PH domain containing 1 [Source:HGNC Symbol;Acc:HGNC:25735]	0.068508591	-3.867571274	0.013252628	0.130048111	yes	down	0.4	0	0.25	0.2	0	0	0	0	0.2125	0
ENSG00000006047	YBX2	Y-box binding protein 2 [Source:HGNC Symbol;Acc:HGNC:17948]	0.068508591	-3.867571274	0.013252628	0.130048111	yes	down	0.04	0	0.02	0.06	0	0	0	0	0.03	0
ENSG00000240180	RPL12P28	ribosomal protein L12 pseudogene 28 [Source:HGNC Symbol;Acc:HGNC:36818]	0.068810206	-3.861233632	0.013287465	0.130263536	yes	down	0	0.52	1.15	0	0	0	0	0	0.4175	0
ENSG00000159164	SV2A	synaptic vesicle glycoprotein 2A [Source:HGNC Symbol;Acc:HGNC:20566]	0.34640356	-1.529474339	0.013329796	0.130657412	yes	down	0.1	0.14	0.11	0.15	0.08	0.04	0.01	0.01	0.125	0.035
ENSG00000137393	RNF144B	ring finger protein 144B [Source:HGNC Symbol;Acc:HGNC:21578]	0.068771838	-3.862038283	0.013374779	0.131013658	yes	down	0.04	0	0.03	0.01	0	0	0	0	0.02	0
ENSG00000272375		novel transcript	0.068829179	-3.860835897	0.013399442	0.131212871	yes	down	0.31	0	0.27	0.44	0	0	0	0	0.255	0
ENSG00000153064	BANK1	B cell scaffold protein with ankyrin repeats 1 [Source:HGNC Symbol;Acc:HGNC:18233]	0.068865285	-3.860079292	0.013420152	0.131394462	yes	down	0.27	0.02	0.11	0	0	0	0	0	0.1	0
ENSG00000236514		novel transcript	0.266999343	-1.905091904	0.013492744	0.132019968	yes	down	0.32	0.88	0.18	1.11	0.13	0.16	0.1	0.21	0.6225	0.15
ENSG00000178809	TRIM73	tripartite motif containing 73 [Source:HGNC Symbol;Acc:HGNC:18162]	2.247355935	1.168228636	0.013503694	0.132105803	yes	up	0.09	0.02	0.35	0.07	1.11	0.29	0.42	1.47	0.1325	0.8225
ENSG00000230992	FAM201B	family with sequence similarity 201 member B [Source:HGNC Symbol;Acc:HGNC:27933]	3.771126824	1.914995669	0.013517465	0.13217658	yes	up	0.36	0.37	0.31	0	0.68	1.26	1.2	0.89	0.26	1.0075
ENSG00000171658	NMRAL2P	NmrA like redox sensor 2, pseudogene [Source:HGNC Symbol;Acc:HGNC:52332]	0.165023516	-2.599256472	0.013564892	0.132512177	yes	down	0.35	0.24	0.09	0.36	0	0.23	0	0	0.26	0.0575
ENSG00000276449		novel transcript	14.29792911	3.837734299	0.013589654	0.132689969	yes	up	0	0	0	0	0	0	0	0.13	0	0.0325
ENSG00000226624		ribosomal protein L13a (RPL13A) pseudogene	0.069382149	-3.849291653	0.013635143	0.133091281	yes	down	0	0	0.3	0.81	0	0	0	0	0.2775	0
ENSG00000205744	DENND1C	DENN domain containing 1C [Source:HGNC Symbol;Acc:HGNC:26225]	0.595721685	-0.747289619	0.01365533	0.133224014	yes	down	0.89	0.83	0.97	1.46	0.51	0.43	0.41	0.48	1.0375	0.4575
ENSG00000280043		tec	1.742114277	0.800839263	0.013666577	0.133312308	yes	up	0.51	0.58	0.76	0.35	1.3	0.5	0.73	1.27	0.55	0.95
ENSG00000234350		novel transcript (FLJ13453)	0.618701011	-0.692685703	0.013677897	0.133379832	yes	down	2.9	1.51	1.58	30.14	1.53	1.33	1.45	0.9	9.0325	1.3025
ENSG00000180871	CXCR2	C-X-C motif chemokine receptor 2 [Source:HGNC Symbol;Acc:HGNC:6027]	0.069453159	-3.847815875	0.01369249	0.133500677	yes	down	0.02	0.02	0.72	0	0	0	0	0	0.19	0
ENSG00000284948		novel transcript	0.069474298	-3.847376829	0.013696422	0.133517553	yes	down	0	0	0.11	0.29	0	0	0	0	0.1	0
ENSG00000188385	JAKMIP3	Janus kinase and microtubule interacting protein 3 [Source:HGNC Symbol;Acc:HGNC:23523]	0.123206243	-3.020852737	0.013705489	0.133563014	yes	down	0.03	0.14	0.02	0.05	0.01	0	0	0	0.06	0.0025
ENSG00000286412		novel transcript, antisense to NRXN1	3.155359004	1.657804159	0.013799578	0.134415154	yes	up	0.15	0.06	0.08	0.04	0.39	0.26	0.07	0.33	0.0825	0.2625
ENSG00000131409	LRRC4B	leucine rich repeat containing 4B [Source:HGNC Symbol;Acc:HGNC:25042]	0.348226239	-1.521903179	0.013800383	0.134401421	yes	down	0.07	0.29	0.37	0.15	0.06	0.04	0.07	0.07	0.22	0.06
ENSG00000163637	PRICKLE2	prickle planar cell polarity protein 2 [Source:HGNC Symbol;Acc:HGNC:20340]	0.069740914	-3.841850911	0.013821413	0.134584623	yes	down	0	0	0.05	0.06	0	0	0	0	0.0275	0
ENSG00000232775	BMS1P22	BMS1 pseudogene 22 [Source:HGNC Symbol;Acc:HGNC:51603]	0.652101461	-0.616831643	0.013836288	0.134643015	yes	down	5.51	2.27	2.56	2.25	2.73	1.89	1.38	1.1	3.1475	1.775
ENSG00000288520		novel protein	3.317095701	1.729920636	0.013874946	0.134975901	yes	up	0	0.2	0	0	0	0.35	0.15	0.16	0.05	0.165
ENSG00000285269		novel transcript, SLC35D2-HSD17B3 readthrough	0.221052654	-2.177538038	0.013908908	0.135262902	yes	down	0	0.1	0.25	0	0	0.07	0	0	0.0875	0.0175
ENSG00000164604	GPR85	G protein-coupled receptor 85 [Source:HGNC Symbol;Acc:HGNC:4536]	0.601500978	-0.733361013	0.013911671	0.135268086	yes	down	1.02	0.81	0.44	0.55	0.39	0.2	0.21	0.55	0.705	0.3375
ENSG00000174429	ABRA	actin binding Rho activating protein [Source:HGNC Symbol;Acc:HGNC:30655]	0.069950437	-3.837523111	0.013921912	0.135302603	yes	down	0.02	0	0.1	0.02	0	0	0	0	0.035	0
ENSG00000279641		TEC	0.069681132	-3.843088138	0.013941387	0.135448475	yes	down	0	0	0	0.29	0	0	0	0	0.0725	0
ENSG00000215032	GNL3LP1	G protein nucleolar 3 like pseudogene 1 [Source:HGNC Symbol;Acc:HGNC:25733]	5.198684273	2.37814654	0.014035235	0.136272965	yes	up	0	0	0.1	0.01	0.3	0.02	0.2	0.16	0.0275	0.17
ENSG00000223881		novel transcript	0.070218803	-3.831998796	0.014048365	0.136334991	yes	down	0.54	0	2.76	0	0	0	0	0	0.825	0
ENSG00000270031		novel transcript, sense intronic to STX12	0.070277015	-3.830803282	0.014073807	0.136538206	yes	down	0	0	2.37	1.04	0	0	0	0	0.8525	0
ENSG00000269621		novel transcript, antisense to MRPL9	0.069946723	-3.837599721	0.01409092	0.136682372	yes	down	0.38	0	0.48	0.18	0	0	0	0	0.26	0
ENSG00000258457		novel transcript, antisense to C14orf93	0.12429518	-3.008157745	0.014104236	0.1367678	yes	down	0.44	0.19	0	0.73	0	0.11	0	0	0.34	0.0275
ENSG00000276840	PMS2P10	PMS1 homolog 2, mismatch repair system component pseudogene 10 [Source:HGNC Symbol;Acc:HGNC:9124]	3.591603029	1.844627902	0.014141967	0.137046054	yes	up	0.81	0	0.29	0	1.91	0	0.91	1.3	0.275	1.03
ENSG00000213279		novel transcript	2.740267475	1.45431672	0.014146653	0.137047681	yes	up	0.14	0.06	0.05	0.11	0.16	0.17	0.47	0.17	0.09	0.2425
ENSG00000248431		novel transcript	0.307940111	-1.699278294	0.014154273	0.137077713	yes	down	0.95	0.33	0.22	0.54	0.35	0.08	0.16	0.08	0.51	0.1675
ENSG00000257181		novel transcript	1.895857097	0.922850223	0.014196354	0.137419437	yes	up	0.9	1.33	2.05	0	2.73	0	0	5.36	1.07	2.0225
ENSG00000248717	LINC02222	long intergenic non-protein coding RNA 2222 [Source:HGNC Symbol;Acc:HGNC:53091]	0.492827786	-1.020844497	0.014251479	0.137931038	yes	down	1.31	1.61	1.14	0.73	0.44	0.53	0.53	0.78	1.1975	0.57
ENSG00000172086	KRCC1	lysine rich coiled-coil 1 [Source:HGNC Symbol;Acc:HGNC:28039]	1.862442493	0.89719588	0.014253496	0.137928554	yes	up	0.27	0.48	0.44	0.37	0.56	0.76	0.99	0.6	0.39	0.7275
ENSG00000250016	SNX18P23	sorting nexin 18 pseudogene 23 [Source:HGNC Symbol;Acc:HGNC:39631]	2.533837347	1.341323918	0.014397936	0.139148702	yes	up	0.36	0.82	0.38	0.68	1.92	1.51	1.24	0.91	0.56	1.395
ENSG00000219738	CD83P1	CD83 molecule pseudogene 1 [Source:HGNC Symbol;Acc:HGNC:13946]	0.526737926	-0.924842756	0.014519404	0.14016632	yes	down	10.21	7.92	10.95	15.29	7.2	6.77	4.19	4.83	11.0925	5.7475
ENSG00000254783		immunoglobin superfamily, member 21 (IGSF21) pseudogene	3.301042175	1.722921571	0.014521988	0.140146658	yes	up	0.25	0.13	0.32	0.23	0.24	1	0.6	1.38	0.2325	0.805
ENSG00000272795	GAR1-DT	GAR1 divergent transcript [Source:HGNC Symbol;Acc:HGNC:55191]	0.252963611	-1.982998229	0.01453674	0.140222097	yes	down	2.7	4.48	2.28	2	0.51	0.57	1.02	0.51	2.865	0.6525
ENSG00000268107		novel transcript	7.024159577	2.812325621	0.01456312	0.1404319	yes	up	0	0	0	0.04	0.11	0.04	0.07	0.17	0.01	0.0975
ENSG00000231683		novel transcript	0.070871176	-3.818657211	0.014570058	0.140476477	yes	down	0	0.02	0.09	0.02	0	0	0	0	0.0325	0
ENSG00000259562		zinc finger CCHC-type and RNA binding motif 1 (ZCRB1) pseudogene	0.224851467	-2.152955797	0.014647862	0.141114486	yes	down	0.26	1	1.24	0	0.07	0.2	0.24	0	0.625	0.1275
ENSG00000165568	AKR1E2	aldo-keto reductase family 1 member E2 [Source:HGNC Symbol;Acc:HGNC:23437]	0.663121134	-0.592655659	0.014695835	0.141509228	yes	down	2.8	2.81	1.85	2.79	2.16	1.3	1.81	1.77	2.5625	1.76
ENSG00000237686	SCIRT	stem cell inhibitory RNA transcript [Source:HGNC Symbol;Acc:HGNC:55341]	0.339299798	-1.559367522	0.014699786	0.141524806	yes	down	2.03	1.27	1.75	1.14	0.19	0.82	0.31	0.15	1.5475	0.3675
ENSG00000255153	TOLLIP-AS1	TOLLIP antisense RNA 1 (head to head) [Source:HGNC Symbol;Acc:HGNC:27403]	0.293074725	-1.770659542	0.014773154	0.142118402	yes	down	0.27	1.01	0.46	0.5	0.25	0.09	0.09	0.18	0.56	0.1525
ENSG00000162944	RFTN2	raftlin family member 2 [Source:HGNC Symbol;Acc:HGNC:26402]	2.703565978	1.434863565	0.014998795	0.143992228	yes	up	0.2	0.04	0.02	0.07	0.02	0.17	0.06	0.17	0.0825	0.105
ENSG00000283697	HSFX3	heat shock transcription factor family, X-linked member 3 [Source:HGNC Symbol;Acc:HGNC:52395]	13.85281872	3.792107655	0.015023242	0.144181294	yes	up	0	0	0	0	0	0	0.12	0.26	0	0.095
ENSG00000253154		novel transcript	0.392331545	-1.349854758	0.015032105	0.144243533	yes	down	1.94	2.06	0.64	0.68	0.5	0.24	0.03	0.94	1.33	0.4275
ENSG00000160471	COX6B2	cytochrome c oxidase subunit 6B2 [Source:HGNC Symbol;Acc:HGNC:24380]	0.404843305	-1.304564476	0.015198079	0.145767001	yes	down	0.51	0.6	0.33	1.01	0.1	0.18	0.28	0.14	0.6125	0.175
ENSG00000149646	CNBD2	cyclic nucleotide binding domain containing 2 [Source:HGNC Symbol;Acc:HGNC:16145]	0.636460119	-0.651857979	0.015319347	0.146744493	yes	down	3.78	4.75	4.21	5.39	1.73	3.77	2.63	2.65	4.5325	2.695
ENSG00000280269		TEC	0.520358848	-0.942421221	0.01533834	0.146880037	yes	down	1.75	1.72	1.6	1.55	0.46	0.87	1.04	0.98	1.655	0.8375
ENSG00000228509		novel transcript, antisense to NAB1	0.483035653	-1.049798416	0.015352947	0.14699671	yes	down	0.42	0.69	0.85	0.46	0.33	0.89	0.31	0.24	0.605	0.4425
ENSG00000230071	RPL4P6	ribosomal protein L4 pseudogene 6 [Source:HGNC Symbol;Acc:HGNC:35611]	0.256542333	-1.962731187	0.01557642	0.148807547	yes	down	0.23	0.24	0.4	0.33	0.17	0	0.11	0	0.3	0.07
ENSG00000174950	CD164L2	CD164 molecule like 2 [Source:HGNC Symbol;Acc:HGNC:32043]	0.171156641	-2.546610827	0.015596572	0.148929706	yes	down	0.09	0.1	0.41	0.32	0.08	0	0	0.05	0.23	0.0325
ENSG00000233651		novel transcript	0.071912657	-3.797610472	0.015654593	0.149413191	yes	down	0	0.03	0	0.09	0	0	0	0	0.03	0
ENSG00000151491	EPS8	epidermal growth factor receptor pathway substrate 8 [Source:HGNC Symbol;Acc:HGNC:3420]	0.577136422	-0.793015716	0.015815787	0.150785617	yes	down	0.38	0.91	0.53	0.3	0.27	0.4	0.47	0.12	0.53	0.315
ENSG00000280649		TEC	0.532759179	-0.908444551	0.015898299	0.151477058	yes	down	1.15	1.65	1.04	1.59	0.66	0.75	0.48	0.91	1.3575	0.7
ENSG00000279259		TEC	0.526054796	-0.926715012	0.015905343	0.151520372	yes	down	0.77	1.21	0.86	0.99	0.64	0.44	0.49	0.39	0.9575	0.49
ENSG00000280038	DNM1P41	dynamin 1 pseudogene 41 [Source:HGNC Symbol;Acc:HGNC:35191]	1.538946441	0.621943023	0.015910907	0.151549575	yes	up	0.36	0.39	0.6	0.42	0.69	0.74	0.53	0.75	0.4425	0.6775
ENSG00000265188		transforming, acidic coiled-coil containing protein (TACC3) pseudogene	0.071846466	-3.798938998	0.015933212	0.151714388	yes	down	0.6	0	0	0	0	0	0	0	0.15	0
ENSG00000124766	SOX4	SRY-box transcription factor 4 [Source:HGNC Symbol;Acc:HGNC:11200]	0.58461051	-0.774452329	0.016039586	0.152655391	yes	down	0.22	0.31	0.34	0.36	0.24	0.19	0.2	0.07	0.3075	0.175
ENSG00000255126		novel transcript	0.072158486	-3.792687112	0.016090218	0.153065232	yes	down	1.02	0	0	0.15	0	0	0	0	0.2925	0
ENSG00000188223		novel protein	4.22828632	2.080073073	0.016113749	0.153241019	yes	up	0	0.34	0	0	0.77	0.36	0	0.3	0.085	0.3575
ENSG00000226143		novel transcript	0.072926725	-3.777408592	0.016137548	0.153443295	yes	down	0.08	0	0.32	1.02	0	0	0	0	0.355	0
ENSG00000228288	PCAT6	prostate cancer associated transcript 6 [Source:HGNC Symbol;Acc:HGNC:43714]	0.503890943	-0.988816569	0.016188709	0.153809214	yes	down	2.74	1.73	1.92	1.99	0.77	0.42	1.67	1.63	2.095	1.1225
ENSG00000253645		novel transcript	0.421005762	-1.248088115	0.016197407	0.153867757	yes	down	1.67	2.52	1.25	1.24	0	0.82	0.87	1.02	1.67	0.6775
ENSG00000182521	TBPL2	TATA-box binding protein like 2 [Source:HGNC Symbol;Acc:HGNC:19841]	0.07308564	-3.774268216	0.016334576	0.155097935	yes	down	0.2	0.21	0.53	0.28	0	0	0	0	0.305	0
ENSG00000256632		novel transcript	13.42151442	3.746475562	0.016403879	0.155682873	yes	up	0	0	0	0	0.61	0.24	0.31	0	0	0.29
ENSG00000248213	CICP16	capicua transcriptional repressor pseudogene 16 [Source:HGNC Symbol;Acc:HGNC:38550]	2.023425556	1.016799771	0.016451387	0.155987326	yes	up	0.11	0.18	0.19	0.2	0.18	0.26	0.51	0.44	0.17	0.3475
ENSG00000272825		novel transcript	4.927735632	2.300924859	0.016499701	0.156372104	yes	up	0.31	0	0	0.14	0.44	0.31	0.44	1.23	0.1125	0.605
ENSG00000148225	WDR31	WD repeat domain 31 [Source:HGNC Symbol;Acc:HGNC:21421]	1.548409786	0.630787331	0.016509384	0.156439441	yes	up	0.29	0.49	0.44	0.37	0.57	0.63	0.58	0.63	0.3975	0.6025
ENSG00000258951	KRT18P7	keratin 18 pseudogene 7 [Source:HGNC Symbol;Acc:HGNC:20283]	13.42786977	3.747158545	0.016669384	0.15768463	yes	up	0	0	0	0	0	0	0.06	0.32	0	0.095
ENSG00000272921		novel protein	13.39401002	3.743516048	0.016683306	0.157767122	yes	up	0	0	0	0	0	0.65	0	0	0	0.1625
ENSG00000273702		novel transcript	0.563311052	-0.827996318	0.016689003	0.1577964	yes	down	2.13	0.83	1.62	0.88	1.28	0.4	0.45	0.88	1.365	0.7525
ENSG00000144152	FBLN7	fibulin 7 [Source:HGNC Symbol;Acc:HGNC:26740]	13.39409032	3.743524697	0.016762192	0.15834033	yes	up	0	0	0	0	0	0	0.06	0.13	0	0.0475
ENSG00000241907	RPS20P4	ribosomal protein S20 pseudogene 4 [Source:HGNC Symbol;Acc:HGNC:10407]	13.36095043	3.739950732	0.016854095	0.159134135	yes	up	0	0	0	0	0.55	1.23	0	1.65	0	0.8575
ENSG00000224769	MUC20P1	mucin 20, cell surface associated pseudogene 1 [Source:HGNC Symbol;Acc:HGNC:51921]	13.34883921	3.738642388	0.016887814	0.15940289	yes	up	0	0	0	0	0.04	0.04	0.04	0.13	0	0.0625
ENSG00000180447	GAS1	growth arrest specific 1 [Source:HGNC Symbol;Acc:HGNC:4165]	13.34666131	3.73840699	0.016894375	0.159440006	yes	up	0	0	0	0	0.04	0	0	0.09	0	0.0325
ENSG00000249412		novel transcript	13.3394558	3.737627906	0.01691377	0.159573397	yes	up	0	0	0	0	0.18	0.59	0	0.39	0	0.29
ENSG00000276757	RN7SL192P	RNA, 7SL, cytoplasmic 192, pseudogene [Source:HGNC Symbol;Acc:HGNC:46208]	13.3394558	3.737627906	0.01691377	0.159573397	yes	up	0	0	0	0	0.95	3.29	0	1.87	0	1.5275
ENSG00000257246	PHBP19	prohibitin pseudogene 19 [Source:HGNC Symbol;Acc:HGNC:51552]	13.31142816	3.734593459	0.016939492	0.159766374	yes	up	0	0	0	0	0.23	0.25	0.12	0.12	0	0.18
ENSG00000099617	EFNA2	ephrin A2 [Source:HGNC Symbol;Acc:HGNC:3222]	13.32519288	3.73608451	0.016954144	0.159879709	yes	up	0	0	0	0	0.05	0.03	0	0.09	0	0.0425
ENSG00000139044	B4GALNT3	beta-1,4-N-acetyl-galactosaminyltransferase 3 [Source:HGNC Symbol;Acc:HGNC:24137]	13.32519288	3.73608451	0.016954144	0.159879709	yes	up	0	0	0	0	0.24	0.01	0	0.04	0	0.0725
ENSG00000261243		novel transcript, antisense to KIAA1609	13.31746459	3.73524754	0.016974823	0.160000101	yes	up	0	0	0	0	0	0.36	0.52	0.18	0	0.265
ENSG00000272606	PPP4R3B-DT	PPP4R3B divergent transcript [Source:HGNC Symbol;Acc:HGNC:55209]	0.637035984	-0.650553228	0.017007189	0.160280271	yes	down	9.6	10.82	7.57	9.84	4.48	6.38	9.04	3.47	9.4575	5.8425
ENSG00000262877		novel transcript	1.533267592	0.616609504	0.017008279	0.160265645	yes	up	1.52	1.15	1.11	0.86	2.08	1.92	1.49	1.79	1.16	1.82
ENSG00000240859		novel transcript	13.29658894	3.732984284	0.017033527	0.160478629	yes	up	0	0	0	0	0.03	0.07	0	0	0	0.025
ENSG00000261889		novel transcript	0.551489923	-0.858593571	0.017047719	0.160562459	yes	down	2.09	3.2	1.81	2.43	0.82	1.6	0.96	1.74	2.3825	1.28
ENSG00000164841	TMEM74	transmembrane protein 74 [Source:HGNC Symbol;Acc:HGNC:26409]	13.28454608	3.731677029	0.017067478	0.160648795	yes	up	0	0	0	0	0.01	0.04	0.01	0	0	0.015
ENSG00000131152		novel protein	0.224745521	-2.153635732	0.017075951	0.160703616	yes	down	0.7	0.89	0	0	0.3	0	0	0	0.3975	0.075
ENSG00000183734	ASCL2	achaete-scute family bHLH transcription factor 2 [Source:HGNC Symbol;Acc:HGNC:739]	0.558321178	-0.840832813	0.017114309	0.161039622	yes	down	0.83	1.43	1.11	0.55	0.28	0.39	0.48	1	0.98	0.5375
ENSG00000241597		ribosomal protein S9 (RPS9) pseudogene	13.2604985	3.729063106	0.017135511	0.161164128	yes	up	0	0	0	0	0.18	0.38	0.54	0	0	0.275
ENSG00000230561	CCDC192	coiled-coil domain containing 192 [Source:HGNC Symbol;Acc:HGNC:49566]	13.25833455	3.728827657	0.017142139	0.161201479	yes	up	0	0	0	0	0.28	0.15	0.23	0.15	0	0.2025
ENSG00000148584	A1CF	APOBEC1 complementation factor [Source:HGNC Symbol;Acc:HGNC:24086]	13.23271352	3.726037028	0.017215765	0.161718361	yes	up	0	0	0	0	0.03	0	0	0.09	0	0.03
ENSG00000168907	PLA2G4F	phospholipase A2 group IVF [Source:HGNC Symbol;Acc:HGNC:27396]	13.2228953	3.724966201	0.017243294	0.161876691	yes	up	0	0	0	0	0.03	0	0.02	0.01	0	0.015
ENSG00000267669		ribosomal protein, large, P0 pseudogene	13.21146024	3.723718029	0.017276263	0.162110941	yes	up	0	0	0	0	0.85	0.23	0	0.22	0	0.325
ENSG00000156959	LHFPL4	LHFPL tetraspan subfamily member 4 [Source:HGNC Symbol;Acc:HGNC:29568]	13.20166133	3.722647588	0.017303852	0.162319608	yes	up	0	0	0	0	0.04	0.01	0.03	0	0	0.02
ENSG00000262772	LINC01977	long intergenic non-protein coding RNA 1977 [Source:HGNC Symbol;Acc:HGNC:52804]	1.619241207	0.69531791	0.017354975	0.162773998	yes	up	0.4	0.53	0.36	0.56	0.89	0.76	0.6	0.69	0.4625	0.735
ENSG00000246366	LACTB2-AS1	LACTB2 antisense RNA 1 [Source:HGNC Symbol;Acc:HGNC:27841]	3.895038063	1.961637427	0.017371645	0.162905158	yes	up	0.11	0.26	0.1	0	0.36	0.67	0.44	0.12	0.1175	0.3975
ENSG00000154645	CHODL	chondrolectin [Source:HGNC Symbol;Acc:HGNC:17807]	13.16639825	3.718788836	0.017405623	0.163097728	yes	up	0	0	0	0	0.17	0	0.07	0	0	0.06
ENSG00000279128		novel transcript	13.16639825	3.718788836	0.017405623	0.163097728	yes	up	0	0	0	0	0.13	0	0.07	0	0	0.05
ENSG00000275936		novel transcript, antisense to PXN	13.16639825	3.718788836	0.017405623	0.163097728	yes	up	0	0	0	0	0.55	0	0.28	0	0	0.2075
ENSG00000114638	UPK1B	uroplakin 1B [Source:HGNC Symbol;Acc:HGNC:12578]	0.172859872	-2.532325099	0.017417943	0.163137581	yes	down	0.18	0.13	0.09	0.1	0.03	0.04	0	0	0.125	0.0175
ENSG00000267317		novel transcript, antisense to APC2	0.206638795	-2.274816956	0.01742767	0.163178298	yes	down	0	0.95	0.55	0	0	0	0	0.27	0.375	0.0675
ENSG00000173728	C1orf100	chromosome 1 open reading frame 100 [Source:HGNC Symbol;Acc:HGNC:30435]	0.47296086	-1.080207298	0.017515306	0.16382185	yes	down	0.58	1.36	1.59	0.81	1.7	0.21	0.74	0.31	1.085	0.74
ENSG00000258704	SRP54-AS1	SRP54 antisense RNA 1 (head to head) [Source:HGNC Symbol;Acc:HGNC:50643]	0.427887238	-1.224697446	0.01751765	0.163818516	yes	down	2.44	1.54	2.16	1.93	0.19	1.94	0.51	0.75	2.0175	0.8475
ENSG00000196862	RGPD4	RANBP2 like and GRIP domain containing 4 [Source:HGNC Symbol;Acc:HGNC:32417]	0.589296142	-0.762935274	0.017568872	0.164246884	yes	down	0.21	0.19	0.18	0.24	0.11	0.12	0.08	0.16	0.205	0.1175
ENSG00000184566		novel transcript, antisense to LMO2	2.928025951	1.54992834	0.017773375	0.165903062	yes	up	0.2	0.14	0.12	0.19	0.58	0.6	0.46	0.27	0.1625	0.4775
ENSG00000267165	CHMP1B-AS1	CHMP1B antisense RNA 1 [Source:HGNC Symbol;Acc:HGNC:52778]	13.14828128	3.716802321	0.017872586	0.16677781	yes	up	0	0	0	0	0	0	0	1.19	0	0.2975
ENSG00000261505		novel transcript, antisense to UBE2I	1.91257573	0.935516874	0.017915153	0.167149315	yes	up	0.28	0.18	0.22	0.07	0.44	0.46	0.28	0.27	0.1875	0.3625
ENSG00000177138	FAM9B	family with sequence similarity 9 member B [Source:HGNC Symbol;Acc:HGNC:18404]	3.37638075	1.755477604	0.017948634	0.167384463	yes	up	0.13	0.07	0.02	0	0.41	0.16	0.14	0.35	0.055	0.265
ENSG00000105717	PBX4	PBX homeobox 4 [Source:HGNC Symbol;Acc:HGNC:13403]	0.559762812	-0.837112452	0.017970938	0.167566701	yes	down	1.46	1.91	1.02	1.57	1.97	0.79	0.52	0.68	1.49	0.99
ENSG00000166033	HTRA1	HtrA serine peptidase 1 [Source:HGNC Symbol;Acc:HGNC:9476]	2.419987392	1.274999531	0.018013361	0.167884855	yes	up	0.31	0.15	0.24	0.16	0.71	0.55	0.44	0.31	0.215	0.5025
ENSG00000281991	TMEM265	transmembrane protein 265 [Source:HGNC Symbol;Acc:HGNC:51241]	0.075972681	-3.718375452	0.018031927	0.168006267	yes	down	0	0	0.24	0	0	0	0	0	0.06	0
ENSG00000206192	ANKRD20A9P	ankyrin repeat domain 20 family member A9, pseudogene [Source:HGNC Symbol;Acc:HGNC:42023]	2.651189521	1.406639805	0.018052271	0.168144169	yes	up	0.05	0.13	0.04	0.06	0.11	0.3	0.19	0.14	0.07	0.185
ENSG00000239556		uroplakin-like protein (UPLP) pseudogene	11.08816939	3.470949297	0.018063451	0.168196656	yes	up	0	0	0.02	0	0.29	0.15	0	0.39	0.005	0.2075
ENSG00000288531		novel transcript	2.274226491	1.18537594	0.018228847	0.169528557	yes	up	0.07	0.15	0.17	0.25	0.6	0.48	0.14	0.24	0.16	0.365
ENSG00000088836	SLC4A11	solute carrier family 4 member 11 [Source:HGNC Symbol;Acc:HGNC:16438]	0.508646302	-0.975265299	0.018250991	0.169656467	yes	down	0.27	0.71	0.21	0.4	0.04	0.22	0.28	0.13	0.3975	0.1675
ENSG00000265303		novel protein	0.286860798	-1.80157727	0.018271095	0.169791315	yes	down	0.99	0.99	2.52	0	0	0.2	0.91	0.1	1.125	0.3025
ENSG00000262560		novel protein	12.96798421	3.696882334	0.018271176	0.169766063	yes	up	0	0	0	0	0.13	0.04	0	0	0	0.0425
ENSG00000227477	STK4-AS1	STK4 antisense RNA 1 (head to head) [Source:HGNC Symbol;Acc:HGNC:43811]	2.653180482	1.407722818	0.01836722	0.170553959	yes	up	0.1	0.26	0.09	0.09	0.96	0.29	0.23	0.2	0.135	0.42
ENSG00000287392		novel transcript	0.563328606	-0.827951361	0.018389996	0.170713193	yes	down	1.39	1.08	1.64	1.12	0.82	0.5	0.62	0.96	1.3075	0.725
ENSG00000272115		novel transcript, antisense to SLC39A4	0.310621686	-1.686769542	0.018882631	0.174458719	yes	down	0.92	2.57	0.79	2.42	0.4	0.62	0.91	0	1.675	0.4825
ENSG00000229413		novel pseudogene	2.510152368	1.32777494	0.018920841	0.174785125	yes	up	0	3.13	0	7.35	1.56	6.58	9.78	8.06	2.62	6.495
ENSG00000244733		novel transcript	0.611878604	-0.708682644	0.018983815	0.175286784	yes	down	0.81	1.35	0.82	1.15	0.48	0.64	0.76	0.57	1.0325	0.6125
ENSG00000204019	CT83	cancer/testis antigen 83 [Source:HGNC Symbol;Acc:HGNC:33494]	0.132757137	-2.913138677	0.01903332	0.175690405	yes	down	0.47	1.46	0.4	0.22	0	0	0.22	0	0.6375	0.055
ENSG00000254788	CKLF-CMTM1	CKLF-CMTM1 readthrough [Source:HGNC Symbol;Acc:HGNC:39977]	0.144437686	-2.791480878	0.019049545	0.175813419	yes	down	0	0.21	0	2.54	0	0.18	0	0	0.6875	0.045
ENSG00000108924	HLF	HLF transcription factor, PAR bZIP family member [Source:HGNC Symbol;Acc:HGNC:4977]	0.453458698	-1.140956941	0.01921615	0.177270152	yes	down	0.19	0.24	0.6	0.24	0.21	0.08	0.12	0.05	0.3175	0.115
ENSG00000125285	SOX21	SRY-box transcription factor 21 [Source:HGNC Symbol;Acc:HGNC:11197]	3.331556081	1.736196179	0.019248947	0.177464764	yes	up	0.07	0.09	0	0	0.24	0.13	0.11	0.05	0.04	0.1325
ENSG00000164651	SP8	Sp8 transcription factor [Source:HGNC Symbol;Acc:HGNC:19196]	0.560576852	-0.835015921	0.019278921	0.177660105	yes	down	0.33	0.36	0.39	0.41	0.3	0.26	0.09	0.22	0.3725	0.2175
ENSG00000232133	IMPDH1P10	inosine monophosphate dehydrogenase 1 pseudogene 10 [Source:HGNC Symbol;Acc:HGNC:33965]	0.07760407	-3.687723865	0.019282958	0.17767032	yes	down	0	0	0.26	0	0	0	0	0	0.065	0
ENSG00000102539	MLNR	motilin receptor [Source:HGNC Symbol;Acc:HGNC:4495]	0.076064734	-3.716628456	0.019354778	0.178250833	yes	down	0.06	0.32	0	0	0	0	0	0	0.095	0
ENSG00000274629		novel transcript, antisense to CUL3	12.73136693	3.670315421	0.01951822	0.179646986	yes	up	0	0	0	0	0	0.22	0.43	0	0	0.1625
ENSG00000102934	PLLP	plasmolipin [Source:HGNC Symbol;Acc:HGNC:18553]	0.613376555	-0.705155071	0.019535354	0.179777415	yes	down	0.56	0.53	0.67	1.32	0.45	0.59	0.21	0.3	0.77	0.3875
ENSG00000260988		novel transcript	0.133899423	-2.900778352	0.019542665	0.179817413	yes	down	0.07	0.15	0	0.17	0	0	0	0.04	0.0975	0.01
ENSG00000205300		novel transcript	0.242907398	-2.041521664	0.019590919	0.180206745	yes	down	0.28	0.73	0.85	0.66	0	0	0.41	0.14	0.63	0.1375
ENSG00000262209	PCDHGB3	protocadherin gamma subfamily B, 3 [Source:HGNC Symbol;Acc:HGNC:8710]	0.076655747	-3.705462235	0.019678959	0.180852044	yes	down	0.03	0.11	0	0.03	0	0	0	0	0.0425	0
ENSG00000172578	KLHL6	kelch like family member 6 [Source:HGNC Symbol;Acc:HGNC:18653]	0.5495526	-0.86367052	0.019693524	0.18093108	yes	down	0.33	0.15	0.27	0.25	0.11	0.13	0.14	0.13	0.25	0.1275
ENSG00000287867		novel transcript	12.72999531	3.670159982	0.01971013	0.181001413	yes	up	0	0	0	0	0	0.02	0	0.04	0	0.015
ENSG00000134042	MRO	maestro [Source:HGNC Symbol;Acc:HGNC:24121]	0.323054507	-1.630150492	0.01971254	0.180996141	yes	down	0.1	0.08	0.15	0.07	0.02	0.02	0.01	0.04	0.1	0.0225
ENSG00000233421	LINC01783	long intergenic non-protein coding RNA 1783 [Source:HGNC Symbol;Acc:HGNC:52573]	0.290972207	-1.78104674	0.019716545	0.181005523	yes	down	0.18	0.15	0.32	0.4	0.05	0	0.09	0.14	0.2625	0.07
ENSG00000162836	ACP6	acid phosphatase 6, lysophosphatidic [Source:HGNC Symbol;Acc:HGNC:29609]	0.535215092	-0.901809297	0.019753482	0.181289745	yes	down	0.35	1	0.26	0.39	0.34	0.45	0.1	0.25	0.5	0.285
ENSG00000285838		novel transcript	0.644545636	-0.633645584	0.019774548	0.181455632	yes	down	2.37	2.61	2.59	2.78	1.79	1.78	1.56	2.48	2.5875	1.9025
ENSG00000112297	CRYBG1	crystallin beta-gamma domain containing 1 [Source:HGNC Symbol;Acc:HGNC:356]	1.813794284	0.859010838	0.019797058	0.181579792	yes	up	0.08	0.06	0.08	0.04	0.16	0.26	0.21	0.1	0.065	0.1825
ENSG00000247903		novel transcript, antisense to TM7SF3	1.520242509	0.604301481	0.01988638	0.182206216	yes	up	0.68	0.66	0.62	0.46	0.62	1.17	0.95	0.87	0.605	0.9025
ENSG00000229404	LINC00858	long intergenic non-protein coding RNA 858 [Source:HGNC Symbol;Acc:HGNC:27276]	1.760148445	0.815697106	0.019902452	0.18232594	yes	up	0.69	0.54	0.36	0.26	1.26	0.51	0.7	0.82	0.4625	0.8225
ENSG00000272719		novel transcript, antisense to ACTB	0.134687471	-2.892312444	0.019904292	0.182315261	yes	down	0.47	0.98	0.4	0.66	0	0	0	0.23	0.6275	0.0575
ENSG00000219507	FTH1P8	ferritin heavy chain 1 pseudogene 8 [Source:HGNC Symbol;Acc:HGNC:3995]	0.077457961	-3.69044267	0.019973463	0.182810825	yes	down	0.48	0.25	0	0.67	0	0	0	0	0.35	0
ENSG00000279648		TEC	0.134936715	-2.889645144	0.020017153	0.183155444	yes	down	0	0.17	0.12	0.06	0.03	0	0	0	0.0875	0.0075
ENSG00000154252	GAL3ST2	galactose-3-O-sulfotransferase 2 [Source:HGNC Symbol;Acc:HGNC:24869]	0.47898765	-1.061939636	0.020028312	0.183174662	yes	down	0.71	0.89	0.57	0.52	0.19	0.3	0.3	0.46	0.6725	0.3125
ENSG00000241738	ZNF90P1	zinc finger protein 90 pseudogene 1 [Source:HGNC Symbol;Acc:HGNC:12888]	0.077480094	-3.690030484	0.020129973	0.183993469	yes	down	0.18	0	0	0.03	0	0	0	0	0.0525	0
ENSG00000287587		novel transcript	0.077480094	-3.690030484	0.020129973	0.183993469	yes	down	0.32	0	0	0.06	0	0	0	0	0.095	0
ENSG00000133401	PDZD2	PDZ domain containing 2 [Source:HGNC Symbol;Acc:HGNC:18486]	1.706167385	0.77075919	0.020144543	0.184015743	yes	up	0.17	0.11	0.23	0.12	0.32	0.1	0.36	0.32	0.1575	0.275
ENSG00000254221	PCDHGB1	protocadherin gamma subfamily B, 1 [Source:HGNC Symbol;Acc:HGNC:8708]	0.267037949	-1.904883313	0.020169274	0.184075346	yes	down	0.18	0.08	0.07	0.19	0.05	0	0	0.04	0.13	0.0225
ENSG00000232926		ribosomal protein L8 (RPL8) pseudogene	2.044536261	1.03177365	0.020172703	0.184078945	yes	up	1.14	0.44	0.98	1.2	2.04	1.57	2.76	1.29	0.94	1.915
ENSG00000256364		novel transcript, antisense to MLEC	12.58640822	3.653794735	0.020187031	0.184181991	yes	up	0	0	0	0	0	0	1.02	0	0	0.255
ENSG00000286165		novel protein	12.57895045	3.652939648	0.02021386	0.184371316	yes	up	0	0	0	0	0.41	0	0	0.28	0	0.1725
ENSG00000143858	SYT2	synaptotagmin 2 [Source:HGNC Symbol;Acc:HGNC:11510]	2.592394102	1.374285057	0.020224312	0.184438918	yes	up	0.06	0.03	0	0.02	0.04	0.06	0.08	0.09	0.0275	0.0675
ENSG00000163564	PYHIN1	pyrin and HIN domain family member 1 [Source:HGNC Symbol;Acc:HGNC:28894]	0.077664461	-3.686601621	0.020233611	0.184468254	yes	down	0.13	0.04	0	0.08	0	0	0	0	0.0625	0
ENSG00000145451	GLRA3	glycine receptor alpha 3 [Source:HGNC Symbol;Acc:HGNC:4328]	0.07787205	-3.68275058	0.020347724	0.185425013	yes	down	0.05	0	0	0.01	0	0	0	0	0.015	0
ENSG00000144285	SCN1A	sodium voltage-gated channel alpha subunit 1 [Source:HGNC Symbol;Acc:HGNC:10585]	12.56026499	3.650794997	0.020372113	0.185619383	yes	up	0	0	0	0	0	0.04	0.04	0	0	0.02
ENSG00000126264	HCST	hematopoietic cell signal transducer [Source:HGNC Symbol;Acc:HGNC:16977]	0.245094688	-2.028588879	0.020375706	0.185624243	yes	down	0	1	1.9	1.71	0.76	0	0	0.31	1.1525	0.2675
ENSG00000260796		novel transcript, antisense to ATXN2L	0.077437911	-3.690816154	0.020501538	0.186630449	yes	down	0	1.31	0	0	0	0	0	0	0.3275	0
ENSG00000260996		novel transcript, overlapping NRARP	0.078173588	-3.677174939	0.020520655	0.186748427	yes	down	0.04	0.08	0.03	0.07	0	0	0	0	0.055	0
ENSG00000287906		novel transcript	2.463915031	1.300952505	0.020537578	0.186874404	yes	up	0.31	0.29	0.21	0.13	0.43	0.54	0.6	0.75	0.235	0.58
ENSG00000259527	LINC00052	long intergenic non-protein coding RNA 52 [Source:HGNC Symbol;Acc:HGNC:26455]	0.569320496	-0.812687056	0.02053798	0.186850037	yes	down	0.77	0.77	0.58	0.7	0.3	0.38	0.41	0.47	0.705	0.39
ENSG00000258376		novel transcript, antisense to PAPLN	0.078265668	-3.675476603	0.020566963	0.187057605	yes	down	0.06	0	0	0.06	0	0	0	0	0.03	0
ENSG00000277218		novel transcript	0.078290142	-3.675025531	0.020589394	0.18717743	yes	down	0	1.09	0.6	0.33	0	0	0	0	0.505	0
ENSG00000269895		novel transcript	0.078382322	-3.673327884	0.020635792	0.187486847	yes	down	0.13	0.07	0.06	0.12	0	0	0	0	0.095	0
ENSG00000131951	LRRC9	leucine rich repeat containing 9 [Source:HGNC Symbol;Acc:HGNC:19848]	0.078382322	-3.673327884	0.020635792	0.187486847	yes	down	0.03	0.01	0.01	0.09	0	0	0	0	0.035	0
ENSG00000258752		novel transcript, antisense to FOXN3	0.078451659	-3.672052229	0.020672045	0.187759985	yes	down	0.02	0.02	0	0.09	0	0	0	0	0.0325	0
ENSG00000135547	HEY2	hes related family bHLH transcription factor with YRPW motif 2 [Source:HGNC Symbol;Acc:HGNC:4881]	3.135545681	1.648716538	0.020719233	0.188132246	yes	up	0.14	0	0.05	0.03	0.2	0.19	0.07	0.18	0.055	0.16
ENSG00000268144	NIFKP6	nucleolar protein interacting with the FHA domain of MKI67 pseudogene 6 [Source:HGNC Symbol;Acc:HGNC:44954]	0.078660942	-3.668208724	0.020787687	0.188669101	yes	down	0.21	0	0	0.39	0	0	0	0	0.15	0
ENSG00000145945	FAM50B	family with sequence similarity 50 member B [Source:HGNC Symbol;Acc:HGNC:18789]	0.13667061	-2.871225064	0.020809414	0.188838043	yes	down	0.17	0	0.11	0.16	0	0	0.04	0	0.11	0.01
ENSG00000285708		novel protein	3.12670331	1.64464233	0.020814341	0.188854504	yes	up	0	0	0.18	0.01	0	0	0.3	0.35	0.0475	0.1625
ENSG00000102387	TAF7L	TATA-box binding protein associated factor 7 like [Source:HGNC Symbol;Acc:HGNC:11548]	0.078708634	-3.667334295	0.020820578	0.188882836	yes	down	0.06	0.03	0.05	0.03	0	0	0	0	0.0425	0
ENSG00000046653	GPM6B	glycoprotein M6B [Source:HGNC Symbol;Acc:HGNC:4461]	1.585946338	0.665343957	0.02082907	0.188875138	yes	up	0.41	0.21	0.3	0.4	0.45	0.56	0.56	0.47	0.33	0.51
ENSG00000147174	GCNA	germ cell nuclear acidic peptidase [Source:HGNC Symbol;Acc:HGNC:15805]	1.609358757	0.686485966	0.020863835	0.189133841	yes	up	0.56	0.56	0.45	0.38	0.93	0.8	0.79	0.42	0.4875	0.735
ENSG00000259644		novel transcript	0.078847744	-3.664786716	0.020893491	0.189317806	yes	down	0	0.06	0	0.26	0	0	0	0	0.08	0
ENSG00000183114	FAM43B	family with sequence similarity 43 member B [Source:HGNC Symbol;Acc:HGNC:31791]	0.178832619	-2.48331819	0.020898497	0.189334888	yes	down	0.16	0.09	0.12	0	0	0	0.05	0	0.0925	0.0125
ENSG00000118849	RARRES1	retinoic acid receptor responder 1 [Source:HGNC Symbol;Acc:HGNC:9867]	0.078895601	-3.663911325	0.020926517	0.189532136	yes	down	0	0.09	0.07	0.08	0	0	0	0	0.06	0
ENSG00000092421	SEMA6A	semaphorin 6A [Source:HGNC Symbol;Acc:HGNC:10738]	1.784058892	0.83516324	0.020965034	0.189824297	yes	up	0.16	0.7	0.29	0.46	0.47	0.52	0.48	1.34	0.4025	0.7025
ENSG00000285639		novel transcript	0.079036164	-3.661343256	0.021006441	0.190057382	yes	down	0.05	0.03	0.07	0	0	0	0	0	0.0375	0
ENSG00000214807	NPM1P31	nucleophosmin 1 pseudogene 31 [Source:HGNC Symbol;Acc:HGNC:45210]	0.079109831	-3.659999206	0.021018739	0.190111944	yes	down	0	0.25	0.31	0.11	0	0	0	0	0.1675	0
ENSG00000285253		novel protein	3.881928534	1.956773558	0.021060557	0.19034828	yes	up	0.06	0	0	0	0	0	0.2	0.03	0.015	0.0575
ENSG00000272109		novel transcript, antisense to ERAP1	0.184765414	-2.436233371	0.021073875	0.190383548	yes	down	0.99	0.35	0.51	0.31	0.06	0	0.07	0	0.54	0.0325
ENSG00000260229	PPIAP51	peptidylprolyl isomerase A pseudogene 51 [Source:HGNC Symbol;Acc:HGNC:53675]	0.079434854	-3.65408402	0.021230195	0.191482096	yes	down	0.25	0.26	0.65	0.24	0	0	0	0	0.35	0
ENSG00000286182		novel transcript	0.442472039	-1.176341804	0.021268413	0.191798275	yes	down	0.66	1.11	0.88	0.69	0.16	0.56	0.15	0.57	0.835	0.36
ENSG00000267221	C17orf113	chromosome 17 open reading frame 113 [Source:HGNC Symbol;Acc:HGNC:53437]	0.617765163	-0.694869577	0.021283536	0.19190613	yes	down	0.38	0.47	0.33	0.68	0.27	0.29	0.15	0.43	0.465	0.285
ENSG00000286961		novel transcript, antisense to CDH12	0.401973431	-1.314827947	0.021285279	0.191893318	yes	down	2.18	0.34	0.7	5.63	1.21	0.7	0.37	0.6	2.2125	0.72
ENSG00000225807		novel transcript	0.07964631	-3.650248663	0.021347787	0.192256855	yes	down	0.28	0	0.37	0.13	0	0	0	0	0.195	0
ENSG00000286234		novel transcript	0.079786517	-3.647711213	0.021421733	0.19286554	yes	down	0	0	0.05	0.27	0	0	0	0	0.08	0
ENSG00000280096		TEC	0.603556911	-0.728438281	0.021472106	0.193261696	yes	down	60.19	61.03	53.13	69.78	33.62	44.38	19.02	52.84	61.0325	37.465
ENSG00000159648	TEPP	testis, prostate and placenta expressed [Source:HGNC Symbol;Acc:HGNC:33745]	0.428124999	-1.223896016	0.021472969	0.193240792	yes	down	0.4	0.27	0.22	0.45	0.13	0.14	0.2	0.05	0.335	0.13
ENSG00000260342		novel protein	2.853421812	1.512693031	0.021494785	0.193379743	yes	up	0	0.9	0.28	0	1.42	0	0	1.63	0.295	0.7625
ENSG00000276216		novel transcript	0.311342023	-1.683427777	0.02163725	0.194488387	yes	down	1.98	1.93	4.7	5.73	0	1.97	0.58	1.76	3.585	1.0775
ENSG00000128254	C22orf24	chromosome 22 putative open reading frame 24 [Source:HGNC Symbol;Acc:HGNC:23051]	2.22888993	1.156325374	0.021678463	0.194801108	yes	up	0.3	0.11	0.26	0.55	0.39	0.14	0.2	0.54	0.305	0.3175
ENSG00000249693	THEGL	theg spermatid protein like [Source:HGNC Symbol;Acc:HGNC:43771]	0.495649041	-1.012609155	0.021684115	0.194823037	yes	down	0.73	0.49	0.82	0.32	0.17	0.3	0.3	0.4	0.59	0.2925
ENSG00000105409	ATP1A3	ATPase Na+/K+ transporting subunit alpha 3 [Source:HGNC Symbol;Acc:HGNC:801]	0.539979407	-0.889023707	0.021700698	0.194885442	yes	down	0.26	0.46	0.37	0.22	0.22	0.07	0.23	0.23	0.3275	0.1875
ENSG00000197123	ZNF679	zinc finger protein 679 [Source:HGNC Symbol;Acc:HGNC:28650]	0.080379779	-3.637023583	0.02176389	0.195395092	yes	down	0.06	0	0.2	0.04	0	0	0	0	0.075	0
ENSG00000236095		novel transcript	0.080379779	-3.637023583	0.02176389	0.195395092	yes	down	0.12	0	0.4	0.11	0	0	0	0	0.1575	0
ENSG00000224216		novel transcript	0.079873293	-3.646142988	0.021780736	0.195401743	yes	down	0.6	0	0	0.21	0	0	0	0	0.2025	0
ENSG00000254862	LGR4-AS1	LGR4 antisense RNA 1 [Source:HGNC Symbol;Acc:HGNC:40629]	0.080450295	-3.635758477	0.021801249	0.19552794	yes	down	0	0	0.14	0.16	0	0	0	0	0.075	0
ENSG00000239511	POM121L7P	POM121 transmembrane nucleoporin like 7 pseudogene [Source:HGNC Symbol;Acc:HGNC:35444]	0.080450295	-3.635758477	0.021801249	0.19552794	yes	down	0	0	0.07	0.08	0	0	0	0	0.0375	0
ENSG00000273003	ARL2-SNX15	ARL2-SNX15 readthrough (NMD candidate) [Source:HGNC Symbol;Acc:HGNC:49197]	0.490439336	-1.0278534	0.021831929	0.195716295	yes	down	1.05	0.21	0	0.31	0.21	0.33	0.19	0	0.3925	0.1825
ENSG00000270230	MTND6P22	MT-ND6 pseudogene 22 [Source:HGNC Symbol;Acc:HGNC:51978]	2.744634373	1.456613973	0.021928181	0.19637602	yes	up	0.92	0.72	0.2	0.65	1.53	2.1	2.21	0.91	0.6225	1.6875
ENSG00000213055	EEF1B2P7	eukaryotic translation elongation factor 1 beta 2 pseudogene 7 [Source:HGNC Symbol;Acc:HGNC:51454]	0.080713283	-3.631050064	0.021955072	0.196587819	yes	down	0.14	0	0.62	0	0	0	0	0	0.19	0
ENSG00000273442		novel transcript	0.291119763	-1.780315312	0.021990757	0.196820194	yes	down	0.48	0.38	0.63	1.14	0.12	0	0.59	0	0.6575	0.1775
ENSG00000259371		novel protein	12.2493674	3.61463534	0.022051824	0.197279432	yes	up	0	0	0	0	0	0.51	0	0.04	0	0.1375
ENSG00000134627	PIWIL4	piwi like RNA-mediated gene silencing 4 [Source:HGNC Symbol;Acc:HGNC:18444]	2.229578586	1.156771051	0.022109136	0.197704692	yes	up	0.23	0.13	0.33	0.16	0.76	0.37	0.19	0.29	0.2125	0.4025
ENSG00000279713		TEC	0.181888806	-2.458871337	0.022124674	0.197785323	yes	down	0	0.07	0.12	0.27	0.03	0	0.03	0	0.115	0.015
ENSG00000259104	PTCSC3	papillary thyroid carcinoma susceptibility candidate 3 [Source:HGNC Symbol;Acc:HGNC:43959]	0.081118906	-3.623817988	0.022185052	0.198266648	yes	down	0	0	0.83	0.18	0	0	0	0	0.2525	0
ENSG00000255114		novel transcript, antisense to HYOU1	0.317363794	-1.655790547	0.022209941	0.198430614	yes	down	0.73	3.04	0	0	1.07	0	0	0	0.9425	0.2675
ENSG00000256116		novel transcript	0.478567874	-1.063204543	0.022252851	0.198784707	yes	down	0.66	0.78	1.82	1.25	0.54	0	0.79	0.78	1.1275	0.5275
ENSG00000277531	PNMA8C	PNMA family member 8C [Source:HGNC Symbol;Acc:HGNC:53427]	0.182406583	-2.454770296	0.022406972	0.199896551	yes	down	0.03	0.02	0.08	0.07	0.03	0	0	0	0.05	0.0075
ENSG00000258773		novel transcript	2.198274753	1.136371714	0.022425817	0.200035252	yes	up	0.1	0.37	0.17	0.06	0.49	0.27	0.34	0.49	0.175	0.3975
ENSG00000287848		novel transcript, antisense to AKR1C4	5.655248068	2.49959031	0.022460778	0.200288204	yes	up	0	0	0.05	0.06	0.36	0.06	0.18	0.19	0.0275	0.1975
ENSG00000250390		novel transcript	0.0809537	-3.626759178	0.022499361	0.200543817	yes	down	0.26	0	0.22	0.58	0	0	0	0	0.265	0
ENSG00000105711	SCN1B	sodium voltage-gated channel beta subunit 1 [Source:HGNC Symbol;Acc:HGNC:10586]	0.665514438	-0.58745813	0.022518011	0.200680571	yes	down	0.73	1.23	1.33	1.12	0.99	0.75	0.33	1.02	1.1025	0.7725
ENSG00000179935	LINC00652	long intergenic non-protein coding RNA 652 [Source:HGNC Symbol;Acc:HGNC:25003]	4.107539686	2.038274514	0.022521936	0.200686061	yes	up	0.02	0.04	0.02	0	0.13	0.05	0.13	0.03	0.02	0.085
ENSG00000149050	ZNF214	zinc finger protein 214 [Source:HGNC Symbol;Acc:HGNC:13006]	0.613686584	-0.704426051	0.022558946	0.200927312	yes	down	0.43	0.35	0.22	0.33	0.16	0.28	0.17	0.19	0.3325	0.2
ENSG00000249669	CARMN	cardiac mesoderm enhancer-associated non-coding RNA [Source:HGNC Symbol;Acc:HGNC:42872]	0.519458799	-0.944918769	0.022854135	0.203258064	yes	down	0.19	0.39	0.28	0.31	0.18	0.09	0.18	0.22	0.2925	0.1675
ENSG00000288626		novel protein	12.11427206	3.598635812	0.022888327	0.203472664	yes	up	0	0	0	0	0	7.15	3.24	13.41	0	5.95
ENSG00000180211		pseudogene similar to part of ribosomal protein L23 RPL23	0.441948284	-1.178050538	0.023032871	0.204487942	yes	down	3.71	1.92	5.05	4.48	0.35	2.29	1.76	2.15	3.79	1.6375
ENSG00000260805		novel transcript	0.62955144	-0.66760383	0.023072299	0.204778049	yes	down	1.17	0.92	1.05	1.04	0.53	0.77	0.53	0.75	1.045	0.645
ENSG00000243859	RPL5P17	ribosomal protein L5 pseudogene 17 [Source:HGNC Symbol;Acc:HGNC:36605]	5.61125652	2.488323867	0.023084046	0.204822373	yes	up	0	0.1	0	0.09	0.37	0.19	0.19	0.49	0.0475	0.31
ENSG00000153714	LURAP1L	leucine rich adaptor protein 1 like [Source:HGNC Symbol;Acc:HGNC:31452]	0.640902301	-0.641823645	0.023098598	0.204921518	yes	down	0.77	0.98	1.08	1.05	0.76	0.86	0.49	0.56	0.97	0.6675
ENSG00000253106		novel transcript, antisense to TATDN1	1.625318962	0.700722869	0.023124343	0.205059956	yes	up	0.26	0.24	0.55	0.72	0.61	0.48	1.02	0.75	0.4425	0.715
ENSG00000213906	LTB4R2	leukotriene B4 receptor 2 [Source:HGNC Symbol;Acc:HGNC:19260]	0.199651481	-2.324444322	0.023173266	0.205313711	yes	down	0.76	0.65	0	0.54	0	0	0	0.33	0.4875	0.0825
ENSG00000261011	AGAP11	ArfGAP with GTPase domain, ankyrin repeat and PH domain 11 [Source:HGNC Symbol;Acc:HGNC:29421]	0.563506696	-0.827495342	0.023283446	0.206109292	yes	down	0.96	0.75	0.21	1.14	0	0.32	0.67	0.68	0.765	0.4175
ENSG00000007402	CACNA2D2	calcium voltage-gated channel auxiliary subunit alpha2delta 2 [Source:HGNC Symbol;Acc:HGNC:1400]	0.509772064	-0.97207578	0.02333807	0.206502429	yes	down	0.29	0.44	0.31	0.16	0.21	0.38	0.08	0.16	0.3	0.2075
ENSG00000272189		novel transcript, antisense to MAP7	0.547748056	-0.868415637	0.023567504	0.208137871	yes	down	0.92	0.5	0.61	0.48	0.32	0.29	0.5	0.23	0.6275	0.335
ENSG00000227198	C6orf47-AS1	C6orf47 antisense RNA 1 [Source:HGNC Symbol;Acc:HGNC:39767]	11.91502831	3.574710475	0.023595669	0.208325959	yes	up	0	0	0	0	0.75	0	0	0	0	0.1875
ENSG00000259224	SLC35G6	solute carrier family 35 member G6 [Source:HGNC Symbol;Acc:HGNC:31351]	4.630760683	2.211249201	0.023636129	0.208622456	yes	up	0	0.04	0	0.08	0.16	0.21	0	0.26	0.03	0.1575
ENSG00000186704	DTX2P1	DTX2 pseudogene 1 [Source:HGNC Symbol;Acc:HGNC:42352]	3.715470672	1.893544981	0.023702213	0.209144879	yes	up	0	0.22	0	0	0	0.83	0	0	0.055	0.2075
ENSG00000273032	DGCR5	DiGeorge syndrome critical region gene 5 [Source:NCBI gene (formerly Entrezgene);Acc:26220]	0.462698937	-1.111854311	0.023880614	0.210565923	yes	down	0.12	0.15	0.19	0.29	0.02	0.04	0.26	0.06	0.1875	0.095
ENSG00000254400		novel transcript	0.296717864	-1.752836309	0.024062812	0.212018359	yes	down	0	4.3	3.21	1.55	0	0	1.96	0.47	2.265	0.6075
ENSG00000275969	SPATA31A3	SPATA31 subfamily A member 3 [Source:HGNC Symbol;Acc:HGNC:32003]	0.147031868	-2.765799216	0.024204393	0.213018326	yes	down	0	0.04	0.11	0	0.02	0	0	0	0.0375	0.005
ENSG00000124104	SNX21	sorting nexin family member 21 [Source:HGNC Symbol;Acc:HGNC:16154]	1.578279709	0.658352908	0.024245534	0.213287571	yes	up	0.43	0.4	0.41	0.47	0.53	0.59	0.83	0.98	0.4275	0.7325
ENSG00000285928		novel transcript	5.525605672	2.46613261	0.024335965	0.213989997	yes	up	0	0.08	0	0	0.19	0.15	0.11	0.04	0.02	0.1225
ENSG00000235493	LINC01967	long intergenic non-protein coding RNA 1967 [Source:HGNC Symbol;Acc:HGNC:52793]	2.529341494	1.338761833	0.024383502	0.214345862	yes	up	0.63	0.5	0.36	0.03	1.45	1.08	0.79	0.45	0.38	0.9425
ENSG00000260899		novel transcript	1.95011685	0.963560572	0.02439104	0.214381055	yes	up	0.71	1.08	0.17	0.93	1.98	1.44	1.28	0.76	0.7225	1.365
ENSG00000167751	KLK2	kallikrein related peptidase 2 [Source:HGNC Symbol;Acc:HGNC:6363]	4.047730072	2.017113085	0.024416085	0.21453902	yes	up	0.2	0.23	0.17	0.12	0.55	0.23	0.27	0.61	0.18	0.415
ENSG00000134013	LOXL2	lysyl oxidase like 2 [Source:HGNC Symbol;Acc:HGNC:6666]	2.090094679	1.063568296	0.024554425	0.215473694	yes	up	0.42	0.25	0.06	0.16	0.59	0.22	0.79	0.44	0.2225	0.51
ENSG00000181227	DLSTP1	dihydrolipoamide S-succinyltransferase pseudogene 1 [Source:HGNC Symbol;Acc:HGNC:2912]	0.147230468	-2.763851844	0.02459211	0.215710781	yes	down	0.31	0	0	0.26	0	0.03	0	0.04	0.1425	0.0175
ENSG00000182676	PPP1R27	protein phosphatase 1 regulatory subunit 27 [Source:HGNC Symbol;Acc:HGNC:16813]	0.385864576	-1.373833491	0.024696932	0.216567607	yes	down	0.67	2.11	0.7	0.65	0.45	0.22	0.22	0.34	1.0325	0.3075
ENSG00000269469		novel protein	11.7541946	3.555103783	0.024719762	0.216705155	yes	up	0	0	0	0	0.43	0	0.16	0.15	0	0.185
ENSG00000277801		novel transcript	1.502645224	0.587504428	0.02472253	0.216666799	yes	up	2.38	2.09	2.06	3.01	3.72	3.74	3.53	3.08	2.385	3.5175
ENSG00000271789		novel transcript	0.363903265	-1.4583731	0.024737284	0.216764782	yes	down	0.32	0.22	0.42	0.55	0.1	0.26	0.05	0.11	0.3775	0.13
ENSG00000211452	DIO1	iodothyronine deiodinase 1 [Source:HGNC Symbol;Acc:HGNC:2883]	4.564519468	2.190462988	0.024978439	0.218625308	yes	up	0.09	0.04	0	0	0.12	0.17	0.25	0.09	0.0325	0.1575
ENSG00000100055	CYTH4	cytohesin 4 [Source:HGNC Symbol;Acc:HGNC:9505]	0.36489413	-1.454450153	0.025129528	0.219789173	yes	down	0.13	0.24	0.47	0.31	0.31	0.13	0	0.09	0.2875	0.1325
ENSG00000187193	MT1X	metallothionein 1X [Source:HGNC Symbol;Acc:HGNC:7405]	0.524918411	-0.929834894	0.025134182	0.219798184	yes	down	5.34	4.65	8.35	4.92	2.3	2.24	3.09	3.54	5.815	2.7925
ENSG00000287837		novel transcript	2.907259543	1.539659873	0.025202418	0.220299642	yes	up	0.36	0.19	0.15	0.08	0.43	0.97	0.43	0.45	0.195	0.57
ENSG00000250508	LINC02701	long intergenic non-protein coding RNA 2701 [Source:HGNC Symbol;Acc:HGNC:54216]	0.618829694	-0.692385669	0.025368292	0.221653758	yes	down	0.62	0.5	0.44	0.47	0.29	0.35	0.28	0.31	0.5075	0.3075
ENSG00000212232	SNORD17	small nucleolar RNA, C/D box 17 [Source:HGNC Symbol;Acc:HGNC:32713]	6.08422959	2.605074595	0.025377986	0.221706526	yes	up	0	1.01	0	0	4.59	1.19	1.4	0	0.2525	1.795
ENSG00000288271		novel transcript	0.084059711	-3.572441687	0.025691136	0.223894134	yes	down	0	0.09	0	0.06	0	0	0	0	0.0375	0
ENSG00000255089		novel transcript, antisense to IFITM3	2.386865837	1.255117477	0.025736971	0.224261362	yes	up	6.41	0.66	6.08	5.28	9.7	12.65	8.35	14.62	4.6075	11.33
ENSG00000275160		ribosomal protein L7a (RPL7A) pseudogene	0.371263926	-1.429482955	0.025746273	0.224310194	yes	down	0.73	1.33	1.46	1.75	0.66	0.45	0.39	0.36	1.3175	0.465
ENSG00000138675	FGF5	fibroblast growth factor 5 [Source:HGNC Symbol;Acc:HGNC:3683]	0.639244264	-0.645560785	0.025956692	0.225883911	yes	down	0.29	0.32	0.35	0.43	0.27	0.45	0.21	0.27	0.3475	0.3
ENSG00000279511		TEC	0.35255514	-1.504079179	0.026004765	0.226140061	yes	down	0.09	0.13	0.18	0.06	0.02	0.07	0	0.07	0.115	0.04
ENSG00000225507		pseudogene similar to part of TTK protein kinase TTK	0.085258932	-3.552005206	0.026113898	0.226861452	yes	down	1.3	0	0	0	0.01	0	0	0	0.325	0.0025
ENSG00000102362	SYTL4	synaptotagmin like 4 [Source:HGNC Symbol;Acc:HGNC:15588]	0.642420125	-0.638411005	0.026329897	0.228541548	yes	down	1.09	0.44	0.71	0.52	0.42	0.28	0.43	0.3	0.69	0.3575
ENSG00000185668	POU3F1	POU class 3 homeobox 1 [Source:HGNC Symbol;Acc:HGNC:9214]	0.255605731	-1.968007913	0.026394206	0.229034205	yes	down	0.09	0.09	0.15	0.04	0.02	0.04	0.02	0	0.0925	0.02
ENSG00000286899		novel transcript, antisense to AGO1	0.279396322	-1.839615066	0.026483724	0.229679574	yes	down	0.16	0.16	0.14	0.29	0.11	0.04	0.04	0	0.1875	0.0475
ENSG00000251434		novel transcript	0.635981961	-0.652942249	0.026531684	0.230062616	yes	down	4.22	3.84	5.15	6.43	2.01	3.18	4.58	2.45	4.91	3.055
ENSG00000260447		novel transcript, antisense to PKD1	11.45864655	3.518364743	0.026590266	0.230504705	yes	up	0	0	0	0	0.33	0	0.48	0	0	0.2025
ENSG00000231794		novel transcript, antisense to WDR91	11.47414505	3.520314756	0.026606924	0.230616152	yes	up	0	0	0	0	0.04	0	0.11	0.04	0	0.0475
ENSG00000138772	ANXA3	annexin A3 [Source:HGNC Symbol;Acc:HGNC:541]	0.637672407	-0.649112639	0.026767891	0.231680314	yes	down	2.43	1.22	2.13	1.67	1.58	1.51	1.4	1.14	1.8625	1.4075
ENSG00000058866	DGKG	diacylglycerol kinase gamma [Source:HGNC Symbol;Acc:HGNC:2853]	1.88993762	0.918338617	0.026772066	0.231650352	yes	up	0.42	0.33	0.79	0.25	0.78	0.64	1.02	0.66	0.4475	0.775
ENSG00000215895	HSPA5P1	HSPA5 pseudogene 1 [Source:HGNC Symbol;Acc:HGNC:54532]	0.280156635	-1.835694434	0.026808622	0.231900509	yes	down	0.28	0.07	0.12	0.2	0.07	0.03	0	0.07	0.1675	0.0425
ENSG00000267939		novel transcript	0.391450296	-1.35309896	0.026917204	0.232806565	yes	down	1.04	0.72	0.95	1.28	0.28	0.1	0.48	0.56	0.9975	0.355
ENSG00000287957		novel transcript, antisense to RIC8B	2.597251054	1.376985474	0.026968563	0.23321752	yes	up	0.03	0.09	0.04	0.03	0.11	0.07	0.07	0.26	0.0475	0.1275
ENSG00000250859	HNRNPKP1	heterogeneous nuclear ribonucleoprotein K pseudogene 1 [Source:HGNC Symbol;Acc:HGNC:42374]	11.42346837	3.51392884	0.027058446	0.233928112	yes	up	0	0	0	0	0	0	0.16	0.11	0	0.0675
ENSG00000270558		chromobox homolog 3 (CBX3) pseudogene	2.917612405	1.544788239	0.027072018	0.234012097	yes	up	0.95	0.22	0.37	0.33	0.84	1.52	1.98	1.15	0.4675	1.3725
ENSG00000139890	REM2	RRAD and GEM like GTPase 2 [Source:HGNC Symbol;Acc:HGNC:20248]	0.499727479	-1.000786545	0.027115619	0.234288833	yes	down	0.49	0.61	0.54	0.48	0.2	0.28	0.28	0.29	0.53	0.2625
ENSG00000161921	CXCL16	C-X-C motif chemokine ligand 16 [Source:HGNC Symbol;Acc:HGNC:16642]	0.300725441	-1.733481169	0.027120378	0.234296585	yes	down	0.27	0.23	0.3	0.24	0.06	0.13	0	0.05	0.26	0.06
ENSG00000248268		novel transcript	0.601464526	-0.733448444	0.027155516	0.234499959	yes	down	4.31	5.75	5.24	2.52	2.68	3.45	2.79	1.5	4.455	2.605
ENSG00000273284		novel transcript, sense intronic to ANKRD12	0.618625093	-0.692862741	0.027218289	0.234975136	yes	down	2.67	1.68	1.96	1.6	1.01	1.36	0.95	1.48	1.9775	1.2
ENSG00000223973	PAFAH1B1P2	platelet activating factor acetylhydrolase 1b regulatory subunit 1 pseudogene 2 [Source:HGNC Symbol;Acc:HGNC:8578]	0.190793651	-2.389914933	0.027254892	0.235157272	yes	down	0.04	0	0.94	0.29	0	0	0	0.28	0.3175	0.07
ENSG00000167100	SAMD14	sterile alpha motif domain containing 14 [Source:HGNC Symbol;Acc:HGNC:27312]	11.37352152	3.507607112	0.027288887	0.235383625	yes	up	0	0	0	0	0	0.01	0.24	0	0	0.0625
ENSG00000256813		novel transcript	0.112230565	-3.155462455	0.027358277	0.235948608	yes	down	0	2.06	0	0	0.1	0	0	0	0.515	0.025
ENSG00000267672		novel transcript	0.145492957	-2.780978778	0.027412753	0.236384824	yes	down	0.19	0.32	0.11	0	0	0.06	0	0	0.155	0.015
ENSG00000254531	FLJ20021	uncharacterized LOC90024 [Source:NCBI gene (formerly Entrezgene);Acc:90024]	0.649577263	-0.62242696	0.027428364	0.236418622	yes	down	4.94	3.66	5.68	3.43	3.11	2.71	1.65	2.87	4.4275	2.585
ENSG00000244630		ribosomal protein S26 (RPS26) pseudogene	11.37309817	3.50755341	0.027609827	0.237813795	yes	up	0	0	0	0	0	0	0	3.2	0	0.8
ENSG00000226306	NPY6R	neuropeptide Y receptor Y6 (pseudogene) [Source:HGNC Symbol;Acc:HGNC:7959]	0.145894958	-2.776998068	0.027627321	0.237930697	yes	down	0.07	0.22	0.06	0.13	0	0.02	0	0	0.12	0.005
ENSG00000213700	RPL17P50	ribosomal protein L17 pseudogene 50 [Source:HGNC Symbol;Acc:HGNC:45098]	11.34382341	3.503835074	0.027654891	0.238134327	yes	up	0	0	0	0	0	0.43	0.2	0.42	0	0.2625
ENSG00000287999		novel transcript	3.298836871	1.721957438	0.027676664	0.238287987	yes	up	4.52	1.22	0.81	3.95	17.81	0.47	4.99	11.61	2.625	8.72
ENSG00000101276	SLC52A3	solute carrier family 52 member 3 [Source:HGNC Symbol;Acc:HGNC:16187]	0.642614815	-0.637973852	0.027698237	0.238406049	yes	down	1.1	0.73	0.71	1.17	0.32	0.66	0.71	0.49	0.9275	0.545
ENSG00000232710		novel transcript	11.32012702	3.500818241	0.027859847	0.239457316	yes	up	0	0	0	0	0.14	0	0	0.59	0	0.1825
ENSG00000236013		novel transcript	11.32012702	3.500818241	0.027859847	0.239457316	yes	up	0	0	0	0	0.04	0	0	0.15	0	0.0475
ENSG00000175591	P2RY2	purinergic receptor P2Y2 [Source:HGNC Symbol;Acc:HGNC:8541]	11.29063709	3.49705499	0.0278605	0.239395096	yes	up	0	0	0	0	0.01	0.02	0.01	0	0	0.01
ENSG00000258679		novel YWHA pseudogene	11.30948425	3.499461234	0.027863916	0.239356638	yes	up	0	0	0	0	0.02	0	0.02	0.05	0	0.0225
ENSG00000262294		novel transcript, antisense to RPH3AL	11.31356229	3.499981356	0.027889912	0.239546028	yes	up	0	0	0	0	0	0.37	0	0.25	0	0.155
ENSG00000266729	DSG1-AS1	DSG1 antisense RNA 1 [Source:HGNC Symbol;Acc:HGNC:51115]	11.31103253	3.499658727	0.027902278	0.239618319	yes	up	0	0	0	0	0	0	0.59	0.58	0	0.2925
ENSG00000272601		EF-hand calcium binding domain 3 (EFCAB3) pseudogene	7.788952168	2.961429258	0.028044817	0.240740171	yes	up	0.07	0.1	0.03	0	0	2.35	0	0.28	0.05	0.6575
ENSG00000237917	PARP4P1	poly(ADP-ribose) polymerase family member 4 pseudogene 1 [Source:HGNC Symbol;Acc:HGNC:18500]	11.26951252	3.494353205	0.028100534	0.241150206	yes	up	0	0	0	0	0.03	0.03	0.03	0.06	0	0.0375
ENSG00000226284	ARPC3P1	actin related protein 2/3 complex subunit 3 pseudogene 1 [Source:HGNC Symbol;Acc:HGNC:16092]	11.26745773	3.494090132	0.028111143	0.241207128	yes	up	0	0	0	0	0.42	0	0	0.65	0	0.2675
ENSG00000283097		TEC	11.25841702	3.492932088	0.028153784	0.241538841	yes	up	0	0	0	0	0.02	0	0.05	0.05	0	0.03
ENSG00000075290	WNT8B	Wnt family member 8B [Source:HGNC Symbol;Acc:HGNC:12789]	11.25841702	3.492932088	0.028153784	0.241538841	yes	up	0	0	0	0	0.03	0	0.06	0.07	0	0.04
ENSG00000189332	SLC25A51P4	SLC25A51 pseudogene 4 [Source:HGNC Symbol;Acc:HGNC:54321]	11.24984826	3.491833637	0.028194644	0.241820994	yes	up	0	0	0	0	0.03	0.07	0.03	0.03	0	0.04
ENSG00000239455		protein tyrosine phosphatase, non-receptor type 11 (PTPN11) pseudogene	11.24082603	3.49067615	0.028237352	0.242153057	yes	up	0	0	0	0	0	0.08	0.12	0	0	0.05
ENSG00000224940	PRRT4	proline rich transmembrane protein 4 [Source:HGNC Symbol;Acc:HGNC:37280]	11.24082603	3.49067615	0.028237352	0.242153057	yes	up	0	0	0	0	0	0.08	0.07	0	0	0.0375
ENSG00000270462		novel transcript, antisense to C2orf3	11.23877678	3.490413117	0.028247993	0.242175843	yes	up	0	0	0	0	0.36	0.4	0.73	0.37	0	0.465
ENSG00000231799	PA2G4P6	proliferation-associated 2G4 pseudogene 6 [Source:HGNC Symbol;Acc:HGNC:32219]	11.23672784	3.490150076	0.028258637	0.242164426	yes	up	0	0	0	0	0.12	0	0.06	0.13	0	0.0775
ENSG00000262777		novel transcript, antisense to CRK	11.22771873	3.488992922	0.028301399	0.242462375	yes	up	0	0	0	0	0.18	0	0.56	0.19	0	0.2325
ENSG00000267586	LINC00907	long intergenic non-protein coding RNA 907 [Source:HGNC Symbol;Acc:HGNC:44327]	11.22771873	3.488992922	0.028301399	0.242462375	yes	up	0	0	0	0	0.02	0	0.21	0.11	0	0.085
ENSG00000260088	DDX59-AS1	DDX59 antisense RNA 1 [Source:HGNC Symbol;Acc:HGNC:41094]	0.160008851	-2.643776384	0.028318846	0.242509104	yes	down	0.38	0.26	0.33	0.36	0.12	0	0	0.03	0.3325	0.0375
ENSG00000287872		novel transcript	11.21713421	3.487632233	0.028353043	0.242733422	yes	up	0	0	0	0	0.04	0.02	0.02	0.02	0	0.025
ENSG00000269901		novel transcript, antisense to FBXO31	11.21713421	3.487632233	0.028353043	0.242733422	yes	up	0	0	0	0	0.59	0.32	0.3	0.31	0	0.38
ENSG00000162383	SLC1A7	solute carrier family 1 member 7 [Source:HGNC Symbol;Acc:HGNC:10945]	11.21508934	3.487369208	0.028363712	0.242721999	yes	up	0	0	0	0	0.08	0	0	0.06	0	0.035
ENSG00000278765		novel transcript	0.323187616	-1.629556179	0.028377237	0.242769245	yes	down	0.73	0.76	1.1	1.54	0.17	0.37	0.35	0.36	1.0325	0.3125
ENSG00000178715		ribosomal protein S16 (RPS16) pseudogene	11.22039022	3.488050945	0.028380215	0.242760485	yes	up	0	0	0	0	0	0.69	0.95	0	0	0.41
ENSG00000126970	ZC4H2	zinc finger C4H2-type containing [Source:HGNC Symbol;Acc:HGNC:24931]	11.20814531	3.486475659	0.028395882	0.242860258	yes	up	0	0	0	0	0.17	0.11	0.52	0	0	0.2
ENSG00000234503		novel transcript	11.20610222	3.486212653	0.028406561	0.242917344	yes	up	0	0	0	0	0.22	0	0.23	0.12	0	0.1425
ENSG00000271715		novel transcript	11.20610222	3.486212653	0.028406561	0.242917344	yes	up	0	0	0	0	0.66	0	0.66	0.34	0	0.415
ENSG00000228000	RPL7AP65	ribosomal protein L7a pseudogene 65 [Source:HGNC Symbol;Acc:HGNC:37031]	0.147331567	-2.762861526	0.028414757	0.242918946	yes	down	0.49	0.26	0.21	0.23	0	0	0.12	0	0.2975	0.03
ENSG00000165730	STOX1	storkhead box 1 [Source:HGNC Symbol;Acc:HGNC:23508]	1.899190656	0.925384742	0.028424378	0.242966956	yes	up	0.14	0.12	0.21	0.16	0.53	0.38	0.18	0.32	0.1575	0.3525
ENSG00000238273		novel transcript, antisense to FHL2	11.19712463	3.485056397	0.028449444	0.243112703	yes	up	0	0	0	0	0.03	0	0.37	0	0	0.1
ENSG00000233266	HMGB1P31	high mobility group box 1 pseudogene 31 [Source:HGNC Symbol;Acc:HGNC:39122]	11.19554225	3.484852501	0.028458315	0.243154258	yes	up	0	0	0	0	1.01	0.37	0	0.34	0	0.43
ENSG00000132026	RTBDN	retbindin [Source:HGNC Symbol;Acc:HGNC:30310]	0.553051413	-0.854514492	0.028498669	0.243430482	yes	down	0.81	1.95	1.23	1.48	0.62	1.03	0.86	0.34	1.3675	0.7125
ENSG00000154764	WNT7A	Wnt family member 7A [Source:HGNC Symbol;Acc:HGNC:12786]	0.530717135	-0.913984966	0.028500622	0.243412886	yes	down	0.23	0.22	0.29	0.21	0.14	0.09	0.08	0.18	0.2375	0.1225
ENSG00000244945	RUFY1-AS1	RUFY1 antisense RNA 1 [Source:HGNC Symbol;Acc:HGNC:40903]	0.087731386	-3.510763135	0.028668359	0.244604406	yes	down	0.04	0.04	0.03	0.07	0	0	0	0	0.045	0
ENSG00000226360	RPL10AP6	ribosomal protein L10a pseudogene 6 [Source:HGNC Symbol;Acc:HGNC:36504]	11.15521537	3.479646462	0.028699077	0.244797642	yes	up	0	0	0	0	0.29	0	0.44	0	0	0.1825
ENSG00000259287		novel transcript, antisense to RYR3	11.14358683	3.478141768	0.028712621	0.244844314	yes	up	0	0	0	0	0.76	0.2	0	0	0	0.24
ENSG00000231707	PABPC1P1	poly(A) binding protein cytoplasmic 1 pseudogene 1 [Source:HGNC Symbol;Acc:HGNC:8558]	11.13264409	3.476724379	0.028766518	0.245269434	yes	up	0	0	0	0	0.69	0	0.17	0	0	0.215
ENSG00000263809		novel protein	0.290118554	-1.785285532	0.028809423	0.245600733	yes	down	0.05	0.3	0.08	0	0	0.02	0.04	0.05	0.1075	0.0275
ENSG00000233695	GAS6-AS1	GAS6 antisense RNA 1 [Source:HGNC Symbol;Acc:HGNC:39826]	2.742498775	1.455490976	0.02886056	0.245932999	yes	up	0.03	0.01	0.04	0.01	0.08	0.06	0.05	0.04	0.0225	0.0575
ENSG00000287709		novel transcript	11.11125138	3.473949401	0.02887265	0.245966918	yes	up	0	0	0	0	0.27	0	0	0	0	0.0675
ENSG00000128266	GNAZ	G protein subunit alpha z [Source:HGNC Symbol;Acc:HGNC:4395]	2.501478558	1.322781086	0.028874364	0.245946981	yes	up	0.23	0.06	0.04	0.08	0.28	0.1	0.1	0.17	0.1025	0.1625
ENSG00000178115	GOLGA8Q	golgin A8 family member Q [Source:HGNC Symbol;Acc:HGNC:44408]	11.15058644	3.479047682	0.028942308	0.246318207	yes	up	0	0	0	0	0	0.18	0	0	0	0.045
ENSG00000270726		novel transcript	6.706198017	2.745495083	0.029013809	0.246788235	yes	up	0	0.13	0	0	0.12	0.09	0.13	0.77	0.0325	0.2775
ENSG00000204248	COL11A2	collagen type XI alpha 2 chain [Source:HGNC Symbol;Acc:HGNC:2187]	1.789999145	0.839958898	0.029045151	0.247020197	yes	up	0.4	0.2	0.18	0.22	0.43	0.28	0.45	0.39	0.25	0.3875
ENSG00000070808	CAMK2A	calcium/calmodulin dependent protein kinase II alpha [Source:HGNC Symbol;Acc:HGNC:1460]	0.615047461	-0.701230352	0.029137479	0.247735956	yes	down	0.96	0.82	0.23	0.53	0.23	0.22	0.24	0.27	0.635	0.24
ENSG00000231154	MORF4L2-AS1	MORF4L2 antisense RNA 1 [Source:HGNC Symbol;Acc:HGNC:27991]	0.526644803	-0.925097834	0.029391195	0.249543377	yes	down	0.53	0.38	0.43	0.56	0.35	0.1	0.26	0.27	0.475	0.245
ENSG00000058091	CDK14	cyclin dependent kinase 14 [Source:HGNC Symbol;Acc:HGNC:8883]	1.891703233	0.919685779	0.02941594	0.249683582	yes	up	0.06	0.11	0.13	0.27	0.49	0.12	0.18	0.57	0.1425	0.34
ENSG00000171126	KCNG3	potassium voltage-gated channel modifier subfamily G member 3 [Source:HGNC Symbol;Acc:HGNC:18306]	0.445362216	-1.166948927	0.029442301	0.249872374	yes	down	0.09	0.18	0.2	0.22	0.07	0.05	0.03	0.15	0.1725	0.075
ENSG00000269693		novel transcript	0.616361118	-0.69815224	0.029442345	0.249837798	yes	down	0.16	0.34	0.44	0.04	0.07	0.22	0.3	0	0.245	0.1475
ENSG00000267073		novel transcript	0.19021202	-2.394319674	0.029565871	0.25067561	yes	down	0.38	3.21	0.32	4.19	0	0.39	0.36	0	2.025	0.1875
ENSG00000244067	GSTA2	glutathione S-transferase alpha 2 [Source:HGNC Symbol;Acc:HGNC:4627]	0.305065596	-1.712808607	0.029587827	0.250791666	yes	down	0.25	0.52	0.36	0.18	0.06	0	0.18	0.13	0.3275	0.0925
ENSG00000228998		PERP, TP53 apoptosis effector (PERP) pseudogene	1.683596026	0.751546009	0.029658781	0.251322854	yes	up	3.43	2.35	0.83	2.27	3.48	3.5	4.03	3.44	2.22	3.6125
ENSG00000152705	CATSPER3	cation channel sperm associated 3 [Source:HGNC Symbol;Acc:HGNC:20819]	2.220742877	1.151042364	0.029671978	0.251399561	yes	up	0.24	0.34	0.14	0.26	0.63	0.54	0.35	0.64	0.245	0.54
ENSG00000225217	HSPA7	heat shock protein family A (Hsp70) member 7 (pseudogene) [Source:HGNC Symbol;Acc:HGNC:5240]	0.356027657	-1.489938779	0.029901183	0.253129414	yes	down	0.18	0.19	0.25	0.31	0	0.12	0.08	0.11	0.2325	0.0775
ENSG00000108370	RGS9	regulator of G protein signaling 9 [Source:HGNC Symbol;Acc:HGNC:10004]	0.318137955	-1.652275594	0.030038309	0.25414839	yes	down	0.34	0.1	0.33	0.24	0	0	0.28	0.06	0.2525	0.085
ENSG00000287364		novel transcript	0.150291366	-2.734165964	0.030072423	0.25440154	yes	down	0.09	0	0.09	0.11	0	0.01	0	0	0.0725	0.0025
ENSG00000283183		novel transcript	0.150306793	-2.73401788	0.030087195	0.254455544	yes	down	0.09	0.04	0.13	0.15	0	0	0	0.15	0.1025	0.0375
ENSG00000254905		novel transcript, antisense to TIRAP	0.089850932	-3.476322724	0.03020106	0.255276173	yes	down	0.45	0	0.79	0	0	0	0	0	0.31	0
ENSG00000234969	AARSD1P1	AARSD1 pseudogene 1 [Source:HGNC Symbol;Acc:HGNC:54994]	10.99045691	3.458179459	0.03021325	0.25534363	yes	up	0	0	0	0	0.06	0	0	0.26	0	0.08
ENSG00000236212		novel transcript	5.313547988	2.409675506	0.030263833	0.255628675	yes	up	0	0	0.08	0	0.09	0.13	0.09	0.23	0.02	0.135
ENSG00000136379	ABHD17C	abhydrolase domain containing 17C, depalmitoylase [Source:HGNC Symbol;Acc:HGNC:26925]	2.432686871	1.282550632	0.030353667	0.256209112	yes	up	0	0.12	0.07	0.29	0.11	0.88	0.4	0.26	0.12	0.4125
ENSG00000245261		novel transcript	3.820328426	1.933696669	0.030398151	0.256406205	yes	up	0.04	0.2	0.06	0.05	0.48	0.27	0.27	0.35	0.0875	0.3425
ENSG00000287751		novel family with sequence similarity 106 pseudogene	9.696557412	3.277472635	0.030420719	0.256560896	yes	up	0	0	0	0.05	0	0	0.73	0.72	0.0125	0.3625
ENSG00000279742		TEC	0.562534643	-0.829986149	0.03052698	0.257313978	yes	down	0.47	0.29	0.56	0.56	0.22	0.28	0.31	0.23	0.47	0.26
ENSG00000138696	BMPR1B	bone morphogenetic protein receptor type 1B [Source:HGNC Symbol;Acc:HGNC:1077]	3.314912238	1.728970675	0.030542139	0.257405987	yes	up	0	0	0.04	0.5	0.09	0.06	0.07	0.07	0.135	0.0725
ENSG00000285103		novel transcript	0.536690963	-0.897836498	0.030608481	0.257857647	yes	down	0.6	0.48	0.42	0.19	0.48	0.31	0.11	0.33	0.4225	0.3075
ENSG00000266933	MADCAM1-AS1	MADCAM1 antisense RNA 1 [Source:HGNC Symbol;Acc:HGNC:55315]	2.230846516	1.157591258	0.030618512	0.257906336	yes	up	0.2	0.18	0.46	0.89	0.87	0.19	1.64	1.19	0.4325	0.9725
ENSG00000206129		novel transcript	0.384957023	-1.377230704	0.030619493	0.257878791	yes	down	0	0.32	0.43	0.36	0.16	0.07	0.14	0.2	0.2775	0.1425
ENSG00000286181		FOXP3 regulating long intergenic non-coding RNA	4.41545799	2.142563088	0.03065967	0.258145481	yes	up	0	0.02	0.01	0.07	0.13	0.12	0.06	0.07	0.025	0.095
ENSG00000119699	TGFB3	transforming growth factor beta 3 [Source:HGNC Symbol;Acc:HGNC:11769]	0.665152681	-0.588242555	0.030725695	0.258629608	yes	down	0.55	0.71	0.62	1	0.35	0.3	0.41	0.61	0.72	0.4175
ENSG00000255390	DCHS1-AS1	DCHS1 antisense RNA 1 [Source:HGNC Symbol;Acc:HGNC:40650]	10.91027866	3.447616044	0.030726229	0.25859822	yes	up	0	0	0	0	0	0	0.3	0.21	0	0.1275
ENSG00000140459	CYP11A1	cytochrome P450 family 11 subfamily A member 1 [Source:HGNC Symbol;Acc:HGNC:2590]	1.694224777	0.760625293	0.030741415	0.258690134	yes	up	0.63	0.46	0.49	0.29	0.73	0.62	1.06	1.58	0.4675	0.9975
ENSG00000214719		novel transcript	0.621300859	-0.686636045	0.030920848	0.260055778	yes	down	1.53	1.13	2.08	1.44	0.39	0.5	0.94	0.94	1.545	0.6925
ENSG00000264451		novel transcript	0.192961813	-2.373612726	0.030988876	0.260519566	yes	down	0.55	0.28	0.35	0.51	0	0	0.26	0	0.4225	0.065
ENSG00000231256	CFAP97D1	CFAP97 domain containing 1 [Source:HGNC Symbol;Acc:HGNC:37241]	0.090121263	-3.47198865	0.031012605	0.260646812	yes	down	0.02	0.02	0	0.05	0	0	0	0	0.0225	0
ENSG00000213420	GPC2	glypican 2 [Source:HGNC Symbol;Acc:HGNC:4450]	0.642589534	-0.638030611	0.031023121	0.260699071	yes	down	1.56	1.59	0.94	1.1	0.84	0.4	0.61	0.83	1.2975	0.67
ENSG00000277027	RMRP	RNA component of mitochondrial RNA processing endoribonuclease [Source:HGNC Symbol;Acc:HGNC:10031]	1.724321801	0.786029042	0.031160966	0.261531383	yes	up	11.28	23	9.09	23	25.95	23.14	31.43	32.27	16.5925	28.1975
ENSG00000237718		novel transcript	10.78995683	3.431617187	0.031273178	0.262327998	yes	up	0	0	0	0	0.26	0	0	0	0	0.065
ENSG00000259271	ANKRD62P1	ankyrin repeat domain 62 pseudogene 1 [Source:HGNC Symbol;Acc:HGNC:42363]	6.657933444	2.735074449	0.031425781	0.263571628	yes	up	0	0	0.04	0	0.11	0.13	0.09	0.06	0.01	0.0975
ENSG00000253302	STAU2-AS1	STAU2 antisense RNA 1 [Source:HGNC Symbol;Acc:HGNC:44101]	0.09034985	-3.468333986	0.031496872	0.264131356	yes	down	0.1	0.03	0	0.03	0	0	0	0	0.04	0
ENSG00000248514		novel transcript	0.089925679	-3.475123043	0.031566149	0.264639148	yes	down	0	1.58	0	0	0	0	0	0	0.395	0
ENSG00000229491		novel transcript	0.089925679	-3.475123043	0.031566149	0.264639148	yes	down	0	0.68	0	0	0	0	0	0	0.17	0
ENSG00000256538		novel transcript	0.232116573	-2.107078563	0.031702846	0.265528298	yes	down	0.22	0.12	0.02	0.05	0	0.02	0	0.05	0.1025	0.0175
ENSG00000074966	TXK	TXK tyrosine kinase [Source:HGNC Symbol;Acc:HGNC:12434]	1.689601947	0.756683403	0.03172073	0.265641412	yes	up	0.35	0.13	0.54	0.75	1.11	1	0.68	0.52	0.4425	0.8275
ENSG00000261426		novel transcript, sense intronic to GABRG3	0.090187233	-3.470932965	0.031737474	0.265708273	yes	down	0.02	0.07	0	0	0	0	0	0	0.0225	0
ENSG00000159307	SCUBE1	signal peptide, CUB domain and EGF like domain containing 1 [Source:HGNC Symbol;Acc:HGNC:13441]	3.487446417	1.802171051	0.031765645	0.265907421	yes	up	0.01	0.01	0.01	0.01	0.04	0.03	0.01	0.03	0.01	0.0275
ENSG00000176593		novel transcript, antisense to ZNF606	0.451092521	-1.148504727	0.03182302	0.266167336	yes	down	0.22	0.32	0.27	0.38	0.3	0.12	0.07	0.15	0.2975	0.16
ENSG00000272092		novel transcript	0.440429934	-1.183015571	0.031857925	0.266349116	yes	down	0.5	0.67	1.12	0.34	0.27	0.5	0.35	0	0.6575	0.28
ENSG00000091986	CCDC80	coiled-coil domain containing 80 [Source:HGNC Symbol;Acc:HGNC:30649]	0.559106459	-0.838805082	0.031939597	0.266848051	yes	down	0.49	0.25	0.27	1.02	0.21	0.31	0.08	0.37	0.5075	0.2425
ENSG00000230585	PHBP12	prohibitin pseudogene 12 [Source:HGNC Symbol;Acc:HGNC:39291]	5.224494699	2.38529151	0.031962627	0.267003689	yes	up	0.11	0	0.09	0	0.31	0.11	0.53	0.33	0.05	0.32
ENSG00000177459	ERICH5	glutamate rich 5 [Source:HGNC Symbol;Acc:HGNC:26823]	0.090712013	-3.462562577	0.032081611	0.267776397	yes	down	0.14	0.1	0	0	0	0	0	0	0.06	0
ENSG00000277675		novel transcript	0.090712013	-3.462562577	0.032081611	0.267776397	yes	down	0.35	0.24	0	0	0	0	0	0	0.1475	0
ENSG00000285737	LINC02680	long intergenic non-protein coding RNA 2680 [Source:HGNC Symbol;Acc:HGNC:54174]	0.090878617	-3.459915316	0.032092723	0.267795451	yes	down	0.04	0.04	0	0.02	0	0	0	0	0.025	0
ENSG00000164742	ADCY1	adenylate cyclase 1 [Source:HGNC Symbol;Acc:HGNC:232]	3.866633327	1.95107796	0.032128582	0.268057801	yes	up	0	0	0.04	0.18	0.01	0.22	0.23	0.06	0.055	0.13
ENSG00000160999	SH2B2	SH2B adaptor protein 2 [Source:HGNC Symbol;Acc:HGNC:17381]	6.610593275	2.724779754	0.03221091	0.268596925	yes	up	0	0	0.03	0	0.09	0.06	0.42	0.03	0.0075	0.15
ENSG00000254791	FAR1-IT1	FAR1 intronic transcript 1 [Source:HGNC Symbol;Acc:HGNC:41485]	0.090975235	-3.458382322	0.03225442	0.268848875	yes	down	2.1	0.54	0	0	0	0	0	0	0.66	0
ENSG00000288052		novel transcript	0.091049953	-3.457197921	0.032256029	0.268825352	yes	down	0.09	0.09	0	0.04	0	0	0	0	0.055	0
ENSG00000184113	CLDN5	claudin 5 [Source:HGNC Symbol;Acc:HGNC:2047]	1.969535306	0.977855279	0.03236492	0.269547705	yes	up	0.35	0.11	0.33	0.17	0.51	0.45	0.21	0.73	0.24	0.475
ENSG00000226377		novel transcript	0.36362636	-1.459471309	0.032396503	0.269736682	yes	down	0.24	0.05	0.17	0.1	0.04	0.09	0.02	0.04	0.14	0.0475
ENSG00000154589	LY96	lymphocyte antigen 96 [Source:HGNC Symbol;Acc:HGNC:17156]	5.201331691	2.378881042	0.032417448	0.269874029	yes	up	0.2	0	0.3	0	0.95	1.22	0.19	0	0.125	0.59
ENSG00000230623		novel transcript, antisense to ZNF281	0.09123901	-3.454205395	0.03242772	0.269922501	yes	down	4.05	0	0	0	0	0	0	0	1.0125	0
ENSG00000249156	TAF11L12	TATA-box binding protein associated factor 11 like 12 [Source:HGNC Symbol;Acc:HGNC:53855]	0.09123901	-3.454205395	0.03242772	0.269922501	yes	down	0.36	0	0	0	0	0	0	0	0.09	0
ENSG00000266865		SMAD specific E3 ubiquitin protein ligase 2 (SMURF2) pseudogene	0.092508545	-3.434269549	0.032438108	0.269934894	yes	down	0	0	1.53	0.64	0	0	0	0	0.5425	0
ENSG00000266853	ITM2BP1	integral membrane protein 2B pseudogene 1 [Source:HGNC Symbol;Acc:HGNC:20919]	6.588963497	2.720051534	0.032508376	0.27037128	yes	up	0	0	0	0.14	0.43	0	0.43	0.45	0.035	0.3275
ENSG00000235574		coiled-coil domain containing 86 (CCDC86) pseudogene	0.09144909	-3.450887371	0.032573176	0.270873088	yes	down	0	0.23	0	0.14	0	0	0	0	0.0925	0
ENSG00000248893	FAM138E	family with sequence similarity 138 member E [Source:HGNC Symbol;Acc:HGNC:32335]	0.390561705	-1.356377597	0.032586001	0.270868346	yes	down	0.41	0.46	0.56	0.45	0.19	0.26	0	0.26	0.47	0.1775
ENSG00000213939		ribosomal protein S12 (RPS12) pseudogene	0.091572725	-3.448938234	0.032599248	0.270941334	yes	down	1.66	0	0	0.38	0	0	0	0	0.51	0
ENSG00000231407	GORAB-AS1	GORAB antisense RNA 1 [Source:HGNC Symbol;Acc:HGNC:54051]	0.19611212	-2.350249398	0.032666246	0.27127517	yes	down	0.46	0.24	0.79	1.29	0	0.47	0	0	0.695	0.1175
ENSG00000188015	S100A3	S100 calcium binding protein A3 [Source:HGNC Symbol;Acc:HGNC:10493]	0.091627531	-3.448075043	0.032693644	0.27142839	yes	down	0.25	0.26	0.16	0	0	0	0	0	0.1675	0
ENSG00000268650		novel transcript, antisense to PDE4C	0.091627531	-3.448075043	0.032693644	0.27142839	yes	down	3.08	0.79	1.25	0	0	0	0	0	1.28	0
ENSG00000247416		novel transcript, antisense to NCAM1	0.091706068	-3.446838994	0.03269739	0.271385205	yes	down	0	0.13	0.04	0.03	0	0	0	0	0.05	0
ENSG00000123360	PDE1B	phosphodiesterase 1B [Source:HGNC Symbol;Acc:HGNC:8775]	1.751202631	0.808346027	0.032707132	0.271391804	yes	up	0.07	0.18	0.25	0.45	0.19	0.64	0.32	0.48	0.2375	0.4075
ENSG00000243979		ribosomal protein L17 (RPL17) pseudogene	6.572715828	2.716489611	0.032727759	0.271488687	yes	up	0	0	0	0.19	0.38	0.61	0.78	0	0.0475	0.4425
ENSG00000259116		novel transcript, antisense to HSPA2 & ZBTB1	5.178572965	2.372554596	0.032881113	0.27253721	yes	up	0	0.07	0.06	0	0.19	0	0.57	0	0.0325	0.19
ENSG00000260128	ULK4P2	ULK4 pseudogene 2 [Source:HGNC Symbol;Acc:HGNC:15776]	0.344717437	-1.53651382	0.03291765	0.272728257	yes	down	0.95	1.23	0	1.14	0.24	0.01	0.44	0.41	0.83	0.275
ENSG00000111335	OAS2	2'-5'-oligoadenylate synthetase 2 [Source:HGNC Symbol;Acc:HGNC:8087]	0.091979336	-3.442546413	0.032922143	0.272728239	yes	down	0.07	0.02	0	0.04	0	0	0	0	0.0325	0
ENSG00000261392		novel transcript	0.091979336	-3.442546413	0.032922143	0.272728239	yes	down	0.24	0.13	0	0.23	0	0	0	0	0.15	0
ENSG00000273064		novel transcript	0.649230536	-0.623197238	0.032939158	0.272794684	yes	down	2.11	1.57	2.9	2.83	1.28	1.49	1.79	1.44	2.3525	1.5
ENSG00000113070	HBEGF	heparin binding EGF like growth factor [Source:HGNC Symbol;Acc:HGNC:3059]	0.402267406	-1.313773246	0.03296041	0.272896179	yes	down	0.43	0.12	0.29	0.19	0	0.14	0.06	0.15	0.2575	0.0875
ENSG00000239257	RPL23AP1	ribosomal protein L23a pseudogene 1 [Source:HGNC Symbol;Acc:HGNC:10318]	0.239064253	-2.06452967	0.033009036	0.273224202	yes	down	0.76	2.24	0.49	0.77	0.23	0.23	0.2	0.22	1.065	0.22
ENSG00000273199		novel transcript, antisense to MORC3	0.092131414	-3.440163038	0.033029098	0.273352964	yes	down	0.1	0.2	0.08	0.09	0	0	0	0	0.1175	0
ENSG00000286107		novel transcript	0.092158585	-3.439737627	0.033043319	0.273396061	yes	down	0.14	0	0.03	0	0	0	0	0	0.0425	0
ENSG00000271553		novel transcript	3.838995853	1.940729002	0.033055297	0.273420577	yes	up	0	0.07	0	0.2	0.13	0.35	0.34	0.29	0.0675	0.2775
ENSG00000158815	FGF17	fibroblast growth factor 17 [Source:HGNC Symbol;Acc:HGNC:3673]	2.173370052	1.119933838	0.033109886	0.273760138	yes	up	0.09	0.2	0.11	0.27	0.28	0.44	0.38	0.34	0.1675	0.36
ENSG00000224309	ANKRD30BP2	ankyrin repeat domain 30B pseudogene 2 [Source:HGNC Symbol;Acc:HGNC:16620]	0.092264513	-3.438080334	0.033116811	0.27378008	yes	down	0.05	0.07	0.02	0.02	0	0	0	0	0.04	0
ENSG00000164855	TMEM184A	transmembrane protein 184A [Source:HGNC Symbol;Acc:HGNC:28797]	2.505017787	1.324820848	0.033194852	0.274313107	yes	up	0.21	0.03	0.1	0.03	0.08	0.24	0.11	0.16	0.0925	0.1475
ENSG00000196684	HSH2D	hematopoietic SH2 domain containing [Source:HGNC Symbol;Acc:HGNC:24920]	0.45098867	-1.148836904	0.033276811	0.274765817	yes	down	0.6	0.52	0.33	0.31	0	0.31	0.42	0.3	0.44	0.2575
ENSG00000186648	CARMIL3	capping protein regulator and myosin 1 linker 3 [Source:HGNC Symbol;Acc:HGNC:20272]	0.09255048	-3.433615714	0.03331216	0.274982834	yes	down	0.01	0.03	0.03	0	0	0	0	0	0.0175	0
ENSG00000254186		novel transcript	0.092637427	-3.43226101	0.033366416	0.275318318	yes	down	0	0.29	0.22	0.26	0	0	0	0	0.1925	0
ENSG00000183111	ARHGEF37	Rho guanine nucleotide exchange factor 37 [Source:HGNC Symbol;Acc:HGNC:34430]	0.092637427	-3.43226101	0.033366416	0.275318318	yes	down	0	0.28	0.01	0.02	0	0	0	0	0.0775	0
ENSG00000198633	ZNF534	zinc finger protein 534 [Source:HGNC Symbol;Acc:HGNC:26337]	0.092637427	-3.43226101	0.033366416	0.275318318	yes	down	0	0.18	0.07	0.16	0	0	0	0	0.1025	0
ENSG00000237693	IRGM	immunity related GTPase M [Source:HGNC Symbol;Acc:HGNC:29597]	0.092664629	-3.431837433	0.033380675	0.275323629	yes	down	0.13	0	0.04	0.04	0	0	0	0	0.0525	0
ENSG00000138741	TRPC3	transient receptor potential cation channel subfamily C member 3 [Source:HGNC Symbol;Acc:HGNC:12335]	0.451245352	-1.148016023	0.033396676	0.275380722	yes	down	0.03	0.17	0.03	0.29	0.02	0.09	0.3	0.04	0.13	0.1125
ENSG00000172346	CSDC2	cold shock domain containing C2 [Source:HGNC Symbol;Acc:HGNC:30359]	6.518790342	2.704604276	0.033497343	0.27613573	yes	up	0	0.03	0	0	0.03	0.42	0.1	0	0.0075	0.1375
ENSG00000113248	PCDHB15	protocadherin beta 15 [Source:HGNC Symbol;Acc:HGNC:8686]	6.517987738	2.704426638	0.033509472	0.276198184	yes	up	0	0.02	0	0	0.03	0.37	0.05	0.02	0.005	0.1175
ENSG00000260714		thyroid hormone receptor interactor 11 (TRIP11) pseudogene	0.09300984	-3.426472836	0.033559616	0.276498782	yes	down	0.03	0	0.01	0.03	0	0	0	0	0.0175	0
ENSG00000280319		novel transcript	0.092991964	-3.426750136	0.033597333	0.276771945	yes	down	0	0.25	0	0.88	0	0	0	0	0.2825	0
ENSG00000236384	LINC00479	long intergenic non-protein coding RNA 479 [Source:HGNC Symbol;Acc:HGNC:19727]	0.092991964	-3.426750136	0.033597333	0.276771945	yes	down	0	0.21	0	0.13	0	0	0	0	0.085	0
ENSG00000272525	BTF3-DT	BTF3 divergent transcript [Source:HGNC Symbol;Acc:HGNC:55211]	0.609611197	-0.714038693	0.033634947	0.277006578	yes	down	1.99	2.84	2.25	3.38	1.42	1.98	1.57	1.25	2.615	1.555
ENSG00000236801	RPL24P8	RPL24 pseudogene 8 [Source:HGNC Symbol;Acc:HGNC:36409]	0.093085562	-3.425298771	0.033665366	0.277219462	yes	down	0.84	0	0.48	0	0	0	0	0	0.33	0
ENSG00000273137		novel transcript, antisense to SELO	0.338378115	-1.56329183	0.033670605	0.277224972	yes	down	0.8	0.68	0.69	1.44	0.33	0.32	0.32	0.18	0.9025	0.2875
ENSG00000275120		novel transcript, antisense to ZSCAN2	0.216556089	-2.207187356	0.033755277	0.277658321	yes	down	0.05	0.05	0.08	0.08	0.02	0	0	0.02	0.065	0.01
ENSG00000260172	LINC01413	long intergenic non-protein coding RNA 1413 [Source:HGNC Symbol;Acc:HGNC:50705]	0.093260063	-3.422596786	0.033774438	0.277740614	yes	down	0.16	0	0	0.6	0	0	0	0	0.19	0
ENSG00000232491	SAPCD2P3	suppressor APC domain containing 2 pseudogene 3 [Source:HGNC Symbol;Acc:HGNC:51279]	0.093326673	-3.421566725	0.033828379	0.278033438	yes	down	0.1	0.11	0.18	0.1	0	0	0	0	0.1225	0
ENSG00000273598		postmeiotic segregation increased 2 pseudogene 6	0.093798111	-3.414297316	0.033882886	0.278443696	yes	down	0	0	0.3	0.47	0	0	0	0	0.1925	0
ENSG00000259635		novel transcript, antisense OAZ2	0.093480816	-3.419185866	0.033937098	0.27881367	yes	down	0	0.09	0.12	0	0	0	0	0	0.0525	0
ENSG00000235910	APOA1-AS	APOA1 antisense RNA [Source:HGNC Symbol;Acc:HGNC:40079]	4.327900251	2.113667249	0.033968274	0.278994225	yes	up	0	0.09	0.07	0.19	0.75	0.37	0.34	0.59	0.0875	0.5125
ENSG00000207955		novel transcript	0.093595558	-3.417416132	0.034006163	0.279192028	yes	down	0.1	0	0.08	0.05	0	0	0	0	0.0575	0
ENSG00000177553	C1orf167-AS1	C1orf167 antisense RNA 1 [Source:HGNC Symbol;Acc:HGNC:41091]	0.093595558	-3.417416132	0.034006163	0.279192028	yes	down	0.07	0	0.06	0.04	0	0	0	0	0.0425	0
ENSG00000261117		novel transcript	0.093595558	-3.417416132	0.034006163	0.279192028	yes	down	0.22	0	0.19	0.1	0	0	0	0	0.1275	0
ENSG00000237781	ADAMTSL4-AS2	ADAMTSL4 antisense RNA 2 [Source:HGNC Symbol;Acc:HGNC:40895]	6.481653393	2.696361874	0.034024796	0.279231633	yes	up	0	0.15	0	0	0.57	0.3	0.43	0	0.0375	0.325
ENSG00000228600	POLR2CP1	RNA polymerase II subunit C pseudogene 1 [Source:HGNC Symbol;Acc:HGNC:9190]	1.721182522	0.783400096	0.034041124	0.279327841	yes	up	0.95	0.99	0.93	2.01	3.18	2.02	1.27	1.8	1.22	2.0675
ENSG00000288234		novel transcript, antisense to NRARP	0.093683074	-3.416067779	0.034060937	0.279452625	yes	down	0.4	0	0.34	1.12	0	0	0	0	0.465	0
ENSG00000092758	COL9A3	collagen type IX alpha 3 chain [Source:HGNC Symbol;Acc:HGNC:2219]	0.605089744	-0.724778964	0.034096848	0.279709426	yes	down	1.63	2.36	1.63	1.76	1.09	0.67	1.15	1.72	1.845	1.1575
ENSG00000281005	LINC00921	long intergenic non-protein coding RNA 921 [Source:HGNC Symbol;Acc:HGNC:26830]	0.65103326	-0.619196846	0.034107771	0.279761199	yes	down	0.68	0.54	0.9	0.95	0.37	0.67	0.4	0.53	0.7675	0.4925
ENSG00000181359	HSP90AA6P	heat shock protein 90 alpha family class A member 6, pseudogene [Source:HGNC Symbol;Acc:HGNC:32536]	0.094019897	-3.410890087	0.034293802	0.28109704	yes	down	0.25	0	0.33	0	0	0	0	0	0.145	0
ENSG00000220685		transcription factor B2, mitochondrial (TFB2M) pseudogene	2.068728113	1.048744048	0.034324949	0.281276334	yes	up	0.13	0.4	0.39	0.43	0.93	0.38	1.14	0.33	0.3375	0.695
ENSG00000235535	TRDN-AS1	TRDN antisense RNA 1 [Source:HGNC Symbol;Acc:HGNC:40592]	10.43980375	3.384022686	0.034392985	0.281757734	yes	up	0	0	0	0	3.59	1.99	0.82	0.43	0	1.7075
ENSG00000226493	RPL26P27	ribosomal protein L26 pseudogene 27 [Source:HGNC Symbol;Acc:HGNC:36735]	0.094195457	-3.408198708	0.034403823	0.281694362	yes	down	0	0	0.29	1.25	0	0	0	0	0.385	0
ENSG00000237529		novel transcript	0.382950641	-1.384769642	0.034439076	0.281906913	yes	down	0.57	0.52	0.28	0.62	0.15	0.14	0.07	0.36	0.4975	0.18
ENSG00000236065		novel transcript	0.267691206	-1.901358351	0.0344637	0.281994321	yes	down	0.13	0.18	0.04	0.36	0.04	0	0.04	0.09	0.1775	0.0425
ENSG00000161509	GRIN2C	glutamate ionotropic receptor NMDA type subunit 2C [Source:HGNC Symbol;Acc:HGNC:4587]	1.690544104	0.757487655	0.034494373	0.282207231	yes	up	0.47	0.14	0.08	0.23	0.45	0.23	0.2	0.59	0.23	0.3675
ENSG00000274997	H2AC12	H2A clustered histone 12 [Source:HGNC Symbol;Acc:HGNC:13671]	0.518243893	-0.948296884	0.034522791	0.282363566	yes	down	6.38	3.15	3.63	2.83	1.43	2.18	1.73	2.67	3.9975	2.0025
ENSG00000222017		novel transcript, antisense to BOLL	0.643867057	-0.635165257	0.034542984	0.282490641	yes	down	3.06	4.12	4.19	2.16	2.31	2.42	1.61	2.18	3.3825	2.13
ENSG00000288597		novel transcript	0.602818051	-0.730205477	0.034635718	0.283172664	yes	down	10.87	25.5	7.26	6.67	5.21	10.87	12.93	9.71	12.575	9.68
ENSG00000287357		novel transcript	0.094533818	-3.403025673	0.034638007	0.283153218	yes	down	0.03	0	0.07	0.03	0	0	0	0	0.0325	0
ENSG00000228546	PMS2P12	PMS1 homolog 2, mismatch repair system component pseudogene 12 [Source:HGNC Symbol;Acc:HGNC:13641]	10.40199988	3.378789022	0.034673557	0.28332929	yes	up	0	0	0	0	0.47	0	1.7	0	0	0.5425
ENSG00000130413	STK33	serine/threonine kinase 33 [Source:HGNC Symbol;Acc:HGNC:14568]	1.683465857	0.751434462	0.034727658	0.28369494	yes	up	0.18	0.15	0.09	0.2	0.32	0.18	0.23	0.29	0.155	0.255
ENSG00000213461	RPL32P15	ribosomal protein L32 pseudogene 15 [Source:HGNC Symbol;Acc:HGNC:36119]	3.790400969	1.922350472	0.034742201	0.283775532	yes	up	1.26	0	0	0.39	2.36	0.43	2.37	1.21	0.4125	1.5925
ENSG00000267023	LRRC37A16P	leucine rich repeat containing 37 member A16, pseudogene [Source:HGNC Symbol;Acc:HGNC:43820]	0.289672012	-1.787507796	0.034846492	0.284359375	yes	down	0.1	0.09	0.07	0.06	0.06	0	0	0.02	0.08	0.02
ENSG00000273102		novel transcript	0.416961433	-1.262014146	0.034933581	0.284955055	yes	down	0.91	0.76	1.72	2.36	0.52	1.28	0.17	0.36	1.4375	0.5825
ENSG00000284829		novel transcript	10.3684868	3.374133454	0.035155344	0.286302028	yes	up	0	0	0	0	0	3.92	0	0	0	0.98
ENSG00000274630		novel transcript, antisense to ACLY	0.47763947	-1.066006035	0.03523061	0.286722528	yes	down	90.98	207	116.76	228.09	66.95	32.38	192.71	60.06	160.7075	88.025
ENSG00000213203	GIMAP1	GTPase, IMAP family member 1 [Source:HGNC Symbol;Acc:HGNC:23237]	0.094317215	-3.406335063	0.035235937	0.286727414	yes	down	0.01	0.03	0	0.03	0	0	0	0	0.0175	0
ENSG00000136305	CIDEB	cell death inducing DFFA like effector b [Source:HGNC Symbol;Acc:HGNC:1977]	8.277059523	3.049118332	0.035249477	0.286760668	yes	up	0	0.09	0	0	0	0	0	0.3	0.0225	0.075
ENSG00000250210		septin 14 pseudogene 9	10.35100949	3.371699569	0.035262146	0.286748365	yes	up	0	0	0	0	0	26.5	13.31	0	0	9.9525
ENSG00000188305	PEAK3	PEAK family member 3 [Source:HGNC Symbol;Acc:HGNC:24793]	0.38497741	-1.3771543	0.035271517	0.286786126	yes	down	0.16	0.14	0.13	0.29	0.05	0.08	0.05	0.08	0.18	0.065
ENSG00000279717		TEC	0.095479361	-3.388667277	0.035276143	0.286785305	yes	down	0	0	0.09	0.02	0	0	0	0	0.0275	0
ENSG00000276663		novel transcript, antisense to ARL2BP	0.095479361	-3.388667277	0.035276143	0.286785305	yes	down	0	0	0.68	0.18	0	0	0	0	0.215	0
ENSG00000211751	TRBC1	T cell receptor beta constant 1 [Source:HGNC Symbol;Acc:HGNC:12156]	0.436578429	-1.195687246	0.035319631	0.286946577	yes	down	1.2	0.63	1.56	0.79	0.46	0.36	0.58	0.36	1.045	0.44
ENSG00000183397	C19orf71	chromosome 19 open reading frame 71 [Source:HGNC Symbol;Acc:HGNC:34496]	2.323301764	1.216176552	0.035393074	0.287504744	yes	up	1.03	0.16	0.53	0.48	1.43	1.53	1.03	1.11	0.55	1.275
ENSG00000226652	PSMD10P2	proteasome 26S subunit, non-ATPase, 10 pseudogene 2 [Source:HGNC Symbol;Acc:HGNC:30151]	0.095648587	-3.38611253	0.035439727	0.287729602	yes	down	0	0	0.37	0.1	0	0	0	0	0.1175	0
ENSG00000224083	MTCO1P11	MT-CO1 pseudogene 11 [Source:HGNC Symbol;Acc:HGNC:52013]	2.273260008	1.184762704	0.035534919	0.288463843	yes	up	0.24	0.35	0.08	0.09	0.59	0.47	0.46	0.15	0.19	0.4175
ENSG00000233056	ERVH48-1	endogenous retrovirus group 48 member 1 [Source:HGNC Symbol;Acc:HGNC:17216]	0.353237236	-1.501290663	0.035555055	0.288550083	yes	down	0.07	0.1	0.19	0.2	0.02	0.07	0.07	0.02	0.14	0.045
ENSG00000259192		CTD (carboxy-terminal domain, RNA polymerase II, polypeptide A) small phosphatase 2 (CTDSP2) pseudogene	0.095910451	-3.382168158	0.035569593	0.288629457	yes	down	0	0	0.5	0	0	0	0	0	0.125	0
ENSG00000286949		novel transcript	0.095910451	-3.382168158	0.035569593	0.288629457	yes	down	0	0	0.3	0	0	0	0	0	0.075	0
ENSG00000263280		novel transcript	0.42660393	-1.22903084	0.035744266	0.28985298	yes	down	1.19	1.38	0.85	0.99	0.14	0.6	0.39	0.63	1.1025	0.44
ENSG00000167612	ANKRD33	ankyrin repeat domain 33 [Source:HGNC Symbol;Acc:HGNC:13788]	2.89396222	1.533046088	0.035766354	0.289915837	yes	up	0.02	0.07	0.1	0.12	0.17	0.41	0.15	0.06	0.0775	0.1975
ENSG00000261801	LOXL1-AS1	LOXL1 antisense RNA 1 [Source:HGNC Symbol;Acc:HGNC:44169]	0.294988004	-1.76127181	0.035798102	0.290018173	yes	down	0.14	0.44	0.26	0	0.12	0.06	0.09	0	0.21	0.0675
ENSG00000213760	ATP6V1G2	ATPase H+ transporting V1 subunit G2 [Source:HGNC Symbol;Acc:HGNC:862]	0.334362776	-1.580513851	0.035804996	0.289957855	yes	down	0.46	0.35	0.33	0.25	0.17	0	0.15	0.36	0.3475	0.17
ENSG00000012171	SEMA3B	semaphorin 3B [Source:HGNC Symbol;Acc:HGNC:10724]	0.605620099	-0.723515008	0.035811823	0.289974426	yes	down	0.86	0.7	0.97	0.76	0.21	1.16	0.49	0.34	0.8225	0.55
ENSG00000241322	CDRT1	CMT1A duplicated region transcript 1 [Source:HGNC Symbol;Acc:HGNC:14379]	2.651963345	1.407060835	0.035882638	0.290431534	yes	up	0.2	0.05	0.04	0.21	0.38	0.12	0.59	0.01	0.125	0.275
ENSG00000250510	GPR162	G protein-coupled receptor 162 [Source:HGNC Symbol;Acc:HGNC:16693]	0.426881385	-1.228092842	0.035883569	0.290400323	yes	down	0.22	0.38	0.41	0.59	0.2	0.12	0.05	0.14	0.4	0.1275
ENSG00000248685	LINC02484	long intergenic non-protein coding RNA 2484 [Source:HGNC Symbol;Acc:HGNC:53459]	0.653742359	-0.613205916	0.036078991	0.291748319	yes	down	2.36	2.55	2.11	2.74	1.27	1.02	1.94	1.9	2.44	1.5325
ENSG00000170006	TMEM154	transmembrane protein 154 [Source:HGNC Symbol;Acc:HGNC:26489]	0.479532722	-1.060298831	0.036200427	0.292574304	yes	down	0.08	0.07	0.03	0.07	0.27	0.07	0.02	0.03	0.0625	0.0975
ENSG00000267106	ZNF561-AS1	ZNF561 antisense RNA 1 (head to head) [Source:HGNC Symbol;Acc:HGNC:27613]	1.612202942	0.68903336	0.03621193	0.292628281	yes	up	0.42	0.43	0.47	0.54	0.7	1.86	0.54	0.54	0.465	0.91
ENSG00000035664	DAPK2	death associated protein kinase 2 [Source:HGNC Symbol;Acc:HGNC:2675]	1.544918367	0.627530608	0.036216148	0.292623385	yes	up	0.34	0.42	0.81	0.46	0.8	0.5	1.06	1.23	0.5075	0.8975
ENSG00000259856	RAB43P1	RAB43 pseudogene 1 [Source:HGNC Symbol;Acc:HGNC:33153]	0.527187391	-0.923612229	0.036487802	0.294308741	yes	down	1.61	2.77	3.09	2.27	0	0	3.61	1.35	2.435	1.24
ENSG00000171136	RLN3	relaxin 3 [Source:HGNC Symbol;Acc:HGNC:17135]	2.647903374	1.404850477	0.036492232	0.294305338	yes	up	0.08	0.15	0.25	0.2	0.28	0.72	0.42	0.59	0.17	0.5025
ENSG00000175544	CABP4	calcium binding protein 4 [Source:HGNC Symbol;Acc:HGNC:1386]	0.348599845	-1.520356168	0.036558178	0.294758815	yes	down	0.13	0.05	0.14	0.05	0.02	0.03	0.05	0.03	0.0925	0.0325
ENSG00000164128	NPY1R	neuropeptide Y receptor Y1 [Source:HGNC Symbol;Acc:HGNC:7956]	2.490570806	1.316476427	0.036631746	0.295312719	yes	up	0.18	0.29	0.1	0.14	0.13	0.07	0.31	0.21	0.1775	0.18
ENSG00000227799	CDPF1P1	CDPF1 pseudogene 1 [Source:HGNC Symbol;Acc:HGNC:54763]	0.631411886	-0.663346675	0.036765875	0.296118563	yes	down	1.07	1.49	1.2	1.06	0.54	0.96	0.95	0.52	1.205	0.7425
ENSG00000284733	OR4F29	olfactory receptor family 4 subfamily F member 29 [Source:HGNC Symbol;Acc:HGNC:31275]	10.18267192	3.348044267	0.036842234	0.2966548	yes	up	0	0	0	0	0.09	0	0.09	0.21	0	0.0975
ENSG00000228022	HCG20	HLA complex group 20 [Source:HGNC Symbol;Acc:HGNC:31334]	0.336492938	-1.571351867	0.036863886	0.296789749	yes	down	0.46	0.14	0.46	0.26	0.16	0.08	0.11	0.08	0.33	0.1075
ENSG00000231086	TSSK1A	testis specific serine kinase 1A (pseudogene) [Source:HGNC Symbol;Acc:HGNC:11400]	0.325564999	-1.61898249	0.036926565	0.297254926	yes	down	1.04	0.47	0.32	0.67	0.23	0.35	0	0.17	0.625	0.1875
ENSG00000278952		TEC	2.183396338	1.126574037	0.036931144	0.297252343	yes	up	0.11	0.46	0.1	1.25	0.74	0.99	1.29	1.12	0.48	1.035
ENSG00000183049	CAMK1D	calcium/calmodulin dependent protein kinase ID [Source:HGNC Symbol;Acc:HGNC:19341]	2.53200558	1.340280584	0.036980695	0.297611688	yes	up	0.04	0.01	0.08	0.02	0.05	0.08	0.17	0.17	0.0375	0.1175
ENSG00000288262		novel zinc finger protein pseudogene	2.07842735	1.055492321	0.036990688	0.297613139	yes	up	0.15	0.15	0.13	0.07	0.26	0.26	0.22	0.28	0.125	0.255
ENSG00000210184	MT-TS2	mitochondrially encoded tRNA-Ser (AGU/C) 2 [Source:HGNC Symbol;Acc:HGNC:7498]	8.911153203	3.155612145	0.036993725	0.297598105	yes	up	0	0	0	0	0	0	0	0	0	0
ENSG00000287130		novel transcript	0.392179306	-1.350414684	0.037021525	0.297782262	yes	down	0.18	0.4	0.15	0.18	0.03	0.12	0.19	0	0.2275	0.085
ENSG00000270249		novel protein	10.12456967	3.339788685	0.037156892	0.298435809	yes	up	0	0	0	0	0.23	0.17	0	0	0	0.1
ENSG00000273747		novel transcript, antisense to BTBD1	3.034975685	1.601684958	0.037161214	0.298431014	yes	up	0	0.15	0.49	0.26	0.67	0.56	1.09	0.56	0.225	0.72
ENSG00000251504	LINC01099	long intergenic non-protein coding RNA 1099 [Source:HGNC Symbol;Acc:HGNC:49222]	0.419337704	-1.25381554	0.03719168	0.298478118	yes	down	0.97	1.38	1.1	0.45	0.46	0.72	0.24	0.19	0.975	0.4025
ENSG00000142621	FHAD1	forkhead associated phosphopeptide binding domain 1 [Source:HGNC Symbol;Acc:HGNC:29408]	1.576430744	0.656661791	0.037245805	0.29883342	yes	up	0.29	0.65	0.49	0.67	0.44	0.39	0.82	0.63	0.525	0.57
ENSG00000130997	POLN	DNA polymerase nu [Source:HGNC Symbol;Acc:HGNC:18870]	2.242991077	1.165423881	0.037309394	0.299224889	yes	up	0.23	0.37	0.84	0.07	0.13	1	0.12	0.5	0.3775	0.4375
ENSG00000105894	PTN	pleiotrophin [Source:HGNC Symbol;Acc:HGNC:9630]	0.419688081	-1.252610605	0.037425993	0.300080682	yes	down	0.34	0.51	0.26	0.46	0.09	0.15	0.19	0.2	0.3925	0.1575
ENSG00000226695	ANKRD20A10P	ankyrin repeat domain 20 family member A10, pseudogene [Source:HGNC Symbol;Acc:HGNC:39707]	0.137427087	-2.863261708	0.037516059	0.300604173	yes	down	0	0	0.12	0.23	0	0	0	0.03	0.0875	0.0075
ENSG00000127720	METTL25	methyltransferase like 25 [Source:HGNC Symbol;Acc:HGNC:26228]	1.502253219	0.587128014	0.037601305	0.30124743	yes	up	1.64	1.01	1.23	1.15	1.41	2.05	0.93	1.6	1.2575	1.4975
ENSG00000158014	SLC30A2	solute carrier family 30 member 2 [Source:HGNC Symbol;Acc:HGNC:11013]	0.554854976	-0.849817355	0.03764714	0.301455395	yes	down	0.2	0.32	0.42	0.28	0.26	0.25	0.21	0.14	0.305	0.215
ENSG00000262660		novel protein	0.198038801	-2.336144978	0.037737771	0.302101368	yes	down	0	0	0.22	0.18	0.06	0	0	0	0.1	0.015
ENSG00000249435		FSHD region gene 2 (FRG2) pseudogene	9.829474965	3.297114358	0.037828666	0.3027491	yes	up	0	0	0	0.02	0.05	0	0	1.28	0.005	0.3325
ENSG00000139351	SYCP3	synaptonemal complex protein 3 [Source:HGNC Symbol;Acc:HGNC:18130]	0.546448801	-0.871841765	0.037843505	0.302787967	yes	down	0.26	0.24	0.28	0.47	0.12	0.2	0.16	0.13	0.3125	0.1525
ENSG00000203772	SPRN	shadow of prion protein [Source:HGNC Symbol;Acc:HGNC:16871]	2.014854071	1.010675353	0.037883757	0.303030095	yes	up	0.14	0.09	0.17	0.06	0.21	0.14	0.32	0.26	0.115	0.2325
ENSG00000237611	Metazoa_SRP	Metazoan signal recognition particle RNA [Source:RFAM;Acc:RF00017]	0.096835608	-3.368318544	0.037996556	0.30385224	yes	down	7.43	4.17	0	0	0	0	0	0	2.9	0
ENSG00000260898	ADPGK-AS1	ADPGK antisense RNA 1 [Source:HGNC Symbol;Acc:HGNC:44144]	3.358423977	1.747784372	0.038081097	0.304488157	yes	up	0	0	0.07	0.05	0.05	0.07	0.12	0.18	0.03	0.105
ENSG00000232149	FERP1	FER tyrosine kinase pseudogene 1 [Source:HGNC Symbol;Acc:HGNC:26443]	0.653878813	-0.612904818	0.038123025	0.304702922	yes	down	3.88	4.13	2.54	1.97	1.89	2.54	2.02	1.49	3.13	1.985
ENSG00000011347	SYT7	synaptotagmin 7 [Source:HGNC Symbol;Acc:HGNC:11514]	1.592197882	0.671019649	0.038150816	0.304884875	yes	up	0.47	0.49	0.42	0.25	0.41	0.4	0.39	1.22	0.4075	0.605
ENSG00000139289	PHLDA1	pleckstrin homology like domain family A member 1 [Source:HGNC Symbol;Acc:HGNC:8933]	1.592445576	0.671244067	0.038155572	0.304882721	yes	up	0.13	0.19	0.18	0.11	0.34	0.24	0.15	0.23	0.1525	0.24
ENSG00000215397	SCRT2	scratch family transcriptional repressor 2 [Source:HGNC Symbol;Acc:HGNC:15952]	0.458025114	-1.126501391	0.038244675	0.305514214	yes	down	0.29	0.21	0.14	0.13	0.16	0.1	0.04	0.04	0.1925	0.085
ENSG00000206127	GOLGA8O	golgin A8 family member O [Source:HGNC Symbol;Acc:HGNC:44406]	0.482177181	-1.052364718	0.038306122	0.305924507	yes	down	0.14	0.15	0.02	0.22	0.05	0.07	0.08	0.06	0.1325	0.065
ENSG00000277511		novel transcript	0.62423865	-0.67983041	0.03845477	0.306788556	yes	down	1.2	2.4	3.03	2.07	0.86	1.1	0.88	2.53	2.175	1.3425
ENSG00000199744	SNORD36A	small nucleolar RNA, C/D box 36A [Source:HGNC Symbol;Acc:HGNC:10163]	0.098310751	-3.346507002	0.038573304	0.307612842	yes	down	0	0	0	0	0	0	0	0	0	0
ENSG00000269846		novel transcript, antisense to RBL1	0.510966653	-0.968698953	0.038596363	0.307756276	yes	down	0.48	0.51	0.89	0.66	0.15	0.37	0.32	0.44	0.635	0.32
ENSG00000272983		novel transcript	0.490390759	-1.027996301	0.038611558	0.307836978	yes	down	0.06	0.11	0.09	0.12	0.05	0.03	0.05	0.05	0.095	0.045
ENSG00000273576		novel transcript	1.692421973	0.759089322	0.038645924	0.308030004	yes	up	1.5	2.73	1.05	1.39	3.46	2.38	3.59	1.49	1.6675	2.73
ENSG00000177238	TRIM72	tripartite motif containing 72 [Source:HGNC Symbol;Acc:HGNC:32671]	0.339333592	-1.559223841	0.038680122	0.308262074	yes	down	0.02	0.05	0.04	0.04	0	0.01	0.02	0.02	0.0375	0.0125
ENSG00000253895	IGHVII-44-2	immunoglobulin heavy variable (II)-44-2 (pseudogene) [Source:HGNC Symbol;Acc:HGNC:5681]	0.097695236	-3.355567983	0.038709233	0.308453557	yes	down	9.32	0	0	0	0	0	0	0	2.33	0
ENSG00000265485	LINC01915	long intergenic non-protein coding RNA 1915 [Source:HGNC Symbol;Acc:HGNC:52734]	0.098623956	-3.34191806	0.038744159	0.308650776	yes	down	0	0.02	0.05	0.02	0	0	0	0	0.0225	0
ENSG00000219435	CATSPERZ	catsper channel auxiliary subunit zeta [Source:HGNC Symbol;Acc:HGNC:19231]	0.612295713	-0.707699513	0.038754619	0.308693567	yes	down	2.48	3.72	4.07	1.48	2.68	0.97	1.61	0.87	2.9375	1.5325
ENSG00000277007		novel transcript	1.611611965	0.688504421	0.038764692	0.308733268	yes	up	0.38	0.37	0.29	0.31	0.42	0.5	0.63	0.6	0.3375	0.5375
ENSG00000264278	ZNF236-DT	ZNF236 divergent transcript [Source:HGNC Symbol;Acc:HGNC:53779]	0.355354714	-1.492668258	0.038863288	0.309234328	yes	down	0.75	0.36	0.2	0.05	0.22	0.23	0	0	0.34	0.1125
ENSG00000117266	CDK18	cyclin dependent kinase 18 [Source:HGNC Symbol;Acc:HGNC:8751]	0.300829561	-1.732981754	0.038877277	0.30930507	yes	down	0.07	0.13	0.58	0.19	0	0.17	0.24	0.08	0.2425	0.1225
ENSG00000277870	FAM230A	family with sequence similarity 230 member A [Source:HGNC Symbol;Acc:HGNC:45045]	7.800165895	2.963504808	0.038901973	0.309460961	yes	up	0	0	0.01	0	0.23	0.38	0.26	0	0.0025	0.2175
ENSG00000281183	NPTN-IT1	NPTN intronic transcript 1 [Source:HGNC Symbol;Acc:HGNC:45091]	1.508980706	0.59357436	0.038926024	0.309571095	yes	up	0.56	0.71	0.44	0.59	0.83	0.79	0.96	0.82	0.575	0.85
ENSG00000180720	CHRM4	cholinergic receptor muscarinic 4 [Source:HGNC Symbol;Acc:HGNC:1953]	0.3730423	-1.422588865	0.038991394	0.310009687	yes	down	0.06	0.2	0.12	0.2	0.07	0.19	0.02	0.04	0.145	0.08
ENSG00000173991	TCAP	titin-cap [Source:HGNC Symbol;Acc:HGNC:11610]	1.745275049	0.803454418	0.038994835	0.30999642	yes	up	0.63	0.76	0.77	1.07	2.05	1.18	1.29	0.91	0.8075	1.3575
ENSG00000269791	SSX4B	SSX family member 4B [Source:HGNC Symbol;Acc:HGNC:16880]	0.132115878	-2.920124235	0.039077537	0.310572475	yes	down	0.12	0	0.09	0.22	0	0.04	0	0	0.1075	0.01
ENSG00000126895	AVPR2	arginine vasopressin receptor 2 [Source:HGNC Symbol;Acc:HGNC:897]	1.664471707	0.735064348	0.039207114	0.311439095	yes	up	0.69	0.45	0.52	0.67	0.92	0.96	1.02	0.78	0.5825	0.92
ENSG00000143921	ABCG8	ATP binding cassette subfamily G member 8 [Source:HGNC Symbol;Acc:HGNC:13887]	6.265284369	2.647379992	0.039286701	0.311826299	yes	up	0	0	0.01	0	0.03	0.02	0	0.03	0.0025	0.02
ENSG00000288698		novel protein	0.310901534	-1.685470359	0.039288682	0.311801231	yes	down	0	0.11	0.14	0.13	0	0.11	0	0	0.095	0.0275
ENSG00000279841		novel transcript	2.730419836	1.4491228	0.039370795	0.312289477	yes	up	0.04	0.08	0.16	0.04	0.15	0.3	0.19	0.27	0.08	0.2275
ENSG00000228836	CT45A5	cancer/testis antigen family 45 member A5 [Source:HGNC Symbol;Acc:HGNC:33270]	0.098469012	-3.344186404	0.039487235	0.313131189	yes	down	0.39	0	0	0	0	0	0	0	0.0975	0
ENSG00000228966	HOMER2P1	HOMER2 pseudogene 1 [Source:HGNC Symbol;Acc:HGNC:20336]	2.727992577	1.447839719	0.039534942	0.313427561	yes	up	0.26	0	0.22	0.24	0.33	0.17	0.66	0.87	0.18	0.5075
ENSG00000259039		novel transcript, antisense to SLC35F4	0.160880356	-2.63593992	0.039681949	0.314469728	yes	down	0.1	0.56	0.04	0.25	0.13	0	0	0	0.2375	0.0325
ENSG00000259687	LINC01220	long intergenic non-protein coding RNA 1220 [Source:HGNC Symbol;Acc:HGNC:49664]	0.275800935	-1.858300749	0.039727998	0.314629147	yes	down	0.44	0.51	0.15	0.33	0.08	0.09	0	0.18	0.3575	0.0875
ENSG00000261670		novel transcript	0.161523601	-2.630183114	0.039739387	0.314637194	yes	down	0.06	0.01	0.01	0.04	0	0.01	0	0	0.03	0.0025
ENSG00000279945		novel transcript	9.874603059	3.303722756	0.039843368	0.315295863	yes	up	0	0	0	0	0	1.02	0	0	0	0.255
ENSG00000213399	RPS2P17	ribosomal protein S2 pseudogene 17 [Source:HGNC Symbol;Acc:HGNC:35764]	9.855008498	3.300857115	0.039915293	0.315741472	yes	up	0	0	0	0	0.14	0.34	0	0	0	0.12
ENSG00000238084		succinate dehydrogenase complex, subunit D, integral membrane protein (SDHD) pseudogene	0.099242407	-3.332899466	0.040039009	0.316596249	yes	down	0.49	0.37	0.15	0.23	0	0	0	0	0.31	0
ENSG00000121380	BCL2L14	BCL2 like 14 [Source:HGNC Symbol;Acc:HGNC:16657]	0.098668338	-3.341268977	0.040056943	0.316696782	yes	down	0.03	0.24	0	0	0	0	0	0	0.0675	0
ENSG00000272256		novel transcript, antisense to TMEM66	0.099888584	-3.323536385	0.040132218	0.317209234	yes	down	0	0	0	0.58	0	0	0	0	0.145	0
ENSG00000257069	KCNK4-TEX40	KCNK4-TEX40 readthrough [Source:NCBI gene (formerly Entrezgene);Acc:106780802]	0.498380558	-1.004680305	0.040133964	0.31718171	yes	down	1.49	1.5	2.1	1.82	0	1.19	1.76	0.4	1.7275	0.8375
ENSG00000005073	HOXA11	homeobox A11 [Source:HGNC Symbol;Acc:HGNC:5101]	0.477875095	-1.065294513	0.040147543	0.317247691	yes	down	0.2	0.36	0.25	0.26	0.09	0.16	0.19	0.16	0.2675	0.15
ENSG00000099338	CATSPERG	cation channel sperm associated auxiliary subunit gamma [Source:HGNC Symbol;Acc:HGNC:25243]	2.983148396	1.576835746	0.040157072	0.317281662	yes	up	0.08	0.42	0.13	0.02	0.17	0.13	1.23	0.83	0.1625	0.59
ENSG00000179428	IL6-AS1	IL6 antisense RNA 1 [Source:HGNC Symbol;Acc:HGNC:40301]	2.606356741	1.382034564	0.040503451	0.31956059	yes	up	0.11	0.17	0.14	0.1	0.42	0.36	0.37	0.23	0.13	0.345
ENSG00000180251	SLC9A4	solute carrier family 9 member A4 [Source:HGNC Symbol;Acc:HGNC:11077]	1.887043484	0.916127668	0.040637512	0.320451583	yes	up	0.11	0.1	0.1	0.1	0.16	0.1	0.37	0.15	0.1025	0.195
ENSG00000243224		novel transcript, antisense to TWF2	0.402001947	-1.314725606	0.040672754	0.320604466	yes	down	0.36	1.02	0.33	0.43	0.21	0.14	0.21	0.23	0.535	0.1975
ENSG00000092200	RPGRIP1	RPGR interacting protein 1 [Source:HGNC Symbol;Acc:HGNC:13436]	0.517261308	-0.951034815	0.040757991	0.321151159	yes	down	0.57	0.45	0.26	0.31	0.12	0.14	0.21	0.8	0.3975	0.3175
ENSG00000270136	MICOS10-NBL1	MICOS10-NBL1 readthrough [Source:HGNC Symbol;Acc:HGNC:48338]	0.100109395	-3.320350721	0.040903296	0.322170544	yes	down	0	0.25	0.26	0	0	0	0	0	0.1275	0
ENSG00000166863	TAC3	tachykinin precursor 3 [Source:HGNC Symbol;Acc:HGNC:11521]	0.359173276	-1.477248084	0.040916078	0.32218756	yes	down	0.99	0.57	0.31	0.73	0.12	0.33	0.39	0	0.65	0.21
ENSG00000172183	ISG20	interferon stimulated exonuclease gene 20 [Source:HGNC Symbol;Acc:HGNC:6130]	0.646062956	-0.630253338	0.040945685	0.322378847	yes	down	0.7	1.22	1.12	1.48	1.06	1.08	1.31	1.14	1.13	1.1475
ENSG00000257653		novel transcript, antisense to ADCY6	4.576729586	2.194317053	0.04096759	0.322509458	yes	up	0	0	0	0.31	0.49	0.3	0	0.83	0.0775	0.405
ENSG00000205038	PKHD1L1	PKHD1 like 1 [Source:HGNC Symbol;Acc:HGNC:20313]	0.543328037	-0.8801046	0.041048337	0.323019371	yes	down	0.89	2.42	0.26	0.81	0.83	0.3	0.02	0.57	1.095	0.43
ENSG00000137821	LRRC49	leucine rich repeat containing 49 [Source:HGNC Symbol;Acc:HGNC:25965]	0.16049294	-2.639418256	0.041097045	0.323318784	yes	down	0.04	0.01	0.02	0.02	0	0	0.01	0	0.0225	0.0025
ENSG00000163701	IL17RE	interleukin 17 receptor E [Source:HGNC Symbol;Acc:HGNC:18439]	0.591242709	-0.758177606	0.041132852	0.323558521	yes	down	0.9	1.48	1.21	0.2	0.32	0.35	0.18	0.22	0.9475	0.2675
ENSG00000152128	TMEM163	transmembrane protein 163 [Source:HGNC Symbol;Acc:HGNC:25380]	0.37720722	-1.406570805	0.041241081	0.324199678	yes	down	0.09	0.19	0.21	0.31	0.03	0.07	0.22	0	0.2	0.08
ENSG00000286656		novel transcript	0.594692821	-0.749783435	0.041444788	0.325590081	yes	down	0.96	1.22	0.88	0.75	0.56	0.9	0.31	0.44	0.9525	0.5525
ENSG00000186642	PDE2A	phosphodiesterase 2A [Source:HGNC Symbol;Acc:HGNC:8777]	0.612721327	-0.706697027	0.041571229	0.326414317	yes	down	0.48	1.38	0.83	0.4	0.7	0.59	0.78	0.88	0.7725	0.7375
ENSG00000217801		protein tyrosine phosphatase family pseudogene	0.61819693	-0.693861604	0.041795474	0.327835613	yes	down	3.34	3.55	1.95	2.65	1.14	2.52	1.17	1.91	2.8725	1.685
ENSG00000134780	DAGLA	diacylglycerol lipase alpha [Source:HGNC Symbol;Acc:HGNC:1165]	0.435129339	-1.2004838	0.04180751	0.327887629	yes	down	0.1	0.15	0.06	0.06	0.05	0.05	0.02	0.02	0.0925	0.035
ENSG00000179528	LBX2	ladybird homeobox 2 [Source:HGNC Symbol;Acc:HGNC:15525]	0.61819399	-0.693868467	0.041837867	0.328083292	yes	down	2.1	1.49	1.64	2.31	2.94	0.46	1.88	1.07	1.885	1.5875
ENSG00000286415		novel transcript	0.332435242	-1.58885476	0.041889763	0.328362912	yes	down	0.08	0.25	0.15	0.28	0	0.09	0.04	0.12	0.19	0.0625
ENSG00000186026	ZNF284	zinc finger protein 284 [Source:HGNC Symbol;Acc:HGNC:13078]	9.658705932	3.271829911	0.041936387	0.328685915	yes	up	0	0	0	0	0.02	0.04	0	0	0	0.015
ENSG00000225889		novel transcript, antisense to PELI1	0.601373184	-0.733667558	0.041960542	0.32874781	yes	down	1.24	0.91	0.73	0.7	0.58	0.39	0.42	0.42	0.895	0.4525
ENSG00000251637	LINC02754	long intergenic non-protein coding RNA 2754 [Source:HGNC Symbol;Acc:HGNC:54274]	1.936018352	0.953092628	0.042012872	0.329030322	yes	up	0.13	0.16	0.1	0.09	0.56	0.09	0.24	0.32	0.12	0.3025
ENSG00000273382	TMEM167B-DT	TMEM167B divergent transcript [Source:HGNC Symbol;Acc:HGNC:55076]	1.573472679	0.653952128	0.04206514	0.329354631	yes	up	0.25	0.31	0.28	0.48	0.39	0.49	0.59	0.59	0.33	0.515
ENSG00000119508	NR4A3	nuclear receptor subfamily 4 group A member 3 [Source:HGNC Symbol;Acc:HGNC:7982]	0.207164935	-2.271148267	0.04206733	0.329329271	yes	down	0.09	0	0.02	0.04	0	0.01	0	0.01	0.0375	0.005
ENSG00000234432		novel transcript	0.207272965	-2.270396142	0.042148536	0.329879857	yes	down	0.08	0.1	0.07	0.05	0	0	0.02	0.03	0.075	0.0125
ENSG00000180152	XIAPP3	X-linked inhibitor of apoptosis pseudogene 3 [Source:HGNC Symbol;Acc:HGNC:52377]	0.164750564	-2.601644691	0.042262322	0.33055718	yes	down	0.34	0.12	0.19	0.32	0	0	0	0.11	0.2425	0.0275
ENSG00000276223		novel transcript, sense intronic to KCNK15	0.164750564	-2.601644691	0.042262322	0.33055718	yes	down	0.6	0.21	0.34	0.56	0	0	0	0.2	0.4275	0.05
ENSG00000177679	SRRM3	serine/arginine repetitive matrix 3 [Source:HGNC Symbol;Acc:HGNC:26729]	0.519880095	-0.943749176	0.042331019	0.330923832	yes	down	0.35	0.43	0.47	0.3	0.09	0.22	0.31	0.14	0.3875	0.19
ENSG00000272986		novel transcript, antisense to RUFY3	0.446656658	-1.162761828	0.042350304	0.331031938	yes	down	1.12	1.16	1.5	0.47	0.47	0.25	0.24	0.87	1.0625	0.4575
ENSG00000286835		novel transcript, sense intronic to ZNF367	0.642824954	-0.63750216	0.042352119	0.33100347	yes	down	4.27	2.86	3.82	3.58	2.18	2.29	2.21	2.44	3.6325	2.28
ENSG00000239392		IMP (inosine monophosphate) dehydrogenase 1 (IMPDH1) pseudogene	0.20763776	-2.267859267	0.042366184	0.331070745	yes	down	0.23	0.1	0.12	0.09	0	0.05	0.05	0	0.135	0.025
ENSG00000271914		novel transcript	0.101482318	-3.300699718	0.042564583	0.33236425	yes	down	1.91	0	0	0	0	0	0	0	0.4775	0
ENSG00000266801		novel transcript, sense intronic to transmembrane and coiled-coil domains 7 TMCO7	0.207966457	-2.265577238	0.042572804	0.332385663	yes	down	0.47	0.49	0.41	0.44	0	0.16	0.15	0	0.4525	0.0775
ENSG00000093072	ADA2	adenosine deaminase 2 [Source:HGNC Symbol;Acc:HGNC:1839]	0.284520769	-1.813394125	0.042643047	0.332762777	yes	down	0	0.14	0.28	0.13	0.07	0	0	0.02	0.1375	0.0225
ENSG00000270062		novel transcript, sense intronic to NIN	4.868771096	2.283557674	0.04280929	0.33393118	yes	up	0	0	0.44	0	0.24	1.29	0.97	0.25	0.11	0.6875
ENSG00000268129		novel transcript	0.509354868	-0.973256963	0.042847974	0.334146999	yes	down	0.68	2.7	2.55	3.11	2.09	1.61	0.38	0.4	2.26	1.12
ENSG00000227811	INKA2-AS1	INKA2 antisense RNA 1 [Source:HGNC Symbol;Acc:HGNC:49446]	0.165758789	-2.592842726	0.042936792	0.334624555	yes	down	0.09	0	0.07	0.08	0	0	0.03	0	0.06	0.0075
ENSG00000224559	LINC01087	long intergenic non-protein coding RNA 1087 [Source:HGNC Symbol;Acc:HGNC:49144]	0.165799122	-2.592491732	0.042983707	0.334947156	yes	down	0	0.06	0.06	0.03	0	0	0	0.02	0.0375	0.005
ENSG00000273091		novel transcript	0.165825605	-2.592261306	0.042993146	0.334977681	yes	down	0.43	0.15	0.62	0	0	0	0.14	0	0.3	0.035
ENSG00000270270	BNIP3P10	BCL2 interacting protein 3 pseudogene 10 [Source:HGNC Symbol;Acc:HGNC:49690]	0.165948997	-2.591188185	0.043072309	0.335465214	yes	down	0.38	0.2	0.65	0.36	0	0	0.18	0	0.3975	0.045
ENSG00000260510		novel transcript, antisense to ACSM3	9.545645694	3.254842789	0.043138551	0.335808685	yes	up	0	0	0	0	0.57	0	1.8	0	0	0.5925
ENSG00000286143		novel protein	9.544769732	3.254710393	0.043216951	0.33628952	yes	up	0	0	0	0	0	0	0.3	0	0	0.075
ENSG00000196668	LINC00173	long intergenic non-protein coding RNA 173 [Source:HGNC Symbol;Acc:HGNC:33791]	0.63426938	-0.656832398	0.043277689	0.336675775	yes	down	2.15	1.29	1.69	2.27	0.47	1.21	2	0.62	1.85	1.075
ENSG00000167371	PRRT2	proline rich transmembrane protein 2 [Source:HGNC Symbol;Acc:HGNC:30500]	1.969956993	0.978164134	0.043425715	0.337567602	yes	up	0.13	0.29	0.11	0.56	0.35	0.26	0.26	0.2	0.2725	0.2675
ENSG00000272046		novel transcript	0.643695589	-0.635549513	0.04344028	0.33763756	yes	down	0.29	0.62	0.23	0.59	0.21	0.25	0.3	0.33	0.4325	0.2725
ENSG00000115956	PLEK	pleckstrin [Source:HGNC Symbol;Acc:HGNC:9070]	0.166498898	-2.586415466	0.043449786	0.337668179	yes	down	0.15	0.03	0.1	0.02	0	0	0.02	0	0.075	0.005
ENSG00000268931		novel transcript, antisense to MARCH2	9.525425532	3.251783544	0.043510574	0.33801069	yes	up	0	0	0	0	0	0.52	0.46	0	0	0.245
ENSG00000156804	FBXO32	F-box protein 32 [Source:HGNC Symbol;Acc:HGNC:16731]	0.552690166	-0.855457153	0.043518987	0.337989477	yes	down	0.13	0.76	0.42	0.49	0.22	0.16	0.27	0.13	0.45	0.195
ENSG00000261519		novel transcript	4.72666855	2.240823702	0.043626079	0.338604463	yes	up	0	0.04	0	0.04	0.11	0.25	0.05	0	0.02	0.1025
ENSG00000129946	SHC2	SHC adaptor protein 2 [Source:HGNC Symbol;Acc:HGNC:29869]	1.758352212	0.814224082	0.043642777	0.338647405	yes	up	0.26	0.48	0.16	0.96	0.33	26.86	0.34	0.69	0.465	7.055
ENSG00000279838		TEC	0.542944817	-0.881122519	0.043653313	0.338685839	yes	down	0.24	0.65	0.6	0.38	0.17	0.14	0.44	0.25	0.4675	0.25
ENSG00000163064	EN1	engrailed homeobox 1 [Source:HGNC Symbol;Acc:HGNC:3342]	0.542268497	-0.882920736	0.043848558	0.340070175	yes	down	0.64	0.32	0.27	0.29	0.29	0.05	0.16	0.28	0.38	0.195
ENSG00000263603		novel transcript	0.393808423	-1.344434126	0.043931505	0.340626385	yes	down	0.91	1.18	0.69	0.21	0.43	0.48	0.22	0.11	0.7475	0.31
ENSG00000236546	MYCL-AS1	MYCL antisense RNA 1 [Source:HGNC Symbol;Acc:HGNC:40386]	0.10366671	-3.269975415	0.043953812	0.340712252	yes	down	0	0.12	0.22	0.13	0	0	0	0	0.1175	0
ENSG00000253919	THAP12P7	THAP domain containing 12 pseudogene 7 [Source:HGNC Symbol;Acc:HGNC:39574]	9.499579937	3.24786372	0.044006567	0.341077602	yes	up	0	0	0	0	0	0.06	0	0.06	0	0.03
ENSG00000162572	SCNN1D	sodium channel epithelial 1 subunit delta [Source:HGNC Symbol;Acc:HGNC:10601]	1.577169617	0.657337824	0.044119472	0.341559938	yes	up	0.26	0.93	0.42	0.23	0.56	0.65	0.69	0.53	0.46	0.6075
ENSG00000153303	FRMD1	FERM domain containing 1 [Source:HGNC Symbol;Acc:HGNC:21240]	1.637452595	0.71145314	0.044132551	0.341617593	yes	up	0.48	0.19	0.41	0.47	0.38	0.18	0.43	0.68	0.3875	0.4175
ENSG00000287825		novel transcript, antisense to CNPY3	0.486513364	-1.03944866	0.04414148	0.341643113	yes	down	1.68	0.48	2.14	1.74	1.31	0.62	0.6	0.32	1.51	0.7125
ENSG00000107159	CA9	carbonic anhydrase 9 [Source:HGNC Symbol;Acc:HGNC:1383]	0.209838016	-2.252652024	0.044152208	0.341682558	yes	down	0.17	0.15	0.19	0.09	0.14	0	0	0	0.15	0.035
ENSG00000248308		UBX domain protein 2A (UBXN2A) pseudogene	2.804960143	1.487980271	0.04430469	0.342731413	yes	up	0.12	0.12	0.4	0.22	0.55	0.69	0.45	0.81	0.215	0.625
ENSG00000227253		novel transcript	9.41084328	3.234324005	0.044776951	0.346031712	yes	up	0	0	0	0	0.14	0.45	0	0	0	0.1475
ENSG00000181392	SYNE4	spectrin repeat containing nuclear envelope family member 4 [Source:HGNC Symbol;Acc:HGNC:26703]	1.830362391	0.872129314	0.044908955	0.34691925	yes	up	0.06	0.27	0.33	0.22	0.37	0.59	0.43	0.59	0.22	0.495
ENSG00000123342	MMP19	matrix metallopeptidase 19 [Source:HGNC Symbol;Acc:HGNC:7165]	0.349489236	-1.516680072	0.044953185	0.347084135	yes	down	0.09	0.1	0.1	0.31	0.13	0.03	0.07	0	0.15	0.0575
ENSG00000287086		novel transcript, antisense to VHL	9.386745783	3.230625088	0.044969948	0.347169368	yes	up	0	0	0	0	0.17	0	0	0.09	0	0.065
ENSG00000277440		novel transcript, sense intronic with DNAJA3	0.346610276	-1.52861367	0.045002372	0.347287104	yes	down	0.93	1.16	0.32	1.57	0	0.94	0.18	0.19	0.995	0.3275
ENSG00000280278	FLJ30679	uncharacterized protein FLJ30679 [Source:NCBI gene (formerly Entrezgene);Acc:146512]	0.47707312	-1.067717693	0.045037336	0.347512717	yes	down	0.17	0.44	0.27	0.46	0.27	0.07	0.07	0.21	0.335	0.155
ENSG00000257869		novel transcript	9.405425561	3.233493222	0.045050091	0.347522723	yes	up	0	0	0	0	0.23	0	0	0.74	0	0.2425
ENSG00000264127	SCML2P1	SCML2 pseudogene 1 [Source:HGNC Symbol;Acc:HGNC:44329]	9.398035497	3.232359217	0.045185176	0.348299046	yes	up	0	0	0	0	0	0	0.08	0.21	0	0.0725
ENSG00000267007		novel transcript, antisense to REXO1	1.877937753	0.909149243	0.045224765	0.348515642	yes	up	0.73	0.61	4.2	2.64	0.39	2.06	6.43	6.63	2.045	3.8775
ENSG00000154079	SDHAF4	succinate dehydrogenase complex assembly factor 4 [Source:HGNC Symbol;Acc:HGNC:20957]	0.609711018	-0.713802478	0.045285181	0.348936898	yes	down	6.28	7.36	5.9	2.58	1.78	3.42	1.78	4.75	5.53	2.9325
ENSG00000254057		novel transcript	9.367366212	3.227643468	0.045429881	0.349874102	yes	up	0	0	0	0	0	0.45	0.23	0.23	0	0.2275
ENSG00000226445		novel transcript	5.217049955	2.383234248	0.045437146	0.349885636	yes	up	0	0.01	0	0.02	0.06	0.1	0	0.09	0.0075	0.0625
ENSG00000280180		novel transcript	2.014712457	1.010573949	0.045500302	0.35023859	yes	up	0.02	0.05	0.09	0.06	0.15	0.1	0.08	0.13	0.055	0.115
ENSG00000198574	SH2D1B	SH2 domain containing 1B [Source:HGNC Symbol;Acc:HGNC:30416]	0.5187904	-0.946776313	0.045547969	0.350472095	yes	down	0.26	0.33	0.25	0.4	0.1	0.65	0.1	0.16	0.31	0.2525
ENSG00000278144			6.453357331	2.690049912	0.045676997	0.351375775	yes	up	0	0	28.06	0	0	0	0	192.74	7.015	48.185
ENSG00000231871	IPO9-AS1	IPO9 antisense RNA 1 [Source:HGNC Symbol;Acc:HGNC:40892]	0.595180926	-0.748599801	0.045746456	0.351865479	yes	down	1.63	3.26	1.21	1.14	1.13	0.43	1.47	1.11	1.81	1.035
ENSG00000288711		novel protein	0.337080464	-1.568835079	0.045816387	0.35235868	yes	down	0	0.11	1.78	0	0	0	0.62	0	0.4725	0.155
ENSG00000271119		novel transcript	3.296591534	1.72097514	0.045822101	0.352357955	yes	up	0	0	0	0.2	0.52	0.18	0	0	0.05	0.175
ENSG00000223502		novel transcript	9.335093762	3.222664513	0.045846656	0.352502093	yes	up	0	0	0	0	0	0	0.7	0.73	0	0.3575
ENSG00000273014		novel transcript	2.473255863	1.306411497	0.045848018	0.352467898	yes	up	0.33	1.14	0.45	1.09	0	7.05	0.62	0	0.7525	1.9175
ENSG00000110237	ARHGEF17	Rho guanine nucleotide exchange factor 17 [Source:HGNC Symbol;Acc:HGNC:21726]	0.631033888	-0.664210612	0.04587998	0.352624236	yes	down	0.19	0.16	0.46	0.18	0.53	0.46	0.3	0.19	0.2475	0.37
ENSG00000243279	PRAF2	PRA1 domain family member 2 [Source:HGNC Symbol;Acc:HGNC:28911]	1.858661893	0.894264355	0.045975887	0.353316596	yes	up	0.38	1.77	0.33	1.05	0.9	1.69	1.18	1.16	0.8825	1.2325
ENSG00000095203	EPB41L4B	erythrocyte membrane protein band 4.1 like 4B [Source:HGNC Symbol;Acc:HGNC:19818]	1.872321974	0.90482855	0.045997054	0.353389729	yes	up	0.06	0.2	0.03	0.15	0.18	0.2	0.2	0.21	0.11	0.1975
ENSG00000008735	MAPK8IP2	mitogen-activated protein kinase 8 interacting protein 2 [Source:HGNC Symbol;Acc:HGNC:6883]	2.418252056	1.273964625	0.04601243	0.353463095	yes	up	0.04	0.04	0.02	0.03	0.13	0.02	0.09	0.07	0.0325	0.0775
ENSG00000189037	DUSP21	dual specificity phosphatase 21 [Source:HGNC Symbol;Acc:HGNC:20476]	0.494059118	-1.017244412	0.046018581	0.353465587	yes	down	1.48	0.62	1.11	0.84	0.57	0.69	0.38	0.3	1.0125	0.485
ENSG00000159708	LRRC36	leucine rich repeat containing 36 [Source:HGNC Symbol;Acc:HGNC:25615]	0.213405228	-2.228332573	0.046024367	0.353465277	yes	down	0.08	0	0.44	0.32	0	0.13	0	0	0.21	0.0325
ENSG00000160973	FOXH1	forkhead box H1 [Source:HGNC Symbol;Acc:HGNC:3814]	0.645756708	-0.630937369	0.046027844	0.353447235	yes	down	0.63	1.07	0.75	0.99	0.26	0.42	0.58	0.78	0.86	0.51
ENSG00000286021	LINC02822	long intergenic non-protein coding RNA 2822 [Source:HGNC Symbol;Acc:HGNC:54353]	1.591291449	0.670198093	0.046072112	0.353742384	yes	up	0.92	0.9	0.89	1.07	1.65	0.7	1.63	1.9	0.945	1.47
ENSG00000129595	EPB41L4A	erythrocyte membrane protein band 4.1 like 4A [Source:HGNC Symbol;Acc:HGNC:13278]	1.944270479	0.959228935	0.046154149	0.354103364	yes	up	1.14	0.09	0.19	0.22	0.34	0.11	0.27	1.44	0.41	0.54
ENSG00000243175	RPSAP36	ribosomal protein SA pseudogene 36 [Source:HGNC Symbol;Acc:HGNC:35727]	9.296082113	3.216622812	0.046164597	0.354138731	yes	up	0	0	0	0	0.06	0.1	0.1	0.06	0	0.08
ENSG00000250950		novel transcript	3.37510381	1.754931877	0.04616817	0.354121367	yes	up	0.69	0	0.18	0	1.37	0.77	0	0.91	0.2175	0.7625
ENSG00000269533		novel transcript	0.161637597	-2.62916529	0.046239088	0.354620488	yes	down	0.65	0.52	0.17	0.19	0.14	0	0	0	0.3825	0.035
ENSG00000137877	SPTBN5	spectrin beta, non-erythrocytic 5 [Source:HGNC Symbol;Acc:HGNC:15680]	5.98893375	2.582299173	0.046243388	0.354608632	yes	up	0	0	0	0	0	0.08	0.01	0.19	0	0.07
ENSG00000224420	ADM5	adrenomedullin 5 (putative) [Source:HGNC Symbol;Acc:HGNC:27293]	5.500681862	2.459610466	0.046288522	0.35473053	yes	up	0.05	0	0	0	0.36	0	0	0	0.0125	0.09
ENSG00000267197		novel transcript, sense intronic with KEAP1	0.251089258	-1.993727786	0.04629955	0.354770225	yes	down	0.57	4.14	2.89	0	0	1.81	0	0	1.9	0.4525
ENSG00000258011	HMGA1P3	high mobility group AT-hook 1 pseudogene 3 [Source:HGNC Symbol;Acc:HGNC:13323]	9.306505704	3.218239583	0.04639727	0.355384341	yes	up	0	0	0	0	0	0	0	2.89	0	0.7225
ENSG00000117560	FASLG	Fas ligand [Source:HGNC Symbol;Acc:HGNC:11936]	0.170794671	-2.54966513	0.04641957	0.355465387	yes	down	0	0	0.27	0.04	0	0.09	0	0	0.0775	0.0225
ENSG00000111291	GPRC5D	G protein-coupled receptor class C group 5 member D [Source:HGNC Symbol;Acc:HGNC:13310]	1.684437626	0.752267007	0.046506174	0.356038688	yes	up	0.56	0.58	2.23	1.49	2.63	2.02	1.97	1.61	1.215	2.0575
ENSG00000260350		novel transcript, antisense to PMM2	9.288872876	3.215503549	0.046541698	0.356220739	yes	up	0	0	0	0	0	0.36	0	1.02	0	0.345
ENSG00000227392	HPN-AS1	HPN antisense RNA 1 [Source:HGNC Symbol;Acc:HGNC:47041]	0.349246174	-1.517683782	0.04655448	0.356183755	yes	down	0.06	0.11	0.16	0.13	0.08	0	0.04	0.02	0.115	0.035
ENSG00000222046	DCDC2B	doublecortin domain containing 2B [Source:HGNC Symbol;Acc:HGNC:32576]	5.940654072	2.570621782	0.046607592	0.356500183	yes	up	0.04	0	0	0	0.11	0.07	0.04	0.08	0.01	0.075
ENSG00000258857		novel transcript	9.285653489	3.215003445	0.04664899	0.356726878	yes	up	0	0	0	0	0	0	0	0.98	0	0.245
ENSG00000243797		novel transcript, sense overlapping CCDC71L	9.285653489	3.215003445	0.04664899	0.356726878	yes	up	0	0	0	0	0	0	0	0.84	0	0.21
ENSG00000226889		novel transcript	4.731370215	2.242258052	0.046652813	0.356666195	yes	up	0.38	0	0	0	0.91	1.15	0	0	0.095	0.515
ENSG00000168329	CX3CR1	C-X3-C motif chemokine receptor 1 [Source:HGNC Symbol;Acc:HGNC:2558]	9.268221373	3.212292504	0.046792605	0.357419612	yes	up	0	0	0	0	0	0.02	0	0.06	0	0.02
ENSG00000249633	OR52V1P	olfactory receptor family 52 subfamily V member 1 pseudogene [Source:HGNC Symbol;Acc:HGNC:15238]	9.268221373	3.212292504	0.046792605	0.357419612	yes	up	0	0	0	0	0	0.09	0	0.29	0	0.095
ENSG00000154025	SLC5A10	solute carrier family 5 member 10 [Source:HGNC Symbol;Acc:HGNC:23155]	9.245093858	3.208687966	0.04682325	0.357563648	yes	up	0	0	0	0	0.02	0.03	0	0.02	0	0.0175
ENSG00000240882		prostate tumor overexpressed 1 (PTOV1) pseudogene	9.258392047	3.210761655	0.046874115	0.357816948	yes	up	0	0	0	0	0	0	0.06	0.19	0	0.0625
ENSG00000231955		novel transcript	1.594217706	0.672848657	0.046893634	0.35792091	yes	up	0.66	0.28	0.8	0.9	0.71	1.05	1.41	1.02	0.66	1.0475
ENSG00000235207	TUBBP6	tubulin beta class I pseudogene 6 [Source:HGNC Symbol;Acc:HGNC:42175]	5.955175876	2.574144116	0.046907273	0.357934944	yes	up	0	0	0.05	0	0.05	0.22	0.05	0.11	0.0125	0.1075
ENSG00000235618	FAM21EP	family with sequence similarity 21 member E, pseudogene [Source:HGNC Symbol;Acc:HGNC:45010]	0.406591774	-1.298347068	0.046921947	0.358001887	yes	down	0.03	0.28	0.25	0.27	0.06	0.07	0.13	0.07	0.2075	0.0825
ENSG00000229937	PRPS1L1	phosphoribosyl pyrophosphate synthetase 1 like 1 [Source:HGNC Symbol;Acc:HGNC:9463]	9.250832975	3.209583276	0.046936408	0.358067188	yes	up	0	0	0	0	0	0.15	0	0.15	0	0.075
ENSG00000248774		novel transcript	9.221209537	3.204956	0.046941929	0.358064273	yes	up	0	0	0	0	0.43	0.48	0	0	0	0.2275
ENSG00000226761	TAS2R46	taste 2 receptor member 46 [Source:HGNC Symbol;Acc:HGNC:18877]	9.241028152	3.208053374	0.047018026	0.358509497	yes	up	0	0	0	0	0	0.09	0.09	0.18	0	0.09
ENSG00000270706	PRMT1P1	protein arginine methyltransferase 1 pseudogene 1 [Source:HGNC Symbol;Acc:HGNC:49611]	9.241028152	3.208053374	0.047018026	0.358509497	yes	up	0	0	0	0	0	0.08	0.08	0.16	0	0.08
ENSG00000259429	UBE2Q2P2	ubiquitin conjugating enzyme E2 Q2 pseudogene 2 [Source:HGNC Symbol;Acc:HGNC:37440]	0.385938087	-1.373558669	0.047030388	0.358513628	yes	down	1.46	0.83	1.68	0.91	0.22	0.93	0	0.22	1.22	0.3425
ENSG00000239256	RPL35AP35	ribosomal protein L35a pseudogene 35 [Source:HGNC Symbol;Acc:HGNC:36677]	9.239147181	3.20775969	0.047034823	0.358502386	yes	up	0	0	0	0	0.62	0	0	1.86	0	0.62
ENSG00000286035		novel transcript	0.349876022	-1.515084299	0.047039855	0.358495702	yes	down	0.18	0.06	0.12	0.06	0.04	0.06	0	0.04	0.105	0.035
ENSG00000279369		TEC	4.718244759	2.23825026	0.047059957	0.358603844	yes	up	0	0.08	0	0	0.11	0.08	0.15	0.08	0.02	0.105
ENSG00000251452		adrenocortical dysplasia homolog (mouse) (ACD) pseudogene	9.233488214	3.20687577	0.047080401	0.358714575	yes	up	0	0	0	0	0	0.96	0	0.3	0	0.315
ENSG00000258982		novel transcript, antisense to YY1	9.233488214	3.20687577	0.047080401	0.358714575	yes	up	0	0	0	0	0	2.3	0	0.68	0	0.745
ENSG00000079435	LIPE	lipase E, hormone sensitive type [Source:HGNC Symbol;Acc:HGNC:6621]	9.231237061	3.206523994	0.047099706	0.3587265	yes	up	0	0	0	0	0	0	0.03	0.12	0	0.0375
ENSG00000215838		carbonic anhydrase XIV (CA14) pseudogene	9.231237061	3.206523994	0.047099706	0.3587265	yes	up	0	0	0	0	0	0	0.16	0.13	0	0.0725
ENSG00000240954	RPL4P1	ribosomal protein L4 pseudogene 1 [Source:HGNC Symbol;Acc:HGNC:23551]	9.231237061	3.206523994	0.047099706	0.3587265	yes	up	0	0	0	0	0	0	0.12	0.12	0	0.06
ENSG00000162692	VCAM1	vascular cell adhesion molecule 1 [Source:HGNC Symbol;Acc:HGNC:12663]	9.231237061	3.206523994	0.047099706	0.3587265	yes	up	0	0	0	0	0	0	0.05	0.03	0	0.02
ENSG00000203411	Metazoa_SRP	Metazoan signal recognition particle RNA [Source:RFAM;Acc:RF00017]	9.22961114	3.206269866	0.047113256	0.35864959	yes	up	0	0	0	0	0	0	1.96	1.83	0	0.9475
ENSG00000205634	LINC00898	long intergenic non-protein coding RNA 898 [Source:HGNC Symbol;Acc:HGNC:48581]	9.223707847	3.205346818	0.047162127	0.358931533	yes	up	0	0	0	0	0	0.03	0.02	0.02	0	0.0175
ENSG00000173213	TUBB8B	tubulin beta 8B [Source:HGNC Symbol;Acc:HGNC:24983]	9.223707847	3.205346818	0.047162127	0.358931533	yes	up	0	0	0	0	0	0.21	0.05	0.11	0	0.0925
ENSG00000260871		novel transcript, overlapping CETN3	9.223707847	3.205346818	0.047162127	0.358931533	yes	up	0	0	0	0	0	0.19	0.09	0.1	0	0.095
ENSG00000131044	TTLL9	tubulin tyrosine ligase like 9 [Source:HGNC Symbol;Acc:HGNC:16118]	9.22183095	3.205053219	0.047178949	0.358879467	yes	up	0	0	0	0	0.03	0.08	0	0.05	0	0.04
ENSG00000257957	QRSL1P3	QRSL1 pseudogene 3 [Source:HGNC Symbol;Acc:HGNC:43669]	9.22183095	3.205053219	0.047178949	0.358879467	yes	up	0	0	0	0	0.05	0.06	0	0.12	0	0.0575
ENSG00000231395	ARL4AP4	ADP ribosylation factor like GTPase 4A pseudogene 4 [Source:HGNC Symbol;Acc:HGNC:52373]	4.063817218	2.022835514	0.047181332	0.358807609	yes	up	0.23	0	0.2	0.22	0.66	0	0.67	1.61	0.1625	0.735
ENSG00000166145	SPINT1	serine peptidase inhibitor, Kunitz type 1 [Source:HGNC Symbol;Acc:HGNC:11246]	0.646398853	-0.629503457	0.047223504	0.35899331	yes	down	0.61	1	0.83	0.98	0.29	0.76	0.92	0.43	0.855	0.6
ENSG00000254542	NAV2-AS3	NAV2 antisense RNA 3 [Source:HGNC Symbol;Acc:HGNC:40742]	9.216187006	3.204169991	0.047224582	0.358956524	yes	up	0	0	0	0	0	0.72	0	0	0	0.18
ENSG00000263815	RN7SL426P	RNA, 7SL, cytoplasmic 426, pseudogene [Source:HGNC Symbol;Acc:HGNC:46442]	9.216187006	3.204169991	0.047224582	0.358956524	yes	up	0	0	0	0	0	4.61	0	0	0	1.1525
ENSG00000264515	VSTM2B-DT	VSTM2B divergent transcript [Source:HGNC Symbol;Acc:HGNC:27615]	9.216187006	3.204169991	0.047224582	0.358956524	yes	up	0	0	0	0	0	0.13	0	0	0	0.0325
ENSG00000187944	C2orf66	chromosome 2 open reading frame 66 [Source:HGNC Symbol;Acc:HGNC:33809]	9.216187006	3.204169991	0.047224582	0.358956524	yes	up	0	0	0	0	0	0.22	0	0	0	0.055
ENSG00000286882		novel transcript, antisense to FER	9.216187006	3.204169991	0.047224582	0.358956524	yes	up	0	0	0	0	0	0.23	0	0	0	0.0575
ENSG00000105492	SIGLEC6	sialic acid binding Ig like lectin 6 [Source:HGNC Symbol;Acc:HGNC:10875]	1.916413437	0.938408834	0.047245897	0.3588937	yes	up	0.22	0.23	0.24	0.09	0.2	0.36	0.18	0.29	0.195	0.2575
ENSG00000176115	AQP7P4	aquaporin 7 pseudogene 4 [Source:HGNC Symbol;Acc:HGNC:32056]	9.212066572	3.203524837	0.04726075	0.358961583	yes	up	0	0	0	0	0.07	0	0.07	0.16	0	0.075
ENSG00000205622		novel transcript	9.212066572	3.203524837	0.04726075	0.358961583	yes	up	0	0	0	0	0.07	0	0.07	0.15	0	0.0725
ENSG00000213695	RPS7P14	ribosomal protein S7 pseudogene 14 [Source:HGNC Symbol;Acc:HGNC:36602]	9.20643105	3.202641992	0.047306415	0.359173508	yes	up	0	0	0	0	0	0.56	0.18	0	0	0.185
ENSG00000224682	SOCS5P2	suppressor of cytokine signaling 5 pseudogene 2 [Source:HGNC Symbol;Acc:HGNC:44598]	9.20643105	3.202641992	0.047306415	0.359173508	yes	up	0	0	0	0	0	0.16	0.05	0	0	0.0525
ENSG00000166363	OR10A5	olfactory receptor family 10 subfamily A member 5 [Source:HGNC Symbol;Acc:HGNC:15131]	9.204558221	3.20234848	0.047323262	0.359166569	yes	up	0	0	0	0	0.08	0.17	0	0.09	0	0.085
ENSG00000227176	NSA2P5	NSA2 pseudogene 5 [Source:HGNC Symbol;Acc:HGNC:54584]	9.204188221	3.202290486	0.047325762	0.359140609	yes	up	0	0	0	0	0	0	0.34	0.12	0	0.115
ENSG00000287671		novel transcript	5.930333911	2.568113339	0.04736307	0.35937877	yes	up	0	0	0	0.01	0.01	0.02	0.02	0.03	0.0025	0.02
ENSG00000233204	MAPRE1P3	MAPRE1 pseudogene 3 [Source:HGNC Symbol;Acc:HGNC:37762]	9.196688775	3.201114519	0.047388309	0.359525307	yes	up	0	0	0	0	0	0.22	0.22	0	0	0.11
ENSG00000232079	LINC01697	long intergenic non-protein coding RNA 1697 [Source:HGNC Symbol;Acc:HGNC:52485]	9.196688775	3.201114519	0.047388309	0.359525307	yes	up	0	0	0	0	0	0.32	0.19	0	0	0.1275
ENSG00000246877	DNM1P35	dynamin 1 pseudogene 35 [Source:HGNC Symbol;Acc:HGNC:35182]	9.196688775	3.201114519	0.047388309	0.359525307	yes	up	0	0	0	0	0	0.04	0.04	0	0	0.02
ENSG00000266651		novel transcript	9.194818226	3.200821054	0.047405171	0.359518351	yes	up	0	0	0	0	0.9	1.03	0.89	0.89	0	0.9275
ENSG00000186522	SEPTIN10	septin 10 [Source:HGNC Symbol;Acc:HGNC:14349]	9.194818226	3.200821054	0.047405171	0.359518351	yes	up	0	0	0	0	0.19	0.19	0.04	0.03	0	0.1125
ENSG00000237338	FTCD-AS1	FTCD antisense RNA 1 [Source:HGNC Symbol;Acc:HGNC:40243]	9.194818226	3.200821054	0.047405171	0.359518351	yes	up	0	0	0	0	0.24	0.25	0.24	0.25	0	0.245
ENSG00000243629	LINC00880	long intergenic non-protein coding RNA 880 [Source:HGNC Symbol;Acc:HGNC:27948]	9.192948047	3.200527587	0.047422037	0.359511427	yes	up	0	0	0	0	0.07	0	0	0.07	0	0.035
ENSG00000217078		pseudogene similar to part of eukaryotic translation initiation factor 2 subunit 2 EIF2S2	9.192948047	3.200527587	0.047422037	0.359511427	yes	up	0	0	0	0	0.86	0	0	0.88	0	0.435
ENSG00000279722		novel transcript	2.545483675	1.347939813	0.047430147	0.359483065	yes	up	0	0.06	0.1	0.11	0.42	0.06	0.11	0.12	0.0675	0.1775
ENSG00000287362		novel transcript	5.928553536	2.567680155	0.047438764	0.359503459	yes	up	0	0	0.05	0	0.05	0.05	0.26	0.05	0.0125	0.1025
ENSG00000240401		novel transcript, antisense to CCDC88A	4.462624438	2.157892398	0.047465892	0.359664113	yes	up	0.4	0	0	0.08	0.54	0.37	0.29	0.15	0.12	0.3375
ENSG00000286646		novel transcript, antisense to MAP3K5	9.18732891	3.199645479	0.047467763	0.359633365	yes	up	0	0	0	0	0.07	0.21	0	0	0	0.07
ENSG00000232732		novel transcript	9.18732891	3.199645479	0.047467763	0.359633365	yes	up	0	0	0	0	0.13	0.32	0	0	0	0.1125
ENSG00000225125	RANP4	RAN pseudogene 4 [Source:HGNC Symbol;Acc:HGNC:39859]	9.18732891	3.199645479	0.047467763	0.359633365	yes	up	0	0	0	0	0.14	0.46	0	0	0	0.15
ENSG00000197893	NRAP	nebulin related anchoring protein [Source:HGNC Symbol;Acc:HGNC:7988]	9.18732891	3.199645479	0.047467763	0.359633365	yes	up	0	0	0	0	0.01	0.03	0	0	0	0.01
ENSG00000213653	RPL22P22	ribosomal protein L22 pseudogene 22 [Source:HGNC Symbol;Acc:HGNC:36109]	9.186960168	3.199587574	0.047470264	0.359472735	yes	up	0	0	0	0	0	0.51	1.37	0	0	0.47
ENSG00000270240		novel transcript, antisense to CCL5	9.186960168	3.199587574	0.047470264	0.359472735	yes	up	0	0	0	0	0	0.15	0.43	0	0	0.145
ENSG00000172123	SLFN12	schlafen family member 12 [Source:HGNC Symbol;Acc:HGNC:25500]	9.17761325	3.198119012	0.047549778	0.359940072	yes	up	0	0	0	0	0.03	0.1	0.03	0	0	0.04
ENSG00000248746	ACTN3	actinin alpha 3 [Source:HGNC Symbol;Acc:HGNC:165]	9.17761325	3.198119012	0.047549778	0.359940072	yes	up	0	0	0	0	0.02	0.1	0.02	0	0	0.035
ENSG00000287356		novel transcript, antisense to MORN1	9.17761325	3.198119012	0.047549778	0.359940072	yes	up	0	0	0	0	0.01	0.02	0.02	0	0	0.0125
ENSG00000259408		novel transcript, antisense to RYR3	9.17761325	3.198119012	0.047549778	0.359940072	yes	up	0	0	0	0	0.08	0.17	0.08	0	0	0.0825
ENSG00000166589	CDH16	cadherin 16 [Source:HGNC Symbol;Acc:HGNC:1755]	9.177245214	3.198061157	0.04755228	0.359779434	yes	up	0	0	0	0	0	0	0.07	0	0	0.0175
ENSG00000215630	GUSBP9	GUSB pseudogene 9 [Source:HGNC Symbol;Acc:HGNC:42323]	0.106248323	-3.234488019	0.047576326	0.359871603	yes	down	0.79	0	0	0	0	0	0	0	0.1975	0
ENSG00000244021		ribosomal protein L21 (RPL21) pseudogene	0.107085373	-3.223166664	0.047605262	0.360045579	yes	down	0	0	0	1.09	0	0	0	0	0.2725	0
ENSG00000132437	DDC	dopa decarboxylase [Source:HGNC Symbol;Acc:HGNC:2719]	9.167911231	3.196593075	0.047631854	0.3601569	yes	up	0	0	0	0	0.05	0.09	0.1	0	0	0.06
ENSG00000285831		novel transcript	9.166047388	3.196299744	0.04764876	0.360239829	yes	up	0	0	0	0	0.03	0	0.01	0.02	0	0.015
ENSG00000273492	APP-DT	APP divergent transcript [Source:HGNC Symbol;Acc:HGNC:55075]	9.172695234	3.197345707	0.047674738	0.360391316	yes	up	0	0	0	0	0.05	0	0	0.06	0	0.0275
ENSG00000254132	MTND6P3	MT-ND6 pseudogene 3 [Source:HGNC Symbol;Acc:HGNC:39466]	5.899009406	2.560472709	0.047677862	0.360325127	yes	up	0.21	0	0	0	0.42	0.86	0.41	0	0.0525	0.4225
ENSG00000227145	IL21-AS1	IL21 antisense RNA 1 [Source:HGNC Symbol;Acc:HGNC:40299]	0.285482934	-1.808523591	0.0476877	0.360354588	yes	down	0.17	0.14	0.16	0.17	0.02	0.02	0.04	0.08	0.16	0.04
ENSG00000226174	TEX22	testis expressed 22 [Source:HGNC Symbol;Acc:HGNC:40026]	4.048902679	2.017530966	0.047695483	0.360368511	yes	up	0.03	0	0.04	0	0.1	0.18	0.12	0.03	0.0175	0.1075
ENSG00000271857		novel transcript, antisense to RUNX2	9.158589501	3.195125428	0.047711488	0.360399664	yes	up	0	0	0	0	0.17	0.18	0	0	0	0.0875
ENSG00000232467	TMA16P2	translation machinery associated 16 homolog pseudogene 2 [Source:HGNC Symbol;Acc:HGNC:43781]	9.158222838	3.195067669	0.047713991	0.3603737	yes	up	0	0	0	0	0.17	0	0.51	0	0	0.17
ENSG00000168306	ACOX2	acyl-CoA oxidase 2 [Source:HGNC Symbol;Acc:HGNC:120]	9.158222838	3.195067669	0.047713991	0.3603737	yes	up	0	0	0	0	0.15	0	0.49	0	0	0.16
ENSG00000270424		PRKC, apoptosis, WT1, regulator (PAWR) pseudogene	9.158222838	3.195067669	0.047713991	0.3603737	yes	up	0	0	0	0	0.15	0	0.46	0	0	0.1525
ENSG00000117407	ARTN	artemin [Source:HGNC Symbol;Acc:HGNC:727]	5.914435652	2.564240515	0.047726163	0.360331042	yes	up	0	0	0.24	0	0.58	0.06	0.06	0.29	0.06	0.2475
ENSG00000278344		novel transcript	9.148914018	3.193600505	0.047793685	0.360661287	yes	up	0	0	0	0	1.08	0.61	0.54	0	0	0.5575
ENSG00000239617	RPL32P27	ribosomal protein L32 pseudogene 27 [Source:HGNC Symbol;Acc:HGNC:36924]	9.148914018	3.193600505	0.047793685	0.360661287	yes	up	0	0	0	0	0.81	0.45	0.41	0	0	0.4175
ENSG00000267369	TAF5LP1	TATA-box binding protein associated factor 5 like pseudogene 1 [Source:HGNC Symbol;Acc:HGNC:24115]	9.147054598	3.193307262	0.047810619	0.360699343	yes	up	0	0	0	0	0.25	0	0	0.09	0	0.085
ENSG00000261286	ATP2C2-AS1	ATP2C2 antisense RNA 1 [Source:HGNC Symbol;Acc:HGNC:53167]	9.147054598	3.193307262	0.047810619	0.360699343	yes	up	0	0	0	0	0.06	0	0	0.02	0	0.02
ENSG00000233966	UBE2SP1	ubiquitin conjugating enzyme E2 S pseudogene 1 [Source:HGNC Symbol;Acc:HGNC:30864]	0.106880312	-3.225931971	0.047821412	0.360691053	yes	down	0.31	0	0	0.29	0	0	0	0	0.15	0
ENSG00000234742		ribosomal protein L17 (RPL17) pseudogene	9.163100095	3.195835779	0.047837154	0.360764928	yes	up	0	0	0	0	0.19	0.41	0	0.2	0	0.2
ENSG00000278972		TEC	9.139252133	3.192076114	0.047875942	0.361012572	yes	up	0	0	0	0	0.05	0	0.05	0	0	0.025
ENSG00000274093		novel transcript, sense intronic to NFAT5	9.139252133	3.192076114	0.047875942	0.361012572	yes	up	0	0	0	0	0.66	0	0.66	0	0	0.33
ENSG00000236928		GrpE-like 1, mitochondrial (E. coli) (GRPEL1) pseudogene	9.139252133	3.192076114	0.047875942	0.361012572	yes	up	0	0	0	0	0.44	0	0.44	0	0	0.22
ENSG00000161544	CYGB	cytoglobin [Source:HGNC Symbol;Acc:HGNC:16505]	0.17122399	-2.546043243	0.047986928	0.361624724	yes	down	0.21	0.22	0.44	0	0	0	0	0.04	0.2175	0.01
ENSG00000213133	PPP1R14BP5	protein phosphatase 1 regulatory inhibitor subunit 14B pseudogene 5 [Source:HGNC Symbol;Acc:HGNC:16332]	9.120332999	3.189086501	0.048038131	0.361920667	yes	up	0	0	0	0	0.96	0	0.32	0	0	0.32
ENSG00000120451	SNX19	sorting nexin 19 [Source:HGNC Symbol;Acc:HGNC:21532]	9.120332999	3.189086501	0.048038131	0.361920667	yes	up	0	0	0	0	0.23	0	0	0	0	0.0575
ENSG00000230790		novel transcript	9.120332999	3.189086501	0.048038131	0.361920667	yes	up	0	0	0	0	0.57	0	0.19	0	0	0.19
ENSG00000267262		novel transcript, antisense to RFX2	9.120332999	3.189086501	0.048038131	0.361920667	yes	up	0	0	0	0	0.56	0	0.19	0	0	0.1875
ENSG00000274290	H2BC6	H2B clustered histone 6 [Source:HGNC Symbol;Acc:HGNC:4753]	1.612385167	0.689196417	0.048051707	0.36175338	yes	up	0.6	2.45	0.55	1.39	1.38	1.49	2.07	1.76	1.2475	1.675
ENSG00000287339		novel transcript	0.253937674	-1.977453647	0.048089481	0.361947928	yes	down	0.13	0.68	0.57	0.37	0	0	0	0.4	0.4375	0.1
ENSG00000272033		novel transcript, sense intronic to POU2F1	0.286186169	-1.804974146	0.048129721	0.36216093	yes	down	0.22	0.08	0.19	0.07	0.04	0.04	0.04	0.04	0.14	0.04
ENSG00000273106	PPM1B-DT	PPM1B divergent transcript [Source:HGNC Symbol;Acc:HGNC:55161]	9.101465334	3.186098838	0.048200559	0.362648976	yes	up	0	0	0	0	0.24	0	0	0	0	0.06
ENSG00000197376		biorientation of chromosomes in cell division 1 like 2 (BOD1L2) pseudogene	9.101465334	3.186098838	0.048200559	0.362648976	yes	up	0	0	0	0	1.35	0	0	0	0	0.3375
ENSG00000228331	RPL17P43	ribosomal protein L17 pseudogene 43 [Source:HGNC Symbol;Acc:HGNC:35996]	9.101465334	3.186098838	0.048200559	0.362648976	yes	up	0	0	0	0	0.7	0	0	0	0	0.175
ENSG00000233984	RPSAP14	ribosomal protein SA pseudogene 14 [Source:HGNC Symbol;Acc:HGNC:6506]	9.115988409	3.18839909	0.048321527	0.36337884	yes	up	0	0	0	0	0	0	2.1	0	0	0.525
ENSG00000255856		novel transcript	9.115988409	3.18839909	0.048321527	0.36337884	yes	up	0	0	0	0	0	0	0.6	0	0	0.15
ENSG00000176909	MAMSTR	MEF2 activating motif and SAP domain containing transcriptional regulator [Source:HGNC Symbol;Acc:HGNC:26689]	0.503647556	-0.989513582	0.048351995	0.363472791	yes	down	0.64	0.47	0.33	0.35	0.18	0.15	0.18	0.36	0.4475	0.2175
ENSG00000274184		novel transcript, antisense to ZSCAN30	5.882175674	2.556349872	0.048408358	0.363806322	yes	up	0.03	0	0	0	0.03	0.07	0.07	0.1	0.0075	0.0675
ENSG00000260740		novel transcript, antisense to SLC5A2	5.881389108	2.556156941	0.048425785	0.363892214	yes	up	0.19	0	0	0	0.36	0.19	0.18	0.75	0.0475	0.37
ENSG00000268222	EEF1A1P7	eukaryotic translation elongation factor 1 alpha 1 pseudogene 7 [Source:HGNC Symbol;Acc:HGNC:3202]	9.08964578	3.184224074	0.048467233	0.364113462	yes	up	0	0	0	0	0.15	0.05	0	0	0	0.05
ENSG00000257410		novel transcript	0.107163006	-3.22212114	0.04855701	0.36447197	yes	down	0.21	0	0	0	0	0	0	0	0.0525	0
ENSG00000229887	HNRNPA1P6	heterogeneous nuclear ribonucleoprotein A1 pseudogene 6 [Source:HGNC Symbol;Acc:HGNC:5032]	0.25505923	-1.971095786	0.048591883	0.364643492	yes	down	0.18	0.07	0.22	0.24	0	0	0.1	0.05	0.1775	0.0375
ENSG00000159409	CELF3	CUGBP Elav-like family member 3 [Source:HGNC Symbol;Acc:HGNC:11967]	2.891240973	1.531688857	0.048627784	0.364867766	yes	up	0	0.02	0.04	0.01	0.02	0.06	0.09	0.06	0.0175	0.0575
ENSG00000205922	ONECUT3	one cut homeobox 3 [Source:HGNC Symbol;Acc:HGNC:13399]	5.871305649	2.553681362	0.04863087	0.36480068	yes	up	0.01	0	0	0	0	0.05	0.02	0	0.0025	0.0175
ENSG00000254592		novel transcript	0.254800283	-1.972561218	0.048631885	0.364763186	yes	down	0.11	0.48	0.8	0.11	0.11	0.11	0.11	0	0.375	0.0825
ENSG00000259308	FABP5P8	fatty acid binding protein 5 pseudogene 8 [Source:HGNC Symbol;Acc:HGNC:31063]	4.026507896	2.009529162	0.048653264	0.364878429	yes	up	0	0.85	0.35	0	0	0.85	2.31	1.96	0.3	1.28
ENSG00000176641	RNF152	ring finger protein 152 [Source:HGNC Symbol;Acc:HGNC:26811]	5.868729024	2.553048096	0.048687292	0.365088487	yes	up	0.01	0	0	0	0.01	0.01	0.13	0.02	0.0025	0.0425
ENSG00000198758	EPS8L3	EPS8 like 3 [Source:HGNC Symbol;Acc:HGNC:21297]	5.862208599	2.551444305	0.048819933	0.365811807	yes	up	0.03	0	0	0	0	0.13	0.13	0	0.0075	0.065
ENSG00000246898	LINC00920	long intergenic non-protein coding RNA 920 [Source:HGNC Symbol;Acc:HGNC:48611]	0.483424292	-1.048638125	0.049016849	0.367060627	yes	down	0.1	0.36	0.5	0.24	0.15	0.06	0.16	0.2	0.3	0.1425
ENSG00000188483	IER5L	immediate early response 5 like [Source:HGNC Symbol;Acc:HGNC:23679]	0.59790854	-0.742003278	0.049045304	0.367183056	yes	down	0.47	0.6	0.23	0.39	0.27	0.34	0.07	0.3	0.4225	0.245
ENSG00000254473		novel transcript, antisense to UBQLN1	1.933060443	0.950886749	0.049101065	0.367555159	yes	up	0.56	0.41	0.21	0.79	1.22	0.71	1.38	0.81	0.4925	1.03
ENSG00000228838		novel transcript	5.845000803	2.547203223	0.049193642	0.368111893	yes	up	0	0.15	0	0	0.14	0.58	0.28	0.15	0.0375	0.2875
ENSG00000262155	LINC02175	long intergenic non-protein coding RNA 2175 [Source:HGNC Symbol;Acc:HGNC:27550]	1.520782607	0.604813937	0.049275832	0.368408809	yes	up	1.09	0.7	0.66	0.74	1.34	1.03	1.24	1.05	0.7975	1.165
ENSG00000074410	CA12	carbonic anhydrase 12 [Source:HGNC Symbol;Acc:HGNC:1371]	2.067060575	1.047580667	0.049474895	0.369623771	yes	up	0.07	0.19	0.04	0.13	1.01	0.28	0.03	0.69	0.1075	0.5025
ENSG00000272541		novel transcript	0.188694684	-2.405874314	0.049540844	0.370025333	yes	down	0.76	0.79	0.23	0	0.24	0	0	0	0.445	0.06
ENSG00000224837	GCSHP5	glycine cleavage system protein H pseudogene 5 [Source:HGNC Symbol;Acc:HGNC:44195]	0.108525437	-3.203894857	0.049653457	0.370729512	yes	down	0	0.37	0	0.56	0	0	0	0	0.2325	0
ENSG00000106560	GIMAP2	GTPase, IMAP family member 2 [Source:HGNC Symbol;Acc:HGNC:21789]	0.518397918	-0.947868172	0.049657022	0.370710505	yes	down	0.61	0.63	0.62	0.86	0.05	0.41	0.4	0.47	0.68	0.3325
ENSG00000266903	CEACAM16-AS1	CEACAM16, CEACAM19 and PVR antisense RNA 1 [Source:HGNC Symbol;Acc:HGNC:55317]	0.387613365	-1.367309778	0.049658846	0.370678509	yes	down	0.33	0.35	0.21	0.27	0	0.09	0.35	0.1	0.29	0.135
ENSG00000258384	RCCD1-AS1	RCCD1 and UNC45A antisense RNA 1 [Source:HGNC Symbol;Acc:HGNC:54811]	2.036472228	1.02607214	0.049728095	0.37101281	yes	up	0.19	0.12	0.29	0.11	0.25	0.37	0.33	0.5	0.1775	0.3625
ENSG00000169031	COL4A3	collagen type IV alpha 3 chain [Source:HGNC Symbol;Acc:HGNC:2204]	5.819312028	2.540848605	0.04973782	0.371039737	yes	up	0	0.01	0	0	0.04	0.12	0	0	0.0025	0.04
ENSG00000249249		novel transcript	0.58797239	-0.766179684	0.049844435	0.371606585	yes	down	0.54	0.39	0.43	0.6	0.16	0.52	0.2	0.22	0.49	0.275
ENSG00000287988		methylenetetrahydrofolate dehydrogenase (NADP+ dependent) 1 like (MTHFD1L) pseudogene	1.778076966	0.830317774	0.049874629	0.371786003	yes	up	0.5	0.2	0.58	0.76	0	1.36	1.37	1.47	0.51	1.05
